# Supplementary material for: Technology Roadmapping Architecture Based on Knowledge Management: Case Study for Improved Indigenous Coffee Production from Guerrero, Mexico
Source: Hindawi journal article supplement (doi:10.1155/2019/5860905), 2019-05-09
Supplement: f1 [file 5860905.f1.zip]

Archive with 2 entries (2 files):
- Macro level.xls
- Micro level and roadmapping structure.xlsx
