# Supplementary material for: Technology Roadmapping Architecture Based on Knowledge Management: Case Study for Improved Indigenous Coffee Production from Guerrero, Mexico
Source: Hindawi journal article supplement (doi:10.1155/2019/5860905), 2019-05-09
Supplement: f1 [file 5860905.f1.zip › Macro level.xls]

## Sheet: Communities
ENTIDAD	NOM_ENT	MUN	NOM_MUN	LOC	NOM_LOC	LONGITUD	LATITUD	ALTITUD	CARRETERA	DISCARRE	TRANSPUB	TIEMPO	FRECTRANS	COSTOTRANS	HLENGUA	QDIALECT	LUGUSO4	LUGUSO1	LUGUSO2	LUGUSO3	LUGUSO5	ACTECO1	ACTECO2	ACTECO3	CONFLICTO1	CONFLICTO2	CONFLICTO3	CONFLICTO4	CONFLICTO5	PROBLEMA	REDAGUA	COBROAGUA	RDRENAJE	DDRENAJE	LIMCALLE	RECBASURA	DESBASURA	EQUIPA1	EQUIPA2	EQUIPA3	EQUIPA4	EQUIPA5	SERPUB1	SERPUB2	SERPUB3	SERPUB4	COMERCIO1	COMERCIO2	COMERCIO3
12	Guerrero	001	Acapulco de Juárez	0077	Agua del Perro	0993354	170544	0263	Terracería	Conexa a carretera	No hay transporte	No hay transporte	No hay transporte	No hay transporte	Sin hablantes de lengua indígena	Sin hablantes de lengua indígena	Sin hablantes de lengua indígena	Sin hablantes de lengua indígena	Sin hablantes de lengua indígena	Sin hablantes de lengua indígena	Sin hablantes de lengua indígena	Agricultura	NE	NE	NO	NO	NO	NO	NO	Falta de equipamiento o servicios de salud	NA	NA	NA	NA	NA	NA	NA	NA	NA	NA	NA	NA	NA	NA	NA	NA	NA	NA	NA
12	Guerrero	001	Acapulco de Juárez	0078	Aguas Calientes	0993826	165033	0032	Pavimentada	Conexa a carretera	Micro, combi o camioneta	Más de 1 y hasta 1.5 horas	Más de 60 salidas	De 15 a 19 pesos	Sin hablantes de lengua indígena	Sin hablantes de lengua indígena	Sin hablantes de lengua indígena	Sin hablantes de lengua indígena	Sin hablantes de lengua indígena	Sin hablantes de lengua indígena	Sin hablantes de lengua indígena	Insuficientemente especificado del sector construcción	Agricultura	NE	SI	SI	SI	SI	SI	Alcoholismo o drogadicción	NO	Red de agua no disponible	NO	Red de drenaje no disponible	NO	NO	No hay recolección	SI	SI	NO	NO	SI	SI	SI	SI	SI	NO	NO	SI
12	Guerrero	001	Acapulco de Juárez	0079	Alto del Camarón	0993454	170305	0220	Pavimentada	Conexa a carretera	No hay transporte	No hay transporte	No hay transporte	No hay transporte	Sin hablantes de lengua indígena	Sin hablantes de lengua indígena	Sin hablantes de lengua indígena	Sin hablantes de lengua indígena	Sin hablantes de lengua indígena	Sin hablantes de lengua indígena	Sin hablantes de lengua indígena	Agricultura	Cría y explotación de animales	Insuficientemente especificado del sector industria manufacturera	SI	NO	NO	NO	NO	Falta de otros servicios o equipamiento	SI	Disponible con cobro	NO	Red de drenaje no disponible	NE	SI	Queman la basura	SI	SI	SI	SI	SI	SI	SI	NO	SI	NO	NO	SI
12	Guerrero	001	Acapulco de Juárez	0080	Amatepec	0993029	165849	0360	Terracería	Conexa a carretera	No hay transporte	No hay transporte	No hay transporte	No hay transporte	Sin hablantes de lengua indígena	Sin hablantes de lengua indígena	Sin hablantes de lengua indígena	Sin hablantes de lengua indígena	Sin hablantes de lengua indígena	Sin hablantes de lengua indígena	Sin hablantes de lengua indígena	Agricultura	Cría y explotación de animales	NE	NO	NO	NO	NO	NO	Falta de empleo o emigración	NO	Red de agua no disponible	NO	Red de drenaje no disponible	NO	NO	No hay recolección	SI	NO	SI	NO	SI	NO	SI	SI	SI	NO	NO	SI
12	Guerrero	001	Acapulco de Juárez	0081	Amatillo	0993958	164913	0039	Pavimentada	Conexa a carretera	Micro, combi o camioneta	Más de 1 y hasta 1.5 horas	De 31 a 60 salidas al día	De 15 a 19 pesos	Sin hablantes de lengua indígena	Sin hablantes de lengua indígena	Sin hablantes de lengua indígena	Sin hablantes de lengua indígena	Sin hablantes de lengua indígena	Sin hablantes de lengua indígena	Sin hablantes de lengua indígena	Insuficientemente especificado del sector construcción	Agricultura	Insuficientemente especificado del sector comercio al por menor	SI	NO	SI	SI	SI	Contaminación ambiental	SI	Disponible sin cobro	NO	Red de drenaje no disponible	NO	NO	No hay recolección	NE	NE	NE	NE	NE	NE	SI	NE	NE	NE	NE	NE
12	Guerrero	001	Acapulco de Juárez	0082	Apalani	0993522	165113	0162	Terracería	Conexa a carretera	No hay transporte	No hay transporte	No hay transporte	No hay transporte	Con hablantes de lengua indígena	Náhuatl	SI	NE	NE	NE	NE	Agricultura	Otras industrias manufactureras	NE	NO	NO	SI	NO	SI	Falta de infraestructura o servicio de agua	NO	Red de agua no disponible	NO	Red de drenaje no disponible	NO	NO	No hay recolección	SI	NO	SI	NO	SI	NO	NO	SI	NO	NO	NO	NO
12	Guerrero	001	Acapulco de Juárez	0083	Apanhuac (Apanguaque)	0993520	165448	0119	Terracería	Conexa a carretera	No hay transporte	No hay transporte	No hay transporte	No hay transporte	Sin hablantes de lengua indígena	Sin hablantes de lengua indígena	Sin hablantes de lengua indígena	Sin hablantes de lengua indígena	Sin hablantes de lengua indígena	Sin hablantes de lengua indígena	Sin hablantes de lengua indígena	Agricultura	Cría y explotación de animales	NE	SI	SI	NO	NO	NO	Falta de infraestructura o servicio de agua	NO	Red de agua no disponible	NO	Red de drenaje no disponible	NE	NO	No hay recolección	SI	NO	SI	NO	SI	NO	SI	NO	NO	NO	NO	SI
12	Guerrero	001	Acapulco de Juárez	0085	Barra Vieja	0993736	164129	0005	Pavimentada	Conexa a carretera	No hay transporte	No hay transporte	No hay transporte	No hay transporte	Sin hablantes de lengua indígena	Sin hablantes de lengua indígena	Sin hablantes de lengua indígena	Sin hablantes de lengua indígena	Sin hablantes de lengua indígena	Sin hablantes de lengua indígena	Sin hablantes de lengua indígena	Insuficientemente especificado del sector comercio al por menor	Pesca	NE	NO	NO	NO	NO	NO	Delincuencia o inseguridad	NO	Red de agua no disponible	NO	Red de drenaje no disponible	NE	SI	Destino NE	SI	NO	NO	SI	SI	SI	NO	NO	NO	SI	NO	SI
12	Guerrero	001	Acapulco de Juárez	0086	Barrio Nuevo de los Muertos	0993238	165334	0220	No conexa a carretera	Distancia NE	No hay transporte	No hay transporte	No hay transporte	No hay transporte	Sin hablantes de lengua indígena	Sin hablantes de lengua indígena	Sin hablantes de lengua indígena	Sin hablantes de lengua indígena	Sin hablantes de lengua indígena	Sin hablantes de lengua indígena	Sin hablantes de lengua indígena	Agricultura	Cría y explotación de animales	NE	NO	NO	NO	NO	NO	Falta de empleo o emigración	NO	Red de agua no disponible	NO	Red de drenaje no disponible	NE	NO	No hay recolección	SI	NO	NO	NO	SI	NO	NO	NO	NO	NO	NO	NO
12	Guerrero	001	Acapulco de Juárez	0087	El Bejuco	0994225	164927	0017	Pavimentada	Conexa a carretera	Micro, combi o camioneta	Más de 1 y hasta 1.5 horas	Más de 60 salidas	De 20 a 24 pesos	Con hablantes de lengua indígena	Náhuatl	SI	NO	NO	NO	NO	Insuficientemente especificado del sector construcción	Cría y explotación de animales	Compañías y grupos de espectáculos artísticos	NO	NO	SI	NO	SI	Sequía, inundaciones o clima adverso	SI	Disponible con cobro	NO	Red de drenaje no disponible	NO	NO	No hay recolección	SI	NO	NO	NO	SI	SI	NO	SI	SI	NO	SI	SI
12	Guerrero	001	Acapulco de Juárez	0088	Cacahuatepec	0993643	165311	0044	Terracería	Conexa a carretera	No hay transporte	No hay transporte	No hay transporte	No hay transporte	Sin hablantes de lengua indígena	Sin hablantes de lengua indígena	Sin hablantes de lengua indígena	Sin hablantes de lengua indígena	Sin hablantes de lengua indígena	Sin hablantes de lengua indígena	Sin hablantes de lengua indígena	Agricultura	Cría y explotación de animales	Insuficientemente especificado del sector construcción	SI	NO	SI	NO	SI	Falta de empleo o emigración	SI	Disponible sin cobro	NO	Red de drenaje no disponible	NO	NO	No hay recolección	SI	NO	SI	SI	SI	SI	SI	SI	SI	NO	NO	NO
12	Guerrero	001	Acapulco de Juárez	0089	La Calera	0994120	170252	0673	Pavimentada	Conexa a carretera	Taxi	Más de 1 y hasta 1.5 horas	De 21 a 30 salidas al día	De 10 a 14 pesos	Sin hablantes de lengua indígena	Sin hablantes de lengua indígena	Sin hablantes de lengua indígena	Sin hablantes de lengua indígena	Sin hablantes de lengua indígena	Sin hablantes de lengua indígena	Sin hablantes de lengua indígena	Agricultura	Cría y explotación de animales	NE	NO	NO	NO	NO	NO	Falta de infraestructura o servicio de agua	SI	Disponible sin cobro	NO	Red de drenaje no disponible	SI	NO	Destino NE	SI	SI	SI	NO	SI	NO	NO	SI	SI	NO	NO	SI
12	Guerrero	001	Acapulco de Juárez	0090	Campanario	0993417	165006	0160	Terracería	Conexa a carretera	No hay transporte	No hay transporte	No hay transporte	No hay transporte	Sin hablantes de lengua indígena	Sin hablantes de lengua indígena	Sin hablantes de lengua indígena	Sin hablantes de lengua indígena	Sin hablantes de lengua indígena	Sin hablantes de lengua indígena	Sin hablantes de lengua indígena	Agricultura	Comercio al por menor de vehículos de motor, refacciones, combustibles y lubricantes	NE	NO	SI	SI	NO	SI	Falta de infraestructura o servicio de agua	NO	Red de agua no disponible	NO	Red de drenaje no disponible	NO	NO	No hay recolección	SI	NO	SI	NO	SI	NO	SI	SI	NO	NO	NO	NO
12	Guerrero	001	Acapulco de Juárez	0091	El Cantón	0993550	165338	0178	Terracería	Conexa a carretera	No hay transporte	No hay transporte	No hay transporte	No hay transporte	Sin hablantes de lengua indígena	Sin hablantes de lengua indígena	Sin hablantes de lengua indígena	Sin hablantes de lengua indígena	Sin hablantes de lengua indígena	Sin hablantes de lengua indígena	Sin hablantes de lengua indígena	Agricultura	Insuficientemente especificado del sector construcción	NE	NO	SI	NO	NO	SI	Falta de equipamiento o servicios de salud	SI	Disponible con cobro	NO	Red de drenaje no disponible	SI	NO	Destino NE	SI	NO	SI	SI	SI	NO	SI	NO	NO	NO	NO	SI
12	Guerrero	001	Acapulco de Juárez	0092	Carabalí	0995245	165352	0420	Terracería	Conexa a carretera	Micro, combi o camioneta	De 30 a 60 min	De 6 a 10 salidas al día	De 3 a 6 pesos	Sin hablantes de lengua indígena	Sin hablantes de lengua indígena	Sin hablantes de lengua indígena	Sin hablantes de lengua indígena	Sin hablantes de lengua indígena	Sin hablantes de lengua indígena	Sin hablantes de lengua indígena	Agricultura	Administración pública municipal	NE	SI	NO	NO	NO	SI	Falta de carretera o transporte	NO	Red de agua no disponible	NO	Red de drenaje no disponible	NO	SI	Depositan la basura a cielo abierto	SI	NO	SI	SI	SI	SI	NO	NO	SI	NO	NO	SI
12	Guerrero	001	Acapulco de Juárez	0093	El Carrizo	0993712	165217	0024	Terracería	Conexa a carretera	No hay transporte	No hay transporte	No hay transporte	No hay transporte	Sin hablantes de lengua indígena	Sin hablantes de lengua indígena	Sin hablantes de lengua indígena	Sin hablantes de lengua indígena	Sin hablantes de lengua indígena	Sin hablantes de lengua indígena	Sin hablantes de lengua indígena	Agricultura	Insuficientemente especificado del sector construcción	NE	NO	SI	SI	SI	NO	Falta de empleo o emigración	NA	NA	NA	NA	NA	NA	NA	NA	NA	NA	NA	NA	NA	NA	NA	NA	NA	NA	NA
12	Guerrero	001	Acapulco de Juárez	0095	Cerro de Piedra	0993745	164634	0044	Pavimentada	Conexa a carretera	Micro, combi o camioneta	Más de 1 y hasta 1.5 horas	Más de 60 salidas	De 20 a 24 pesos	Sin hablantes de lengua indígena	Sin hablantes de lengua indígena	Sin hablantes de lengua indígena	Sin hablantes de lengua indígena	Sin hablantes de lengua indígena	Sin hablantes de lengua indígena	Sin hablantes de lengua indígena	Agricultura	Cría y explotación de animales	Insuficientemente especificado del sector construcción	SI	NO	NO	SI	SI	Falta de empleo o emigración	SI	Disponible con cobro	NO	Red de drenaje no disponible	NO	SI	Desalojan la basura a otro lugar	SI	NO	NO	SI	SI	NO	NO	SI	NO	NO	NO	NO
12	Guerrero	001	Acapulco de Juárez	0097	Colonia Guerrero (Los Guajes)	0993647	170225	0135	Pavimentada	Conexa a carretera	No hay transporte	No hay transporte	No hay transporte	No hay transporte	Sin hablantes de lengua indígena	Sin hablantes de lengua indígena	Sin hablantes de lengua indígena	Sin hablantes de lengua indígena	Sin hablantes de lengua indígena	Sin hablantes de lengua indígena	Sin hablantes de lengua indígena	Agricultura	Cría y explotación de animales	NE	NO	NO	NO	NO	NO	Falta de infraestructura o servicio de agua	NO	Red de agua no disponible	NO	Red de drenaje no disponible	NO	SI	Desalojan la basura a otro lugar	SI	SI	SI	NO	SI	NO	NO	SI	SI	NO	NO	SI
12	Guerrero	001	Acapulco de Juárez	0098	La Concepción	0993911	165250	0098	Pavimentada	Conexa a carretera	No hay transporte	No hay transporte	No hay transporte	No hay transporte	Sin hablantes de lengua indígena	Sin hablantes de lengua indígena	Sin hablantes de lengua indígena	Sin hablantes de lengua indígena	Sin hablantes de lengua indígena	Sin hablantes de lengua indígena	Sin hablantes de lengua indígena	Agricultura	Cría y explotación de animales	Insuficientemente especificado del sector construcción	SI	SI	SI	NO	NO	Falta de empleo o emigración	SI	Disponible con cobro	NO	Red de drenaje no disponible	NO	NO	No hay recolección	SI	SI	SI	NO	SI	SI	NO	SI	NO	NO	NO	SI
12	Guerrero	001	Acapulco de Juárez	0099	Las Cruces de Cacahuatepec	0993658	165050	0131	Terracería	Conexa a carretera	No hay transporte	No hay transporte	No hay transporte	No hay transporte	Sin hablantes de lengua indígena	Sin hablantes de lengua indígena	Sin hablantes de lengua indígena	Sin hablantes de lengua indígena	Sin hablantes de lengua indígena	Sin hablantes de lengua indígena	Sin hablantes de lengua indígena	Agricultura	Cría y explotación de animales	NE	NO	SI	SI	NO	NO	Falta de infraestructura o servicio de agua	NO	Red de agua no disponible	NO	Red de drenaje no disponible	SI	NO	Destino NE	SI	NO	NO	NO	SI	NO	SI	SI	NO	NO	NO	NO
12	Guerrero	001	Acapulco de Juárez	0101	Dos Arroyos	0993855	170116	0220	Pavimentada	Conexa a carretera	No hay transporte	No hay transporte	No hay transporte	No hay transporte	Sin hablantes de lengua indígena	Sin hablantes de lengua indígena	Sin hablantes de lengua indígena	Sin hablantes de lengua indígena	Sin hablantes de lengua indígena	Sin hablantes de lengua indígena	Sin hablantes de lengua indígena	Agricultura	Cría y explotación de animales	NE	SI	NO	NO	NO	NO	Otra clase de problema	SI	Disponible con cobro	SI	Disponible con desalojo a otro lugar	NO	SI	Queman la basura	SI	SI	SI	NO	SI	NO	SI	NO	SI	NO	NO	SI
12	Guerrero	001	Acapulco de Juárez	0102	Ejido Nuevo	0994408	165830	0240	Pavimentada	Conexa a carretera	No hay transporte	No hay transporte	No hay transporte	No hay transporte	Sin hablantes de lengua indígena	Sin hablantes de lengua indígena	Sin hablantes de lengua indígena	Sin hablantes de lengua indígena	Sin hablantes de lengua indígena	Sin hablantes de lengua indígena	Sin hablantes de lengua indígena	Agricultura	Cría y explotación de animales	Insuficientemente especificado del sector comercio al por menor	NO	NO	NO	NO	NO	Falta de infraestructura o servicio de agua	SI	Disponible con cobro	NO	Red de drenaje no disponible	NO	SI	Entierran la basura	NO	NO	SI	SI	SI	SI	SI	NO	SI	SI	NO	SI
12	Guerrero	001	Acapulco de Juárez	0103	Espinalillo	0993524	165356	0200	Terracería	Conexa a carretera	No hay transporte	No hay transporte	No hay transporte	No hay transporte	Sin hablantes de lengua indígena	Sin hablantes de lengua indígena	Sin hablantes de lengua indígena	Sin hablantes de lengua indígena	Sin hablantes de lengua indígena	Sin hablantes de lengua indígena	Sin hablantes de lengua indígena	Agricultura	Cría y explotación de animales	NE	NO	NO	NO	NO	NO	Falta de empleo o emigración	NE	Disponibilidad de red de agua NE	NE	Disponibilidad NE	NE	NE	Recolección y limpieza NE	NE	NE	NE	NE	NE	NE	NE	NE	NE	NE	NE	NE
12	Guerrero	001	Acapulco de Juárez	0104	La Estación	0993958	164603	0035	Pavimentada	Conexa a carretera	Micro, combi o camioneta	Más de 1 y hasta 1.5 horas	De 6 a 10 salidas al día	De 20 a 24 pesos	Sin hablantes de lengua indígena	Sin hablantes de lengua indígena	Sin hablantes de lengua indígena	Sin hablantes de lengua indígena	Sin hablantes de lengua indígena	Sin hablantes de lengua indígena	Sin hablantes de lengua indígena	Pesca	Agricultura	NE	NO	NO	NO	NO	NO	Falta de infraestructura o servicio de agua	NO	Red de agua no disponible	NO	Red de drenaje no disponible	NO	SI	Destino NE	SI	SI	SI	NO	SI	NO	SI	NO	NO	NO	NO	SI
12	Guerrero	001	Acapulco de Juárez	0105	Garrapatas	0993941	165514	0236	Terracería	Conexa a carretera	No hay transporte	No hay transporte	No hay transporte	No hay transporte	Sin hablantes de lengua indígena	Sin hablantes de lengua indígena	Sin hablantes de lengua indígena	Sin hablantes de lengua indígena	Sin hablantes de lengua indígena	Sin hablantes de lengua indígena	Sin hablantes de lengua indígena	Agricultura	Aprovechamiento forestal	NE	SI	NO	NO	NO	NO	Irregularidad o disputa relacionada con la tenencia de la tierra	SI	Disponible sin cobro	NO	Red de drenaje no disponible	NO	NO	No hay recolección	SI	SI	SI	NO	SI	SI	NO	NO	NO	NO	NO	SI
12	Guerrero	001	Acapulco de Juárez	0106	Huajintepec	0993112	165823	0359	Terracería	Conexa a carretera	No hay transporte	No hay transporte	No hay transporte	No hay transporte	Sin hablantes de lengua indígena	Sin hablantes de lengua indígena	Sin hablantes de lengua indígena	Sin hablantes de lengua indígena	Sin hablantes de lengua indígena	Sin hablantes de lengua indígena	Sin hablantes de lengua indígena	Agricultura	Cría y explotación de animales	NE	NO	NO	NO	NO	NO	Falta de empleo o emigración	SI	Disponible con cobro	NO	Red de drenaje no disponible	NO	NO	No hay recolección	SI	NO	NO	NO	SI	NO	NO	NO	SI	NO	NE	SI
12	Guerrero	001	Acapulco de Juárez	0107	Huamuchitos	0993446	165339	0159	Terracería	Conexa a carretera	No hay transporte	No hay transporte	No hay transporte	No hay transporte	Con hablantes de lengua indígena	Náhuatl	SI	NE	NE	NE	NE	Agricultura	Cría y explotación de animales	NE	SI	NO	NO	NO	SI	Falta de empleo o emigración	NO	Red de agua no disponible	NO	Red de drenaje no disponible	NE	NO	No hay recolección	NO	NO	SI	NO	SI	NO	SI	NO	NO	NO	NO	SI
12	Guerrero	001	Acapulco de Juárez	0108	Los Álamos	0993718	165346	0043	Terracería	Conexa a carretera	No hay transporte	No hay transporte	No hay transporte	No hay transporte	Sin hablantes de lengua indígena	Sin hablantes de lengua indígena	Sin hablantes de lengua indígena	Sin hablantes de lengua indígena	Sin hablantes de lengua indígena	Sin hablantes de lengua indígena	Sin hablantes de lengua indígena	Agricultura	Insuficientemente especificado del sector construcción	Cría y explotación de animales	NO	NO	SI	NO	SI	Falta de empleo o emigración	NA	NA	NA	NA	NA	NA	NA	NA	NA	NA	NA	NA	NA	NA	NA	NA	NA	NA	NA
12	Guerrero	001	Acapulco de Juárez	0109	Kilómetro 21	0994812	165709	0059	Pavimentada	Conexa a carretera	Taxi	De 30 a 60 min	De 1 a 5 salidas al día	De 10 a 14 pesos	Sin hablantes de lengua indígena	Sin hablantes de lengua indígena	Sin hablantes de lengua indígena	Sin hablantes de lengua indígena	Sin hablantes de lengua indígena	Sin hablantes de lengua indígena	Sin hablantes de lengua indígena	Agricultura	Trabajos de albañilería de instalaciones hidrosanitarias y eléctricas y de trabajos en exteriores	NE	NO	NO	NO	NO	SI	Falta de infraestructura o servicio de agua	SI	Disponible con cobro	NO	Red de drenaje no disponible	NO	NO	No hay recolección	SI	SI	SI	NO	SI	SI	SI	SI	NO	SI	NO	SI
12	Guerrero	001	Acapulco de Juárez	0111	Kilómetro 34	0994738	170131	0350	Pavimentada	Conexa a carretera	No hay transporte	No hay transporte	No hay transporte	No hay transporte	Sin hablantes de lengua indígena	Sin hablantes de lengua indígena	Sin hablantes de lengua indígena	Sin hablantes de lengua indígena	Sin hablantes de lengua indígena	Sin hablantes de lengua indígena	Sin hablantes de lengua indígena	Agricultura	NE	NE	NO	NO	NO	NO	NO	Falta de empleo o emigración	NE	Disponibilidad de red de agua NE	NE	Disponibilidad NE	NE	NE	Recolección y limpieza NE	NE	NE	NE	NE	NE	NE	NE	NE	NE	NE	NE	NE
12	Guerrero	001	Acapulco de Juárez	0112	Kilómetro 39	0994642	170235	0401	Pavimentada	Conexa a carretera	No hay transporte	No hay transporte	No hay transporte	No hay transporte	Sin hablantes de lengua indígena	Sin hablantes de lengua indígena	Sin hablantes de lengua indígena	Sin hablantes de lengua indígena	Sin hablantes de lengua indígena	Sin hablantes de lengua indígena	Sin hablantes de lengua indígena	Agricultura	NE	NE	NO	NO	NO	NO	SI	Falta de empleo o emigración	NO	Red de agua no disponible	NO	Red de drenaje no disponible	NO	NO	No hay recolección	SI	SI	NO	NO	SI	SI	NO	NO	NO	NO	NO	SI
12	Guerrero	001	Acapulco de Juárez	0113	Kilómetro 40	0994614	170258	0399	Pavimentada	Conexa a carretera	Micro, combi o camioneta	De 30 a 60 min	De 1 a 5 salidas al día	De 20 a 24 pesos	Sin hablantes de lengua indígena	Sin hablantes de lengua indígena	Sin hablantes de lengua indígena	Sin hablantes de lengua indígena	Sin hablantes de lengua indígena	Sin hablantes de lengua indígena	Sin hablantes de lengua indígena	Agricultura	NE	NE	NO	NO	NO	SI	SI	Delincuencia o inseguridad	NO	Red de agua no disponible	NO	Red de drenaje no disponible	SI	NO	Destino NE	SI	SI	NO	NO	SI	SI	NO	NO	NO	NO	NO	NO
12	Guerrero	001	Acapulco de Juárez	0114	Kilómetro 42 (Juan N. Álvarez)	0994535	170318	0417	Pavimentada	Conexa a carretera	No hay transporte	No hay transporte	No hay transporte	No hay transporte	Sin hablantes de lengua indígena	Sin hablantes de lengua indígena	Sin hablantes de lengua indígena	Sin hablantes de lengua indígena	Sin hablantes de lengua indígena	Sin hablantes de lengua indígena	Sin hablantes de lengua indígena	Insuficientemente especificado del sector industria manufacturera	NE	NE	SI	NO	NO	SI	SI	Falta de equipamiento o servicios de salud	NO	Red de agua no disponible	NO	Red de drenaje no disponible	NO	SI	Destino NE	SI	SI	SI	SI	SI	SI	NO	NO	SI	NO	NO	SI
12	Guerrero	001	Acapulco de Juárez	0115	Kilómetro 45	0994502	170415	0472	Pavimentada	Conexa a carretera	No hay transporte	No hay transporte	No hay transporte	No hay transporte	Sin hablantes de lengua indígena	Sin hablantes de lengua indígena	Sin hablantes de lengua indígena	Sin hablantes de lengua indígena	Sin hablantes de lengua indígena	Sin hablantes de lengua indígena	Sin hablantes de lengua indígena	Agricultura	Insuficientemente especificado del sector industria manufacturera	Cría y explotación de animales	NO	NO	NO	NO	NO	Pobreza o marginación	SI	Disponible con cobro	NO	Red de drenaje no disponible	SI	NO	Destino NE	SI	SI	NO	NO	SI	SI	NO	NO	SI	NO	NO	SI
12	Guerrero	001	Acapulco de Juárez	0116	Kilómetro Cuarenta y Ocho	0994346	170502	0481	Pavimentada	Conexa a carretera	Taxi	Más de 1 y hasta 1.5 horas	De 21 a 30 salidas al día	De 30 a 34 pesos	Sin hablantes de lengua indígena	Sin hablantes de lengua indígena	Sin hablantes de lengua indígena	Sin hablantes de lengua indígena	Sin hablantes de lengua indígena	Sin hablantes de lengua indígena	Sin hablantes de lengua indígena	Agricultura	Cría y explotación de animales	NE	NO	NO	NO	NO	NO	Pobreza o marginación	NA	NA	NA	NA	NA	NA	NA	NA	NA	NA	NA	NA	NA	NA	NA	NA	NA	NA	NA
12	Guerrero	001	Acapulco de Juárez	0117	Laguna del Quemado	0993951	164520	0037	Pavimentada	Conexa a carretera	Micro, combi o camioneta	Más de 1 y hasta 1.5 horas	De 6 a 10 salidas al día	De 7 a 9 pesos	Sin hablantes de lengua indígena	Sin hablantes de lengua indígena	Sin hablantes de lengua indígena	Sin hablantes de lengua indígena	Sin hablantes de lengua indígena	Sin hablantes de lengua indígena	Sin hablantes de lengua indígena	Pesca	Agricultura	NE	NO	NO	NO	NO	NO	Falta de infraestructura o servicio de agua	NO	Red de agua no disponible	NO	Red de drenaje no disponible	NE	NO	No hay recolección	SI	NO	SI	NO	SI	SI	NO	SI	SI	NO	NO	NO
12	Guerrero	001	Acapulco de Juárez	0119	Lomas del Aire	0995157	165722	0383	Terracería	Conexa a carretera	Micro, combi o camioneta	De 30 a 60 min	De 6 a 10 salidas al día	De 10 a 14 pesos	Sin hablantes de lengua indígena	Sin hablantes de lengua indígena	Sin hablantes de lengua indígena	Sin hablantes de lengua indígena	Sin hablantes de lengua indígena	Sin hablantes de lengua indígena	Sin hablantes de lengua indígena	Agricultura	Cría y explotación de animales	NE	SI	NO	NO	NO	SI	Alcoholismo o drogadicción	NO	Red de agua no disponible	NO	Red de drenaje no disponible	NO	NO	No hay recolección	SI	SI	NO	NO	SI	SI	NO	SI	NO	NO	NO	SI
12	Guerrero	001	Acapulco de Juárez	0120	Loma Larga	0995204	170016	0455	Terracería	Conexa a carretera	Micro, combi o camioneta	Más de 1 y hasta 1.5 horas	De 11 a 20 salidas al día	De 25 a 29 pesos	Sin hablantes de lengua indígena	Sin hablantes de lengua indígena	Sin hablantes de lengua indígena	Sin hablantes de lengua indígena	Sin hablantes de lengua indígena	Sin hablantes de lengua indígena	Sin hablantes de lengua indígena	Agricultura	NE	NE	NO	NO	NO	NO	NO	Falta de otros servicios o equipamiento	NA	NA	NA	NA	NA	NA	NA	NA	NA	NA	NA	NA	NA	NA	NA	NA	NA	NA	NA
12	Guerrero	001	Acapulco de Juárez	0121	Lomas de Chapultepec	0993635	164254	0020	Pavimentada	Conexa a carretera	Micro, combi o camioneta	De 30 a 60 min	Más de 60 salidas	De 10 a 14 pesos	Sin hablantes de lengua indígena	Sin hablantes de lengua indígena	Sin hablantes de lengua indígena	Sin hablantes de lengua indígena	Sin hablantes de lengua indígena	Sin hablantes de lengua indígena	Sin hablantes de lengua indígena	Agricultura	NE	NE	SI	NO	SI	NO	NO	Pobreza o marginación	SI	Disponible con cobro	NO	Red de drenaje no disponible	NO	SI	Desalojan la basura a otro lugar	SI	SI	NO	NO	SI	SI	SI	NO	NO	NO	SI	SI
12	Guerrero	001	Acapulco de Juárez	0124	Las Marías	0994054	170334	0680	Pavimentada	Conexa a carretera	No hay transporte	No hay transporte	No hay transporte	No hay transporte	Sin hablantes de lengua indígena	Sin hablantes de lengua indígena	Sin hablantes de lengua indígena	Sin hablantes de lengua indígena	Sin hablantes de lengua indígena	Sin hablantes de lengua indígena	Sin hablantes de lengua indígena	Agricultura	Cría y explotación de animales	NE	SI	NO	NO	NO	SI	Pobreza o marginación	SI	Disponible con cobro	NO	Red de drenaje no disponible	NO	NO	No hay recolección	SI	SI	SI	NO	SI	NO	NO	SI	SI	NO	NO	SI
12	Guerrero	001	Acapulco de Juárez	0125	El Metlapil	0994456	165030	0025	Terracería	Conexa a carretera	No hay transporte	No hay transporte	No hay transporte	No hay transporte	Sin hablantes de lengua indígena	Sin hablantes de lengua indígena	Sin hablantes de lengua indígena	Sin hablantes de lengua indígena	Sin hablantes de lengua indígena	Sin hablantes de lengua indígena	Sin hablantes de lengua indígena	Agricultura	NE	NE	NO	NO	NO	NO	SI	Falta de infraestructura o servicio de agua	NO	Red de agua no disponible	NO	Red de drenaje no disponible	NO	NO	No hay recolección	SI	NO	NO	NO	SI	SI	NO	NO	NO	NO	NO	SI
12	Guerrero	001	Acapulco de Juárez	0126	Oaxaquillas	0993926	164926	0039	Pavimentada	Conexa a carretera	Micro, combi o camioneta	De 30 a 60 min	Más de 60 salidas	De 15 a 19 pesos	Sin hablantes de lengua indígena	Sin hablantes de lengua indígena	Sin hablantes de lengua indígena	Sin hablantes de lengua indígena	Sin hablantes de lengua indígena	Sin hablantes de lengua indígena	Sin hablantes de lengua indígena	Agricultura	Insuficientemente especificado del sector construcción	Agricultura	NO	NO	NO	NO	NO	Falta de infraestructura o servicio de agua	NO	Red de agua no disponible	NO	Red de drenaje no disponible	SI	NO	Destino NE	NO	NO	NO	NO	SI	SI	NO	NO	SI	NO	NO	SI
12	Guerrero	001	Acapulco de Juárez	0127	Las Ollitas (Las Joyitas)	0994305	165420	0140	Terracería	Conexa a carretera	No hay transporte	No hay transporte	No hay transporte	No hay transporte	Sin hablantes de lengua indígena	Sin hablantes de lengua indígena	Sin hablantes de lengua indígena	Sin hablantes de lengua indígena	Sin hablantes de lengua indígena	Sin hablantes de lengua indígena	Sin hablantes de lengua indígena	Agricultura	NE	NE	NO	NO	NO	NO	NO	Falta de otros servicios o equipamiento	NA	NA	NA	NA	NA	NA	NA	NA	NA	NA	NA	NA	NA	NA	NA	NA	NA	NA	NA
12	Guerrero	001	Acapulco de Juárez	0128	Los Órganos de Juan R. Escudero	0994840	165639	0100	Pavimentada	Conexa a carretera	Taxi	De 10 a 14 min	De 11 a 20 salidas al día	De 10 a 14 pesos	Sin hablantes de lengua indígena	Sin hablantes de lengua indígena	Sin hablantes de lengua indígena	Sin hablantes de lengua indígena	Sin hablantes de lengua indígena	Sin hablantes de lengua indígena	Sin hablantes de lengua indígena	Insuficientemente especificado del sector construcción	Administración pública municipal	NE	NO	NO	NO	SI	SI	Sin problema	SI	Disponible con cobro	NO	Red de drenaje no disponible	NO	SI	Desalojan la basura a otro lugar	SI	SI	NO	NO	SI	SI	SI	SI	NO	SI	SI	SI
12	Guerrero	001	Acapulco de Juárez	0129	Los Órganos de San Agustín (El Quemado)	0994925	165605	0050	Pavimentada	Conexa a carretera	Micro, combi o camioneta	De 30 a 60 min	De 31 a 60 salidas al día	De 3 a 6 pesos	Sin hablantes de lengua indígena	Sin hablantes de lengua indígena	Sin hablantes de lengua indígena	Sin hablantes de lengua indígena	Sin hablantes de lengua indígena	Sin hablantes de lengua indígena	Sin hablantes de lengua indígena	Transporte terrestre de pasajeros, excepto por ferrocarril	Insuficientemente especificado del sector construcción	NE	SI	NO	NO	SI	NO	Sequía, inundaciones o clima adverso	SI	Disponible con cobro	SI	Disponible con desalojo a un cuerpo de agua	NO	SI	Entierran la basura	SI	SI	SI	SI	SI	SI	NO	SI	NO	SI	SI	SI
12	Guerrero	001	Acapulco de Juárez	0130	Pablo Galeana (Coacoyular)	0994148	170834	0733	Terracería	Conexa a carretera	No hay transporte	No hay transporte	No hay transporte	No hay transporte	Sin hablantes de lengua indígena	Sin hablantes de lengua indígena	Sin hablantes de lengua indígena	Sin hablantes de lengua indígena	Sin hablantes de lengua indígena	Sin hablantes de lengua indígena	Sin hablantes de lengua indígena	Agricultura	Cría y explotación de animales	NE	NO	NO	NO	NO	NO	Sequía, inundaciones o clima adverso	NO	Red de agua no disponible	NO	Red de drenaje no disponible	NO	NO	No hay recolección	SI	SI	NO	NO	SI	NO	NO	NO	SI	NO	SI	SI
12	Guerrero	001	Acapulco de Juárez	0131	Las Parotas	0993731	165443	0079	Terracería	Conexa a carretera	No hay transporte	No hay transporte	No hay transporte	No hay transporte	Sin hablantes de lengua indígena	Sin hablantes de lengua indígena	Sin hablantes de lengua indígena	Sin hablantes de lengua indígena	Sin hablantes de lengua indígena	Sin hablantes de lengua indígena	Sin hablantes de lengua indígena	Agricultura	Cría y explotación de animales	NE	SI	NO	NO	NO	NO	Falta de empleo o emigración	NO	Red de agua no disponible	NO	Red de drenaje no disponible	SI	NO	Destino NE	NO	NO	SI	NO	SI	NO	NO	SI	SI	NO	NO	NO
12	Guerrero	001	Acapulco de Juárez	0132	Parotillas	0993714	165234	0057	Terracería	Conexa a carretera	No hay transporte	No hay transporte	No hay transporte	No hay transporte	Sin hablantes de lengua indígena	Sin hablantes de lengua indígena	Sin hablantes de lengua indígena	Sin hablantes de lengua indígena	Sin hablantes de lengua indígena	Sin hablantes de lengua indígena	Sin hablantes de lengua indígena	Agricultura	Insuficientemente especificado del sector construcción	Cría y explotación de animales	NO	SI	SI	NO	NO	Falta de empleo o emigración	SI	Disponible sin cobro	NO	Red de drenaje no disponible	NO	NO	No hay recolección	SI	NO	SI	NO	SI	NO	NO	NO	NO	NO	NO	NO
12	Guerrero	001	Acapulco de Juárez	0135	El Pelillo	0995210	165931	0359	Terracería	Conexa a carretera	No hay transporte	No hay transporte	No hay transporte	No hay transporte	Sin hablantes de lengua indígena	Sin hablantes de lengua indígena	Sin hablantes de lengua indígena	Sin hablantes de lengua indígena	Sin hablantes de lengua indígena	Sin hablantes de lengua indígena	Sin hablantes de lengua indígena	Agricultura	NE	NE	NO	NO	NO	NO	NO	Falta de infraestructura o servicio de agua	NE	Disponibilidad de red de agua NE	NE	Disponibilidad NE	NE	NE	Recolección y limpieza NE	NE	NE	NE	NE	NE	NE	NE	NE	NE	NE	NE	NE
12	Guerrero	001	Acapulco de Juárez	0137	Piedra Imán	0994701	170437	0686	Pavimentada	Conexa a carretera	Taxi	De 30 a 60 min	Sin salidas diarias	De 20 a 24 pesos	Sin hablantes de lengua indígena	Sin hablantes de lengua indígena	Sin hablantes de lengua indígena	Sin hablantes de lengua indígena	Sin hablantes de lengua indígena	Sin hablantes de lengua indígena	Sin hablantes de lengua indígena	Agricultura	Cría y explotación de animales	NE	NO	SI	NO	NO	SI	Falta de infraestructura o servicio de agua	SI	Disponible con cobro	NO	Red de drenaje no disponible	SI	NO	Destino NE	SI	SI	NO	SI	SI	SI	SI	NO	SI	NO	NO	SI
12	Guerrero	001	Acapulco de Juárez	0140	Playones de San Isidro	0994535	165347	0044	No conexa a carretera	Distancia NE	No hay transporte	No hay transporte	No hay transporte	No hay transporte	Sin hablantes de lengua indígena	Sin hablantes de lengua indígena	Sin hablantes de lengua indígena	Sin hablantes de lengua indígena	Sin hablantes de lengua indígena	Sin hablantes de lengua indígena	Sin hablantes de lengua indígena	Agricultura	Cría y explotación de animales	Insuficientemente especificado del sector construcción	NO	NO	NO	NO	NO	Falta de otros servicios o equipamiento	SI	Disponible con cobro	NO	Red de drenaje no disponible	NO	SI	Destino NE	SI	SI	SI	NO	NO	SI	NO	NO	NO	NO	NO	SI
12	Guerrero	001	Acapulco de Juárez	0141	Las Plazuelas	0994708	165227	0039	Pavimentada	Conexa a carretera	No hay transporte	No hay transporte	No hay transporte	No hay transporte	Sin hablantes de lengua indígena	Sin hablantes de lengua indígena	Sin hablantes de lengua indígena	Sin hablantes de lengua indígena	Sin hablantes de lengua indígena	Sin hablantes de lengua indígena	Sin hablantes de lengua indígena	Agricultura	Cría y explotación de animales	Insuficientemente especificado del sector construcción	NO	SI	SI	NO	NO	Pobreza o marginación	NO	Red de agua no disponible	NO	Red de drenaje no disponible	NO	SI	Desalojan la basura a otro lugar	SI	SI	SI	NO	SI	SI	NO	NO	NO	NO	NO	SI
12	Guerrero	001	Acapulco de Juárez	0142	Pochotlaxco	0993825	165651	0058	Terracería	Conexa a carretera	No hay transporte	No hay transporte	No hay transporte	No hay transporte	Sin hablantes de lengua indígena	Sin hablantes de lengua indígena	Sin hablantes de lengua indígena	Sin hablantes de lengua indígena	Sin hablantes de lengua indígena	Sin hablantes de lengua indígena	Sin hablantes de lengua indígena	Agricultura	Insuficientemente especificado del sector construcción	NE	NO	NO	NO	NO	NO	Falta de empleo o emigración	NA	NA	NA	NA	NA	NA	NA	NA	NA	NA	NA	NA	NA	NA	NA	NA	NA	NA	NA
12	Guerrero	001	Acapulco de Juárez	0143	La Providencia	0994902	170550	0739	Pavimentada	Conexa a carretera	No hay transporte	No hay transporte	No hay transporte	No hay transporte	Sin hablantes de lengua indígena	Sin hablantes de lengua indígena	Sin hablantes de lengua indígena	Sin hablantes de lengua indígena	Sin hablantes de lengua indígena	Sin hablantes de lengua indígena	Sin hablantes de lengua indígena	Agricultura	Cría y explotación de animales	Insuficientemente especificado del sector industria manufacturera	NO	NO	NO	NO	NO	Falta de empleo o emigración	SI	Disponible con cobro	NO	Red de drenaje no disponible	SI	SI	Destino NE	SI	SI	NO	NO	SI	SI	NO	NO	NO	NO	NO	SI
12	Guerrero	001	Acapulco de Juárez	0144	Pueblo Madero (El Playón)	0994021	170734	0420	Pavimentada	Conexa a carretera	No hay transporte	No hay transporte	No hay transporte	No hay transporte	Sin hablantes de lengua indígena	Sin hablantes de lengua indígena	Sin hablantes de lengua indígena	Sin hablantes de lengua indígena	Sin hablantes de lengua indígena	Sin hablantes de lengua indígena	Sin hablantes de lengua indígena	Agricultura	Cría y explotación de animales	NE	NO	NO	NO	NO	NO	Pobreza o marginación	NO	Red de agua no disponible	NO	Red de drenaje no disponible	NO	NO	No hay recolección	SI	SI	NO	NO	SI	NO	NO	NO	SI	NO	NO	SI
12	Guerrero	001	Acapulco de Juárez	0145	Pueblo Nuevo	0995447	165324	0611	Terracería	Conexa a carretera	No hay transporte	No hay transporte	No hay transporte	No hay transporte	Sin hablantes de lengua indígena	Sin hablantes de lengua indígena	Sin hablantes de lengua indígena	Sin hablantes de lengua indígena	Sin hablantes de lengua indígena	Sin hablantes de lengua indígena	Sin hablantes de lengua indígena	Insuficientemente especificado del sector construcción	Agricultura	NE	NO	NO	NO	NO	NO	Falta de carretera o transporte	NA	NA	NA	NA	NA	NA	NA	NA	NA	NA	NA	NA	NA	NA	NA	NA	NA	NA	NA
12	Guerrero	001	Acapulco de Juárez	0147	El Rincón	0993837	165150	0061	Terracería	Conexa a carretera	No hay transporte	No hay transporte	No hay transporte	No hay transporte	Sin hablantes de lengua indígena	Sin hablantes de lengua indígena	Sin hablantes de lengua indígena	Sin hablantes de lengua indígena	Sin hablantes de lengua indígena	Sin hablantes de lengua indígena	Sin hablantes de lengua indígena	Agricultura	Insuficientemente especificado del sector construcción	NE	NO	SI	SI	SI	SI	Delincuencia o inseguridad	SI	Disponible sin cobro	NO	Red de drenaje no disponible	SI	NO	Destino NE	SI	NO	SI	NO	SI	NO	NO	NO	NO	NO	NO	NO
12	Guerrero	001	Acapulco de Juárez	0149	Sabanillas	0994214	170003	0240	Pavimentada	Conexa a carretera	No hay transporte	No hay transporte	No hay transporte	No hay transporte	Sin hablantes de lengua indígena	Sin hablantes de lengua indígena	Sin hablantes de lengua indígena	Sin hablantes de lengua indígena	Sin hablantes de lengua indígena	Sin hablantes de lengua indígena	Sin hablantes de lengua indígena	Agricultura	Cría y explotación de animales	NE	SI	NO	SI	SI	SI	Falta de drenaje y alcantarillado	SI	Disponible con cobro	NO	Red de drenaje no disponible	NO	SI	Entierran la basura	SI	NO	SI	NO	SI	NO	NO	SI	SI	SI	NO	SI
12	Guerrero	001	Acapulco de Juárez	0150	Salsipuedes	0993800	165002	0035	Terracería	Conexa a carretera	Disponibilidad de transporte NE	Disponibilidad de transporte NE	Disponibilidad de transporte NE	Disponibilidad de transporte NE	Sin hablantes de lengua indígena	Sin hablantes de lengua indígena	Sin hablantes de lengua indígena	Sin hablantes de lengua indígena	Sin hablantes de lengua indígena	Sin hablantes de lengua indígena	Sin hablantes de lengua indígena	Agricultura	Insuficientemente especificado del sector construcción	NE	NO	NO	NO	NO	SI	Falta de infraestructura o servicio de agua	NO	Red de agua no disponible	NO	Red de drenaje no disponible	SI	NO	Destino NE	NO	NO	NO	NO	SI	SI	NO	NO	NO	NO	NO	SI
12	Guerrero	001	Acapulco de Juárez	0151	El Salto	0994548	165155	0017	Pavimentada	Conexa a carretera	No hay transporte	No hay transporte	No hay transporte	No hay transporte	Sin hablantes de lengua indígena	Sin hablantes de lengua indígena	Sin hablantes de lengua indígena	Sin hablantes de lengua indígena	Sin hablantes de lengua indígena	Sin hablantes de lengua indígena	Sin hablantes de lengua indígena	Agricultura	Cría y explotación de animales	Trabajos de albañilería de instalaciones hidrosanitarias y eléctricas y de trabajos en exteriores	NO	SI	SI	NO	SI	Alcoholismo o drogadicción	SI	Disponible con cobro	NO	Red de drenaje no disponible	SI	SI	Desalojan la basura a otro lugar	SI	SI	NO	SI	NO	SI	SI	NO	SI	NO	SI	SI
12	Guerrero	001	Acapulco de Juárez	0152	San Antonio	0993926	164804	0058	Pavimentada	Conexa a carretera	Micro, combi o camioneta	De 30 a 60 min	Más de 60 salidas	De 30 a 34 pesos	Sin hablantes de lengua indígena	Sin hablantes de lengua indígena	Sin hablantes de lengua indígena	Sin hablantes de lengua indígena	Sin hablantes de lengua indígena	Sin hablantes de lengua indígena	Sin hablantes de lengua indígena	Trabajos especializados para la construcción	Agricultura	NE	SI	NO	NO	SI	SI	Falta de infraestructura o servicio de agua	NO	Red de agua no disponible	NO	Red de drenaje no disponible	SI	SI	Destino NE	SI	SI	SI	NO	SI	SI	NO	NO	NO	NO	NO	SI
12	Guerrero	001	Acapulco de Juárez	0153	San Isidro Gallinero (El Gallinero)	0994251	165253	0075	Pavimentada	Conexa a carretera	No hay transporte	No hay transporte	No hay transporte	No hay transporte	Sin hablantes de lengua indígena	Sin hablantes de lengua indígena	Sin hablantes de lengua indígena	Sin hablantes de lengua indígena	Sin hablantes de lengua indígena	Sin hablantes de lengua indígena	Sin hablantes de lengua indígena	Agricultura	Cría y explotación de animales	Insuficientemente especificado del sector construcción	SI	SI	SI	NO	SI	Falta de empleo o emigración	SI	Disponible con cobro	NO	Red de drenaje no disponible	NO	NO	No hay recolección	SI	SI	SI	NO	SI	SI	SI	NO	NO	NO	NO	SI
12	Guerrero	001	Acapulco de Juárez	0154	San José Cacahuatepec	0994115	165551	0140	Terracería	Conexa a carretera	No hay transporte	No hay transporte	No hay transporte	No hay transporte	Sin hablantes de lengua indígena	Sin hablantes de lengua indígena	Sin hablantes de lengua indígena	Sin hablantes de lengua indígena	Sin hablantes de lengua indígena	Sin hablantes de lengua indígena	Sin hablantes de lengua indígena	Agricultura	Cría y explotación de animales	Aprovechamiento forestal	SI	NO	NO	NO	NO	Falta de otros servicios o equipamiento	NE	Disponibilidad de red de agua NE	NE	Disponibilidad NE	NE	NE	Recolección y limpieza NE	NE	NE	NE	NE	NE	NE	NE	NE	NE	NE	NE	NE
12	Guerrero	001	Acapulco de Juárez	0155	Lomas de San Juan	0994816	165903	0160	Pavimentada	Conexa a carretera	No hay transporte	No hay transporte	No hay transporte	No hay transporte	Sin hablantes de lengua indígena	Sin hablantes de lengua indígena	Sin hablantes de lengua indígena	Sin hablantes de lengua indígena	Sin hablantes de lengua indígena	Sin hablantes de lengua indígena	Sin hablantes de lengua indígena	Agricultura	Insuficientemente especificado del sector transportes	Insuficientemente especificado del sector industria manufacturera	SI	NO	NO	SI	SI	Alcoholismo o drogadicción	SI	Disponible con cobro	NO	Red de drenaje no disponible	NO	SI	Entierran la basura	SI	NO	NO	NO	SI	NO	NO	NO	NO	SI	NO	SI
12	Guerrero	001	Acapulco de Juárez	0156	San Martín el Jovero	0993536	170614	0323	Terracería	Conexa a carretera	No hay transporte	No hay transporte	No hay transporte	No hay transporte	Con hablantes de lengua indígena	Tlapaneco	SI	SI	SI	SI	SI	Agricultura	NE	NE	NO	NO	NO	NO	NO	Falta de carretera o transporte	NO	Red de agua no disponible	NO	Red de drenaje no disponible	NO	NO	No hay recolección	SI	SI	NO	NO	SI	NO	NO	NO	SI	NO	NO	NO
12	Guerrero	001	Acapulco de Juárez	0157	San Pedro Cacahuatepec	0994006	164854	0061	Pavimentada	Conexa a carretera	Micro, combi o camioneta	De 30 a 60 min	Más de 60 salidas	De 15 a 19 pesos	Sin hablantes de lengua indígena	Sin hablantes de lengua indígena	Sin hablantes de lengua indígena	Sin hablantes de lengua indígena	Sin hablantes de lengua indígena	Sin hablantes de lengua indígena	Sin hablantes de lengua indígena	Cría y explotación de animales	NE	NE	NO	NO	NO	SI	SI	Falta de drenaje y alcantarillado	SI	Disponible con cobro	NO	Red de drenaje no disponible	SI	SI	Destino NE	SI	NO	NO	NE	SI	SI	SI	NO	NO	NO	NO	SI
12	Guerrero	001	Acapulco de Juárez	0158	San Pedro las Playas	0994356	164926	0017	NDAI	NDAI	NDAI	NDAI	NDAI	NDAI	NDAI	NDAI	NDAI	NDAI	NDAI	NDAI	NDAI	NDAI	NDAI	NDAI	NDAI	NDAI	NDAI	NDAI	NDAI	No especificado	NDAI	NDAI	NDAI	NDAI	NDAI	NDAI	NDAI	NDAI	NDAI	NDAI	NDAI	NDAI	NDAI	NDAI	NDAI	NDAI	NDAI	NDAI	NDAI
12	Guerrero	001	Acapulco de Juárez	0160	La Sierrita	0994422	170320	0545	Terracería	Conexa a carretera	No hay transporte	No hay transporte	No hay transporte	No hay transporte	Sin hablantes de lengua indígena	Sin hablantes de lengua indígena	Sin hablantes de lengua indígena	Sin hablantes de lengua indígena	Sin hablantes de lengua indígena	Sin hablantes de lengua indígena	Sin hablantes de lengua indígena	Agricultura	Cría y explotación de animales	NE	NO	NO	NO	NO	NO	Falta de recursos económicos	SI	Disponible sin cobro	NO	Red de drenaje no disponible	NO	NO	No hay recolección	SI	SI	NO	NO	SI	NO	NO	NO	SI	NO	NO	SI
12	Guerrero	001	Acapulco de Juárez	0161	San José Tasajeras	0995115	170354	0654	Terracería	Conexa a carretera	No hay transporte	No hay transporte	No hay transporte	No hay transporte	Sin hablantes de lengua indígena	Sin hablantes de lengua indígena	Sin hablantes de lengua indígena	Sin hablantes de lengua indígena	Sin hablantes de lengua indígena	Sin hablantes de lengua indígena	Sin hablantes de lengua indígena	Agricultura	Cría y explotación de animales	NE	SI	NO	NO	NO	SI	Falta de recursos económicos	SI	Disponible con cobro	NO	Red de drenaje no disponible	SI	NO	Destino NE	SI	SI	NO	NO	SI	SI	NO	NO	NO	NO	NO	SI
12	Guerrero	001	Acapulco de Juárez	0162	Teniente José Azueta (Río Papagayo)	0993619	164633	0019	Pavimentada	Conexa a carretera	No hay transporte	No hay transporte	No hay transporte	No hay transporte	Sin hablantes de lengua indígena	Sin hablantes de lengua indígena	Sin hablantes de lengua indígena	Sin hablantes de lengua indígena	Sin hablantes de lengua indígena	Sin hablantes de lengua indígena	Sin hablantes de lengua indígena	Agricultura	Insuficientemente especificado del sector transportes	NE	NO	NO	NO	NO	NO	Falta de infraestructura o servicio de agua	NA	NA	NA	NA	NA	NA	NA	NA	NA	NA	NA	NA	NA	NA	NA	NA	NA	NA	NA
12	Guerrero	001	Acapulco de Juárez	0163	La Testaruda	0994705	165320	0036	No conexa a carretera	Distancia NE	Disponibilidad de transporte NE	Disponibilidad de transporte NE	Disponibilidad de transporte NE	Disponibilidad de transporte NE	Sin hablantes de lengua indígena	Sin hablantes de lengua indígena	Sin hablantes de lengua indígena	Sin hablantes de lengua indígena	Sin hablantes de lengua indígena	Sin hablantes de lengua indígena	Sin hablantes de lengua indígena	Agricultura	Trabajos de albañilería de instalaciones hidrosanitarias y eléctricas y de trabajos en exteriores	NE	SI	NO	NO	NO	NO	Falta de empleo o emigración	NO	Red de agua no disponible	NO	Red de drenaje no disponible	SI	NO	Destino NE	SI	SI	NO	NO	SI	NO	NO	NO	NO	NO	NO	SI
12	Guerrero	001	Acapulco de Juárez	0164	Texca	0994934	170041	0517	Pavimentada	Conexa a carretera	Micro, combi o camioneta	Más de 1 y hasta 1.5 horas	Frecuencia NE	De 20 a 24 pesos	NE	Hablantes de lengua indígena NE	Hablantes de lengua indígena NE	Hablantes de lengua indígena NE	Hablantes de lengua indígena NE	Hablantes de lengua indígena NE	Hablantes de lengua indígena NE	Agricultura	Trabajos de albañilería de instalaciones hidrosanitarias y eléctricas y de trabajos en exteriores	Comercio al por menor de vehículos de motor, refacciones, combustibles y lubricantes	NO	NO	NO	NO	NO	Falta de drenaje y alcantarillado	SI	Disponible con cobro	NO	Red de drenaje no disponible	NO	SI	Entierran la basura	SI	SI	SI	SI	SI	SI	SI	NO	SI	NO	NO	SI
12	Guerrero	001	Acapulco de Juárez	0165	Las Tortolitas	0994209	170702	0479	Pavimentada	Conexa a carretera	Disponibilidad de transporte NE	Disponibilidad de transporte NE	Disponibilidad de transporte NE	Disponibilidad de transporte NE	Sin hablantes de lengua indígena	Sin hablantes de lengua indígena	Sin hablantes de lengua indígena	Sin hablantes de lengua indígena	Sin hablantes de lengua indígena	Sin hablantes de lengua indígena	Sin hablantes de lengua indígena	Agricultura	NE	NE	NO	NO	NO	NO	NO	Pobreza o marginación	NO	Red de agua no disponible	NO	Red de drenaje no disponible	NO	NO	No hay recolección	SI	NO	NO	NO	SI	NO	NO	NO	SI	NO	NO	SI
12	Guerrero	001	Acapulco de Juárez	0167	Tuncingo	0994721	165103	0085	Pavimentada	Conexa a carretera	Micro, combi o camioneta	De 30 a 60 min	De 21 a 30 salidas al día	De 10 a 14 pesos	Sin hablantes de lengua indígena	Sin hablantes de lengua indígena	Sin hablantes de lengua indígena	Sin hablantes de lengua indígena	Sin hablantes de lengua indígena	Sin hablantes de lengua indígena	Sin hablantes de lengua indígena	Insuficientemente especificado del sector construcción	NE	NE	NO	NO	SI	SI	SI	Delincuencia o inseguridad	SI	Disponible con cobro	NO	Red de drenaje no disponible	NO	NO	No hay recolección	SI	NO	NO	NO	SI	NO	NO	NO	NO	NO	NO	SI
12	Guerrero	001	Acapulco de Juárez	0169	El Veladero (Veladero Morelos)	0995308	165552	0464	Terracería	Conexa a carretera	Camión de redilas o troca	De 30 a 60 min	De 21 a 30 salidas al día	De 10 a 14 pesos	Sin hablantes de lengua indígena	Sin hablantes de lengua indígena	Sin hablantes de lengua indígena	Sin hablantes de lengua indígena	Sin hablantes de lengua indígena	Sin hablantes de lengua indígena	Sin hablantes de lengua indígena	Agricultura	Cría y explotación de animales	NE	SI	NO	NO	NO	NO	Falta de infraestructura o servicio de agua	NO	Red de agua no disponible	NO	Red de drenaje no disponible	NO	NO	No hay recolección	SI	NO	SI	NO	SI	SI	NO	SI	SI	NO	NO	SI
12	Guerrero	001	Acapulco de Juárez	0171	Venta Vieja	0993345	170648	0100	Terracería	Conexa a carretera	No hay transporte	No hay transporte	No hay transporte	No hay transporte	Sin hablantes de lengua indígena	Sin hablantes de lengua indígena	Sin hablantes de lengua indígena	Sin hablantes de lengua indígena	Sin hablantes de lengua indígena	Sin hablantes de lengua indígena	Sin hablantes de lengua indígena	Agricultura	Pesca	NE	NO	NO	NO	NO	NO	Falta de infraestructura o servicio de agua	NO	Red de agua no disponible	NO	Red de drenaje no disponible	NO	NO	No hay recolección	SI	NO	NO	NO	NO	NO	NO	NO	SI	NO	NO	SI
12	Guerrero	001	Acapulco de Juárez	0174	Xolapa	0993651	170938	0230	Pavimentada	Conexa a carretera	No hay transporte	No hay transporte	No hay transporte	No hay transporte	Sin hablantes de lengua indígena	Sin hablantes de lengua indígena	Sin hablantes de lengua indígena	Sin hablantes de lengua indígena	Sin hablantes de lengua indígena	Sin hablantes de lengua indígena	Sin hablantes de lengua indígena	Agricultura	Pesca	NE	SI	NO	SI	NO	SI	Falta de infraestructura o servicio de agua	NO	Red de agua no disponible	NO	Red de drenaje no disponible	NO	NO	No hay recolección	SI	SI	SI	NO	SI	NO	NO	NO	SI	NO	NO	SI
12	Guerrero	001	Acapulco de Juárez	0177	El Zapote	0995056	165924	0199	Pavimentada	Conexa a carretera	No hay transporte	No hay transporte	No hay transporte	No hay transporte	Sin hablantes de lengua indígena	Sin hablantes de lengua indígena	Sin hablantes de lengua indígena	Sin hablantes de lengua indígena	Sin hablantes de lengua indígena	Sin hablantes de lengua indígena	Sin hablantes de lengua indígena	Agricultura	Insuficientemente especificado del sector transportes	Trabajos de albañilería de instalaciones hidrosanitarias y eléctricas y de trabajos en exteriores	NO	NO	NO	NO	NO	Falta de empleo o emigración	NO	Red de agua no disponible	NO	Red de drenaje no disponible	NO	NO	No hay recolección	SI	NO	SI	NO	SI	SI	NO	NO	NO	NO	NO	SI
12	Guerrero	001	Acapulco de Juárez	0193	El Embarcadero (Las Totolas)	0993857	165125	0018	Pavimentada	Conexa a carretera	No hay transporte	No hay transporte	No hay transporte	No hay transporte	Sin hablantes de lengua indígena	Sin hablantes de lengua indígena	Sin hablantes de lengua indígena	Sin hablantes de lengua indígena	Sin hablantes de lengua indígena	Sin hablantes de lengua indígena	Sin hablantes de lengua indígena	Agricultura	Insuficientemente especificado del sector construcción	NE	NO	SI	NO	NO	SI	Falta de otros servicios o equipamiento	NA	NA	NA	NA	NA	NA	NA	NA	NA	NA	NA	NA	NA	NA	NA	NA	NA	NA	NA
12	Guerrero	001	Acapulco de Juárez	0197	Kilómetro 22	0994830	165744	0100	Pavimentada	Conexa a carretera	No hay transporte	No hay transporte	No hay transporte	No hay transporte	Sin hablantes de lengua indígena	Sin hablantes de lengua indígena	Sin hablantes de lengua indígena	Sin hablantes de lengua indígena	Sin hablantes de lengua indígena	Sin hablantes de lengua indígena	Sin hablantes de lengua indígena	Agricultura	Trabajos de albañilería de instalaciones hidrosanitarias y eléctricas y de trabajos en exteriores	Trabajos de albañilería de instalaciones hidrosanitarias y eléctricas y de trabajos en exteriores	NO	NO	NO	NO	SI	Falta de drenaje y alcantarillado	SI	Disponible con cobro	NO	Red de drenaje no disponible	NO	SI	Entierran la basura	SI	NO	NO	NO	NO	SI	NO	NO	NO	NO	NO	SI
12	Guerrero	001	Acapulco de Juárez	0208	Paraje de la Zorra	0993904	170747	0340	Pavimentada	Conexa a carretera	No hay transporte	No hay transporte	No hay transporte	No hay transporte	Sin hablantes de lengua indígena	Sin hablantes de lengua indígena	Sin hablantes de lengua indígena	Sin hablantes de lengua indígena	Sin hablantes de lengua indígena	Sin hablantes de lengua indígena	Sin hablantes de lengua indígena	Agricultura	NE	NE	NO	NO	NO	NO	NO	Falta de infraestructura o servicio de agua	NA	NA	NA	NA	NA	NA	NA	NA	NA	NA	NA	NA	NA	NA	NA	NA	NA	NA	NA
12	Guerrero	001	Acapulco de Juárez	0214	Puente de Fierro	0994139	170715	0499	Pavimentada	Conexa a carretera	No hay transporte	No hay transporte	No hay transporte	No hay transporte	Sin hablantes de lengua indígena	Sin hablantes de lengua indígena	Sin hablantes de lengua indígena	Sin hablantes de lengua indígena	Sin hablantes de lengua indígena	Sin hablantes de lengua indígena	Sin hablantes de lengua indígena	Agricultura	NE	NE	NO	NO	NO	NO	NO	Falta de infraestructura o servicio de agua	NA	NA	NA	NA	NA	NA	NA	NA	NA	NA	NA	NA	NA	NA	NA	NA	NA	NA	NA
12	Guerrero	001	Acapulco de Juárez	0219	Paso Texca	0994842	165838	0158	Pavimentada	Conexa a carretera	No hay transporte	No hay transporte	No hay transporte	No hay transporte	Sin hablantes de lengua indígena	Sin hablantes de lengua indígena	Sin hablantes de lengua indígena	Sin hablantes de lengua indígena	Sin hablantes de lengua indígena	Sin hablantes de lengua indígena	Sin hablantes de lengua indígena	Insuficientemente especificado del sector construcción	Comercio al por menor de vehículos de motor, refacciones, combustibles y lubricantes	Insuficientemente especificado del sector transportes	NO	NO	NO	NO	NO	Falta de empleo o emigración	NO	Red de agua no disponible	NO	Red de drenaje no disponible	NO	NO	No hay recolección	SI	NO	NO	NO	NO	NO	NO	NO	NO	NO	NO	SI
12	Guerrero	001	Acapulco de Juárez	0242	Bella Vista Papagayo	0993602	164626	0030	Pavimentada	Conexa a carretera	Micro, combi o camioneta	Más de 1 y hasta 1.5 horas	De 21 a 30 salidas al día	De 10 a 14 pesos	Sin hablantes de lengua indígena	Sin hablantes de lengua indígena	Sin hablantes de lengua indígena	Sin hablantes de lengua indígena	Sin hablantes de lengua indígena	Sin hablantes de lengua indígena	Sin hablantes de lengua indígena	Agricultura	Pesca	Minería de minerales no metálicos	NO	NO	NO	NO	NO	Falta de infraestructura o servicio de agua	NO	Red de agua no disponible	NO	Red de drenaje no disponible	NO	SI	Queman la basura	SI	SI	SI	NO	SI	SI	NO	NO	NO	NO	NO	NO
12	Guerrero	001	Acapulco de Juárez	0293	Villa Guerrero	0994931	165543	0060	Terracería	Conexa a carretera	Micro, combi o camioneta	De 30 a 60 min	De 11 a 20 salidas al día	De 3 a 6 pesos	Con hablantes de lengua indígena	Mixteco	SI	NO	SI	NO	NO	Insuficientemente especificado del sector construcción	Agricultura	Otras industrias manufactureras	NO	NO	NO	NO	NO	Falta de drenaje y alcantarillado	NE	Disponibilidad de red de agua NE	NE	Disponibilidad NE	NE	NE	Recolección y limpieza NE	NE	NE	NE	NE	NE	NE	NE	NE	NE	NE	NE	NE
12	Guerrero	001	Acapulco de Juárez	0297	El Arenal	0994240	164753	0001	Terracería	Conexa a carretera	No hay transporte	No hay transporte	No hay transporte	No hay transporte	Sin hablantes de lengua indígena	Sin hablantes de lengua indígena	Sin hablantes de lengua indígena	Sin hablantes de lengua indígena	Sin hablantes de lengua indígena	Sin hablantes de lengua indígena	Sin hablantes de lengua indígena	Agricultura	Insuficientemente especificado del sector construcción	NE	NO	NO	SI	NO	NO	Falta de carretera o transporte	SI	Disponible con cobro	NO	Red de drenaje no disponible	NO	NO	No hay recolección	SI	NO	NO	NO	SI	NO	SI	NO	NO	NO	SI	NO
12	Guerrero	001	Acapulco de Juárez	0329	El Zoyamichal	0994112	171142	0657	Terracería	Conexa a carretera	No hay transporte	No hay transporte	No hay transporte	No hay transporte	Sin hablantes de lengua indígena	Sin hablantes de lengua indígena	Sin hablantes de lengua indígena	Sin hablantes de lengua indígena	Sin hablantes de lengua indígena	Sin hablantes de lengua indígena	Sin hablantes de lengua indígena	Agricultura	Cría y explotación de animales	NE	NO	NO	NO	SI	NO	Falta de carretera o transporte	NA	NA	NA	NA	NA	NA	NA	NA	NA	NA	NA	NA	NA	NA	NA	NA	NA	NA	NA
12	Guerrero	001	Acapulco de Juárez	0331	Campo Rojo	0994834	170619	0759	Terracería	Conexa a carretera	Taxi	De 30 a 60 min	Sin salidas diarias	De 30 a 34 pesos	Sin hablantes de lengua indígena	Sin hablantes de lengua indígena	Sin hablantes de lengua indígena	Sin hablantes de lengua indígena	Sin hablantes de lengua indígena	Sin hablantes de lengua indígena	Sin hablantes de lengua indígena	Agricultura	Cría y explotación de animales	NE	NO	NO	NO	NO	NO	Falta de infraestructura o servicio de agua	NA	NA	NA	NA	NA	NA	NA	NA	NA	NA	NA	NA	NA	NA	NA	NA	NA	NA	NA
12	Guerrero	001	Acapulco de Juárez	0338	Las Joyas	0994435	170059	0265	No conexa a carretera	Distancia NE	No hay transporte	No hay transporte	No hay transporte	No hay transporte	Sin hablantes de lengua indígena	Sin hablantes de lengua indígena	Sin hablantes de lengua indígena	Sin hablantes de lengua indígena	Sin hablantes de lengua indígena	Sin hablantes de lengua indígena	Sin hablantes de lengua indígena	Agricultura	NE	NE	NO	NO	NO	NO	NO	Falta de otros servicios o equipamiento	NO	Red de agua no disponible	NO	Red de drenaje no disponible	NO	NO	No hay recolección	SI	NO	NO	NO	NO	SI	NO	NO	SI	NO	NO	SI
12	Guerrero	001	Acapulco de Juárez	0343	Las Chanecas	0994108	164917	0039	Pavimentada	Conexa a carretera	Micro, combi o camioneta	Más de 1 y hasta 1.5 horas	Más de 60 salidas	De 50 a 59 pesos	Sin hablantes de lengua indígena	Sin hablantes de lengua indígena	Sin hablantes de lengua indígena	Sin hablantes de lengua indígena	Sin hablantes de lengua indígena	Sin hablantes de lengua indígena	Sin hablantes de lengua indígena	Insuficientemente especificado del sector construcción	Insuficientemente especificado del sector comercio al por menor	Agricultura	NO	NO	NO	NO	NO	Falta de drenaje y alcantarillado	SI	Disponible sin cobro	NO	Red de drenaje no disponible	NO	NO	No hay recolección	SI	NO	NO	NO	NO	SI	NO	NO	NO	NO	NO	SI
12	Guerrero	001	Acapulco de Juárez	0349	San Andrés Playa Encantada (El Podrido)	0993802	164132	0005	Pavimentada	Conexa a carretera	Micro, combi o camioneta	De 30 a 60 min	Más de 60 salidas	De 10 a 14 pesos	Sin hablantes de lengua indígena	Sin hablantes de lengua indígena	Sin hablantes de lengua indígena	Sin hablantes de lengua indígena	Sin hablantes de lengua indígena	Sin hablantes de lengua indígena	Sin hablantes de lengua indígena	Pesca	Trabajan en otra localidad	NE	NO	NO	NO	SI	SI	Falta de empleo o emigración	NO	Red de agua no disponible	NO	Red de drenaje no disponible	NO	SI	Desalojan la basura a otro lugar	SI	SI	NO	NO	SI	NO	NO	SI	NO	SI	NO	SI
12	Guerrero	001	Acapulco de Juárez	0351	Candelilla (Las Palmitas)	0994221	164700	0005	No conexa a carretera	De 4 a 10 km	No hay transporte	No hay transporte	No hay transporte	No hay transporte	Sin hablantes de lengua indígena	Sin hablantes de lengua indígena	Sin hablantes de lengua indígena	Sin hablantes de lengua indígena	Sin hablantes de lengua indígena	Sin hablantes de lengua indígena	Sin hablantes de lengua indígena	Pesca	Agricultura	NE	NO	NO	NO	NO	NO	Contaminación ambiental	NE	Disponibilidad de red de agua NE	NE	Disponibilidad NE	NE	NE	Recolección y limpieza NE	NE	NE	NE	NE	NE	NE	NE	NE	NE	NE	NE	NE
12	Guerrero	001	Acapulco de Juárez	0353	Cabeza de Tigre	0993505	165119	0160	Terracería	Conexa a carretera	No hay transporte	No hay transporte	No hay transporte	No hay transporte	Sin hablantes de lengua indígena	Sin hablantes de lengua indígena	Sin hablantes de lengua indígena	Sin hablantes de lengua indígena	Sin hablantes de lengua indígena	Sin hablantes de lengua indígena	Sin hablantes de lengua indígena	Agricultura	Comercio al por menor de vehículos de motor, refacciones, combustibles y lubricantes	NE	NO	NO	NO	NO	NE	Falta de energía eléctrica	NA	NA	NA	NA	NA	NA	NA	NA	NA	NA	NA	NA	NA	NA	NA	NA	NA	NA	NA
12	Guerrero	001	Acapulco de Juárez	0354	Cacahuate	0994216	164326	0005	Pavimentada	Conexa a carretera	Micro, combi o camioneta	De 30 a 60 min	Más de 60 salidas	De 10 a 14 pesos	Sin hablantes de lengua indígena	Sin hablantes de lengua indígena	Sin hablantes de lengua indígena	Sin hablantes de lengua indígena	Sin hablantes de lengua indígena	Sin hablantes de lengua indígena	Sin hablantes de lengua indígena	Agricultura	Agricultura	Agricultura	NO	NO	NO	NO	NO	Pobreza o marginación	NA	NA	NA	NA	NA	NA	NA	NA	NA	NA	NA	NA	NA	NA	NA	NA	NA	NA	NA
12	Guerrero	001	Acapulco de Juárez	0355	Tasajeras	0993702	164840	0041	Terracería	Conexa a carretera	No hay transporte	No hay transporte	No hay transporte	No hay transporte	Sin hablantes de lengua indígena	Sin hablantes de lengua indígena	Sin hablantes de lengua indígena	Sin hablantes de lengua indígena	Sin hablantes de lengua indígena	Sin hablantes de lengua indígena	Sin hablantes de lengua indígena	Agricultura	Insuficientemente especificado del sector construcción	NE	NO	NO	NO	NO	NO	No especificado	SI	Disponible con cobro	NO	Red de drenaje no disponible	SI	NO	Destino NE	SI	NO	SI	NO	SI	NO	SI	SI	NO	NO	NO	SI
12	Guerrero	001	Acapulco de Juárez	0356	Zoyamiche	0993523	164803	0075	No conexa a carretera	De 1 a 3 km	No hay transporte	No hay transporte	No hay transporte	No hay transporte	Sin hablantes de lengua indígena	Sin hablantes de lengua indígena	Sin hablantes de lengua indígena	Sin hablantes de lengua indígena	Sin hablantes de lengua indígena	Sin hablantes de lengua indígena	Sin hablantes de lengua indígena	NE	NE	NE	NE	NE	NE	NE	NE	No especificado	NA	NA	NA	NA	NA	NA	NA	NA	NA	NA	NA	NA	NA	NA	NA	NA	NA	NA	NA
12	Guerrero	001	Acapulco de Juárez	0360	Banco de Oro	0994747	165317	0032	Terracería	Conexa a carretera	No hay transporte	No hay transporte	No hay transporte	No hay transporte	Sin hablantes de lengua indígena	Sin hablantes de lengua indígena	Sin hablantes de lengua indígena	Sin hablantes de lengua indígena	Sin hablantes de lengua indígena	Sin hablantes de lengua indígena	Sin hablantes de lengua indígena	Agricultura	NE	NE	NO	NO	NO	NO	NO	Falta de energía eléctrica	NA	NA	NA	NA	NA	NA	NA	NA	NA	NA	NA	NA	NA	NA	NA	NA	NA	NA	NA
12	Guerrero	001	Acapulco de Juárez	0366	La Calera Dos	0994606	165947	0299	Pavimentada	Conexa a carretera	No hay transporte	No hay transporte	No hay transporte	No hay transporte	Sin hablantes de lengua indígena	Sin hablantes de lengua indígena	Sin hablantes de lengua indígena	Sin hablantes de lengua indígena	Sin hablantes de lengua indígena	Sin hablantes de lengua indígena	Sin hablantes de lengua indígena	Agricultura	NE	NE	NO	NO	NO	NO	NO	Falta de infraestructura o servicio de agua	NA	NA	NA	NA	NA	NA	NA	NA	NA	NA	NA	NA	NA	NA	NA	NA	NA	NA	NA
12	Guerrero	001	Acapulco de Juárez	0371	Los Coyotes	0994629	165409	0057	Terracería	Conexa a carretera	No hay transporte	No hay transporte	No hay transporte	No hay transporte	Sin hablantes de lengua indígena	Sin hablantes de lengua indígena	Sin hablantes de lengua indígena	Sin hablantes de lengua indígena	Sin hablantes de lengua indígena	Sin hablantes de lengua indígena	Sin hablantes de lengua indígena	Agricultura	NE	NE	NO	NO	NO	NO	NO	Falta de carretera o transporte	NA	NA	NA	NA	NA	NA	NA	NA	NA	NA	NA	NA	NA	NA	NA	NA	NA	NA	NA
12	Guerrero	001	Acapulco de Juárez	0377	10 de Abril	0994427	164945	0017	Pavimentada	Conexa a carretera	No hay transporte	No hay transporte	No hay transporte	No hay transporte	Sin hablantes de lengua indígena	Sin hablantes de lengua indígena	Sin hablantes de lengua indígena	Sin hablantes de lengua indígena	Sin hablantes de lengua indígena	Sin hablantes de lengua indígena	Sin hablantes de lengua indígena	Insuficientemente especificado del sector construcción	NE	NE	NO	NO	NO	NO	NO	Falta de empleo o emigración	SI	Disponible con cobro	NO	Red de drenaje no disponible	NO	SI	Desalojan la basura a otro lugar	SI	NO	NO	SI	SI	NO	NO	NO	NO	NO	NO	SI
12	Guerrero	001	Acapulco de Juárez	0387	La Hacienda (La Hacienda de Papagayo)	0993734	164439	0022	No conexa a carretera	Distancia NE	No hay transporte	No hay transporte	No hay transporte	No hay transporte	Sin hablantes de lengua indígena	Sin hablantes de lengua indígena	Sin hablantes de lengua indígena	Sin hablantes de lengua indígena	Sin hablantes de lengua indígena	Sin hablantes de lengua indígena	Sin hablantes de lengua indígena	Agricultura	NE	NE	NO	NO	NO	NO	NO	Otra clase de problema	NA	NA	NA	NA	NA	NA	NA	NA	NA	NA	NA	NA	NA	NA	NA	NA	NA	NA	NA
12	Guerrero	001	Acapulco de Juárez	0388	La Herradura	0994748	165306	0023	Terracería	Conexa a carretera	No hay transporte	No hay transporte	No hay transporte	No hay transporte	Sin hablantes de lengua indígena	Sin hablantes de lengua indígena	Sin hablantes de lengua indígena	Sin hablantes de lengua indígena	Sin hablantes de lengua indígena	Sin hablantes de lengua indígena	Sin hablantes de lengua indígena	Agricultura	NE	NE	NO	NO	NO	SI	SI	Falta de carretera o transporte	NA	NA	NA	NA	NA	NA	NA	NA	NA	NA	NA	NA	NA	NA	NA	NA	NA	NA	NA
12	Guerrero	001	Acapulco de Juárez	0390	Huerta Paraíso (Paraíso de la Laguna)	0994256	164820	0006	Pavimentada	Conexa a carretera	No hay transporte	No hay transporte	No hay transporte	No hay transporte	Sin hablantes de lengua indígena	Sin hablantes de lengua indígena	Sin hablantes de lengua indígena	Sin hablantes de lengua indígena	Sin hablantes de lengua indígena	Sin hablantes de lengua indígena	Sin hablantes de lengua indígena	Agricultura	Pesca	NE	NO	NO	NO	NO	NO	Sequía, inundaciones o clima adverso	NA	NA	NA	NA	NA	NA	NA	NA	NA	NA	NA	NA	NA	NA	NA	NA	NA	NA	NA
12	Guerrero	001	Acapulco de Juárez	0393	Kilómetro Treinta y Dos (Colonia la Unión)	0994716	170101	0325	Pavimentada	Conexa a carretera	No hay transporte	No hay transporte	No hay transporte	No hay transporte	Sin hablantes de lengua indígena	Sin hablantes de lengua indígena	Sin hablantes de lengua indígena	Sin hablantes de lengua indígena	Sin hablantes de lengua indígena	Sin hablantes de lengua indígena	Sin hablantes de lengua indígena	Agricultura	NE	NE	NO	NO	NO	NO	NO	Falta de otros servicios o equipamiento	NE	Disponibilidad de red de agua NE	NE	Disponibilidad NE	NE	NE	Recolección y limpieza NE	NE	NE	NE	NE	NE	NE	NE	NE	NE	NE	NE	NE
12	Guerrero	001	Acapulco de Juárez	0394	Kilómetro Treinta y Tres	0994723	170111	0329	Pavimentada	Conexa a carretera	Taxi	Tiempo de traslado NE	Frecuencia NE	De 60 a 74 pesos	Sin hablantes de lengua indígena	Sin hablantes de lengua indígena	Sin hablantes de lengua indígena	Sin hablantes de lengua indígena	Sin hablantes de lengua indígena	Sin hablantes de lengua indígena	Sin hablantes de lengua indígena	Agricultura	Insuficientemente especificado del sector construcción	NE	NO	NO	NO	NO	NO	Falta de empleo o emigración	NO	Red de agua no disponible	NO	Red de drenaje no disponible	NO	NO	No hay recolección	SI	NO	NO	NO	NO	NO	NO	SI	NO	NO	NO	NO
12	Guerrero	001	Acapulco de Juárez	0395	Kilómetro Treinta y Cinco	0994751	170149	0317	Terracería	Conexa a carretera	No hay transporte	No hay transporte	No hay transporte	No hay transporte	Sin hablantes de lengua indígena	Sin hablantes de lengua indígena	Sin hablantes de lengua indígena	Sin hablantes de lengua indígena	Sin hablantes de lengua indígena	Sin hablantes de lengua indígena	Sin hablantes de lengua indígena	Agricultura	NE	NE	NO	NO	NO	NO	NO	Falta de infraestructura o servicio de agua	NA	NA	NA	NA	NA	NA	NA	NA	NA	NA	NA	NA	NA	NA	NA	NA	NA	NA	NA
12	Guerrero	001	Acapulco de Juárez	0398	Los Limones	0994515	165249	0037	Pavimentada	Conexa a carretera	No hay transporte	No hay transporte	No hay transporte	No hay transporte	Sin hablantes de lengua indígena	Sin hablantes de lengua indígena	Sin hablantes de lengua indígena	Sin hablantes de lengua indígena	Sin hablantes de lengua indígena	Sin hablantes de lengua indígena	Sin hablantes de lengua indígena	Agricultura	Cría y explotación de animales	Aprovechamiento forestal	NO	NO	NO	NO	NO	Falta de equipamiento o servicios para la educación	NA	NA	NA	NA	NA	NA	NA	NA	NA	NA	NA	NA	NA	NA	NA	NA	NA	NA	NA
12	Guerrero	001	Acapulco de Juárez	0400	El Limón	0993855	170819	0304	Pavimentada	Conexa a carretera	No hay transporte	No hay transporte	No hay transporte	No hay transporte	Sin hablantes de lengua indígena	Sin hablantes de lengua indígena	Sin hablantes de lengua indígena	Sin hablantes de lengua indígena	Sin hablantes de lengua indígena	Sin hablantes de lengua indígena	Sin hablantes de lengua indígena	Agricultura	Cría y explotación de animales	NE	NO	NO	NO	NO	NO	Otra clase de problema	NA	NA	NA	NA	NA	NA	NA	NA	NA	NA	NA	NA	NA	NA	NA	NA	NA	NA	NA
12	Guerrero	001	Acapulco de Juárez	0404	Loma Larga Tres	0993337	165252	0210	Terracería	Conexa a carretera	No hay transporte	No hay transporte	No hay transporte	No hay transporte	Sin hablantes de lengua indígena	Sin hablantes de lengua indígena	Sin hablantes de lengua indígena	Sin hablantes de lengua indígena	Sin hablantes de lengua indígena	Sin hablantes de lengua indígena	Sin hablantes de lengua indígena	Agricultura	Cría y explotación de animales	NE	NO	NO	NO	NO	NO	Falta de infraestructura o servicio de agua	NA	NA	NA	NA	NA	NA	NA	NA	NA	NA	NA	NA	NA	NA	NA	NA	NA	NA	NA
12	Guerrero	001	Acapulco de Juárez	0408	El Manglito	0994107	164249	0001	No conexa a carretera	De 1 a 3 km	No hay transporte	No hay transporte	No hay transporte	No hay transporte	Sin hablantes de lengua indígena	Sin hablantes de lengua indígena	Sin hablantes de lengua indígena	Sin hablantes de lengua indígena	Sin hablantes de lengua indígena	Sin hablantes de lengua indígena	Sin hablantes de lengua indígena	Comercio al por menor de abarrotes, alimentos, bebidas, hielo y tabaco	Trabajan en otra localidad	NE	NO	NO	NO	NO	NO	Falta de infraestructura o servicio de agua	NA	NA	NA	NA	NA	NA	NA	NA	NA	NA	NA	NA	NA	NA	NA	NA	NA	NA	NA
12	Guerrero	001	Acapulco de Juárez	0409	Los Mayos	0993654	165711	0420	Terracería	Conexa a carretera	No hay transporte	No hay transporte	No hay transporte	No hay transporte	Sin hablantes de lengua indígena	Sin hablantes de lengua indígena	Sin hablantes de lengua indígena	Sin hablantes de lengua indígena	Sin hablantes de lengua indígena	Sin hablantes de lengua indígena	Sin hablantes de lengua indígena	Agricultura	Cría y explotación de animales	NE	NO	NO	NO	NO	NO	Falta de empleo o emigración	NA	NA	NA	NA	NA	NA	NA	NA	NA	NA	NA	NA	NA	NA	NA	NA	NA	NA	NA
12	Guerrero	001	Acapulco de Juárez	0411	Nicolás Bravo (Zanja del Teniente)	0994451	164957	0001	Pavimentada	Conexa a carretera	No hay transporte	No hay transporte	No hay transporte	No hay transporte	Sin hablantes de lengua indígena	Sin hablantes de lengua indígena	Sin hablantes de lengua indígena	Sin hablantes de lengua indígena	Sin hablantes de lengua indígena	Sin hablantes de lengua indígena	Sin hablantes de lengua indígena	Agricultura	Insuficientemente especificado del sector construcción	Industria de la madera	NO	NO	NO	NO	NO	Falta de empleo o emigración	SI	Disponible con cobro	NO	Red de drenaje no disponible	SI	SI	Desalojan la basura a otro lugar	NO	NO	NO	NO	NO	NO	NO	NO	NO	NO	NO	SI
12	Guerrero	001	Acapulco de Juárez	0413	Rancho Olea	0994226	164728	0005	No conexa a carretera	Distancia NE	No hay transporte	No hay transporte	No hay transporte	No hay transporte	Sin hablantes de lengua indígena	Sin hablantes de lengua indígena	Sin hablantes de lengua indígena	Sin hablantes de lengua indígena	Sin hablantes de lengua indígena	Sin hablantes de lengua indígena	Sin hablantes de lengua indígena	Cría y explotación de animales	Pesca	Agricultura	SI	NO	NO	NO	NO	No especificado	NA	NA	NA	NA	NA	NA	NA	NA	NA	NA	NA	NA	NA	NA	NA	NA	NA	NA	NA
12	Guerrero	001	Acapulco de Juárez	0416	El Ranchito (Las Palmitas)	0993903	164943	0038	Pavimentada	Conexa a carretera	Micro, combi o camioneta	De 30 a 60 min	Más de 60 salidas	De 10 a 14 pesos	Sin hablantes de lengua indígena	Sin hablantes de lengua indígena	Sin hablantes de lengua indígena	Sin hablantes de lengua indígena	Sin hablantes de lengua indígena	Sin hablantes de lengua indígena	Sin hablantes de lengua indígena	Agricultura	NE	NE	NO	NO	NO	NO	SI	Falta de empleo o emigración	NE	Disponibilidad de red de agua NE	NE	Disponibilidad NE	NE	NE	Recolección y limpieza NE	NE	NE	NE	NE	NE	NE	NE	NE	NE	NE	NE	NE
12	Guerrero	001	Acapulco de Juárez	0426	Piedra Rajada	0994359	170622	0580	Terracería	Conexa a carretera	No hay transporte	No hay transporte	No hay transporte	No hay transporte	Sin hablantes de lengua indígena	Sin hablantes de lengua indígena	Sin hablantes de lengua indígena	Sin hablantes de lengua indígena	Sin hablantes de lengua indígena	Sin hablantes de lengua indígena	Sin hablantes de lengua indígena	Agricultura	Cría y explotación de animales	NE	NO	NO	NO	NO	NO	Falta de otros servicios o equipamiento	NA	NA	NA	NA	NA	NA	NA	NA	NA	NA	NA	NA	NA	NA	NA	NA	NA	NA	NA
12	Guerrero	001	Acapulco de Juárez	0431	El Podrido	0994021	164223	0003	Pavimentada	Conexa a carretera	Micro, combi o camioneta	De 30 a 60 min	Más de 60 salidas	De 10 a 14 pesos	Con hablantes de lengua indígena	Mixteco	SI	NO	NO	NO	NO	Agricultura	Agricultura	Agricultura	SI	NO	NO	NO	SI	Pobreza o marginación	NE	Disponibilidad de red de agua NE	NE	Disponibilidad NE	NE	NE	Recolección y limpieza NE	NE	NE	NE	NE	NE	NE	NE	NE	NE	NE	NE	NE
12	Guerrero	001	Acapulco de Juárez	0432	Poza Verde (Pozo Verde)	0994839	165302	0019	Pavimentada	Conexa a carretera	No hay transporte	No hay transporte	No hay transporte	No hay transporte	Sin hablantes de lengua indígena	Sin hablantes de lengua indígena	Sin hablantes de lengua indígena	Sin hablantes de lengua indígena	Sin hablantes de lengua indígena	Sin hablantes de lengua indígena	Sin hablantes de lengua indígena	Servicios de alojamiento temporal	NE	NE	NO	NO	NO	NO	NO	Falta de energía eléctrica	NA	NA	NA	NA	NA	NA	NA	NA	NA	NA	NA	NA	NA	NA	NA	NA	NA	NA	NA
12	Guerrero	001	Acapulco de Juárez	0433	Punta de Casa	0993924	164439	0009	No conexa a carretera	Distancia NE	No hay transporte	No hay transporte	No hay transporte	No hay transporte	Sin hablantes de lengua indígena	Sin hablantes de lengua indígena	Sin hablantes de lengua indígena	Sin hablantes de lengua indígena	Sin hablantes de lengua indígena	Sin hablantes de lengua indígena	Sin hablantes de lengua indígena	Agricultura	Pesca	NE	NO	NO	NO	NO	NO	Falta de empleo o emigración	NA	NA	NA	NA	NA	NA	NA	NA	NA	NA	NA	NA	NA	NA	NA	NA	NA	NA	NA
12	Guerrero	001	Acapulco de Juárez	0436	El Salitre	0993829	170816	0307	Pavimentada	Conexa a carretera	No hay transporte	No hay transporte	No hay transporte	No hay transporte	Sin hablantes de lengua indígena	Sin hablantes de lengua indígena	Sin hablantes de lengua indígena	Sin hablantes de lengua indígena	Sin hablantes de lengua indígena	Sin hablantes de lengua indígena	Sin hablantes de lengua indígena	Servicios de preparación de alimentos y bebidas	NE	NE	NO	NO	NO	NO	NO	Falta de infraestructura o servicio de agua	NA	NA	NA	NA	NA	NA	NA	NA	NA	NA	NA	NA	NA	NA	NA	NA	NA	NA	NA
12	Guerrero	001	Acapulco de Juárez	0446	Varadero de Tres Palos	0994534	164835	0001	Terracería	Conexa a carretera	No hay transporte	No hay transporte	No hay transporte	No hay transporte	Sin hablantes de lengua indígena	Sin hablantes de lengua indígena	Sin hablantes de lengua indígena	Sin hablantes de lengua indígena	Sin hablantes de lengua indígena	Sin hablantes de lengua indígena	Sin hablantes de lengua indígena	Pesca	Insuficientemente especificado del sector comercio al por menor	NE	NO	NO	NE	NO	NO	No especificado	NA	NA	NA	NA	NA	NA	NA	NA	NA	NA	NA	NA	NA	NA	NA	NA	NA	NA	NA
12	Guerrero	001	Acapulco de Juárez	0448	La Vista Alegre	0993725	164856	0039	Terracería	Conexa a carretera	No hay transporte	No hay transporte	No hay transporte	No hay transporte	Sin hablantes de lengua indígena	Sin hablantes de lengua indígena	Sin hablantes de lengua indígena	Sin hablantes de lengua indígena	Sin hablantes de lengua indígena	Sin hablantes de lengua indígena	Sin hablantes de lengua indígena	Agricultura	Insuficientemente especificado del sector construcción	NE	NO	NO	NO	NO	NO	No especificado	NA	NA	NA	NA	NA	NA	NA	NA	NA	NA	NA	NA	NA	NA	NA	NA	NA	NA	NA
12	Guerrero	001	Acapulco de Juárez	0454	Colonia Mangos (El Quemado)	0994915	165542	0043	Pavimentada	Conexa a carretera	Autobús	De 30 a 60 min	De 21 a 30 salidas al día	De 7 a 9 pesos	Con hablantes de lengua indígena	Náhuatl	SI	NO	SI	NO	NO	Edificación residencial	Agricultura	NE	NO	NO	NO	NO	NO	Falta de energía eléctrica	SI	Disponible con cobro	NO	Red de drenaje no disponible	NO	SI	Entierran la basura	SI	NO	SI	NO	NO	NO	NO	SI	NO	NO	NO	SI
12	Guerrero	001	Acapulco de Juárez	0456	El Potrero	0994016	170510	0760	Terracería	Conexa a carretera	No hay transporte	No hay transporte	No hay transporte	No hay transporte	Sin hablantes de lengua indígena	Sin hablantes de lengua indígena	Sin hablantes de lengua indígena	Sin hablantes de lengua indígena	Sin hablantes de lengua indígena	Sin hablantes de lengua indígena	Sin hablantes de lengua indígena	Agricultura	NE	NE	NO	NO	NO	NO	NO	Falta de infraestructura o servicio de agua	NA	NA	NA	NA	NA	NA	NA	NA	NA	NA	NA	NA	NA	NA	NA	NA	NA	NA	NA
12	Guerrero	001	Acapulco de Juárez	0457	Rascasola	0994622	165950	0310	Pavimentada	Conexa a carretera	No hay transporte	No hay transporte	No hay transporte	No hay transporte	Sin hablantes de lengua indígena	Sin hablantes de lengua indígena	Sin hablantes de lengua indígena	Sin hablantes de lengua indígena	Sin hablantes de lengua indígena	Sin hablantes de lengua indígena	Sin hablantes de lengua indígena	Agricultura	NE	NE	NO	NO	NO	NO	NO	Falta de otros servicios o equipamiento	NA	NA	NA	NA	NA	NA	NA	NA	NA	NA	NA	NA	NA	NA	NA	NA	NA	NA	NA
12	Guerrero	001	Acapulco de Juárez	0458	El Mango Solo (Las Tranquillas)	0994202	170510	0581	Terracería	Conexa a carretera	No hay transporte	No hay transporte	No hay transporte	No hay transporte	Sin hablantes de lengua indígena	Sin hablantes de lengua indígena	Sin hablantes de lengua indígena	Sin hablantes de lengua indígena	Sin hablantes de lengua indígena	Sin hablantes de lengua indígena	Sin hablantes de lengua indígena	Agricultura	NE	NE	NO	NO	NO	NO	NO	Falta de energía eléctrica	NA	NA	NA	NA	NA	NA	NA	NA	NA	NA	NA	NA	NA	NA	NA	NA	NA	NA	NA
12	Guerrero	001	Acapulco de Juárez	0459	Vista Hermosa	0995002	165135	0302	Terracería	Conexa a carretera	Micro, combi o camioneta	De 30 a 60 min	De 6 a 10 salidas al día	De 10 a 14 pesos	Sin hablantes de lengua indígena	Sin hablantes de lengua indígena	Sin hablantes de lengua indígena	Sin hablantes de lengua indígena	Sin hablantes de lengua indígena	Sin hablantes de lengua indígena	Sin hablantes de lengua indígena	Insuficientemente especificado del sector construcción	Servicios de reparación y mantenimiento de automóviles y camiones	Trabajos de albañilería de instalaciones hidrosanitarias y eléctricas y de trabajos en exteriores	NO	NO	NO	SI	NO	Falta de empleo o emigración	NO	Red de agua no disponible	NO	Red de drenaje no disponible	NO	NO	No hay recolección	SI	NO	SI	NO	SI	NO	NO	NO	NO	NO	NO	SI
12	Guerrero	001	Acapulco de Juárez	0460	Arroyo el Ejido	0994141	165915	0167	No conexa a carretera	Distancia NE	No hay transporte	No hay transporte	No hay transporte	No hay transporte	Sin hablantes de lengua indígena	Sin hablantes de lengua indígena	Sin hablantes de lengua indígena	Sin hablantes de lengua indígena	Sin hablantes de lengua indígena	Sin hablantes de lengua indígena	Sin hablantes de lengua indígena	Agricultura	Cría y explotación de animales	NE	NO	NO	NO	NO	NO	Falta de carretera o transporte	NA	NA	NA	NA	NA	NA	NA	NA	NA	NA	NA	NA	NA	NA	NA	NA	NA	NA	NA
12	Guerrero	001	Acapulco de Juárez	0461	El Libramiento (La Gasera)	0994952	165855	0180	Pavimentada	Conexa a carretera	No hay transporte	No hay transporte	No hay transporte	No hay transporte	Sin hablantes de lengua indígena	Sin hablantes de lengua indígena	Sin hablantes de lengua indígena	Sin hablantes de lengua indígena	Sin hablantes de lengua indígena	Sin hablantes de lengua indígena	Sin hablantes de lengua indígena	Agricultura	NE	NE	NO	NO	NO	NO	NO	Falta de energía eléctrica	NA	NA	NA	NA	NA	NA	NA	NA	NA	NA	NA	NA	NA	NA	NA	NA	NA	NA	NA
12	Guerrero	001	Acapulco de Juárez	0462	Agropecuaria	0994720	165318	0028	Terracería	Conexa a carretera	No hay transporte	No hay transporte	No hay transporte	No hay transporte	Sin hablantes de lengua indígena	Sin hablantes de lengua indígena	Sin hablantes de lengua indígena	Sin hablantes de lengua indígena	Sin hablantes de lengua indígena	Sin hablantes de lengua indígena	Sin hablantes de lengua indígena	Agricultura	NE	NE	NO	NO	NO	NO	NO	Pobreza o marginación	NA	NA	NA	NA	NA	NA	NA	NA	NA	NA	NA	NA	NA	NA	NA	NA	NA	NA	NA
12	Guerrero	001	Acapulco de Juárez	0464	Arroyo Verde	0994020	165548	0099	Terracería	Conexa a carretera	No hay transporte	No hay transporte	No hay transporte	No hay transporte	Sin hablantes de lengua indígena	Sin hablantes de lengua indígena	Sin hablantes de lengua indígena	Sin hablantes de lengua indígena	Sin hablantes de lengua indígena	Sin hablantes de lengua indígena	Sin hablantes de lengua indígena	Agricultura	Cría y explotación de animales	Aprovechamiento forestal	SI	SI	SI	NO	NO	Falta de apoyo o deficiencia gubernamental	NA	NA	NA	NA	NA	NA	NA	NA	NA	NA	NA	NA	NA	NA	NA	NA	NA	NA	NA
12	Guerrero	001	Acapulco de Juárez	0467	Josefina de la O	0994732	165309	0024	NDAI	NDAI	NDAI	NDAI	NDAI	NDAI	NDAI	NDAI	NDAI	NDAI	NDAI	NDAI	NDAI	NDAI	NDAI	NDAI	NDAI	NDAI	NDAI	NDAI	NDAI	No especificado	NA	NA	NA	NA	NA	NA	NA	NA	NA	NA	NA	NA	NA	NA	NA	NA	NA	NA	NA
12	Guerrero	001	Acapulco de Juárez	0470	El Paraíso	0994831	165302	0017	No conexa a carretera	Distancia NE	No hay transporte	No hay transporte	No hay transporte	No hay transporte	Sin hablantes de lengua indígena	Sin hablantes de lengua indígena	Sin hablantes de lengua indígena	Sin hablantes de lengua indígena	Sin hablantes de lengua indígena	Sin hablantes de lengua indígena	Sin hablantes de lengua indígena	Insuficientemente especificado del sector construcción	Agricultura	NE	NO	NO	NO	SI	SI	Delincuencia o inseguridad	NA	NA	NA	NA	NA	NA	NA	NA	NA	NA	NA	NA	NA	NA	NA	NA	NA	NA	NA
12	Guerrero	001	Acapulco de Juárez	0473	La Cámara	0994805	165324	0033	Terracería	Conexa a carretera	No hay transporte	No hay transporte	No hay transporte	No hay transporte	Sin hablantes de lengua indígena	Sin hablantes de lengua indígena	Sin hablantes de lengua indígena	Sin hablantes de lengua indígena	Sin hablantes de lengua indígena	Sin hablantes de lengua indígena	Sin hablantes de lengua indígena	Agricultura	Insuficientemente especificado del sector construcción	NE	NO	NO	NO	NO	NO	Sin problema	NA	NA	NA	NA	NA	NA	NA	NA	NA	NA	NA	NA	NA	NA	NA	NA	NA	NA	NA
12	Guerrero	001	Acapulco de Juárez	0474	El Chorro (La Cascada)	0993729	170907	0200	Pavimentada	Conexa a carretera	No hay transporte	No hay transporte	No hay transporte	No hay transporte	Sin hablantes de lengua indígena	Sin hablantes de lengua indígena	Sin hablantes de lengua indígena	Sin hablantes de lengua indígena	Sin hablantes de lengua indígena	Sin hablantes de lengua indígena	Sin hablantes de lengua indígena	Agricultura	NE	NE	NO	NO	NO	NO	NO	Falta de empleo o emigración	NA	NA	NA	NA	NA	NA	NA	NA	NA	NA	NA	NA	NA	NA	NA	NA	NA	NA	NA
12	Guerrero	001	Acapulco de Juárez	0476	Jesús Hernández	0994724	165303	0022	Terracería	Conexa a carretera	Micro, combi o camioneta	De 20 a 24 min	De 31 a 60 salidas al día	De 10 a 14 pesos	Sin hablantes de lengua indígena	Sin hablantes de lengua indígena	Sin hablantes de lengua indígena	Sin hablantes de lengua indígena	Sin hablantes de lengua indígena	Sin hablantes de lengua indígena	Sin hablantes de lengua indígena	Agricultura	Agricultura	NE	NO	NO	NO	NO	NO	Falta de otros servicios o equipamiento	NA	NA	NA	NA	NA	NA	NA	NA	NA	NA	NA	NA	NA	NA	NA	NA	NA	NA	NA
12	Guerrero	001	Acapulco de Juárez	0477	Laguna la Testaruda	0994742	165329	0040	No conexa a carretera	De 1 a 3 km	No hay transporte	No hay transporte	No hay transporte	No hay transporte	Sin hablantes de lengua indígena	Sin hablantes de lengua indígena	Sin hablantes de lengua indígena	Sin hablantes de lengua indígena	Sin hablantes de lengua indígena	Sin hablantes de lengua indígena	Sin hablantes de lengua indígena	Pesca	NE	NE	NO	NO	NO	NO	NO	Falta de energía eléctrica	NA	NA	NA	NA	NA	NA	NA	NA	NA	NA	NA	NA	NA	NA	NA	NA	NA	NA	NA
12	Guerrero	001	Acapulco de Juárez	0478	Nueva Frontera	0994857	165317	0018	Terracería	Conexa a carretera	Micro, combi o camioneta	De 20 a 24 min	De 31 a 60 salidas al día	De 3 a 6 pesos	Sin hablantes de lengua indígena	Sin hablantes de lengua indígena	Sin hablantes de lengua indígena	Sin hablantes de lengua indígena	Sin hablantes de lengua indígena	Sin hablantes de lengua indígena	Sin hablantes de lengua indígena	Fabricación de muebles, colchones y persianas	Insuficientemente especificado del sector construcción	Fabricación de productos metálicos	NO	NO	NO	SI	SI	Contaminación ambiental	NO	Red de agua no disponible	NO	Red de drenaje no disponible	SI	SI	Queman la basura	SI	NO	NO	NO	NO	NO	NO	NO	NO	NO	NO	SI
12	Guerrero	001	Acapulco de Juárez	0479	Las Marcelas	0994605	165235	0040	NE	Conexión a carretera NE	Disponibilidad de transporte NE	Disponibilidad de transporte NE	Disponibilidad de transporte NE	Disponibilidad de transporte NE	NE	Hablantes de lengua indígena NE	Hablantes de lengua indígena NE	Hablantes de lengua indígena NE	Hablantes de lengua indígena NE	Hablantes de lengua indígena NE	Hablantes de lengua indígena NE	NE	NE	NE	NE	NE	NE	NE	NE	No especificado	NA	NA	NA	NA	NA	NA	NA	NA	NA	NA	NA	NA	NA	NA	NA	NA	NA	NA	NA
12	Guerrero	001	Acapulco de Juárez	0483	La Granja [Chivería]	0995150	165457	0253	NE	Conexión a carretera NE	Disponibilidad de transporte NE	Disponibilidad de transporte NE	Disponibilidad de transporte NE	Disponibilidad de transporte NE	NE	Hablantes de lengua indígena NE	Hablantes de lengua indígena NE	Hablantes de lengua indígena NE	Hablantes de lengua indígena NE	Hablantes de lengua indígena NE	Hablantes de lengua indígena NE	NE	NE	NE	NE	NE	NE	NE	NE	No especificado	NA	NA	NA	NA	NA	NA	NA	NA	NA	NA	NA	NA	NA	NA	NA	NA	NA	NA	NA
12	Guerrero	001	Acapulco de Juárez	0490	Los Triángulos [Granjas]	0994815	170610	0740	Terracería	Conexa a carretera	No hay transporte	No hay transporte	No hay transporte	No hay transporte	Sin hablantes de lengua indígena	Sin hablantes de lengua indígena	Sin hablantes de lengua indígena	Sin hablantes de lengua indígena	Sin hablantes de lengua indígena	Sin hablantes de lengua indígena	Sin hablantes de lengua indígena	Cría y explotación de animales	NE	NE	NO	NO	NO	NO	NO	Sin problema	NA	NA	NA	NA	NA	NA	NA	NA	NA	NA	NA	NA	NA	NA	NA	NA	NA	NA	NA
12	Guerrero	001	Acapulco de Juárez	0491	Agua Zarca de la Peña	0993614	165805	0341	Terracería	Conexa a carretera	No hay transporte	No hay transporte	No hay transporte	No hay transporte	Sin hablantes de lengua indígena	Sin hablantes de lengua indígena	Sin hablantes de lengua indígena	Sin hablantes de lengua indígena	Sin hablantes de lengua indígena	Sin hablantes de lengua indígena	Sin hablantes de lengua indígena	Agricultura	Cría y explotación de animales	NE	SI	NO	SI	NO	NO	Falta de empleo o emigración	NO	Red de agua no disponible	NO	Red de drenaje no disponible	NO	NO	No hay recolección	SI	NO	SI	NO	SI	NO	NO	SI	SI	NO	NO	NO
12	Guerrero	001	Acapulco de Juárez	0493	La Arena	0993514	164544	0069	Pavimentada	Conexa a carretera	No hay transporte	No hay transporte	No hay transporte	No hay transporte	Sin hablantes de lengua indígena	Sin hablantes de lengua indígena	Sin hablantes de lengua indígena	Sin hablantes de lengua indígena	Sin hablantes de lengua indígena	Sin hablantes de lengua indígena	Sin hablantes de lengua indígena	Agricultura	Agricultura	NE	NO	NO	NO	NO	NO	Falta de empleo o emigración	NA	NA	NA	NA	NA	NA	NA	NA	NA	NA	NA	NA	NA	NA	NA	NA	NA	NA	NA
12	Guerrero	001	Acapulco de Juárez	0494	Colonia el Puente de Texca	0994912	165907	0155	Pavimentada	Conexa a carretera	No hay transporte	No hay transporte	No hay transporte	No hay transporte	Sin hablantes de lengua indígena	Sin hablantes de lengua indígena	Sin hablantes de lengua indígena	Sin hablantes de lengua indígena	Sin hablantes de lengua indígena	Sin hablantes de lengua indígena	Sin hablantes de lengua indígena	Agricultura	Insuficientemente especificado del sector transportes	Trabajos de albañilería de instalaciones hidrosanitarias y eléctricas y de trabajos en exteriores	NO	NO	NO	NO	NO	Falta de empleo o emigración	NA	NA	NA	NA	NA	NA	NA	NA	NA	NA	NA	NA	NA	NA	NA	NA	NA	NA	NA
12	Guerrero	001	Acapulco de Juárez	0496	El Jícaro	0995045	165941	0231	Terracería	Conexa a carretera	No hay transporte	No hay transporte	No hay transporte	No hay transporte	Sin hablantes de lengua indígena	Sin hablantes de lengua indígena	Sin hablantes de lengua indígena	Sin hablantes de lengua indígena	Sin hablantes de lengua indígena	Sin hablantes de lengua indígena	Sin hablantes de lengua indígena	Agricultura	NE	NE	NO	NO	NO	NO	NO	Falta de energía eléctrica	NA	NA	NA	NA	NA	NA	NA	NA	NA	NA	NA	NA	NA	NA	NA	NA	NA	NA	NA
12	Guerrero	001	Acapulco de Juárez	0497	El Mamey	0995023	165847	0200	Pavimentada	Conexa a carretera	No hay transporte	No hay transporte	No hay transporte	No hay transporte	Sin hablantes de lengua indígena	Sin hablantes de lengua indígena	Sin hablantes de lengua indígena	Sin hablantes de lengua indígena	Sin hablantes de lengua indígena	Sin hablantes de lengua indígena	Sin hablantes de lengua indígena	Agricultura	NE	NE	NO	NO	NO	NO	NO	Falta de empleo o emigración	NA	NA	NA	NA	NA	NA	NA	NA	NA	NA	NA	NA	NA	NA	NA	NA	NA	NA	NA
12	Guerrero	001	Acapulco de Juárez	0502	Colonia Loma Larga (El Basurero)	0995148	165353	0322	Terracería	Conexa a carretera	Micro, combi o camioneta	De 30 a 60 min	De 6 a 10 salidas al día	De 3 a 6 pesos	Con hablantes de lengua indígena	Mixteco	SI	NO	SI	SI	NO	Manejo de desechos y servicios de remediación	Agricultura	Insuficientemente especificado del sector comercio al por menor	NO	NO	SI	NO	SI	Falta de carretera o transporte	NO	Red de agua no disponible	NO	Red de drenaje no disponible	SI	SI	Depositan la basura a cielo abierto	SI	NO	SI	NO	NO	NO	NO	NO	NO	NO	NO	SI
12	Guerrero	001	Acapulco de Juárez	0503	Colonia Nueva Luz	0995208	165343	0317	Terracería	Conexa a carretera	Micro, combi o camioneta	De 30 a 60 min	De 6 a 10 salidas al día	De 3 a 6 pesos	Con hablantes de lengua indígena	Mixteco	SI	NO	NO	SI	NO	Insuficientemente especificado del sector construcción	Administración pública municipal	Agricultura	NO	NO	NO	NO	NO	Falta de carretera o transporte	NO	Red de agua no disponible	NO	Red de drenaje no disponible	NO	NO	No hay recolección	SI	SI	SI	NO	NO	NO	NO	NO	NO	NO	NO	SI
12	Guerrero	001	Acapulco de Juárez	0504	Colonia Praderas de Guadalupe	0995151	165331	0297	Terracería	Conexa a carretera	Micro, combi o camioneta	De 30 a 60 min	De 6 a 10 salidas al día	De 3 a 6 pesos	Sin hablantes de lengua indígena	Sin hablantes de lengua indígena	Sin hablantes de lengua indígena	Sin hablantes de lengua indígena	Sin hablantes de lengua indígena	Sin hablantes de lengua indígena	Sin hablantes de lengua indígena	Transporte terrestre de pasajeros, excepto por ferrocarril	Parques con instalaciones recreativas y casas de juegos electrónicos	Insuficientemente especificado del sector construcción	SI	NO	SI	NO	SI	Falta de otros servicios o equipamiento	NO	Red de agua no disponible	NO	Red de drenaje no disponible	NO	SI	Depositan la basura a cielo abierto	SI	NO	SI	NO	NO	NO	NO	NO	NO	NO	NO	SI
12	Guerrero	001	Acapulco de Juárez	0505	Colonia Coheteros	0995139	165308	0387	Terracería	Conexa a carretera	Micro, combi o camioneta	De 20 a 24 min	De 6 a 10 salidas al día	De 3 a 6 pesos	Sin hablantes de lengua indígena	Sin hablantes de lengua indígena	Sin hablantes de lengua indígena	Sin hablantes de lengua indígena	Sin hablantes de lengua indígena	Sin hablantes de lengua indígena	Sin hablantes de lengua indígena	Insuficientemente especificado del sector construcción	Hogares con empleados domésticos	NE	NO	NO	NO	NO	NO	Falta de carretera o transporte	NA	NA	NA	NA	NA	NA	NA	NA	NA	NA	NA	NA	NA	NA	NA	NA	NA	NA	NA
12	Guerrero	001	Acapulco de Juárez	0507	Ampliación Frontera	0994857	165331	0020	No conexa a carretera	De 1 a 3 km	Disponibilidad de transporte NE	Disponibilidad de transporte NE	Disponibilidad de transporte NE	Disponibilidad de transporte NE	Con hablantes de lengua indígena	Náhuatl	SI	SI	NO	SI	SI	Insuficientemente especificado del sector construcción	Agricultura	NE	NO	NO	NO	NO	NO	Sequía, inundaciones o clima adverso	NE	Disponibilidad de red de agua NE	NE	Disponibilidad NE	NE	NE	Recolección y limpieza NE	NE	NE	NE	NE	NE	NE	NE	NE	NE	NE	NE	NE
12	Guerrero	001	Acapulco de Juárez	0509	Las Bugambilias	0994835	165252	0017	Pavimentada	Conexa a carretera	No hay transporte	No hay transporte	No hay transporte	No hay transporte	Sin hablantes de lengua indígena	Sin hablantes de lengua indígena	Sin hablantes de lengua indígena	Sin hablantes de lengua indígena	Sin hablantes de lengua indígena	Sin hablantes de lengua indígena	Sin hablantes de lengua indígena	Agricultura	NE	NE	NO	NO	NO	NO	NO	Delincuencia o inseguridad	NA	NA	NA	NA	NA	NA	NA	NA	NA	NA	NA	NA	NA	NA	NA	NA	NA	NA	NA
12	Guerrero	001	Acapulco de Juárez	0557	La Casa del Anciano	0994319	164901	0001	Terracería	Conexa a carretera	No hay transporte	No hay transporte	No hay transporte	No hay transporte	Sin hablantes de lengua indígena	Sin hablantes de lengua indígena	Sin hablantes de lengua indígena	Sin hablantes de lengua indígena	Sin hablantes de lengua indígena	Sin hablantes de lengua indígena	Sin hablantes de lengua indígena	Agricultura	NE	NE	NO	NO	NO	NO	NO	Sequía, inundaciones o clima adverso	NA	NA	NA	NA	NA	NA	NA	NA	NA	NA	NA	NA	NA	NA	NA	NA	NA	NA	NA
12	Guerrero	001	Acapulco de Juárez	0560	Colonia Independencia	0994831	165335	0036	Terracería	Conexa a carretera	Disponibilidad de transporte NE	Disponibilidad de transporte NE	Disponibilidad de transporte NE	Disponibilidad de transporte NE	Sin hablantes de lengua indígena	Sin hablantes de lengua indígena	Sin hablantes de lengua indígena	Sin hablantes de lengua indígena	Sin hablantes de lengua indígena	Sin hablantes de lengua indígena	Sin hablantes de lengua indígena	Transporte terrestre de pasajeros, excepto por ferrocarril	Trabajos de albañilería de instalaciones hidrosanitarias y eléctricas y de trabajos en exteriores	Fabricación de productos metálicos	NO	NO	NO	NO	SI	Falta de drenaje y alcantarillado	NA	NA	NA	NA	NA	NA	NA	NA	NA	NA	NA	NA	NA	NA	NA	NA	NA	NA	NA
12	Guerrero	001	Acapulco de Juárez	0561	Colonia Dieciséis de Noviembre	0994833	165322	0021	No conexa a carretera	Distancia NE	Micro, combi o camioneta	De 30 a 60 min	De 31 a 60 salidas al día	De 10 a 14 pesos	Con hablantes de lengua indígena	Náhuatl	SI	SI	NO	SI	SI	Insuficientemente especificado del sector construcción	Pesca	Agricultura	SI	NO	NO	SI	SI	Falta de energía eléctrica	NE	Disponibilidad de red de agua NE	NE	Disponibilidad NE	NE	NE	Recolección y limpieza NE	NE	NE	NE	NE	NE	NE	NE	NE	NE	NE	NE	NE
12	Guerrero	001	Acapulco de Juárez	0562	Colonia Ladrillera (La Pilastra)	0994851	165256	0017	Pavimentada	Conexa a carretera	No hay transporte	No hay transporte	No hay transporte	No hay transporte	Sin hablantes de lengua indígena	Sin hablantes de lengua indígena	Sin hablantes de lengua indígena	Sin hablantes de lengua indígena	Sin hablantes de lengua indígena	Sin hablantes de lengua indígena	Sin hablantes de lengua indígena	Insuficientemente especificado del sector construcción	NE	NE	NO	NO	NO	SI	SI	Falta de energía eléctrica	NA	NA	NA	NA	NA	NA	NA	NA	NA	NA	NA	NA	NA	NA	NA	NA	NA	NA	NA
12	Guerrero	001	Acapulco de Juárez	0563	Colonia la Esperanza	0994818	165250	0017	Pavimentada	Conexa a carretera	Micro, combi o camioneta	De 30 a 60 min	De 21 a 30 salidas al día	De 20 a 24 pesos	Sin hablantes de lengua indígena	Sin hablantes de lengua indígena	Sin hablantes de lengua indígena	Sin hablantes de lengua indígena	Sin hablantes de lengua indígena	Sin hablantes de lengua indígena	Sin hablantes de lengua indígena	Servicios de alojamiento temporal	NE	NE	NO	NO	NO	SI	SI	Delincuencia o inseguridad	NA	NA	NA	NA	NA	NA	NA	NA	NA	NA	NA	NA	NA	NA	NA	NA	NA	NA	NA
12	Guerrero	001	Acapulco de Juárez	0566	Colonia Miguel Terrazas Rivera	0994845	165312	0020	Terracería	Conexa a carretera	Micro, combi o camioneta	DE 15 A 19 MIN	De 21 a 30 salidas al día	De 3 a 6 pesos	Sin hablantes de lengua indígena	Sin hablantes de lengua indígena	Sin hablantes de lengua indígena	Sin hablantes de lengua indígena	Sin hablantes de lengua indígena	Sin hablantes de lengua indígena	Sin hablantes de lengua indígena	Industria de la madera	Agricultura	Servicios de limpieza y de instalación y mantenimiento de áreas verdes	NO	NO	NO	SI	SI	Falta de infraestructura o servicio de agua	NO	Red de agua no disponible	NO	Red de drenaje no disponible	NO	NO	No hay recolección	SI	NO	NO	NO	NO	NO	NO	NO	NO	NO	NO	SI
12	Guerrero	001	Acapulco de Juárez	0568	Colonia Nueva Generación	0994903	165309	0020	Pavimentada	Conexa a carretera	No hay transporte	No hay transporte	No hay transporte	No hay transporte	Con hablantes de lengua indígena	Mixteco	SI	NO	NO	NO	NO	Insuficientemente especificado del sector construcción	NE	NE	SI	NO	NO	NO	SI	Falta de empleo o emigración	NO	Red de agua no disponible	NO	Red de drenaje no disponible	NO	NO	No hay recolección	SI	NO	NO	NO	NO	NO	NO	NO	NO	NO	NO	SI
12	Guerrero	001	Acapulco de Juárez	0570	Colonia Rubén Figueroa Alcocer	0994839	165321	0020	Terracería	Conexa a carretera	Micro, combi o camioneta	De 20 a 24 min	De 31 a 60 salidas al día	De 10 a 14 pesos	Con hablantes de lengua indígena	Zapoteco	SI	NO	NO	NO	NO	Insuficientemente especificado del sector construcción	Agricultura	NE	NO	NO	NO	SI	SI	Delincuencia o inseguridad	NO	Red de agua no disponible	NO	Red de drenaje no disponible	NO	NO	No hay recolección	NO	NO	NO	NO	NO	NO	NO	NO	NO	NO	NO	SI
12	Guerrero	001	Acapulco de Juárez	0573	Colonia Vista Hermosa de las Flores	0994546	164952	0001	Pavimentada	Conexa a carretera	No hay transporte	No hay transporte	No hay transporte	No hay transporte	Sin hablantes de lengua indígena	Sin hablantes de lengua indígena	Sin hablantes de lengua indígena	Sin hablantes de lengua indígena	Sin hablantes de lengua indígena	Sin hablantes de lengua indígena	Sin hablantes de lengua indígena	Agricultura	Agricultura	NE	NO	NO	NO	NO	NO	Otra clase de problema	SI	Disponible sin cobro	NO	Red de drenaje no disponible	NO	SI	Desalojan la basura a otro lugar	SI	NO	NO	NO	NO	NO	NO	NO	NO	NO	NO	SI
12	Guerrero	001	Acapulco de Juárez	0574	Colonia la Frontera Aguacatillo	0994807	165724	0117	Pavimentada	Conexa a carretera	No hay transporte	No hay transporte	No hay transporte	No hay transporte	Sin hablantes de lengua indígena	Sin hablantes de lengua indígena	Sin hablantes de lengua indígena	Sin hablantes de lengua indígena	Sin hablantes de lengua indígena	Sin hablantes de lengua indígena	Sin hablantes de lengua indígena	Agricultura	Servicios de alojamiento temporal	Trabajos de albañilería de instalaciones hidrosanitarias y eléctricas y de trabajos en exteriores	NO	SI	NO	NO	SI	Falta de empleo o emigración	NO	Red de agua no disponible	NO	Red de drenaje no disponible	NO	SI	Entierran la basura	SI	SI	SI	SI	NO	SI	NO	NO	NO	NO	NO	SI
12	Guerrero	001	Acapulco de Juárez	0578	Huerta Eusebio Sequeida	0994806	165314	0027	Terracería	Conexa a carretera	Micro, combi o camioneta	De 20 a 24 min	De 31 a 60 salidas al día	De 10 a 14 pesos	Sin hablantes de lengua indígena	Sin hablantes de lengua indígena	Sin hablantes de lengua indígena	Sin hablantes de lengua indígena	Sin hablantes de lengua indígena	Sin hablantes de lengua indígena	Sin hablantes de lengua indígena	Agricultura	Insuficientemente especificado del sector comercio al por menor	NE	NO	NO	NO	NO	NO	Falta de infraestructura o servicio de agua	NA	NA	NA	NA	NA	NA	NA	NA	NA	NA	NA	NA	NA	NA	NA	NA	NA	NA	NA
12	Guerrero	001	Acapulco de Juárez	0581	Huerta Marcial Contreras	0994826	165334	0036	Terracería	Conexa a carretera	No hay transporte	No hay transporte	No hay transporte	No hay transporte	Sin hablantes de lengua indígena	Sin hablantes de lengua indígena	Sin hablantes de lengua indígena	Sin hablantes de lengua indígena	Sin hablantes de lengua indígena	Sin hablantes de lengua indígena	Sin hablantes de lengua indígena	Insuficientemente especificado del sector comercio al por menor	Agricultura	Cría y explotación de animales	NO	NO	NO	NO	NO	Sin problema	NA	NA	NA	NA	NA	NA	NA	NA	NA	NA	NA	NA	NA	NA	NA	NA	NA	NA	NA
12	Guerrero	001	Acapulco de Juárez	0582	Colonia Monte Sinaí	0994042	164902	0058	Pavimentada	Conexa a carretera	Micro, combi o camioneta	Más de 1 y hasta 1.5 horas	Más de 60 salidas	De 10 a 14 pesos	Con hablantes de lengua indígena	Náhuatl	SI	NO	NO	NO	NO	Insuficientemente especificado del sector construcción	Cría y explotación de animales	NE	NO	NO	NO	NO	NO	Falta de infraestructura o servicio de agua	NA	NA	NA	NA	NA	NA	NA	NA	NA	NA	NA	NA	NA	NA	NA	NA	NA	NA	NA
12	Guerrero	001	Acapulco de Juárez	0585	Rancho Félix Lorenzo Martínez	0994812	165227	0017	Pavimentada	Conexa a carretera	No hay transporte	No hay transporte	No hay transporte	No hay transporte	Sin hablantes de lengua indígena	Sin hablantes de lengua indígena	Sin hablantes de lengua indígena	Sin hablantes de lengua indígena	Sin hablantes de lengua indígena	Sin hablantes de lengua indígena	Sin hablantes de lengua indígena	Cría y explotación de animales	NE	NE	NO	NO	NO	NO	NO	Falta de otros servicios o equipamiento	NA	NA	NA	NA	NA	NA	NA	NA	NA	NA	NA	NA	NA	NA	NA	NA	NA	NA	NA
12	Guerrero	001	Acapulco de Juárez	0586	Rancho Juan Muñoz	0994832	165247	0017	Pavimentada	Conexa a carretera	No hay transporte	No hay transporte	No hay transporte	No hay transporte	Sin hablantes de lengua indígena	Sin hablantes de lengua indígena	Sin hablantes de lengua indígena	Sin hablantes de lengua indígena	Sin hablantes de lengua indígena	Sin hablantes de lengua indígena	Sin hablantes de lengua indígena	Agricultura	Cría y explotación de animales	NE	NO	NO	NO	SI	SI	Falta de empleo o emigración	NA	NA	NA	NA	NA	NA	NA	NA	NA	NA	NA	NA	NA	NA	NA	NA	NA	NA	NA
12	Guerrero	001	Acapulco de Juárez	0587	Rancho las Marías	0993736	165431	0054	Terracería	Conexa a carretera	No hay transporte	No hay transporte	No hay transporte	No hay transporte	Sin hablantes de lengua indígena	Sin hablantes de lengua indígena	Sin hablantes de lengua indígena	Sin hablantes de lengua indígena	Sin hablantes de lengua indígena	Sin hablantes de lengua indígena	Sin hablantes de lengua indígena	Agricultura	Cría y explotación de animales	Insuficientemente especificado del sector construcción	NO	NO	NO	NO	NO	Pobreza o marginación	NE	Disponibilidad de red de agua NE	NE	Disponibilidad NE	NE	NE	Recolección y limpieza NE	NE	NE	NE	NE	NE	NE	NE	NE	NE	NE	NE	NE
12	Guerrero	001	Acapulco de Juárez	0588	Rancho María Angelina Carmona	0994254	164907	0016	Terracería	Conexa a carretera	No hay transporte	No hay transporte	No hay transporte	No hay transporte	Sin hablantes de lengua indígena	Sin hablantes de lengua indígena	Sin hablantes de lengua indígena	Sin hablantes de lengua indígena	Sin hablantes de lengua indígena	Sin hablantes de lengua indígena	Sin hablantes de lengua indígena	Cría y explotación de animales	NE	NE	NO	NO	NO	NO	NO	Falta de otros servicios o equipamiento	NA	NA	NA	NA	NA	NA	NA	NA	NA	NA	NA	NA	NA	NA	NA	NA	NA	NA	NA
12	Guerrero	001	Acapulco de Juárez	0591	Huerta Marcial Muñoz Silva	0994820	165241	0017	Pavimentada	Conexa a carretera	No hay transporte	No hay transporte	No hay transporte	No hay transporte	Sin hablantes de lengua indígena	Sin hablantes de lengua indígena	Sin hablantes de lengua indígena	Sin hablantes de lengua indígena	Sin hablantes de lengua indígena	Sin hablantes de lengua indígena	Sin hablantes de lengua indígena	Agricultura	Cría y explotación de animales	NE	NO	NO	NO	NO	NO	Falta de equipamiento o servicios de salud	NA	NA	NA	NA	NA	NA	NA	NA	NA	NA	NA	NA	NA	NA	NA	NA	NA	NA	NA
12	Guerrero	001	Acapulco de Juárez	0592	Huerta Ignacio Cuevas	0994729	165224	0017	Pavimentada	Conexa a carretera	No hay transporte	No hay transporte	No hay transporte	No hay transporte	Sin hablantes de lengua indígena	Sin hablantes de lengua indígena	Sin hablantes de lengua indígena	Sin hablantes de lengua indígena	Sin hablantes de lengua indígena	Sin hablantes de lengua indígena	Sin hablantes de lengua indígena	Agricultura	NE	NE	NO	NO	NO	NO	NO	Pobreza o marginación	NA	NA	NA	NA	NA	NA	NA	NA	NA	NA	NA	NA	NA	NA	NA	NA	NA	NA	NA
12	Guerrero	001	Acapulco de Juárez	0596	Huerta Ricardo Mendoza	0994825	165321	0024	No conexa a carretera	De 1 a 3 km	No hay transporte	No hay transporte	No hay transporte	No hay transporte	Sin hablantes de lengua indígena	Sin hablantes de lengua indígena	Sin hablantes de lengua indígena	Sin hablantes de lengua indígena	Sin hablantes de lengua indígena	Sin hablantes de lengua indígena	Sin hablantes de lengua indígena	Agricultura	NE	NE	NO	NO	NO	NO	NO	Sin problema	NA	NA	NA	NA	NA	NA	NA	NA	NA	NA	NA	NA	NA	NA	NA	NA	NA	NA	NA
12	Guerrero	001	Acapulco de Juárez	0597	Huerta Ubaldo Murillo Balanzar	0994733	165209	0017	Pavimentada	Conexa a carretera	No hay transporte	No hay transporte	No hay transporte	No hay transporte	Sin hablantes de lengua indígena	Sin hablantes de lengua indígena	Sin hablantes de lengua indígena	Sin hablantes de lengua indígena	Sin hablantes de lengua indígena	Sin hablantes de lengua indígena	Sin hablantes de lengua indígena	Agricultura	NE	NE	NO	NO	NO	NO	SI	Falta de infraestructura o servicio de agua	NA	NA	NA	NA	NA	NA	NA	NA	NA	NA	NA	NA	NA	NA	NA	NA	NA	NA	NA
12	Guerrero	001	Acapulco de Juárez	0598	Rancho Domingo Villanueva	0994317	164846	0004	Terracería	Conexa a carretera	No hay transporte	No hay transporte	No hay transporte	No hay transporte	Sin hablantes de lengua indígena	Sin hablantes de lengua indígena	Sin hablantes de lengua indígena	Sin hablantes de lengua indígena	Sin hablantes de lengua indígena	Sin hablantes de lengua indígena	Sin hablantes de lengua indígena	Agricultura	Cría y explotación de animales	NE	NO	NO	NO	SI	NO	Delincuencia o inseguridad	NA	NA	NA	NA	NA	NA	NA	NA	NA	NA	NA	NA	NA	NA	NA	NA	NA	NA	NA
12	Guerrero	001	Acapulco de Juárez	0604	El Cerrito (Colonia el Cerrito)	0993249	165353	0204	Terracería	Conexa a carretera	No hay transporte	No hay transporte	No hay transporte	No hay transporte	Sin hablantes de lengua indígena	Sin hablantes de lengua indígena	Sin hablantes de lengua indígena	Sin hablantes de lengua indígena	Sin hablantes de lengua indígena	Sin hablantes de lengua indígena	Sin hablantes de lengua indígena	Agricultura	Cría y explotación de animales	NE	NO	NO	NO	NO	NO	Falta de infraestructura o servicio de agua	NA	NA	NA	NA	NA	NA	NA	NA	NA	NA	NA	NA	NA	NA	NA	NA	NA	NA	NA
12	Guerrero	001	Acapulco de Juárez	0605	Colonia Acapulco Dos Mil	0994837	165335	0023	Terracería	Conexa a carretera	Disponibilidad de transporte NE	Disponibilidad de transporte NE	Disponibilidad de transporte NE	Disponibilidad de transporte NE	Sin hablantes de lengua indígena	Sin hablantes de lengua indígena	Sin hablantes de lengua indígena	Sin hablantes de lengua indígena	Sin hablantes de lengua indígena	Sin hablantes de lengua indígena	Sin hablantes de lengua indígena	Insuficientemente especificado del sector construcción	Fabricación de productos metálicos	Agricultura	SI	NO	NO	SI	SI	Falta de otros servicios o equipamiento	NA	NA	NA	NA	NA	NA	NA	NA	NA	NA	NA	NA	NA	NA	NA	NA	NA	NA	NA
12	Guerrero	001	Acapulco de Juárez	0607	Colonia Ángel Heladio Aguirre Rivero	0994800	165303	0021	Terracería	Conexa a carretera	No hay transporte	No hay transporte	No hay transporte	No hay transporte	Sin hablantes de lengua indígena	Sin hablantes de lengua indígena	Sin hablantes de lengua indígena	Sin hablantes de lengua indígena	Sin hablantes de lengua indígena	Sin hablantes de lengua indígena	Sin hablantes de lengua indígena	Industria de la madera	Transporte terrestre de pasajeros, excepto por ferrocarril	Fabricación de productos metálicos	NO	NO	NO	SI	NO	Falta de drenaje y alcantarillado	NE	Disponibilidad de red de agua NE	NE	Disponibilidad NE	NE	NE	Recolección y limpieza NE	NE	NE	NE	NE	NE	NE	NE	NE	NE	NE	NE	NE
12	Guerrero	001	Acapulco de Juárez	0608	Colonia Mariano Molina	0994809	165244	0017	Pavimentada	Conexa a carretera	Micro, combi o camioneta	De 30 a 60 min	De 21 a 30 salidas al día	De 20 a 24 pesos	Sin hablantes de lengua indígena	Sin hablantes de lengua indígena	Sin hablantes de lengua indígena	Sin hablantes de lengua indígena	Sin hablantes de lengua indígena	Sin hablantes de lengua indígena	Sin hablantes de lengua indígena	Insuficientemente especificado del sector construcción	NE	NE	NO	NO	NO	SI	SI	Falta de empleo o emigración	NA	NA	NA	NA	NA	NA	NA	NA	NA	NA	NA	NA	NA	NA	NA	NA	NA	NA	NA
12	Guerrero	001	Acapulco de Juárez	0609	Colonia Seis de Agosto	0993440	165358	0184	Terracería	Conexa a carretera	No hay transporte	No hay transporte	No hay transporte	No hay transporte	Sin hablantes de lengua indígena	Sin hablantes de lengua indígena	Sin hablantes de lengua indígena	Sin hablantes de lengua indígena	Sin hablantes de lengua indígena	Sin hablantes de lengua indígena	Sin hablantes de lengua indígena	Agricultura	Cría y explotación de animales	NE	NO	NO	NO	NO	NO	Falta de empleo o emigración	NA	NA	NA	NA	NA	NA	NA	NA	NA	NA	NA	NA	NA	NA	NA	NA	NA	NA	NA
12	Guerrero	001	Acapulco de Juárez	0611	Colonia Valle Encantado	0994628	165141	0018	Pavimentada	Conexa a carretera	No hay transporte	No hay transporte	No hay transporte	No hay transporte	Sin hablantes de lengua indígena	Sin hablantes de lengua indígena	Sin hablantes de lengua indígena	Sin hablantes de lengua indígena	Sin hablantes de lengua indígena	Sin hablantes de lengua indígena	Sin hablantes de lengua indígena	Agricultura	NE	NE	SI	NO	NO	SI	NO	Falta de infraestructura o servicio de agua	NA	NA	NA	NA	NA	NA	NA	NA	NA	NA	NA	NA	NA	NA	NA	NA	NA	NA	NA
12	Guerrero	001	Acapulco de Juárez	0613	Huerta el Uno (Antonio Bucio Hortes)	0994253	164901	0014	Terracería	Conexa a carretera	Disponibilidad de transporte NE	Disponibilidad de transporte NE	Disponibilidad de transporte NE	Disponibilidad de transporte NE	Sin hablantes de lengua indígena	Sin hablantes de lengua indígena	Sin hablantes de lengua indígena	Sin hablantes de lengua indígena	Sin hablantes de lengua indígena	Sin hablantes de lengua indígena	Sin hablantes de lengua indígena	Agricultura	Insuficientemente especificado del sector comercio al por menor	NE	NO	NO	NO	NO	NO	Sequía, inundaciones o clima adverso	NA	NA	NA	NA	NA	NA	NA	NA	NA	NA	NA	NA	NA	NA	NA	NA	NA	NA	NA
12	Guerrero	001	Acapulco de Juárez	0614	Huerta Francisca Dimayuga Mendoza	0994840	165243	0017	Pavimentada	Conexa a carretera	No hay transporte	No hay transporte	No hay transporte	No hay transporte	Sin hablantes de lengua indígena	Sin hablantes de lengua indígena	Sin hablantes de lengua indígena	Sin hablantes de lengua indígena	Sin hablantes de lengua indígena	Sin hablantes de lengua indígena	Sin hablantes de lengua indígena	Agricultura	NE	NE	NO	NO	NO	SI	SI	Falta de empleo o emigración	NA	NA	NA	NA	NA	NA	NA	NA	NA	NA	NA	NA	NA	NA	NA	NA	NA	NA	NA
12	Guerrero	001	Acapulco de Juárez	0615	Huerta Gilberto Zequeida Viviano	0994805	165234	0017	Pavimentada	Conexa a carretera	No hay transporte	No hay transporte	No hay transporte	No hay transporte	Sin hablantes de lengua indígena	Sin hablantes de lengua indígena	Sin hablantes de lengua indígena	Sin hablantes de lengua indígena	Sin hablantes de lengua indígena	Sin hablantes de lengua indígena	Sin hablantes de lengua indígena	Agricultura	NE	NE	NO	NO	NO	NO	NO	Falta de drenaje y alcantarillado	NA	NA	NA	NA	NA	NA	NA	NA	NA	NA	NA	NA	NA	NA	NA	NA	NA	NA	NA
12	Guerrero	001	Acapulco de Juárez	0616	Huerta Pilita	0994243	164908	0017	Pavimentada	Conexa a carretera	No hay transporte	No hay transporte	No hay transporte	No hay transporte	Sin hablantes de lengua indígena	Sin hablantes de lengua indígena	Sin hablantes de lengua indígena	Sin hablantes de lengua indígena	Sin hablantes de lengua indígena	Sin hablantes de lengua indígena	Sin hablantes de lengua indígena	Fabricación de productos a base de minerales no metálicos	Agricultura	NE	NO	NO	NO	NO	NO	Sequía, inundaciones o clima adverso	NA	NA	NA	NA	NA	NA	NA	NA	NA	NA	NA	NA	NA	NA	NA	NA	NA	NA	NA
12	Guerrero	001	Acapulco de Juárez	0618	Maguey Uno	0994716	165154	0017	Terracería	Conexa a carretera	No hay transporte	No hay transporte	No hay transporte	No hay transporte	Sin hablantes de lengua indígena	Sin hablantes de lengua indígena	Sin hablantes de lengua indígena	Sin hablantes de lengua indígena	Sin hablantes de lengua indígena	Sin hablantes de lengua indígena	Sin hablantes de lengua indígena	Agricultura	NE	NE	NO	NO	NO	NO	NO	Falta de carretera o transporte	NA	NA	NA	NA	NA	NA	NA	NA	NA	NA	NA	NA	NA	NA	NA	NA	NA	NA	NA
12	Guerrero	001	Acapulco de Juárez	0620	Rancho Don Arnulfo	0994841	165255	0017	Pavimentada	Conexa a carretera	No hay transporte	No hay transporte	No hay transporte	No hay transporte	Sin hablantes de lengua indígena	Sin hablantes de lengua indígena	Sin hablantes de lengua indígena	Sin hablantes de lengua indígena	Sin hablantes de lengua indígena	Sin hablantes de lengua indígena	Sin hablantes de lengua indígena	Insuficientemente especificado del sector comercio al por menor	NE	NE	NO	NO	NO	SI	NO	Falta de drenaje y alcantarillado	NA	NA	NA	NA	NA	NA	NA	NA	NA	NA	NA	NA	NA	NA	NA	NA	NA	NA	NA
12	Guerrero	001	Acapulco de Juárez	0621	Rancho Eusebio Sequeida Ozuna	0994836	165245	0017	Terracería	Conexa a carretera	No hay transporte	No hay transporte	No hay transporte	No hay transporte	Sin hablantes de lengua indígena	Sin hablantes de lengua indígena	Sin hablantes de lengua indígena	Sin hablantes de lengua indígena	Sin hablantes de lengua indígena	Sin hablantes de lengua indígena	Sin hablantes de lengua indígena	Agricultura	NE	NE	NO	NO	NO	SI	SI	Falta de empleo o emigración	NA	NA	NA	NA	NA	NA	NA	NA	NA	NA	NA	NA	NA	NA	NA	NA	NA	NA	NA
12	Guerrero	001	Acapulco de Juárez	0626	Colonia Villa Guerrero	0995142	165316	0348	Terracería	Conexa a carretera	Micro, combi o camioneta	De 10 a 14 min	De 6 a 10 salidas al día	De 3 a 6 pesos	Con hablantes de lengua indígena	Náhuatl	SI	NO	NO	SI	NO	Insuficientemente especificado del sector comercio al por menor	Trabajan en otra localidad	NE	NO	NO	NO	SI	SI	Falta de carretera o transporte	NA	NA	NA	NA	NA	NA	NA	NA	NA	NA	NA	NA	NA	NA	NA	NA	NA	NA	NA
12	Guerrero	001	Acapulco de Juárez	0628	Rancho el Capricho	0995013	170718	0839	Pavimentada	Conexa a carretera	No hay transporte	No hay transporte	No hay transporte	No hay transporte	Sin hablantes de lengua indígena	Sin hablantes de lengua indígena	Sin hablantes de lengua indígena	Sin hablantes de lengua indígena	Sin hablantes de lengua indígena	Sin hablantes de lengua indígena	Sin hablantes de lengua indígena	Agricultura	Cría y explotación de animales	NE	NO	NO	NO	NO	NO	Pobreza o marginación	NA	NA	NA	NA	NA	NA	NA	NA	NA	NA	NA	NA	NA	NA	NA	NA	NA	NA	NA
12	Guerrero	001	Acapulco de Juárez	0637	Colonia Ampliación los Lirios Parte Alta	0995011	165228	0212	Terracería	Conexa a carretera	No hay transporte	No hay transporte	No hay transporte	No hay transporte	Sin hablantes de lengua indígena	Sin hablantes de lengua indígena	Sin hablantes de lengua indígena	Sin hablantes de lengua indígena	Sin hablantes de lengua indígena	Sin hablantes de lengua indígena	Sin hablantes de lengua indígena	Trabajan en otra localidad	NE	NE	NO	NO	NO	NO	NO	Falta de otros servicios o equipamiento	NA	NA	NA	NA	NA	NA	NA	NA	NA	NA	NA	NA	NA	NA	NA	NA	NA	NA	NA
12	Guerrero	001	Acapulco de Juárez	0658	Colonia Alborada	0994852	165250	0017	Pavimentada	Conexa a carretera	No hay transporte	No hay transporte	No hay transporte	No hay transporte	Sin hablantes de lengua indígena	Sin hablantes de lengua indígena	Sin hablantes de lengua indígena	Sin hablantes de lengua indígena	Sin hablantes de lengua indígena	Sin hablantes de lengua indígena	Sin hablantes de lengua indígena	Edificación no residencial	NE	NE	NO	NO	NO	SI	SI	Falta de empleo o emigración	NO	Red de agua no disponible	NO	Red de drenaje no disponible	NO	NO	No hay recolección	SI	NO	NO	SI	NO	NO	NO	NO	NO	NO	NO	SI
12	Guerrero	001	Acapulco de Juárez	0663	Tunzingo [Unidad Habitacional]	0994655	165019	0001	Pavimentada	Conexa a carretera	Taxi	De 30 a 60 min	Más de 60 salidas	De 10 a 14 pesos	Sin hablantes de lengua indígena	Sin hablantes de lengua indígena	Sin hablantes de lengua indígena	Sin hablantes de lengua indígena	Sin hablantes de lengua indígena	Sin hablantes de lengua indígena	Sin hablantes de lengua indígena	Insuficientemente especificado del sector construcción	Fabricación de productos metálicos	Trabajos de albañilería de instalaciones hidrosanitarias y eléctricas y de trabajos en exteriores	NO	NO	NO	SI	SI	Alcoholismo o drogadicción	NO	Red de agua no disponible	NO	Red de drenaje no disponible	NO	SI	Desalojan la basura a otro lugar	SI	NO	NO	NO	NO	NO	NO	NO	NO	NO	NO	SI
12	Guerrero	001	Acapulco de Juárez	0665	La Lomita [Restaurante]	0994703	165037	0007	Pavimentada	Conexa a carretera	Taxi	De 30 a 60 min	Más de 60 salidas	De 10 a 14 pesos	Sin hablantes de lengua indígena	Sin hablantes de lengua indígena	Sin hablantes de lengua indígena	Sin hablantes de lengua indígena	Sin hablantes de lengua indígena	Sin hablantes de lengua indígena	Sin hablantes de lengua indígena	Agricultura	NE	NE	NO	NO	NO	NO	SI	Pobreza o marginación	NA	NA	NA	NA	NA	NA	NA	NA	NA	NA	NA	NA	NA	NA	NA	NA	NA	NA	NA
12	Guerrero	001	Acapulco de Juárez	0672	Ciénega del Cuastololote	0994721	170646	0754	Terracería	Conexa a carretera	No hay transporte	No hay transporte	No hay transporte	No hay transporte	Sin hablantes de lengua indígena	Sin hablantes de lengua indígena	Sin hablantes de lengua indígena	Sin hablantes de lengua indígena	Sin hablantes de lengua indígena	Sin hablantes de lengua indígena	Sin hablantes de lengua indígena	Agricultura	Cría y explotación de animales	NE	NO	NO	NO	NO	NO	Falta de infraestructura o servicio de agua	NA	NA	NA	NA	NA	NA	NA	NA	NA	NA	NA	NA	NA	NA	NA	NA	NA	NA	NA
12	Guerrero	001	Acapulco de Juárez	0674	Granjas de Campo Rojo	0994931	170717	0812	Pavimentada	Conexa a carretera	No hay transporte	No hay transporte	No hay transporte	No hay transporte	Sin hablantes de lengua indígena	Sin hablantes de lengua indígena	Sin hablantes de lengua indígena	Sin hablantes de lengua indígena	Sin hablantes de lengua indígena	Sin hablantes de lengua indígena	Sin hablantes de lengua indígena	Cría y explotación de animales	NE	NE	NO	NO	NO	NO	NO	Pobreza o marginación	NA	NA	NA	NA	NA	NA	NA	NA	NA	NA	NA	NA	NA	NA	NA	NA	NA	NA	NA
12	Guerrero	001	Acapulco de Juárez	0681	Rancho Campo Rojo	0994847	170633	0763	NDAI	NDAI	NDAI	NDAI	NDAI	NDAI	NDAI	NDAI	NDAI	NDAI	NDAI	NDAI	NDAI	NDAI	NDAI	NDAI	NDAI	NDAI	NDAI	NDAI	NDAI	No especificado	NA	NA	NA	NA	NA	NA	NA	NA	NA	NA	NA	NA	NA	NA	NA	NA	NA	NA	NA
12	Guerrero	001	Acapulco de Juárez	0683	Colonia Nueva Revolución	0994821	165354	0038	No conexa a carretera	Distancia NE	Micro, combi o camioneta	De 30 a 60 min	De 31 a 60 salidas al día	De 3 a 6 pesos	Sin hablantes de lengua indígena	Sin hablantes de lengua indígena	Sin hablantes de lengua indígena	Sin hablantes de lengua indígena	Sin hablantes de lengua indígena	Sin hablantes de lengua indígena	Sin hablantes de lengua indígena	Transporte terrestre de pasajeros, excepto por ferrocarril	Trabajos de albañilería de instalaciones hidrosanitarias y eléctricas y de trabajos en exteriores	NE	NO	SI	NO	NO	SI	Falta de carretera o transporte	NO	Red de agua no disponible	NO	Red de drenaje no disponible	NO	SI	Desalojan la basura a otro lugar	SI	NO	SI	NO	NO	NO	NO	NO	NO	NO	NO	SI
12	Guerrero	001	Acapulco de Juárez	0686	Huerta Carmela Rivera Terrazas	0994852	165337	0019	No conexa a carretera	De 1 a 3 km	No hay transporte	No hay transporte	No hay transporte	No hay transporte	Sin hablantes de lengua indígena	Sin hablantes de lengua indígena	Sin hablantes de lengua indígena	Sin hablantes de lengua indígena	Sin hablantes de lengua indígena	Sin hablantes de lengua indígena	Sin hablantes de lengua indígena	Insuficientemente especificado del sector comercio al por menor	NE	NE	NO	NO	NO	NO	NO	Sin problema	NA	NA	NA	NA	NA	NA	NA	NA	NA	NA	NA	NA	NA	NA	NA	NA	NA	NA	NA
12	Guerrero	001	Acapulco de Juárez	0687	Huerta Marcelino Flores Bailón	0994713	164950	0001	No conexa a carretera	Distancia NE	No hay transporte	No hay transporte	No hay transporte	No hay transporte	Sin hablantes de lengua indígena	Sin hablantes de lengua indígena	Sin hablantes de lengua indígena	Sin hablantes de lengua indígena	Sin hablantes de lengua indígena	Sin hablantes de lengua indígena	Sin hablantes de lengua indígena	NE	NE	NE	NO	NE	NO	SI	NO	No especificado	NA	NA	NA	NA	NA	NA	NA	NA	NA	NA	NA	NA	NA	NA	NA	NA	NA	NA	NA
12	Guerrero	001	Acapulco de Juárez	0689	José Francisco Martínez Clark	0994833	165351	0037	No conexa a carretera	De 1 a 3 km	No hay transporte	No hay transporte	No hay transporte	No hay transporte	Sin hablantes de lengua indígena	Sin hablantes de lengua indígena	Sin hablantes de lengua indígena	Sin hablantes de lengua indígena	Sin hablantes de lengua indígena	Sin hablantes de lengua indígena	Sin hablantes de lengua indígena	Agricultura	Agricultura	NE	NO	NO	NO	NO	NO	Falta de otros servicios o equipamiento	NA	NA	NA	NA	NA	NA	NA	NA	NA	NA	NA	NA	NA	NA	NA	NA	NA	NA	NA
12	Guerrero	001	Acapulco de Juárez	0691	El Rincón	0994041	170544	0671	Terracería	Conexa a carretera	No hay transporte	No hay transporte	No hay transporte	No hay transporte	Sin hablantes de lengua indígena	Sin hablantes de lengua indígena	Sin hablantes de lengua indígena	Sin hablantes de lengua indígena	Sin hablantes de lengua indígena	Sin hablantes de lengua indígena	Sin hablantes de lengua indígena	Agricultura	NE	NE	NO	NO	NO	SI	NO	Falta de energía eléctrica	NA	NA	NA	NA	NA	NA	NA	NA	NA	NA	NA	NA	NA	NA	NA	NA	NA	NA	NA
12	Guerrero	001	Acapulco de Juárez	0693	El Zapote	0994046	170519	0674	Terracería	Conexa a carretera	No hay transporte	No hay transporte	No hay transporte	No hay transporte	Sin hablantes de lengua indígena	Sin hablantes de lengua indígena	Sin hablantes de lengua indígena	Sin hablantes de lengua indígena	Sin hablantes de lengua indígena	Sin hablantes de lengua indígena	Sin hablantes de lengua indígena	Agricultura	NE	NE	NO	NO	NO	NO	NO	Delincuencia o inseguridad	NA	NA	NA	NA	NA	NA	NA	NA	NA	NA	NA	NA	NA	NA	NA	NA	NA	NA	NA
12	Guerrero	001	Acapulco de Juárez	0694	Rancho el Tamarindillo	0993426	164748	0060	No conexa a carretera	De 1 a 3 km	No hay transporte	No hay transporte	No hay transporte	No hay transporte	Sin hablantes de lengua indígena	Sin hablantes de lengua indígena	Sin hablantes de lengua indígena	Sin hablantes de lengua indígena	Sin hablantes de lengua indígena	Sin hablantes de lengua indígena	Sin hablantes de lengua indígena	Insuficientemente especificado del sector construcción	NE	NE	NO	NO	NO	NO	NO	Falta de energía eléctrica	NA	NA	NA	NA	NA	NA	NA	NA	NA	NA	NA	NA	NA	NA	NA	NA	NA	NA	NA
12	Guerrero	001	Acapulco de Juárez	0695	El Progreso de Cacahuatepec	0993241	164820	0120	Terracería	Conexa a carretera	Micro, combi o camioneta	Tiempo de traslado NE	Frecuencia NE	De 75 a 99 pesos	Sin hablantes de lengua indígena	Sin hablantes de lengua indígena	Sin hablantes de lengua indígena	Sin hablantes de lengua indígena	Sin hablantes de lengua indígena	Sin hablantes de lengua indígena	Sin hablantes de lengua indígena	Insuficientemente especificado del sector construcción	Agricultura	NE	SI	NO	NO	NO	NO	Falta de infraestructura o servicio de agua	NO	Red de agua no disponible	NO	Red de drenaje no disponible	SI	NO	Destino NE	SI	NO	NO	NO	SI	SI	NO	NO	NO	NO	NO	SI
12	Guerrero	001	Acapulco de Juárez	0696	Colonia Nueva de San Rafael	0993659	164229	0009	No conexa a carretera	Distancia NE	No hay transporte	No hay transporte	No hay transporte	No hay transporte	Sin hablantes de lengua indígena	Sin hablantes de lengua indígena	Sin hablantes de lengua indígena	Sin hablantes de lengua indígena	Sin hablantes de lengua indígena	Sin hablantes de lengua indígena	Sin hablantes de lengua indígena	Insuficientemente especificado del sector comercio al por menor	NE	NE	NO	NO	NO	NO	NO	Falta de infraestructura o servicio de agua	NA	NA	NA	NA	NA	NA	NA	NA	NA	NA	NA	NA	NA	NA	NA	NA	NA	NA	NA
12	Guerrero	001	Acapulco de Juárez	0697	Colonia Democrática	0994845	165327	0019	Terracería	Conexa a carretera	Micro, combi o camioneta	De 30 a 60 min	De 31 a 60 salidas al día	De 3 a 6 pesos	Con hablantes de lengua indígena	Náhuatl	SI	NO	NO	SI	NO	Agricultura	Trabajos de albañilería de instalaciones hidrosanitarias y eléctricas y de trabajos en exteriores	Cría y explotación de animales	NO	NO	NO	SI	SI	Falta de otros servicios o equipamiento	NO	Red de agua no disponible	NO	Red de drenaje no disponible	SI	NE	Queman la basura	SI	NO	NO	NO	NO	NO	NO	NO	NO	NO	NO	NO
12	Guerrero	001	Acapulco de Juárez	0699	Lucio Cabañas [Campamento Popular]	0994812	165545	0059	Terracería	Conexa a carretera	No hay transporte	No hay transporte	No hay transporte	No hay transporte	Con hablantes de lengua indígena	Mixteco	SI	NO	NO	NO	NO	Insuficientemente especificado del sector construcción	NE	NE	NO	NO	NO	NO	NO	Falta de carretera o transporte	NO	Red de agua no disponible	NO	Red de drenaje no disponible	NO	NO	No hay recolección	NO	NO	SI	NO	NO	NO	NO	NO	NO	NO	NO	SI
12	Guerrero	001	Acapulco de Juárez	0700	Colonia San Isidro del Progreso	0994232	164856	0019	Pavimentada	Conexa a carretera	No hay transporte	No hay transporte	No hay transporte	No hay transporte	Sin hablantes de lengua indígena	Sin hablantes de lengua indígena	Sin hablantes de lengua indígena	Sin hablantes de lengua indígena	Sin hablantes de lengua indígena	Sin hablantes de lengua indígena	Sin hablantes de lengua indígena	Insuficientemente especificado del sector construcción	Agricultura	Agricultura	NO	NO	SI	NO	NO	Falta de energía eléctrica	NA	NA	NA	NA	NA	NA	NA	NA	NA	NA	NA	NA	NA	NA	NA	NA	NA	NA	NA
12	Guerrero	001	Acapulco de Juárez	0705	Convento Monte San Alfonso	0995641	165442	0128	Terracería	Conexa a carretera	No hay transporte	No hay transporte	No hay transporte	No hay transporte	Con hablantes de lengua indígena	Quiché (K´iche´)	NE	NE	NE	NE	NE	Insuficientemente especificado del sector construcción	NE	NE	NO	NO	NO	NO	NO	Falta de infraestructura o servicio de agua	NA	NA	NA	NA	NA	NA	NA	NA	NA	NA	NA	NA	NA	NA	NA	NA	NA	NA	NA
12	Guerrero	001	Acapulco de Juárez	0706	Fraccionamiento Campestre de la Laguna	0994701	164746	0002	Pavimentada	Conexa a carretera	No hay transporte	No hay transporte	No hay transporte	No hay transporte	Sin hablantes de lengua indígena	Sin hablantes de lengua indígena	Sin hablantes de lengua indígena	Sin hablantes de lengua indígena	Sin hablantes de lengua indígena	Sin hablantes de lengua indígena	Sin hablantes de lengua indígena	Insuficientemente especificado del sector servicios educativos	NE	NE	NO	NO	NO	NO	NO	Falta de infraestructura o servicio de agua	NE	Disponibilidad de red de agua NE	NE	Disponibilidad NE	NE	NE	Recolección y limpieza NE	NE	NE	NE	NE	NE	NE	NE	NE	NE	NE	NE	NE
12	Guerrero	001	Acapulco de Juárez	0707	Residencial Paraiso Diamante	0994439	164933	0001	Pavimentada	Conexa a carretera	No hay transporte	No hay transporte	No hay transporte	No hay transporte	Sin hablantes de lengua indígena	Sin hablantes de lengua indígena	Sin hablantes de lengua indígena	Sin hablantes de lengua indígena	Sin hablantes de lengua indígena	Sin hablantes de lengua indígena	Sin hablantes de lengua indígena	NE	NE	NE	NO	NO	NO	NO	NO	Sin problema	NE	Disponibilidad de red de agua NE	NE	Disponibilidad NE	NE	NE	Recolección y limpieza NE	NE	NE	NE	NE	NE	NE	NE	NE	NE	NE	NE	NE
12	Guerrero	001	Acapulco de Juárez	0710	San José	0994241	170502	0589	Terracería	Conexa a carretera	No hay transporte	No hay transporte	No hay transporte	No hay transporte	Con hablantes de lengua indígena	Náhuatl	SI	NO	NO	NO	NO	Agricultura	NE	NE	NO	NO	NO	NO	SI	Falta de infraestructura o servicio de agua	NE	Disponibilidad de red de agua NE	NE	Disponibilidad NE	NE	NE	Recolección y limpieza NE	NE	NE	NE	NE	NE	NE	NE	NE	NE	NE	NE	NE
12	Guerrero	001	Acapulco de Juárez	0711	Los Atascaderos	0994716	170714	0767	Terracería	Conexa a carretera	No hay transporte	No hay transporte	No hay transporte	No hay transporte	Sin hablantes de lengua indígena	Sin hablantes de lengua indígena	Sin hablantes de lengua indígena	Sin hablantes de lengua indígena	Sin hablantes de lengua indígena	Sin hablantes de lengua indígena	Sin hablantes de lengua indígena	Agricultura	Cría y explotación de animales	NE	NO	NO	NO	NO	NO	Pobreza o marginación	NA	NA	NA	NA	NA	NA	NA	NA	NA	NA	NA	NA	NA	NA	NA	NA	NA	NA	NA
12	Guerrero	001	Acapulco de Juárez	0712	Paseo de la Laguna	0994806	165343	0037	Terracería	Conexa a carretera	Micro, combi o camioneta	De 30 a 60 min	De 31 a 60 salidas al día	De 10 a 14 pesos	Sin hablantes de lengua indígena	Sin hablantes de lengua indígena	Sin hablantes de lengua indígena	Sin hablantes de lengua indígena	Sin hablantes de lengua indígena	Sin hablantes de lengua indígena	Sin hablantes de lengua indígena	Agricultura	Trabajos de albañilería de instalaciones hidrosanitarias y eléctricas y de trabajos en exteriores	NE	NO	NO	NO	NO	NO	Falta de otros servicios o equipamiento	NA	NA	NA	NA	NA	NA	NA	NA	NA	NA	NA	NA	NA	NA	NA	NA	NA	NA	NA
12	Guerrero	001	Acapulco de Juárez	0713	Colonia Manuel Añorve Baños	0994741	165313	0028	Terracería	Conexa a carretera	No hay transporte	No hay transporte	No hay transporte	No hay transporte	Sin hablantes de lengua indígena	Sin hablantes de lengua indígena	Sin hablantes de lengua indígena	Sin hablantes de lengua indígena	Sin hablantes de lengua indígena	Sin hablantes de lengua indígena	Sin hablantes de lengua indígena	Agricultura	NE	NE	NO	NO	NO	NO	NO	Pobreza o marginación	NA	NA	NA	NA	NA	NA	NA	NA	NA	NA	NA	NA	NA	NA	NA	NA	NA	NA	NA
12	Guerrero	001	Acapulco de Juárez	0714	Colonia la Gloria	0994812	165358	0037	Terracería	Conexa a carretera	Micro, combi o camioneta	De 30 a 60 min	De 6 a 10 salidas al día	De 3 a 6 pesos	Sin hablantes de lengua indígena	Sin hablantes de lengua indígena	Sin hablantes de lengua indígena	Sin hablantes de lengua indígena	Sin hablantes de lengua indígena	Sin hablantes de lengua indígena	Sin hablantes de lengua indígena	Agricultura	NE	NE	NO	SI	SI	SI	SI	Falta de otros servicios o equipamiento	NO	Red de agua no disponible	NO	Red de drenaje no disponible	NO	NO	No hay recolección	SI	NO	SI	NO	NO	NO	NO	NO	NO	NO	NO	SI
12	Guerrero	001	Acapulco de Juárez	0719	Joyas de San Agustín	0995040	165534	0078	NDAI	NDAI	NDAI	NDAI	NDAI	NDAI	NDAI	NDAI	NDAI	NDAI	NDAI	NDAI	NDAI	NDAI	NDAI	NDAI	NDAI	NDAI	NDAI	NDAI	NDAI	No especificado	NA	NA	NA	NA	NA	NA	NA	NA	NA	NA	NA	NA	NA	NA	NA	NA	NA	NA	NA
12	Guerrero	001	Acapulco de Juárez	0724	Lomas del Pedregal	0994818	165917	0199	NDAI	NDAI	NDAI	NDAI	NDAI	NDAI	NDAI	NDAI	NDAI	NDAI	NDAI	NDAI	NDAI	NDAI	NDAI	NDAI	NDAI	NDAI	NDAI	NDAI	NDAI	No especificado	NA	NA	NA	NA	NA	NA	NA	NA	NA	NA	NA	NA	NA	NA	NA	NA	NA	NA	NA
12	Guerrero	001	Acapulco de Juárez	0725	La Huerta	0994718	165231	0017	Pavimentada	Conexa a carretera	Micro, combi o camioneta	DE 15 A 19 MIN	De 21 a 30 salidas al día	De 20 a 24 pesos	Sin hablantes de lengua indígena	Sin hablantes de lengua indígena	Sin hablantes de lengua indígena	Sin hablantes de lengua indígena	Sin hablantes de lengua indígena	Sin hablantes de lengua indígena	Sin hablantes de lengua indígena	Agricultura	NE	NE	NO	NO	NO	NO	NO	Falta de apoyo o deficiencia gubernamental	NA	NA	NA	NA	NA	NA	NA	NA	NA	NA	NA	NA	NA	NA	NA	NA	NA	NA	NA
12	Guerrero	001	Acapulco de Juárez	0726	Huerta la Bugambilia	0994718	165228	0017	NE	Conexión a carretera NE	Disponibilidad de transporte NE	Disponibilidad de transporte NE	Disponibilidad de transporte NE	Disponibilidad de transporte NE	NE	Hablantes de lengua indígena NE	Hablantes de lengua indígena NE	Hablantes de lengua indígena NE	Hablantes de lengua indígena NE	Hablantes de lengua indígena NE	Hablantes de lengua indígena NE	NE	NE	NE	NE	NE	NE	NE	NE	No especificado	NA	NA	NA	NA	NA	NA	NA	NA	NA	NA	NA	NA	NA	NA	NA	NA	NA	NA	NA
12	Guerrero	001	Acapulco de Juárez	0727	Huerta David Jiménez	0994728	165221	0017	NDAI	NDAI	NDAI	NDAI	NDAI	NDAI	NDAI	NDAI	NDAI	NDAI	NDAI	NDAI	NDAI	NDAI	NDAI	NDAI	NDAI	NDAI	NDAI	NDAI	NDAI	No especificado	NA	NA	NA	NA	NA	NA	NA	NA	NA	NA	NA	NA	NA	NA	NA	NA	NA	NA	NA
12	Guerrero	001	Acapulco de Juárez	0729	Huerta Medardo Olea Gerardo	0994720	165215	0018	Pavimentada	Conexa a carretera	Micro, combi o camioneta	De 3 a 9 min	Frecuencia NE	De 10 a 14 pesos	Sin hablantes de lengua indígena	Sin hablantes de lengua indígena	Sin hablantes de lengua indígena	Sin hablantes de lengua indígena	Sin hablantes de lengua indígena	Sin hablantes de lengua indígena	Sin hablantes de lengua indígena	Servicios de alojamiento temporal	NE	NE	NO	NO	NO	NO	NO	Otra clase de problema	NA	NA	NA	NA	NA	NA	NA	NA	NA	NA	NA	NA	NA	NA	NA	NA	NA	NA	NA
12	Guerrero	001	Acapulco de Juárez	0730	Mirita de los Reyes	0994822	165247	0017	NDAI	NDAI	NDAI	NDAI	NDAI	NDAI	NDAI	NDAI	NDAI	NDAI	NDAI	NDAI	NDAI	NDAI	NDAI	NDAI	NDAI	NDAI	NDAI	NDAI	NDAI	No especificado	NA	NA	NA	NA	NA	NA	NA	NA	NA	NA	NA	NA	NA	NA	NA	NA	NA	NA	NA
12	Guerrero	001	Acapulco de Juárez	0732	Gaspar Sequeida	0994838	165308	0018	Pavimentada	Conexa a carretera	Micro, combi o camioneta	DE 15 A 19 MIN	De 21 a 30 salidas al día	De 20 a 24 pesos	Sin hablantes de lengua indígena	Sin hablantes de lengua indígena	Sin hablantes de lengua indígena	Sin hablantes de lengua indígena	Sin hablantes de lengua indígena	Sin hablantes de lengua indígena	Sin hablantes de lengua indígena	Agricultura	Cría y explotación de animales	NE	NO	NO	NO	NO	SI	Falta de empleo o emigración	NA	NA	NA	NA	NA	NA	NA	NA	NA	NA	NA	NA	NA	NA	NA	NA	NA	NA	NA
12	Guerrero	001	Acapulco de Juárez	0733	Huerta Ubaldo Muñoz	0994831	165251	0017	NE	Conexión a carretera NE	Disponibilidad de transporte NE	Disponibilidad de transporte NE	Disponibilidad de transporte NE	Disponibilidad de transporte NE	NE	Hablantes de lengua indígena NE	Hablantes de lengua indígena NE	Hablantes de lengua indígena NE	Hablantes de lengua indígena NE	Hablantes de lengua indígena NE	Hablantes de lengua indígena NE	NE	NE	NE	NE	NE	NE	NE	NE	No especificado	NA	NA	NA	NA	NA	NA	NA	NA	NA	NA	NA	NA	NA	NA	NA	NA	NA	NA	NA
12	Guerrero	001	Acapulco de Juárez	0735	Colonia Santa Lucía	0994825	165213	0017	Pavimentada	Conexa a carretera	Micro, combi o camioneta	De 20 a 24 min	De 21 a 30 salidas al día	De 20 a 24 pesos	Sin hablantes de lengua indígena	Sin hablantes de lengua indígena	Sin hablantes de lengua indígena	Sin hablantes de lengua indígena	Sin hablantes de lengua indígena	Sin hablantes de lengua indígena	Sin hablantes de lengua indígena	Cría y explotación de animales	Agricultura	NE	NO	NO	NO	SI	NO	Delincuencia o inseguridad	NA	NA	NA	NA	NA	NA	NA	NA	NA	NA	NA	NA	NA	NA	NA	NA	NA	NA	NA
12	Guerrero	001	Acapulco de Juárez	0736	Rancho Viejo	0994753	165237	0017	NDAI	NDAI	NDAI	NDAI	NDAI	NDAI	NDAI	NDAI	NDAI	NDAI	NDAI	NDAI	NDAI	NDAI	NDAI	NDAI	NDAI	NDAI	NDAI	NDAI	NDAI	No especificado	NA	NA	NA	NA	NA	NA	NA	NA	NA	NA	NA	NA	NA	NA	NA	NA	NA	NA	NA
12	Guerrero	001	Acapulco de Juárez	0737	Colonia Tabiquera	0994823	165257	0017	NDAI	NDAI	NDAI	NDAI	NDAI	NDAI	NDAI	NDAI	NDAI	NDAI	NDAI	NDAI	NDAI	NDAI	NDAI	NDAI	NDAI	NDAI	NDAI	NDAI	NDAI	No especificado	NA	NA	NA	NA	NA	NA	NA	NA	NA	NA	NA	NA	NA	NA	NA	NA	NA	NA	NA
12	Guerrero	001	Acapulco de Juárez	0738	Huerta Patricia Sánchez Rivera	0994808	165241	0017	NDAI	NDAI	NDAI	NDAI	NDAI	NDAI	NDAI	NDAI	NDAI	NDAI	NDAI	NDAI	NDAI	NDAI	NDAI	NDAI	NDAI	NDAI	NDAI	NDAI	NDAI	No especificado	NA	NA	NA	NA	NA	NA	NA	NA	NA	NA	NA	NA	NA	NA	NA	NA	NA	NA	NA
12	Guerrero	001	Acapulco de Juárez	0739	Huerta el Naranjal	0994736	165440	0039	NDAI	NDAI	NDAI	NDAI	NDAI	NDAI	NDAI	NDAI	NDAI	NDAI	NDAI	NDAI	NDAI	NDAI	NDAI	NDAI	NDAI	NDAI	NDAI	NDAI	NDAI	No especificado	NA	NA	NA	NA	NA	NA	NA	NA	NA	NA	NA	NA	NA	NA	NA	NA	NA	NA	NA
12	Guerrero	001	Acapulco de Juárez	0740	Acapulco 2000	0994837	165217	0017	NDAI	NDAI	NDAI	NDAI	NDAI	NDAI	NDAI	NDAI	NDAI	NDAI	NDAI	NDAI	NDAI	NDAI	NDAI	NDAI	NDAI	NDAI	NDAI	NDAI	NDAI	No especificado	NA	NA	NA	NA	NA	NA	NA	NA	NA	NA	NA	NA	NA	NA	NA	NA	NA	NA	NA
12	Guerrero	002	Ahuacuotzingo	0001	Ahuacuotzingo	0985600	174249	1468	Pavimentada	Conexa a carretera	Es cabecera	Es cabecera	Es cabecera	Es cabecera	Sin hablantes de lengua indígena	Sin hablantes de lengua indígena	Sin hablantes de lengua indígena	Sin hablantes de lengua indígena	Sin hablantes de lengua indígena	Sin hablantes de lengua indígena	Sin hablantes de lengua indígena	Agricultura	NE	NE	SI	SI	SI	NO	SI	Falta de empleo o emigración	SI	Disponible sin cobro	SI	Disponible con desalojo a un cuerpo de agua	NO	SI	Queman la basura	SI	SI	NO	SI	SI	SI	SI	SI	SI	NO	NO	SI
12	Guerrero	002	Ahuacuotzingo	0002	Acateyahualco	0990134	174604	1236	Terracería	Conexa a carretera	No hay transporte	No hay transporte	No hay transporte	No hay transporte	Sin hablantes de lengua indígena	Sin hablantes de lengua indígena	Sin hablantes de lengua indígena	Sin hablantes de lengua indígena	Sin hablantes de lengua indígena	Sin hablantes de lengua indígena	Sin hablantes de lengua indígena	Agricultura	Cría y explotación de animales	NE	NO	NO	NO	NO	NO	No especificado	NE	Disponibilidad de red de agua NE	NE	Disponibilidad NE	NE	NE	Recolección y limpieza NE	NE	NE	NE	NE	NE	NE	NE	NE	NE	NE	NE	NE
12	Guerrero	002	Ahuacuotzingo	0003	Agua Zarca	0990013	174341	1079	Pavimentada	Conexa a carretera	Micro, combi o camioneta	De 25 a 29 min	De 31 a 60 salidas al día	De 15 a 19 pesos	Con hablantes de lengua indígena	Náhuatl	SI	SI	SI	SI	SI	Agricultura	Fabricación de productos textiles, excepto prendas de vestir	Trabajos de albañilería de instalaciones hidrosanitarias y eléctricas y de trabajos en exteriores	SI	SI	SI	NO	SI	Irregularidad o disputa relacionada con la tenencia de la tierra	SI	Disponible sin cobro	NO	Red de drenaje no disponible	NO	NO	No hay recolección	SI	NO	NO	NO	SI	SI	NO	NO	SI	NO	NO	SI
12	Guerrero	002	Ahuacuotzingo	0004	Ajuatetla	0990428	174654	1345	Terracería	Conexa a carretera	No hay transporte	No hay transporte	No hay transporte	No hay transporte	Sin hablantes de lengua indígena	Sin hablantes de lengua indígena	Sin hablantes de lengua indígena	Sin hablantes de lengua indígena	Sin hablantes de lengua indígena	Sin hablantes de lengua indígena	Sin hablantes de lengua indígena	Agricultura	Cría y explotación de animales	Agricultura	SI	NO	NO	NO	NO	Falta de empleo o emigración	SI	Disponible sin cobro	SI	Disponible con desalojo a otro lugar	NO	NO	No hay recolección	SI	NO	NO	NO	SI	NO	NO	NO	NO	NO	NO	SI
12	Guerrero	002	Ahuacuotzingo	0005	Alpuyecancingo de las Montañas	0985107	174015	1465	Terracería	Conexa a carretera	Micro, combi o camioneta	De 30 a 60 min	De 1 a 5 salidas al día	De 60 a 74 pesos	Con hablantes de lengua indígena	Náhuatl	SI	SI	SI	SI	SI	Agricultura	Fabricación de prendas de vestir	NE	NO	NO	NO	NO	NO	Falta de infraestructura o servicio de agua	SI	Disponible sin cobro	NO	Red de drenaje no disponible	NO	NO	No hay recolección	SI	NO	SI	NO	SI	NO	SI	NO	SI	NO	NO	SI
12	Guerrero	002	Ahuacuotzingo	0006	Chachayaco	0985512	174517	0943	Terracería	Conexa a carretera	No hay transporte	No hay transporte	No hay transporte	No hay transporte	Sin hablantes de lengua indígena	Sin hablantes de lengua indígena	Sin hablantes de lengua indígena	Sin hablantes de lengua indígena	Sin hablantes de lengua indígena	Sin hablantes de lengua indígena	Sin hablantes de lengua indígena	Agricultura	Cría y explotación de animales	NE	NO	NO	NO	NO	NO	Sin problema	NA	NA	NA	NA	NA	NA	NA	NA	NA	NA	NA	NA	NA	NA	NA	NA	NA	NA	NA
12	Guerrero	002	Ahuacuotzingo	0008	Lagunillas	0985523	174746	1150	Terracería	Conexa a carretera	Camión de redilas o troca	Más de 1 y hasta 1.5 horas	De 1 a 5 salidas al día	De 75 a 99 pesos	Sin hablantes de lengua indígena	Sin hablantes de lengua indígena	Sin hablantes de lengua indígena	Sin hablantes de lengua indígena	Sin hablantes de lengua indígena	Sin hablantes de lengua indígena	Sin hablantes de lengua indígena	Agricultura	NE	NE	NO	SI	NO	NO	NO	Falta de infraestructura o servicio de agua	NE	Disponibilidad de red de agua NE	NE	Disponibilidad NE	NE	NE	Recolección y limpieza NE	NE	NE	NE	NE	NE	NE	NE	NE	NE	NE	NE	NE
12	Guerrero	002	Ahuacuotzingo	0009	Mazapa	0990204	174552	1350	Terracería	Conexa a carretera	No hay transporte	No hay transporte	No hay transporte	No hay transporte	Sin hablantes de lengua indígena	Sin hablantes de lengua indígena	Sin hablantes de lengua indígena	Sin hablantes de lengua indígena	Sin hablantes de lengua indígena	Sin hablantes de lengua indígena	Sin hablantes de lengua indígena	Agricultura	Cría y explotación de animales	NE	NO	NO	NO	NO	SI	No especificado	NA	NA	NA	NA	NA	NA	NA	NA	NA	NA	NA	NA	NA	NA	NA	NA	NA	NA	NA
12	Guerrero	002	Ahuacuotzingo	0010	Mitlancingo	0985853	174950	0684	Terracería	Conexa a carretera	No hay transporte	No hay transporte	No hay transporte	No hay transporte	Sin hablantes de lengua indígena	Sin hablantes de lengua indígena	Sin hablantes de lengua indígena	Sin hablantes de lengua indígena	Sin hablantes de lengua indígena	Sin hablantes de lengua indígena	Sin hablantes de lengua indígena	Agricultura	NE	NE	NO	NO	NO	NO	NO	Sin problema	NE	Disponibilidad de red de agua NE	NO	Red de drenaje no disponible	NO	NO	No hay recolección	SI	SI	NO	NO	SI	SI	SI	NO	SI	NO	NO	SI
12	Guerrero	002	Ahuacuotzingo	0011	Oxtotitlán	0990136	174025	1259	Terracería	Conexa a carretera	No hay transporte	No hay transporte	No hay transporte	No hay transporte	Con hablantes de lengua indígena	Náhuatl	SI	NO	NO	NO	NO	Agricultura	Fabricación de insumos textiles y acabado de textiles	Cría y explotación de animales	NO	SI	NO	NO	NO	Otra clase de problema	NO	Red de agua no disponible	NO	Red de drenaje no disponible	NO	NO	No hay recolección	SI	NO	NO	NO	SI	NO	NO	NO	SI	NO	NO	SI
12	Guerrero	002	Ahuacuotzingo	0012	Ostoyahualco	0985804	174254	1298	Pavimentada	Conexa a carretera	Micro, combi o camioneta	De 10 a 14 min	De 31 a 60 salidas al día	De 7 a 9 pesos	Sin hablantes de lengua indígena	Sin hablantes de lengua indígena	Sin hablantes de lengua indígena	Sin hablantes de lengua indígena	Sin hablantes de lengua indígena	Sin hablantes de lengua indígena	Sin hablantes de lengua indígena	Agricultura	Fabricación de insumos textiles y acabado de textiles	NE	SI	NO	NO	NO	NO	Sin problema	SI	Disponible sin cobro	NO	Red de drenaje no disponible	NO	NO	No hay recolección	SI	NO	NO	NO	SI	SI	NO	NO	SI	NO	NO	SI
12	Guerrero	002	Ahuacuotzingo	0013	Pochutla	0985351	173938	1151	Pavimentada	Conexa a carretera	Micro, combi o camioneta	De 20 a 24 min	De 1 a 5 salidas al día	De 30 a 34 pesos	Sin hablantes de lengua indígena	Sin hablantes de lengua indígena	Sin hablantes de lengua indígena	Sin hablantes de lengua indígena	Sin hablantes de lengua indígena	Sin hablantes de lengua indígena	Sin hablantes de lengua indígena	Agricultura	NE	NE	NO	SI	NO	NO	NO	Otra clase de problema	SI	Disponible con cobro	NO	Red de drenaje no disponible	NO	NO	No hay recolección	SI	SI	SI	SI	SI	SI	SI	SI	SI	NO	SI	SI
12	Guerrero	002	Ahuacuotzingo	0014	Rincón de Cozahuapa	0985658	174942	0920	Terracería	Conexa a carretera	Camión de redilas o troca	Más de 1.5 y hasta 2 horas	De 1 a 5 salidas al día	De 75 a 99 pesos	Sin hablantes de lengua indígena	Sin hablantes de lengua indígena	Sin hablantes de lengua indígena	Sin hablantes de lengua indígena	Sin hablantes de lengua indígena	Sin hablantes de lengua indígena	Sin hablantes de lengua indígena	Agricultura	NE	NE	NO	SI	NO	NO	SI	Alcoholismo o drogadicción	NO	Red de agua no disponible	NO	Red de drenaje no disponible	NO	NO	No hay recolección	SI	NO	SI	NO	SI	SI	NO	SI	SI	NO	NO	SI
12	Guerrero	002	Ahuacuotzingo	0015	Rincón Peñitas	0985653	174350	1193	Terracería	Conexa a carretera	Micro, combi o camioneta	DE 15 A 19 MIN	De 1 a 5 salidas al día	De 15 a 19 pesos	Sin hablantes de lengua indígena	Sin hablantes de lengua indígena	Sin hablantes de lengua indígena	Sin hablantes de lengua indígena	Sin hablantes de lengua indígena	Sin hablantes de lengua indígena	Sin hablantes de lengua indígena	Agricultura	Trabajos de albañilería de instalaciones hidrosanitarias y eléctricas y de trabajos en exteriores	NE	SI	NO	NO	NO	NO	Irregularidad o disputa relacionada con la tenencia de la tierra	SI	Disponible sin cobro	NO	Red de drenaje no disponible	NO	NO	No hay recolección	SI	NO	NO	NO	NO	SI	NO	NO	SI	NO	NO	NO
12	Guerrero	002	Ahuacuotzingo	0016	San Juan (Las Joyas)	0990402	174915	1165	Terracería	Conexa a carretera	No hay transporte	No hay transporte	No hay transporte	No hay transporte	Sin hablantes de lengua indígena	Sin hablantes de lengua indígena	Sin hablantes de lengua indígena	Sin hablantes de lengua indígena	Sin hablantes de lengua indígena	Sin hablantes de lengua indígena	Sin hablantes de lengua indígena	Agricultura	NE	NE	SI	SI	SI	SI	SI	Alcoholismo o drogadicción	SI	Disponible con cobro	NO	Red de drenaje no disponible	SI	NO	Destino NE	SI	SI	SI	SI	SI	SI	SI	NO	SI	NO	NO	SI
12	Guerrero	002	Ahuacuotzingo	0017	San Miguel Ahuelican	0985309	173736	1578	Terracería	Conexa a carretera	No hay transporte	No hay transporte	No hay transporte	No hay transporte	Con hablantes de lengua indígena	Náhuatl	SI	SI	NO	NO	SI	Agricultura	NE	NE	NO	SI	SI	NO	NO	Pobreza o marginación	NA	NA	NA	NA	NA	NA	NA	NA	NA	NA	NA	NA	NA	NA	NA	NA	NA	NA	NA
12	Guerrero	002	Ahuacuotzingo	0018	Santa Catarina (Santa Catarina las Joyas)	0990528	174500	1401	Terracería	Conexa a carretera	No hay transporte	No hay transporte	No hay transporte	No hay transporte	Con hablantes de lengua indígena	Náhuatl	SI	SI	NO	SI	SI	Agricultura	Cría y explotación de animales	Agricultura	SI	NO	NO	NO	NO	Falta de empleo o emigración	SI	Disponible sin cobro	NO	Red de drenaje no disponible	NO	NO	No hay recolección	SI	NO	NO	NO	SI	NO	NO	NO	NO	NO	NO	NO
12	Guerrero	002	Ahuacuotzingo	0019	Tecaxitla	0985057	174718	1566	No conexa a carretera	De 31 a 40 km	No hay transporte	No hay transporte	No hay transporte	No hay transporte	Sin hablantes de lengua indígena	Sin hablantes de lengua indígena	Sin hablantes de lengua indígena	Sin hablantes de lengua indígena	Sin hablantes de lengua indígena	Sin hablantes de lengua indígena	Sin hablantes de lengua indígena	Agricultura	Edificación residencial	Cría y explotación de animales	NO	NO	NO	NO	NO	Sin problema	NA	NA	NA	NA	NA	NA	NA	NA	NA	NA	NA	NA	NA	NA	NA	NA	NA	NA	NA
12	Guerrero	002	Ahuacuotzingo	0020	Tecoanapa	0990235	174030	1114	Terracería	Conexa a carretera	No hay transporte	No hay transporte	No hay transporte	No hay transporte	Sin hablantes de lengua indígena	Sin hablantes de lengua indígena	Sin hablantes de lengua indígena	Sin hablantes de lengua indígena	Sin hablantes de lengua indígena	Sin hablantes de lengua indígena	Sin hablantes de lengua indígena	Agricultura	Fabricación de productos textiles, excepto prendas de vestir	Industria de las bebidas y del tabaco	NO	NO	SI	NO	NO	No especificado	NO	Red de agua no disponible	NO	Red de drenaje no disponible	NO	NO	No hay recolección	SI	SI	NO	NO	SI	NO	SI	NO	NO	NO	NO	SI
12	Guerrero	002	Ahuacuotzingo	0021	Tecolcuautla	0985657	174710	1037	Terracería	Conexa a carretera	Camión de redilas o troca	De 30 a 60 min	De 1 a 5 salidas al día	De 30 a 34 pesos	Con hablantes de lengua indígena	Náhuatl	NO	NO	NO	SI	NO	Agricultura	NE	NE	SI	SI	SI	NO	SI	Alcoholismo o drogadicción	SI	Disponible sin cobro	NO	Red de drenaje no disponible	NO	NO	No hay recolección	SI	NO	NO	NO	SI	SI	SI	SI	SI	NO	NO	SI
12	Guerrero	002	Ahuacuotzingo	0022	Tecozajca (Tepehuaje)	0985212	174856	1208	Terracería	Conexa a carretera	Camión de redilas o troca	Más de 2 y hasta 3 horas	De 1 a 5 salidas al día	De 100 a 119 pesos	Con hablantes de lengua indígena	Náhuatl	SI	SI	NO	SI	SI	Agricultura	NE	NE	NO	SI	SI	NO	SI	Alcoholismo o drogadicción	NO	Red de agua no disponible	NO	Red de drenaje no disponible	NO	NO	No hay recolección	SI	SI	SI	NO	SI	SI	NO	SI	SI	NO	NO	SI
12	Guerrero	002	Ahuacuotzingo	0023	Tenanzintitlán (La Hacienda)	0985944	174551	0903	Terracería	Conexa a carretera	No hay transporte	No hay transporte	No hay transporte	No hay transporte	Sin hablantes de lengua indígena	Sin hablantes de lengua indígena	Sin hablantes de lengua indígena	Sin hablantes de lengua indígena	Sin hablantes de lengua indígena	Sin hablantes de lengua indígena	Sin hablantes de lengua indígena	Agricultura	Cría y explotación de animales	NE	NO	NO	NO	NO	NO	Sin problema	NE	Disponibilidad de red de agua NE	NE	Disponibilidad NE	NE	NE	Recolección y limpieza NE	NE	NE	NE	NE	NE	NE	NE	NE	NE	NE	NE	NE
12	Guerrero	002	Ahuacuotzingo	0024	Tepetlatipa	0990129	174823	1418	Terracería	Conexa a carretera	No hay transporte	No hay transporte	No hay transporte	No hay transporte	Sin hablantes de lengua indígena	Sin hablantes de lengua indígena	Sin hablantes de lengua indígena	Sin hablantes de lengua indígena	Sin hablantes de lengua indígena	Sin hablantes de lengua indígena	Sin hablantes de lengua indígena	Agricultura	NE	NE	SI	NO	SI	NO	SI	Alcoholismo o drogadicción	NO	Red de agua no disponible	NO	Red de drenaje no disponible	NO	NO	No hay recolección	SI	NO	SI	NO	SI	SI	NO	NO	SI	NO	NO	SI
12	Guerrero	002	Ahuacuotzingo	0025	Tepoxtlán	0985825	174602	0854	Terracería	Conexa a carretera	No hay transporte	No hay transporte	No hay transporte	No hay transporte	Sin hablantes de lengua indígena	Sin hablantes de lengua indígena	Sin hablantes de lengua indígena	Sin hablantes de lengua indígena	Sin hablantes de lengua indígena	Sin hablantes de lengua indígena	Sin hablantes de lengua indígena	Agricultura	Cría y explotación de animales	NE	NO	SI	NO	NO	NO	Otra clase de problema	SI	Disponible sin cobro	NO	Red de drenaje no disponible	NO	NO	No hay recolección	SI	NO	SI	NO	SI	NO	NO	NO	NO	NO	NO	NO
12	Guerrero	002	Ahuacuotzingo	0026	Tlalcomulco	0990227	174231	1235	Terracería	Conexa a carretera	No hay transporte	No hay transporte	No hay transporte	No hay transporte	Sin hablantes de lengua indígena	Sin hablantes de lengua indígena	Sin hablantes de lengua indígena	Sin hablantes de lengua indígena	Sin hablantes de lengua indígena	Sin hablantes de lengua indígena	Sin hablantes de lengua indígena	Agricultura	Fabricación de productos textiles, excepto prendas de vestir	Industria de las bebidas y del tabaco	NO	NO	SI	NO	NO	No especificado	SI	Disponible con cobro	NO	Red de drenaje no disponible	NO	NO	No hay recolección	SI	NO	SI	NO	SI	NO	NO	NO	SI	NO	NO	SI
12	Guerrero	002	Ahuacuotzingo	0027	Tlaquilcingo	0985512	175145	1122	Terracería	Conexa a carretera	Disponibilidad de transporte NE	Disponibilidad de transporte NE	Disponibilidad de transporte NE	Disponibilidad de transporte NE	Con hablantes de lengua indígena	Náhuatl	SI	NO	NO	NO	NO	Agricultura	NE	NE	NO	NO	NO	NO	NO	Sin problema	NE	Disponibilidad de red de agua NE	NE	Disponibilidad NE	NE	NE	Recolección y limpieza NE	NE	NE	NE	NE	NE	NE	NE	NE	NE	NE	NE	NE
12	Guerrero	002	Ahuacuotzingo	0028	Totolzintla	0990114	174617	1178	Terracería	Conexa a carretera	No hay transporte	No hay transporte	No hay transporte	No hay transporte	NE	Hablantes de lengua indígena NE	Hablantes de lengua indígena NE	Hablantes de lengua indígena NE	Hablantes de lengua indígena NE	Hablantes de lengua indígena NE	Hablantes de lengua indígena NE	Agricultura	Cría y explotación de animales	NE	NO	NO	NO	NO	NO	No especificado	NA	NA	NA	NA	NA	NA	NA	NA	NA	NA	NA	NA	NA	NA	NA	NA	NA	NA	NA
12	Guerrero	002	Ahuacuotzingo	0029	Trapiche Viejo	0990059	174303	1014	Pavimentada	Conexa a carretera	Micro, combi o camioneta	De 25 a 29 min	Más de 60 salidas	De 20 a 24 pesos	Sin hablantes de lengua indígena	Sin hablantes de lengua indígena	Sin hablantes de lengua indígena	Sin hablantes de lengua indígena	Sin hablantes de lengua indígena	Sin hablantes de lengua indígena	Sin hablantes de lengua indígena	Agricultura	Fabricación de productos textiles, excepto prendas de vestir	Industria de las bebidas y del tabaco	NO	SI	NO	NO	NO	Otra clase de problema	NO	Red de agua no disponible	NO	Red de drenaje no disponible	NO	NO	No hay recolección	NE	NO	NO	NO	SI	NO	NO	NO	SI	NO	NO	SI
12	Guerrero	002	Ahuacuotzingo	0030	Xitopontla	0985029	174244	1597	Terracería	Conexa a carretera	No hay transporte	No hay transporte	No hay transporte	No hay transporte	Con hablantes de lengua indígena	Náhuatl	SI	SI	SI	SI	SI	Agricultura	Fabricación de prendas de vestir	Cría y explotación de animales	SI	NO	NO	NO	NO	Irregularidad o disputa relacionada con la tenencia de la tierra	SI	Disponible sin cobro	NO	Red de drenaje no disponible	NO	NO	No hay recolección	SI	NO	SI	NO	SI	SI	NO	NO	SI	NO	NO	SI
12	Guerrero	002	Ahuacuotzingo	0031	Xocoyolzintla	0985855	174246	1320	Pavimentada	Conexa a carretera	Micro, combi o camioneta	DE 15 A 19 MIN	Más de 60 salidas	De 10 a 14 pesos	Sin hablantes de lengua indígena	Sin hablantes de lengua indígena	Sin hablantes de lengua indígena	Sin hablantes de lengua indígena	Sin hablantes de lengua indígena	Sin hablantes de lengua indígena	Sin hablantes de lengua indígena	Agricultura	Fabricación de productos textiles, excepto prendas de vestir	Industria de las bebidas y del tabaco	NO	NO	NO	NO	NO	Falta de empleo o emigración	SI	Disponible con cobro	SI	Disponible con desalojo a un cuerpo de agua	NO	NO	No hay recolección	SI	NO	NO	NO	SI	SI	NO	NO	SI	NO	NO	SI
12	Guerrero	002	Ahuacuotzingo	0033	Yupitepec	0985550	173957	1567	Terracería	Conexa a carretera	Micro, combi o camioneta	De 30 a 60 min	De 1 a 5 salidas al día	De 20 a 24 pesos	Sin hablantes de lengua indígena	Sin hablantes de lengua indígena	Sin hablantes de lengua indígena	Sin hablantes de lengua indígena	Sin hablantes de lengua indígena	Sin hablantes de lengua indígena	Sin hablantes de lengua indígena	Agricultura	NE	NE	SI	SI	SI	NO	NO	Otra clase de problema	NE	Disponibilidad de red de agua NE	NE	Disponibilidad NE	NE	NE	Recolección y limpieza NE	NE	NE	NE	NE	NE	NE	NE	NE	NE	NE	NE	NE
12	Guerrero	002	Ahuacuotzingo	0034	Zompazolco	0985537	174907	0900	Terracería	Conexa a carretera	Camión de redilas o troca	Más de 1.5 y hasta 2 horas	De 1 a 5 salidas al día	De 75 a 99 pesos	Con hablantes de lengua indígena	Náhuatl	SI	SI	NO	SI	NO	Agricultura	NE	NE	NO	NO	SI	NO	SI	Alcoholismo o drogadicción	NE	Disponibilidad de red de agua NE	NE	Disponibilidad NE	NE	NE	Recolección y limpieza NE	NE	NE	NE	NE	NE	NE	NE	NE	NE	NE	NE	NE
12	Guerrero	002	Ahuacuotzingo	0036	Chinantla	0990003	174711	1242	Terracería	Conexa a carretera	No hay transporte	No hay transporte	No hay transporte	No hay transporte	Sin hablantes de lengua indígena	Sin hablantes de lengua indígena	Sin hablantes de lengua indígena	Sin hablantes de lengua indígena	Sin hablantes de lengua indígena	Sin hablantes de lengua indígena	Sin hablantes de lengua indígena	Agricultura	Cría y explotación de animales	NE	NO	NO	NO	NO	NO	No especificado	NA	NA	NA	NA	NA	NA	NA	NA	NA	NA	NA	NA	NA	NA	NA	NA	NA	NA	NA
12	Guerrero	002	Ahuacuotzingo	0038	El Huamúchil	0985634	174449	1231	Terracería	Conexa a carretera	No hay transporte	No hay transporte	No hay transporte	No hay transporte	Sin hablantes de lengua indígena	Sin hablantes de lengua indígena	Sin hablantes de lengua indígena	Sin hablantes de lengua indígena	Sin hablantes de lengua indígena	Sin hablantes de lengua indígena	Sin hablantes de lengua indígena	Agricultura	NE	NE	NO	NO	NO	NO	NO	Falta de infraestructura o servicio de agua	NA	NA	NA	NA	NA	NA	NA	NA	NA	NA	NA	NA	NA	NA	NA	NA	NA	NA	NA
12	Guerrero	002	Ahuacuotzingo	0040	Tenextepantla	0990128	174249	1049	No conexa a carretera	De 1 a 3 km	No hay transporte	No hay transporte	No hay transporte	No hay transporte	Sin hablantes de lengua indígena	Sin hablantes de lengua indígena	Sin hablantes de lengua indígena	Sin hablantes de lengua indígena	Sin hablantes de lengua indígena	Sin hablantes de lengua indígena	Sin hablantes de lengua indígena	Agricultura	NE	NE	NO	NO	NO	NO	NO	Sequía, inundaciones o clima adverso	NA	NA	NA	NA	NA	NA	NA	NA	NA	NA	NA	NA	NA	NA	NA	NA	NA	NA	NA
12	Guerrero	002	Ahuacuotzingo	0041	Yerbabuena	0990048	174443	0926	Terracería	Conexa a carretera	No hay transporte	No hay transporte	No hay transporte	No hay transporte	Sin hablantes de lengua indígena	Sin hablantes de lengua indígena	Sin hablantes de lengua indígena	Sin hablantes de lengua indígena	Sin hablantes de lengua indígena	Sin hablantes de lengua indígena	Sin hablantes de lengua indígena	Agricultura	Cría y explotación de animales	NE	NO	NO	NO	NO	NO	No especificado	NA	NA	NA	NA	NA	NA	NA	NA	NA	NA	NA	NA	NA	NA	NA	NA	NA	NA	NA
12	Guerrero	002	Ahuacuotzingo	0045	Atliaca	0985454	174146	1185	Pavimentada	Conexa a carretera	Micro, combi o camioneta	DE 15 A 19 MIN	De 6 a 10 salidas al día	De 10 a 14 pesos	Sin hablantes de lengua indígena	Sin hablantes de lengua indígena	Sin hablantes de lengua indígena	Sin hablantes de lengua indígena	Sin hablantes de lengua indígena	Sin hablantes de lengua indígena	Sin hablantes de lengua indígena	Agricultura	NE	NE	NO	SI	SI	NO	NO	Otra clase de problema	NA	NA	NA	NA	NA	NA	NA	NA	NA	NA	NA	NA	NA	NA	NA	NA	NA	NA	NA
12	Guerrero	002	Ahuacuotzingo	0050	El Carrizo	0984934	174313	1613	Terracería	Conexa a carretera	No hay transporte	No hay transporte	No hay transporte	No hay transporte	Con hablantes de lengua indígena	Náhuatl	SI	SI	SI	SI	SI	Agricultura	Fabricación de prendas de vestir	Cría y explotación de animales	NO	NO	NO	NO	NO	Pobreza o marginación	NA	NA	NA	NA	NA	NA	NA	NA	NA	NA	NA	NA	NA	NA	NA	NA	NA	NA	NA
12	Guerrero	002	Ahuacuotzingo	0051	Chautipa	0985236	174604	1526	No conexa a carretera	De 31 a 40 km	No hay transporte	No hay transporte	No hay transporte	No hay transporte	Sin hablantes de lengua indígena	Sin hablantes de lengua indígena	Sin hablantes de lengua indígena	Sin hablantes de lengua indígena	Sin hablantes de lengua indígena	Sin hablantes de lengua indígena	Sin hablantes de lengua indígena	Agricultura	Cría y explotación de animales	Agricultura	NO	NO	NO	NO	NO	Sin problema	NA	NA	NA	NA	NA	NA	NA	NA	NA	NA	NA	NA	NA	NA	NA	NA	NA	NA	NA
12	Guerrero	002	Ahuacuotzingo	0055	Loma Alta	0985344	175010	1110	Terracería	Conexa a carretera	Disponibilidad de transporte NE	Disponibilidad de transporte NE	Disponibilidad de transporte NE	Disponibilidad de transporte NE	Sin hablantes de lengua indígena	Sin hablantes de lengua indígena	Sin hablantes de lengua indígena	Sin hablantes de lengua indígena	Sin hablantes de lengua indígena	Sin hablantes de lengua indígena	Sin hablantes de lengua indígena	Agricultura	NE	NE	NO	NO	NO	NO	NO	Sin problema	NA	NA	NA	NA	NA	NA	NA	NA	NA	NA	NA	NA	NA	NA	NA	NA	NA	NA	NA
12	Guerrero	002	Ahuacuotzingo	0056	Las Jícaras (El Mirador)	0985301	175009	1158	Terracería	Conexa a carretera	No hay transporte	No hay transporte	No hay transporte	No hay transporte	Sin hablantes de lengua indígena	Sin hablantes de lengua indígena	Sin hablantes de lengua indígena	Sin hablantes de lengua indígena	Sin hablantes de lengua indígena	Sin hablantes de lengua indígena	Sin hablantes de lengua indígena	Agricultura	NE	NE	NO	NO	NO	NO	NO	Sin problema	NA	NA	NA	NA	NA	NA	NA	NA	NA	NA	NA	NA	NA	NA	NA	NA	NA	NA	NA
12	Guerrero	002	Ahuacuotzingo	0058	El Naranjo	0985156	174752	1298	No conexa a carretera	De 4 a 10 km	No hay transporte	No hay transporte	No hay transporte	No hay transporte	Sin hablantes de lengua indígena	Sin hablantes de lengua indígena	Sin hablantes de lengua indígena	Sin hablantes de lengua indígena	Sin hablantes de lengua indígena	Sin hablantes de lengua indígena	Sin hablantes de lengua indígena	Agricultura	Cría y explotación de animales	NE	NO	NO	NO	NO	NO	Sin problema	NA	NA	NA	NA	NA	NA	NA	NA	NA	NA	NA	NA	NA	NA	NA	NA	NA	NA	NA
12	Guerrero	002	Ahuacuotzingo	0062	El Planchado	0985439	174946	0934	Terracería	Conexa a carretera	No hay transporte	No hay transporte	No hay transporte	No hay transporte	Sin hablantes de lengua indígena	Sin hablantes de lengua indígena	Sin hablantes de lengua indígena	Sin hablantes de lengua indígena	Sin hablantes de lengua indígena	Sin hablantes de lengua indígena	Sin hablantes de lengua indígena	Agricultura	NE	NE	NO	NO	NO	NO	NO	Sin problema	NA	NA	NA	NA	NA	NA	NA	NA	NA	NA	NA	NA	NA	NA	NA	NA	NA	NA	NA
12	Guerrero	002	Ahuacuotzingo	0066	Teonoxtla	0985241	174146	1382	NE	Conexión a carretera NE	Disponibilidad de transporte NE	Disponibilidad de transporte NE	Disponibilidad de transporte NE	Disponibilidad de transporte NE	NE	Hablantes de lengua indígena NE	Hablantes de lengua indígena NE	Hablantes de lengua indígena NE	Hablantes de lengua indígena NE	Hablantes de lengua indígena NE	Hablantes de lengua indígena NE	NE	NE	NE	NE	NE	NE	NE	NE	No especificado	NA	NA	NA	NA	NA	NA	NA	NA	NA	NA	NA	NA	NA	NA	NA	NA	NA	NA	NA
12	Guerrero	002	Ahuacuotzingo	0069	Expitetzintla	0984734	174348	1560	Terracería	Conexa a carretera	No hay transporte	No hay transporte	No hay transporte	No hay transporte	Con hablantes de lengua indígena	Náhuatl	SI	SI	SI	SI	SI	Agricultura	Fabricación de prendas de vestir	Cría y explotación de animales	NO	NO	NO	NO	NO	Pobreza o marginación	NA	NA	NA	NA	NA	NA	NA	NA	NA	NA	NA	NA	NA	NA	NA	NA	NA	NA	NA
12	Guerrero	002	Ahuacuotzingo	0070	Tierra Blanca	0985514	174223	1197	Terracería	Conexa a carretera	No hay transporte	No hay transporte	No hay transporte	No hay transporte	Sin hablantes de lengua indígena	Sin hablantes de lengua indígena	Sin hablantes de lengua indígena	Sin hablantes de lengua indígena	Sin hablantes de lengua indígena	Sin hablantes de lengua indígena	Sin hablantes de lengua indígena	Agricultura	NE	NE	NO	SI	NO	NO	NO	Otra clase de problema	NA	NA	NA	NA	NA	NA	NA	NA	NA	NA	NA	NA	NA	NA	NA	NA	NA	NA	NA
12	Guerrero	002	Ahuacuotzingo	0072	Tlalistaquilla	0984842	174111	1414	Terracería	Conexa a carretera	No hay transporte	No hay transporte	No hay transporte	No hay transporte	Con hablantes de lengua indígena	Náhuatl	SI	SI	NO	NO	SI	Agricultura	Fabricación de prendas de vestir	NE	NO	NO	NO	NO	NO	Falta de infraestructura o servicio de agua	NA	NA	NA	NA	NA	NA	NA	NA	NA	NA	NA	NA	NA	NA	NA	NA	NA	NA	NA
12	Guerrero	002	Ahuacuotzingo	0075	Zacualpa	0984903	174133	1462	Terracería	Conexa a carretera	No hay transporte	No hay transporte	No hay transporte	No hay transporte	Con hablantes de lengua indígena	Náhuatl	SI	SI	SI	SI	SI	Agricultura	Fabricación de prendas de vestir	NE	NO	NO	NO	NO	NO	Falta de carretera o transporte	NE	Disponibilidad de red de agua NE	NE	Disponibilidad NE	NE	NE	Recolección y limpieza NE	NE	NE	NE	NE	NE	NE	NE	NE	NE	NE	NE	NE
12	Guerrero	002	Ahuacuotzingo	0076	Xumiltepec	0985144	174248	1393	Terracería	Conexa a carretera	No hay transporte	No hay transporte	No hay transporte	No hay transporte	Con hablantes de lengua indígena	Náhuatl	SI	SI	SI	SI	SI	Agricultura	Fabricación de prendas de vestir	Cría y explotación de animales	NO	NO	NO	NO	NO	Sin problema	NE	Disponibilidad de red de agua NE	NE	Disponibilidad NE	NE	NE	Recolección y limpieza NE	NE	NE	NE	NE	NE	NE	NE	NE	NE	NE	NE	NE
12	Guerrero	002	Ahuacuotzingo	0077	Buena Vista	0985204	174159	1222	Terracería	Conexa a carretera	No hay transporte	No hay transporte	No hay transporte	No hay transporte	Con hablantes de lengua indígena	Náhuatl	SI	SI	SI	SI	SI	Agricultura	Cría y explotación de animales	NE	NO	NO	NO	NO	NO	Falta de empleo o emigración	NA	NA	NA	NA	NA	NA	NA	NA	NA	NA	NA	NA	NA	NA	NA	NA	NA	NA	NA
12	Guerrero	002	Ahuacuotzingo	0078	Tlaxintle Morado	0985532	175027	0899	Terracería	Conexa a carretera	No hay transporte	No hay transporte	No hay transporte	No hay transporte	Sin hablantes de lengua indígena	Sin hablantes de lengua indígena	Sin hablantes de lengua indígena	Sin hablantes de lengua indígena	Sin hablantes de lengua indígena	Sin hablantes de lengua indígena	Sin hablantes de lengua indígena	Agricultura	NE	NE	NO	NO	NO	NO	NO	Sin problema	NA	NA	NA	NA	NA	NA	NA	NA	NA	NA	NA	NA	NA	NA	NA	NA	NA	NA	NA
12	Guerrero	002	Ahuacuotzingo	0079	Lambedero	0985236	174758	1245	Terracería	Conexa a carretera	Camión de redilas o troca	Más de 2 y hasta 3 horas	De 1 a 5 salidas al día	De 120 a 149 pesos	Con hablantes de lengua indígena	Náhuatl	NO	SI	NO	SI	NO	Agricultura	Cría y explotación de animales	NE	NO	NO	NO	NO	NO	Falta de equipamiento o servicios para la educación	NA	NA	NA	NA	NA	NA	NA	NA	NA	NA	NA	NA	NA	NA	NA	NA	NA	NA	NA
12	Guerrero	002	Ahuacuotzingo	0080	Mazatlán (San José)	0984855	174216	1485	Terracería	Conexa a carretera	No hay transporte	No hay transporte	No hay transporte	No hay transporte	Con hablantes de lengua indígena	Náhuatl	SI	NO	SI	SI	SI	Agricultura	Fabricación de prendas de vestir	NE	NO	NO	NO	NO	NO	Falta de energía eléctrica	NA	NA	NA	NA	NA	NA	NA	NA	NA	NA	NA	NA	NA	NA	NA	NA	NA	NA	NA
12	Guerrero	002	Ahuacuotzingo	0081	Motuapa	0990218	174435	1333	Terracería	Conexa a carretera	No hay transporte	No hay transporte	No hay transporte	No hay transporte	Sin hablantes de lengua indígena	Sin hablantes de lengua indígena	Sin hablantes de lengua indígena	Sin hablantes de lengua indígena	Sin hablantes de lengua indígena	Sin hablantes de lengua indígena	Sin hablantes de lengua indígena	Agricultura	Cría y explotación de animales	NE	NO	NO	NO	NO	NO	No especificado	NA	NA	NA	NA	NA	NA	NA	NA	NA	NA	NA	NA	NA	NA	NA	NA	NA	NA	NA
12	Guerrero	002	Ahuacuotzingo	0082	Los Sauces	0985251	174727	1160	NE	Conexión a carretera NE	Disponibilidad de transporte NE	Disponibilidad de transporte NE	Disponibilidad de transporte NE	Disponibilidad de transporte NE	NE	Hablantes de lengua indígena NE	Hablantes de lengua indígena NE	Hablantes de lengua indígena NE	Hablantes de lengua indígena NE	Hablantes de lengua indígena NE	Hablantes de lengua indígena NE	NE	NE	NE	NE	NE	NE	NE	NE	No especificado	NA	NA	NA	NA	NA	NA	NA	NA	NA	NA	NA	NA	NA	NA	NA	NA	NA	NA	NA
12	Guerrero	002	Ahuacuotzingo	0083	Tlalchichilco	0985110	174210	1459	Terracería	Conexa a carretera	No hay transporte	No hay transporte	No hay transporte	No hay transporte	Con hablantes de lengua indígena	Náhuatl	SI	SI	SI	SI	SI	Agricultura	Fabricación de prendas de vestir	NE	SI	SI	SI	SI	SI	Pobreza o marginación	NA	NA	NA	NA	NA	NA	NA	NA	NA	NA	NA	NA	NA	NA	NA	NA	NA	NA	NA
12	Guerrero	002	Ahuacuotzingo	0084	Tlalistac	0985054	174235	1514	Terracería	Conexa a carretera	No hay transporte	No hay transporte	No hay transporte	No hay transporte	Con hablantes de lengua indígena	Náhuatl	SI	SI	SI	SI	SI	Agricultura	Fabricación de prendas de vestir	Administración pública federal	NO	NO	NO	NO	NO	Sin problema	NA	NA	NA	NA	NA	NA	NA	NA	NA	NA	NA	NA	NA	NA	NA	NA	NA	NA	NA
12	Guerrero	002	Ahuacuotzingo	0085	Zapotitlán	0985036	174203	1447	No conexa a carretera	De 1 a 3 km	No hay transporte	No hay transporte	No hay transporte	No hay transporte	Con hablantes de lengua indígena	Náhuatl	SI	SI	SI	SI	SI	Agricultura	Fabricación de prendas de vestir	Cría y explotación de animales	NO	NO	NO	NO	NO	Sin problema	NA	NA	NA	NA	NA	NA	NA	NA	NA	NA	NA	NA	NA	NA	NA	NA	NA	NA	NA
12	Guerrero	002	Ahuacuotzingo	0086	Zonteconcuilco	0984937	174239	1563	Terracería	Conexa a carretera	No hay transporte	No hay transporte	No hay transporte	No hay transporte	Con hablantes de lengua indígena	Náhuatl	SI	SI	SI	SI	SI	Agricultura	Fabricación de prendas de vestir	Cría y explotación de animales	NO	NO	NO	NO	NO	Sin problema	NA	NA	NA	NA	NA	NA	NA	NA	NA	NA	NA	NA	NA	NA	NA	NA	NA	NA	NA
12	Guerrero	002	Ahuacuotzingo	0090	Costliapa	0985452	174037	1342	Pavimentada	Conexa a carretera	Micro, combi o camioneta	De 20 a 24 min	De 6 a 10 salidas al día	De 20 a 24 pesos	Sin hablantes de lengua indígena	Sin hablantes de lengua indígena	Sin hablantes de lengua indígena	Sin hablantes de lengua indígena	Sin hablantes de lengua indígena	Sin hablantes de lengua indígena	Sin hablantes de lengua indígena	Agricultura	NE	NE	NO	SI	SI	NO	NO	Otra clase de problema	NA	NA	NA	NA	NA	NA	NA	NA	NA	NA	NA	NA	NA	NA	NA	NA	NA	NA	NA
12	Guerrero	002	Ahuacuotzingo	0093	La Tabernita	0990231	174401	1347	Terracería	Conexa a carretera	No hay transporte	No hay transporte	No hay transporte	No hay transporte	Sin hablantes de lengua indígena	Sin hablantes de lengua indígena	Sin hablantes de lengua indígena	Sin hablantes de lengua indígena	Sin hablantes de lengua indígena	Sin hablantes de lengua indígena	Sin hablantes de lengua indígena	Agricultura	Cría y explotación de animales	Agricultura	NO	NO	NO	NO	NO	No especificado	NA	NA	NA	NA	NA	NA	NA	NA	NA	NA	NA	NA	NA	NA	NA	NA	NA	NA	NA
12	Guerrero	002	Ahuacuotzingo	0094	Los Paredones (Joyas de Yolocingo)	0985405	175044	1220	Terracería	Conexa a carretera	No hay transporte	No hay transporte	No hay transporte	No hay transporte	Sin hablantes de lengua indígena	Sin hablantes de lengua indígena	Sin hablantes de lengua indígena	Sin hablantes de lengua indígena	Sin hablantes de lengua indígena	Sin hablantes de lengua indígena	Sin hablantes de lengua indígena	Agricultura	NE	NE	NO	NO	NO	NO	NO	Sin problema	NA	NA	NA	NA	NA	NA	NA	NA	NA	NA	NA	NA	NA	NA	NA	NA	NA	NA	NA
12	Guerrero	002	Ahuacuotzingo	0095	Polaica	0984944	174254	1535	No conexa a carretera	De 1 a 3 km	No hay transporte	No hay transporte	No hay transporte	No hay transporte	Con hablantes de lengua indígena	Náhuatl	SI	SI	SI	SI	SI	Agricultura	Fabricación de prendas de vestir	Cría y explotación de animales	NO	NO	NO	NO	NO	Sin problema	NA	NA	NA	NA	NA	NA	NA	NA	NA	NA	NA	NA	NA	NA	NA	NA	NA	NA	NA
12	Guerrero	002	Ahuacuotzingo	0096	Santa Rosa	0984629	174319	1684	Terracería	Conexa a carretera	No hay transporte	No hay transporte	No hay transporte	No hay transporte	Con hablantes de lengua indígena	Náhuatl	SI	SI	SI	SI	SI	Agricultura	Fabricación de prendas de vestir	NE	NO	NO	NO	NO	NO	Falta de abasto o comercio	NA	NA	NA	NA	NA	NA	NA	NA	NA	NA	NA	NA	NA	NA	NA	NA	NA	NA	NA
12	Guerrero	002	Ahuacuotzingo	0098	Xaxocoite	0985016	174325	1525	No conexa a carretera	De 1 a 3 km	No hay transporte	No hay transporte	No hay transporte	No hay transporte	Con hablantes de lengua indígena	Náhuatl	SI	SI	SI	SI	SI	Agricultura	Fabricación de prendas de vestir	Cría y explotación de animales	NO	NO	NO	NO	NO	Pobreza o marginación	NA	NA	NA	NA	NA	NA	NA	NA	NA	NA	NA	NA	NA	NA	NA	NA	NA	NA	NA
12	Guerrero	002	Ahuacuotzingo	0100	Azaucla	0985647	174509	1177	No conexa a carretera	Distancia NE	No hay transporte	No hay transporte	No hay transporte	No hay transporte	Sin hablantes de lengua indígena	Sin hablantes de lengua indígena	Sin hablantes de lengua indígena	Sin hablantes de lengua indígena	Sin hablantes de lengua indígena	Sin hablantes de lengua indígena	Sin hablantes de lengua indígena	Agricultura	Cría y explotación de animales	NE	NO	NO	NO	NO	NO	Sin problema	NA	NA	NA	NA	NA	NA	NA	NA	NA	NA	NA	NA	NA	NA	NA	NA	NA	NA	NA
12	Guerrero	002	Ahuacuotzingo	0107	Loma Bonita	0984858	174052	1434	Terracería	Conexa a carretera	No hay transporte	No hay transporte	No hay transporte	No hay transporte	Con hablantes de lengua indígena	Náhuatl	SI	SI	SI	SI	SI	Agricultura	NE	NE	NO	NO	NO	NO	NO	Falta de abasto o comercio	NA	NA	NA	NA	NA	NA	NA	NA	NA	NA	NA	NA	NA	NA	NA	NA	NA	NA	NA
12	Guerrero	002	Ahuacuotzingo	0110	Pangomolijca	0990114	174332	1015	Pavimentada	Conexa a carretera	Micro, combi o camioneta	De 30 a 60 min	De 31 a 60 salidas al día	De 20 a 24 pesos	Sin hablantes de lengua indígena	Sin hablantes de lengua indígena	Sin hablantes de lengua indígena	Sin hablantes de lengua indígena	Sin hablantes de lengua indígena	Sin hablantes de lengua indígena	Sin hablantes de lengua indígena	Agricultura	NE	NE	NO	NO	NO	NO	NO	No especificado	NA	NA	NA	NA	NA	NA	NA	NA	NA	NA	NA	NA	NA	NA	NA	NA	NA	NA	NA
12	Guerrero	002	Ahuacuotzingo	0114	San Antonio (Tecomatlán)	0990038	174355	0943	Terracería	Conexa a carretera	No hay transporte	No hay transporte	No hay transporte	No hay transporte	Sin hablantes de lengua indígena	Sin hablantes de lengua indígena	Sin hablantes de lengua indígena	Sin hablantes de lengua indígena	Sin hablantes de lengua indígena	Sin hablantes de lengua indígena	Sin hablantes de lengua indígena	Agricultura	Cría y explotación de animales	NE	NO	NO	NO	NO	NO	No especificado	NA	NA	NA	NA	NA	NA	NA	NA	NA	NA	NA	NA	NA	NA	NA	NA	NA	NA	NA
12	Guerrero	002	Ahuacuotzingo	0115	Tezoquite (Tierra Prieta)	0990301	174225	1397	Pavimentada	Conexa a carretera	No hay transporte	No hay transporte	No hay transporte	No hay transporte	Sin hablantes de lengua indígena	Sin hablantes de lengua indígena	Sin hablantes de lengua indígena	Sin hablantes de lengua indígena	Sin hablantes de lengua indígena	Sin hablantes de lengua indígena	Sin hablantes de lengua indígena	Agricultura	Otras industrias manufactureras	Fabricación de productos textiles, excepto prendas de vestir	NO	NO	NO	NO	NO	Falta de infraestructura o servicio de agua	NA	NA	NA	NA	NA	NA	NA	NA	NA	NA	NA	NA	NA	NA	NA	NA	NA	NA	NA
12	Guerrero	002	Ahuacuotzingo	0122	Castocapa	0985553	174220	1442	Pavimentada	Conexa a carretera	Micro, combi o camioneta	De 3 a 9 min	De 6 a 10 salidas al día	De 3 a 6 pesos	Sin hablantes de lengua indígena	Sin hablantes de lengua indígena	Sin hablantes de lengua indígena	Sin hablantes de lengua indígena	Sin hablantes de lengua indígena	Sin hablantes de lengua indígena	Sin hablantes de lengua indígena	Agricultura	NE	NE	NO	SI	NO	NO	NO	Otra clase de problema	NA	NA	NA	NA	NA	NA	NA	NA	NA	NA	NA	NA	NA	NA	NA	NA	NA	NA	NA
12	Guerrero	002	Ahuacuotzingo	0126	La Loma de Rancho Viejo (Loma Tamalajayo)	0985434	174320	1430	No conexa a carretera	Distancia NE	No hay transporte	No hay transporte	No hay transporte	No hay transporte	Sin hablantes de lengua indígena	Sin hablantes de lengua indígena	Sin hablantes de lengua indígena	Sin hablantes de lengua indígena	Sin hablantes de lengua indígena	Sin hablantes de lengua indígena	Sin hablantes de lengua indígena	Agricultura	NE	NE	NO	SI	SI	NO	NO	Otra clase de problema	NA	NA	NA	NA	NA	NA	NA	NA	NA	NA	NA	NA	NA	NA	NA	NA	NA	NA	NA
12	Guerrero	002	Ahuacuotzingo	0128	Quimixtepec	0985315	174421	1672	NE	Conexión a carretera NE	Disponibilidad de transporte NE	Disponibilidad de transporte NE	Disponibilidad de transporte NE	Disponibilidad de transporte NE	NE	Hablantes de lengua indígena NE	Hablantes de lengua indígena NE	Hablantes de lengua indígena NE	Hablantes de lengua indígena NE	Hablantes de lengua indígena NE	Hablantes de lengua indígena NE	NE	NE	NE	NE	NE	NE	NE	NE	No especificado	NA	NA	NA	NA	NA	NA	NA	NA	NA	NA	NA	NA	NA	NA	NA	NA	NA	NA	NA
12	Guerrero	002	Ahuacuotzingo	0130	Tlalxocotitlán	0984753	174315	1572	Terracería	Conexa a carretera	No hay transporte	No hay transporte	No hay transporte	No hay transporte	Con hablantes de lengua indígena	Náhuatl	SI	SI	SI	SI	SI	Agricultura	Fabricación de prendas de vestir	Cría y explotación de animales	NO	NO	NO	NO	NO	Pobreza o marginación	NA	NA	NA	NA	NA	NA	NA	NA	NA	NA	NA	NA	NA	NA	NA	NA	NA	NA	NA
12	Guerrero	002	Ahuacuotzingo	0133	Zacayautla	0985418	174106	1311	NE	Conexión a carretera NE	Disponibilidad de transporte NE	Disponibilidad de transporte NE	Disponibilidad de transporte NE	Disponibilidad de transporte NE	NE	Hablantes de lengua indígena NE	Hablantes de lengua indígena NE	Hablantes de lengua indígena NE	Hablantes de lengua indígena NE	Hablantes de lengua indígena NE	Hablantes de lengua indígena NE	NE	NE	NE	NE	NE	NE	NE	NE	No especificado	NA	NA	NA	NA	NA	NA	NA	NA	NA	NA	NA	NA	NA	NA	NA	NA	NA	NA	NA
12	Guerrero	002	Ahuacuotzingo	0144	El Terrero	0984928	174058	1280	Terracería	Conexa a carretera	No hay transporte	No hay transporte	No hay transporte	No hay transporte	Con hablantes de lengua indígena	Náhuatl	SI	NO	NO	NO	NO	Agricultura	Fabricación de prendas de vestir	NE	NO	NO	NO	NO	NO	Falta de energía eléctrica	NA	NA	NA	NA	NA	NA	NA	NA	NA	NA	NA	NA	NA	NA	NA	NA	NA	NA	NA
12	Guerrero	002	Ahuacuotzingo	0147	Ocotepec	0984822	174228	1584	Terracería	Conexa a carretera	No hay transporte	No hay transporte	No hay transporte	No hay transporte	Con hablantes de lengua indígena	Náhuatl	SI	SI	SI	SI	SI	Agricultura	Fabricación de prendas de vestir	Cría y explotación de animales	NO	NO	NO	NO	NO	Falta de apoyo o deficiencia gubernamental	NA	NA	NA	NA	NA	NA	NA	NA	NA	NA	NA	NA	NA	NA	NA	NA	NA	NA	NA
12	Guerrero	002	Ahuacuotzingo	0148	San Andrés	0984706	174215	1747	Terracería	Conexa a carretera	No hay transporte	No hay transporte	No hay transporte	No hay transporte	Con hablantes de lengua indígena	Náhuatl	SI	SI	SI	SI	SI	Agricultura	Fabricación de prendas de vestir	NE	NO	NO	NO	NO	NO	Falta de carretera o transporte	NA	NA	NA	NA	NA	NA	NA	NA	NA	NA	NA	NA	NA	NA	NA	NA	NA	NA	NA
12	Guerrero	002	Ahuacuotzingo	0149	San Francisco	0984637	174119	2008	Terracería	Conexa a carretera	No hay transporte	No hay transporte	No hay transporte	No hay transporte	Con hablantes de lengua indígena	Náhuatl	SI	SI	SI	SI	SI	Agricultura	Fabricación de prendas de vestir	NE	NO	NO	NO	NO	NO	Falta de abasto o comercio	NA	NA	NA	NA	NA	NA	NA	NA	NA	NA	NA	NA	NA	NA	NA	NA	NA	NA	NA
12	Guerrero	002	Ahuacuotzingo	0150	El Terrero	0990055	174628	1145	Terracería	Conexa a carretera	No hay transporte	No hay transporte	No hay transporte	No hay transporte	Sin hablantes de lengua indígena	Sin hablantes de lengua indígena	Sin hablantes de lengua indígena	Sin hablantes de lengua indígena	Sin hablantes de lengua indígena	Sin hablantes de lengua indígena	Sin hablantes de lengua indígena	Agricultura	Cría y explotación de animales	NE	NO	NO	NO	NO	NO	No especificado	NA	NA	NA	NA	NA	NA	NA	NA	NA	NA	NA	NA	NA	NA	NA	NA	NA	NA	NA
12	Guerrero	002	Ahuacuotzingo	0151	Vista Hermosa Tlaquilcingo	0985519	175133	1140	Terracería	Conexa a carretera	No hay transporte	No hay transporte	No hay transporte	No hay transporte	Sin hablantes de lengua indígena	Sin hablantes de lengua indígena	Sin hablantes de lengua indígena	Sin hablantes de lengua indígena	Sin hablantes de lengua indígena	Sin hablantes de lengua indígena	Sin hablantes de lengua indígena	Agricultura	NE	NE	NO	NO	NO	NO	NO	Sin problema	NA	NA	NA	NA	NA	NA	NA	NA	NA	NA	NA	NA	NA	NA	NA	NA	NA	NA	NA
12	Guerrero	002	Ahuacuotzingo	0154	Los Amates (La Pochotera)	0985614	174915	0885	NE	Conexión a carretera NE	Disponibilidad de transporte NE	Disponibilidad de transporte NE	Disponibilidad de transporte NE	Disponibilidad de transporte NE	NE	Hablantes de lengua indígena NE	Hablantes de lengua indígena NE	Hablantes de lengua indígena NE	Hablantes de lengua indígena NE	Hablantes de lengua indígena NE	Hablantes de lengua indígena NE	NE	NE	NE	NE	NE	NE	NE	NE	No especificado	NA	NA	NA	NA	NA	NA	NA	NA	NA	NA	NA	NA	NA	NA	NA	NA	NA	NA	NA
12	Guerrero	002	Ahuacuotzingo	0156	Los Encinitos	0985403	174958	0991	Terracería	Conexa a carretera	No hay transporte	No hay transporte	No hay transporte	No hay transporte	Sin hablantes de lengua indígena	Sin hablantes de lengua indígena	Sin hablantes de lengua indígena	Sin hablantes de lengua indígena	Sin hablantes de lengua indígena	Sin hablantes de lengua indígena	Sin hablantes de lengua indígena	Agricultura	NE	NE	NO	NO	NO	NO	NO	Sin problema	NA	NA	NA	NA	NA	NA	NA	NA	NA	NA	NA	NA	NA	NA	NA	NA	NA	NA	NA
12	Guerrero	002	Ahuacuotzingo	0159	Las Pozas	0985133	175027	1234	Terracería	Conexa a carretera	No hay transporte	No hay transporte	No hay transporte	No hay transporte	Sin hablantes de lengua indígena	Sin hablantes de lengua indígena	Sin hablantes de lengua indígena	Sin hablantes de lengua indígena	Sin hablantes de lengua indígena	Sin hablantes de lengua indígena	Sin hablantes de lengua indígena	Agricultura	NE	NE	NO	NO	NO	NO	NO	Sin problema	NA	NA	NA	NA	NA	NA	NA	NA	NA	NA	NA	NA	NA	NA	NA	NA	NA	NA	NA
12	Guerrero	002	Ahuacuotzingo	0160	Rancho Francisca Nava	0985256	174944	1053	Terracería	Conexa a carretera	No hay transporte	No hay transporte	No hay transporte	No hay transporte	Sin hablantes de lengua indígena	Sin hablantes de lengua indígena	Sin hablantes de lengua indígena	Sin hablantes de lengua indígena	Sin hablantes de lengua indígena	Sin hablantes de lengua indígena	Sin hablantes de lengua indígena	Agricultura	NE	NE	NO	NO	NO	NO	NO	Sin problema	NA	NA	NA	NA	NA	NA	NA	NA	NA	NA	NA	NA	NA	NA	NA	NA	NA	NA	NA
12	Guerrero	002	Ahuacuotzingo	0161	El Rincón	0985044	174753	1382	No conexa a carretera	De 31 a 40 km	No hay transporte	No hay transporte	No hay transporte	No hay transporte	Sin hablantes de lengua indígena	Sin hablantes de lengua indígena	Sin hablantes de lengua indígena	Sin hablantes de lengua indígena	Sin hablantes de lengua indígena	Sin hablantes de lengua indígena	Sin hablantes de lengua indígena	Agricultura	Cría y explotación de animales	NE	NO	NO	NO	NO	NO	Sin problema	NA	NA	NA	NA	NA	NA	NA	NA	NA	NA	NA	NA	NA	NA	NA	NA	NA	NA	NA
12	Guerrero	002	Ahuacuotzingo	0162	Yetlán	0985855	174612	0882	NE	Conexión a carretera NE	Disponibilidad de transporte NE	Disponibilidad de transporte NE	Disponibilidad de transporte NE	Disponibilidad de transporte NE	NE	Hablantes de lengua indígena NE	Hablantes de lengua indígena NE	Hablantes de lengua indígena NE	Hablantes de lengua indígena NE	Hablantes de lengua indígena NE	Hablantes de lengua indígena NE	NE	NE	NE	NE	NE	NE	NE	NE	No especificado	NA	NA	NA	NA	NA	NA	NA	NA	NA	NA	NA	NA	NA	NA	NA	NA	NA	NA	NA
12	Guerrero	002	Ahuacuotzingo	0168	Contlapalchoco (El Cuatecomate)	0985658	174500	1107	NE	Conexión a carretera NE	Disponibilidad de transporte NE	Disponibilidad de transporte NE	Disponibilidad de transporte NE	Disponibilidad de transporte NE	NE	Hablantes de lengua indígena NE	Hablantes de lengua indígena NE	Hablantes de lengua indígena NE	Hablantes de lengua indígena NE	Hablantes de lengua indígena NE	Hablantes de lengua indígena NE	NE	NE	NE	NE	NE	NE	NE	NE	No especificado	NA	NA	NA	NA	NA	NA	NA	NA	NA	NA	NA	NA	NA	NA	NA	NA	NA	NA	NA
12	Guerrero	002	Ahuacuotzingo	0175	Martina García Godínez	0985307	174259	1493	No conexa a carretera	Distancia NE	No hay transporte	No hay transporte	No hay transporte	No hay transporte	Sin hablantes de lengua indígena	Sin hablantes de lengua indígena	Sin hablantes de lengua indígena	Sin hablantes de lengua indígena	Sin hablantes de lengua indígena	Sin hablantes de lengua indígena	Sin hablantes de lengua indígena	Agricultura	NE	NE	NO	SI	SI	NO	NO	Otra clase de problema	NA	NA	NA	NA	NA	NA	NA	NA	NA	NA	NA	NA	NA	NA	NA	NA	NA	NA	NA
12	Guerrero	002	Ahuacuotzingo	0176	Mazatlán	0984637	174153	1949	Terracería	Conexa a carretera	No hay transporte	No hay transporte	No hay transporte	No hay transporte	Con hablantes de lengua indígena	Náhuatl	SI	SI	NO	NO	SI	Agricultura	Fabricación de prendas de vestir	NE	NO	NO	NO	NO	NO	Falta de energía eléctrica	NA	NA	NA	NA	NA	NA	NA	NA	NA	NA	NA	NA	NA	NA	NA	NA	NA	NA	NA
12	Guerrero	002	Ahuacuotzingo	0180	El Ranchito	0990257	174233	1370	Pavimentada	Conexa a carretera	Micro, combi o camioneta	Tiempo de traslado NE	De 31 a 60 salidas al día	De 25 a 29 pesos	Sin hablantes de lengua indígena	Sin hablantes de lengua indígena	Sin hablantes de lengua indígena	Sin hablantes de lengua indígena	Sin hablantes de lengua indígena	Sin hablantes de lengua indígena	Sin hablantes de lengua indígena	Agricultura	NE	NE	NO	NO	NO	NO	NO	Falta de infraestructura o servicio de agua	NA	NA	NA	NA	NA	NA	NA	NA	NA	NA	NA	NA	NA	NA	NA	NA	NA	NA	NA
12	Guerrero	002	Ahuacuotzingo	0181	Parada de Tecoanapa	0990323	174130	1397	Terracería	Conexa a carretera	No hay transporte	No hay transporte	No hay transporte	No hay transporte	Sin hablantes de lengua indígena	Sin hablantes de lengua indígena	Sin hablantes de lengua indígena	Sin hablantes de lengua indígena	Sin hablantes de lengua indígena	Sin hablantes de lengua indígena	Sin hablantes de lengua indígena	Agricultura	NE	NE	NO	NO	NO	NO	NO	Falta de infraestructura o servicio de agua	NA	NA	NA	NA	NA	NA	NA	NA	NA	NA	NA	NA	NA	NA	NA	NA	NA	NA	NA
12	Guerrero	002	Ahuacuotzingo	0182	Naranjastitlán	0985110	174739	1439	No conexa a carretera	De 11 a 20 km	No hay transporte	No hay transporte	No hay transporte	No hay transporte	Sin hablantes de lengua indígena	Sin hablantes de lengua indígena	Sin hablantes de lengua indígena	Sin hablantes de lengua indígena	Sin hablantes de lengua indígena	Sin hablantes de lengua indígena	Sin hablantes de lengua indígena	Agricultura	Cría y explotación de animales	NE	NO	NO	NO	NO	SI	Alcoholismo o drogadicción	NA	NA	NA	NA	NA	NA	NA	NA	NA	NA	NA	NA	NA	NA	NA	NA	NA	NA	NA
12	Guerrero	002	Ahuacuotzingo	0183	El Organal	0985108	174645	1540	No conexa a carretera	De 4 a 10 km	No hay transporte	No hay transporte	No hay transporte	No hay transporte	Sin hablantes de lengua indígena	Sin hablantes de lengua indígena	Sin hablantes de lengua indígena	Sin hablantes de lengua indígena	Sin hablantes de lengua indígena	Sin hablantes de lengua indígena	Sin hablantes de lengua indígena	Agricultura	Cría y explotación de animales	Agricultura	NO	NO	NO	NO	NO	Sin problema	NA	NA	NA	NA	NA	NA	NA	NA	NA	NA	NA	NA	NA	NA	NA	NA	NA	NA	NA
12	Guerrero	002	Ahuacuotzingo	0184	Ojo de Agua del Rincón	0985110	174622	1574	No conexa a carretera	De 4 a 10 km	No hay transporte	No hay transporte	No hay transporte	No hay transporte	Sin hablantes de lengua indígena	Sin hablantes de lengua indígena	Sin hablantes de lengua indígena	Sin hablantes de lengua indígena	Sin hablantes de lengua indígena	Sin hablantes de lengua indígena	Sin hablantes de lengua indígena	Agricultura	Agricultura	Agricultura	NO	NO	NO	NO	NO	Sin problema	NA	NA	NA	NA	NA	NA	NA	NA	NA	NA	NA	NA	NA	NA	NA	NA	NA	NA	NA
12	Guerrero	002	Ahuacuotzingo	0185	Rancho Escondido	0985059	174310	1533	No conexa a carretera	De 1 a 3 km	No hay transporte	No hay transporte	No hay transporte	No hay transporte	Con hablantes de lengua indígena	Náhuatl	SI	SI	SI	SI	SI	Agricultura	Agricultura	Agricultura	NO	NO	NO	NO	NO	Sin problema	NA	NA	NA	NA	NA	NA	NA	NA	NA	NA	NA	NA	NA	NA	NA	NA	NA	NA	NA
12	Guerrero	003	Ajuchitlán del Progreso	0002	El Aguaje	1002132	181144	0300	Pavimentada	Conexa a carretera	Camión de redilas o troca	Más de 1 y hasta 1.5 horas	De 1 a 5 salidas al día	De 35 a 39 pesos	Sin hablantes de lengua indígena	Sin hablantes de lengua indígena	Sin hablantes de lengua indígena	Sin hablantes de lengua indígena	Sin hablantes de lengua indígena	Sin hablantes de lengua indígena	Sin hablantes de lengua indígena	Agricultura	Cría y explotación de animales	NE	NO	NO	NO	NO	NO	Falta de infraestructura o servicio de agua	NO	Red de agua no disponible	NO	Red de drenaje no disponible	NO	NO	No hay recolección	SI	NO	SI	NO	SI	SI	SI	NO	NO	NO	NO	SI
12	Guerrero	003	Ajuchitlán del Progreso	0003	Las Anonitas	1003423	181221	0288	Terracería	Conexa a carretera	Micro, combi o camioneta	De 30 a 60 min	De 6 a 10 salidas al día	De 20 a 24 pesos	Sin hablantes de lengua indígena	Sin hablantes de lengua indígena	Sin hablantes de lengua indígena	Sin hablantes de lengua indígena	Sin hablantes de lengua indígena	Sin hablantes de lengua indígena	Sin hablantes de lengua indígena	Agricultura	Insuficientemente especificado del sector construcción	NE	SI	NO	NO	NO	SI	Falta de empleo o emigración	NO	Red de agua no disponible	NO	Red de drenaje no disponible	NO	NO	No hay recolección	SI	NO	NO	NO	SI	NO	NO	NO	NO	NO	NO	SI
12	Guerrero	003	Ajuchitlán del Progreso	0004	Ayavitle	1003010	181201	0271	Terracería	Conexa a carretera	Micro, combi o camioneta	De 10 a 14 min	De 11 a 20 salidas al día	De 10 a 14 pesos	Sin hablantes de lengua indígena	Sin hablantes de lengua indígena	Sin hablantes de lengua indígena	Sin hablantes de lengua indígena	Sin hablantes de lengua indígena	Sin hablantes de lengua indígena	Sin hablantes de lengua indígena	Agricultura	NE	NE	NO	NO	NO	NO	NO	Falta de equipamiento o servicios de salud	NO	Red de agua no disponible	SI	Disponible con desalojo a otro lugar	NO	NO	No hay recolección	NO	NO	NO	NO	NO	NO	NO	NO	NO	NO	SI	SI
12	Guerrero	003	Ajuchitlán del Progreso	0009	Cantón de Guerrero	1003231	181350	0263	Pavimentada	Conexa a carretera	Micro, combi o camioneta	De 25 a 29 min	De 21 a 30 salidas al día	De 20 a 24 pesos	Sin hablantes de lengua indígena	Sin hablantes de lengua indígena	Sin hablantes de lengua indígena	Sin hablantes de lengua indígena	Sin hablantes de lengua indígena	Sin hablantes de lengua indígena	Sin hablantes de lengua indígena	Agricultura	Cría y explotación de animales	NE	NO	NO	NO	NO	SI	Falta de empleo o emigración	NO	Red de agua no disponible	NO	Red de drenaje no disponible	NO	NO	No hay recolección	SI	SI	NO	NO	SI	NO	NO	NO	NO	NO	NO	SI
12	Guerrero	003	Ajuchitlán del Progreso	0011	El Carrizal	1004442	174830	1541	Terracería	Conexa a carretera	No hay transporte	No hay transporte	No hay transporte	No hay transporte	Con hablantes de lengua indígena	Tlapaneco	SI	NO	NO	NO	NO	Agricultura	Cría y explotación de animales	NE	NO	NO	NO	NO	NO	Falta de carretera o transporte	NA	NA	NA	NA	NA	NA	NA	NA	NA	NA	NA	NA	NA	NA	NA	NA	NA	NA	NA
12	Guerrero	003	Ajuchitlán del Progreso	0013	El Coco	1002822	180404	0360	Terracería	Conexa a carretera	Micro, combi o camioneta	De 30 a 60 min	De 1 a 5 salidas al día	De 25 a 29 pesos	Sin hablantes de lengua indígena	Sin hablantes de lengua indígena	Sin hablantes de lengua indígena	Sin hablantes de lengua indígena	Sin hablantes de lengua indígena	Sin hablantes de lengua indígena	Sin hablantes de lengua indígena	Agricultura	Cría y explotación de animales	NE	NO	NO	NO	NO	NO	Falta de infraestructura o servicio de agua	NA	NA	NA	NA	NA	NA	NA	NA	NA	NA	NA	NA	NA	NA	NA	NA	NA	NA	NA
12	Guerrero	003	Ajuchitlán del Progreso	0014	Colonia Hidalgo (Llano Grande)	1002535	181121	0318	Terracería	Conexa a carretera	Camión de redilas o troca	Más de 1 y hasta 1.5 horas	De 1 a 5 salidas al día	De 25 a 29 pesos	Sin hablantes de lengua indígena	Sin hablantes de lengua indígena	Sin hablantes de lengua indígena	Sin hablantes de lengua indígena	Sin hablantes de lengua indígena	Sin hablantes de lengua indígena	Sin hablantes de lengua indígena	Agricultura	Cría y explotación de animales	NE	NO	NO	NO	NO	NO	Falta de infraestructura o servicio de agua	NO	Red de agua no disponible	NO	Red de drenaje no disponible	NO	NO	No hay recolección	SI	NO	NO	NO	SI	NO	NO	NO	NO	NO	NO	NO
12	Guerrero	003	Ajuchitlán del Progreso	0015	La Comunidad	1003123	180720	0303	Pavimentada	Conexa a carretera	Micro, combi o camioneta	DE 15 A 19 MIN	De 11 a 20 salidas al día	De 10 a 14 pesos	Sin hablantes de lengua indígena	Sin hablantes de lengua indígena	Sin hablantes de lengua indígena	Sin hablantes de lengua indígena	Sin hablantes de lengua indígena	Sin hablantes de lengua indígena	Sin hablantes de lengua indígena	Agricultura	Pesca	Cría y explotación de animales	NO	NO	NO	NO	SI	Falta de empleo o emigración	NO	Red de agua no disponible	NO	Red de drenaje no disponible	NO	SI	Queman la basura	SI	NO	NO	NO	NO	NO	NO	NO	NO	NO	NO	SI
12	Guerrero	003	Ajuchitlán del Progreso	0016	Corral Falso	1003336	181441	0262	NDAI	NDAI	NDAI	NDAI	NDAI	NDAI	NDAI	NDAI	NDAI	NDAI	NDAI	NDAI	NDAI	NDAI	NDAI	NDAI	NDAI	NDAI	NDAI	NDAI	NDAI	No especificado	NDAI	NDAI	NDAI	NDAI	NDAI	NDAI	NDAI	NDAI	NDAI	NDAI	NDAI	NDAI	NDAI	NDAI	NDAI	NDAI	NDAI	NDAI	NDAI
12	Guerrero	003	Ajuchitlán del Progreso	0017	Changata	1003507	181623	0260	Pavimentada	Conexa a carretera	Micro, combi o camioneta	De 20 a 24 min	De 31 a 60 salidas al día	De 15 a 19 pesos	Sin hablantes de lengua indígena	Sin hablantes de lengua indígena	Sin hablantes de lengua indígena	Sin hablantes de lengua indígena	Sin hablantes de lengua indígena	Sin hablantes de lengua indígena	Sin hablantes de lengua indígena	Agricultura	NE	NE	NO	NO	NO	SI	SI	Falta de infraestructura o servicio de agua	NO	Red de agua no disponible	NO	Red de drenaje no disponible	NO	NO	No hay recolección	SI	SI	NO	SI	SI	NO	SI	NO	NO	NO	NO	SI
12	Guerrero	003	Ajuchitlán del Progreso	0019	El Espíritu Santo	1003944	180000	0614	Terracería	Conexa a carretera	Camión de redilas o troca	Tiempo de traslado NE	Frecuencia NE	Costo NE	Sin hablantes de lengua indígena	Sin hablantes de lengua indígena	Sin hablantes de lengua indígena	Sin hablantes de lengua indígena	Sin hablantes de lengua indígena	Sin hablantes de lengua indígena	Sin hablantes de lengua indígena	Agricultura	Cría y explotación de animales	NE	NO	NO	NO	NO	NO	Falta de energía eléctrica	NA	NA	NA	NA	NA	NA	NA	NA	NA	NA	NA	NA	NA	NA	NA	NA	NA	NA	NA
12	Guerrero	003	Ajuchitlán del Progreso	0020	Los Fresnos de Puerto Rico	1003924	173934	1720	Terracería	Conexa a carretera	No hay transporte	No hay transporte	No hay transporte	No hay transporte	Con hablantes de lengua indígena	Náhuatl	SI	NE	NE	NE	NE	Agricultura	NE	NE	SI	NO	SI	NO	SI	Alcoholismo o drogadicción	NA	NA	NA	NA	NA	NA	NA	NA	NA	NA	NA	NA	NA	NA	NA	NA	NA	NA	NA
12	Guerrero	003	Ajuchitlán del Progreso	0023	Guayatenco	1002710	181020	0280	Terracería	Conexa a carretera	Camión de redilas o troca	De 30 a 60 min	De 1 a 5 salidas al día	De 20 a 24 pesos	Sin hablantes de lengua indígena	Sin hablantes de lengua indígena	Sin hablantes de lengua indígena	Sin hablantes de lengua indígena	Sin hablantes de lengua indígena	Sin hablantes de lengua indígena	Sin hablantes de lengua indígena	Agricultura	NE	NE	NO	NO	NO	NO	NO	Falta de empleo o emigración	NO	Red de agua no disponible	NO	Red de drenaje no disponible	NO	NO	No hay recolección	SI	NO	NO	NO	NO	NO	NO	NO	NO	NO	NO	SI
12	Guerrero	003	Ajuchitlán del Progreso	0024	Ixcapuzalco	1002254	181141	0300	Pavimentada	Conexa a carretera	Camión de redilas o troca	De 30 a 60 min	De 1 a 5 salidas al día	De 25 a 29 pesos	Sin hablantes de lengua indígena	Sin hablantes de lengua indígena	Sin hablantes de lengua indígena	Sin hablantes de lengua indígena	Sin hablantes de lengua indígena	Sin hablantes de lengua indígena	Sin hablantes de lengua indígena	Cría y explotación de animales	Agricultura	NE	NO	NO	NO	NO	NO	Falta de drenaje y alcantarillado	NE	Disponibilidad de red de agua NE	NE	Disponibilidad NE	NE	NE	Recolección y limpieza NE	NE	NE	NE	NE	NE	NE	NE	NE	NE	NE	NE	NE
12	Guerrero	003	Ajuchitlán del Progreso	0025	Las Juntas (Las Juntas del Río Chiquito)	1002230	181107	0300	Terracería	Conexa a carretera	Camión de redilas o troca	Más de 1.5 y hasta 2 horas	De 1 a 5 salidas al día	De 40 a 49 pesos	Sin hablantes de lengua indígena	Sin hablantes de lengua indígena	Sin hablantes de lengua indígena	Sin hablantes de lengua indígena	Sin hablantes de lengua indígena	Sin hablantes de lengua indígena	Sin hablantes de lengua indígena	Agricultura	Cría y explotación de animales	NE	NO	NO	NO	NO	NO	Falta de otros servicios o equipamiento	NO	Red de agua no disponible	NO	Red de drenaje no disponible	NO	NO	No hay recolección	SI	NO	NO	NO	SI	NO	NO	NO	NO	NO	NO	NO
12	Guerrero	003	Ajuchitlán del Progreso	0026	La Laja	1002855	180559	0318	Terracería	Conexa a carretera	Micro, combi o camioneta	De 20 a 24 min	De 11 a 20 salidas al día	De 10 a 14 pesos	Sin hablantes de lengua indígena	Sin hablantes de lengua indígena	Sin hablantes de lengua indígena	Sin hablantes de lengua indígena	Sin hablantes de lengua indígena	Sin hablantes de lengua indígena	Sin hablantes de lengua indígena	Agricultura	NE	NE	NO	NO	NO	NO	NO	Falta de equipamiento o servicios para la educación	SI	Disponible con cobro	NO	Red de drenaje no disponible	SI	SI	Queman la basura	SI	NO	NO	SI	SI	NO	NO	NO	NO	NO	NO	SI
12	Guerrero	003	Ajuchitlán del Progreso	0029	El Limón	1002956	175439	0579	Terracería	Conexa a carretera	Camión de redilas o troca	Más de 4 horas	Sin salidas diarias	250 pesos y más	Sin hablantes de lengua indígena	Sin hablantes de lengua indígena	Sin hablantes de lengua indígena	Sin hablantes de lengua indígena	Sin hablantes de lengua indígena	Sin hablantes de lengua indígena	Sin hablantes de lengua indígena	Agricultura	Cría y explotación de animales	NE	NO	NO	NO	NO	NO	Falta de empleo o emigración	NA	NA	NA	NA	NA	NA	NA	NA	NA	NA	NA	NA	NA	NA	NA	NA	NA	NA	NA
12	Guerrero	003	Ajuchitlán del Progreso	0031	El Llano Grande	1003336	175835	1342	Terracería	Conexa a carretera	Camión de redilas o troca	Más de 1.5 y hasta 2 horas	Sin salidas diarias	De 200 a 249 pesos	Sin hablantes de lengua indígena	Sin hablantes de lengua indígena	Sin hablantes de lengua indígena	Sin hablantes de lengua indígena	Sin hablantes de lengua indígena	Sin hablantes de lengua indígena	Sin hablantes de lengua indígena	Agricultura	NE	NE	NO	NO	NO	NO	NO	Falta de empleo o emigración	NA	NA	NA	NA	NA	NA	NA	NA	NA	NA	NA	NA	NA	NA	NA	NA	NA	NA	NA
12	Guerrero	003	Ajuchitlán del Progreso	0033	Nanche Colorado (El Nanche)	1002003	181316	0325	Pavimentada	Conexa a carretera	No hay transporte	No hay transporte	No hay transporte	No hay transporte	Sin hablantes de lengua indígena	Sin hablantes de lengua indígena	Sin hablantes de lengua indígena	Sin hablantes de lengua indígena	Sin hablantes de lengua indígena	Sin hablantes de lengua indígena	Sin hablantes de lengua indígena	Agricultura	Cría y explotación de animales	NE	NO	NO	NO	NO	NE	Falta de equipamiento o servicios de salud	NE	Disponibilidad de red de agua NE	NE	Disponibilidad NE	NE	NE	Recolección y limpieza NE	NE	NE	NE	NE	NE	NE	NE	NE	NE	NE	NE	NE
12	Guerrero	003	Ajuchitlán del Progreso	0035	Pizotla	1004114	175143	0828	Terracería	Conexa a carretera	No hay transporte	No hay transporte	No hay transporte	No hay transporte	Sin hablantes de lengua indígena	Sin hablantes de lengua indígena	Sin hablantes de lengua indígena	Sin hablantes de lengua indígena	Sin hablantes de lengua indígena	Sin hablantes de lengua indígena	Sin hablantes de lengua indígena	Agricultura	Cría y explotación de animales	NE	NO	NO	NO	NO	NO	Falta de carretera o transporte	NA	NA	NA	NA	NA	NA	NA	NA	NA	NA	NA	NA	NA	NA	NA	NA	NA	NA	NA
12	Guerrero	003	Ajuchitlán del Progreso	0036	Puerto Grande	1003421	175410	1360	Terracería	Conexa a carretera	Camión de redilas o troca	Más de 2 y hasta 3 horas	Sin salidas diarias	De 75 a 99 pesos	Sin hablantes de lengua indígena	Sin hablantes de lengua indígena	Sin hablantes de lengua indígena	Sin hablantes de lengua indígena	Sin hablantes de lengua indígena	Sin hablantes de lengua indígena	Sin hablantes de lengua indígena	Agricultura	Cría y explotación de animales	NE	SI	NO	NO	NO	NO	Falta de energía eléctrica	NA	NA	NA	NA	NA	NA	NA	NA	NA	NA	NA	NA	NA	NA	NA	NA	NA	NA	NA
12	Guerrero	003	Ajuchitlán del Progreso	0037	El Reparo	1003020	180716	0290	Terracería	Conexa a carretera	Micro, combi o camioneta	De 30 a 60 min	De 1 a 5 salidas al día	De 15 a 19 pesos	Sin hablantes de lengua indígena	Sin hablantes de lengua indígena	Sin hablantes de lengua indígena	Sin hablantes de lengua indígena	Sin hablantes de lengua indígena	Sin hablantes de lengua indígena	Sin hablantes de lengua indígena	Agricultura	NE	NE	NO	NO	NO	NO	SI	Pobreza o marginación	NO	Red de agua no disponible	NO	Red de drenaje no disponible	NO	SI	Queman la basura	SI	NO	NO	NO	SI	SI	NO	NO	NO	NO	NO	SI
12	Guerrero	003	Ajuchitlán del Progreso	0038	San Antonio de los Libres	1003504	181042	0320	Terracería	Conexa a carretera	Micro, combi o camioneta	De 30 a 60 min	De 11 a 20 salidas al día	De 15 a 19 pesos	Sin hablantes de lengua indígena	Sin hablantes de lengua indígena	Sin hablantes de lengua indígena	Sin hablantes de lengua indígena	Sin hablantes de lengua indígena	Sin hablantes de lengua indígena	Sin hablantes de lengua indígena	Agricultura	NE	NE	NO	NO	NO	NO	NO	Falta de infraestructura o servicio de agua	NO	Red de agua no disponible	NO	Red de drenaje no disponible	NO	NO	No hay recolección	SI	NO	NO	NO	SI	NO	NO	NO	NO	NO	NO	SI
12	Guerrero	003	Ajuchitlán del Progreso	0039	San Bartolo	1002301	181320	0297	No conexa a carretera	De 1 a 3 km	Camión de redilas o troca	Más de 1 y hasta 1.5 horas	De 1 a 5 salidas al día	De 30 a 34 pesos	Sin hablantes de lengua indígena	Sin hablantes de lengua indígena	Sin hablantes de lengua indígena	Sin hablantes de lengua indígena	Sin hablantes de lengua indígena	Sin hablantes de lengua indígena	Sin hablantes de lengua indígena	Cría y explotación de animales	Agricultura	NE	SI	NO	NO	NO	NO	Delincuencia o inseguridad	NO	Red de agua no disponible	NO	Red de drenaje no disponible	NO	NO	No hay recolección	SI	NO	NO	NO	SI	SI	SI	NO	NO	NO	NO	SI
12	Guerrero	003	Ajuchitlán del Progreso	0040	San Cristóbal	1002911	181009	0280	Terracería	Conexa a carretera	Camión de redilas o troca	DE 15 A 19 MIN	De 6 a 10 salidas al día	De 10 a 14 pesos	Sin hablantes de lengua indígena	Sin hablantes de lengua indígena	Sin hablantes de lengua indígena	Sin hablantes de lengua indígena	Sin hablantes de lengua indígena	Sin hablantes de lengua indígena	Sin hablantes de lengua indígena	Agricultura	Cría y explotación de animales	Pesca	NO	NO	NO	NO	SI	Falta de empleo o emigración	NO	Red de agua no disponible	NO	Red de drenaje no disponible	NO	NO	No hay recolección	SI	SI	NO	SI	SI	NO	SI	NO	NO	NO	NO	SI
12	Guerrero	003	Ajuchitlán del Progreso	0041	San Gabriel	1002842	181005	0276	Pavimentada	Conexa a carretera	Micro, combi o camioneta	De 30 a 60 min	De 11 a 20 salidas al día	De 7 a 9 pesos	Sin hablantes de lengua indígena	Sin hablantes de lengua indígena	Sin hablantes de lengua indígena	Sin hablantes de lengua indígena	Sin hablantes de lengua indígena	Sin hablantes de lengua indígena	Sin hablantes de lengua indígena	Agricultura	Cría y explotación de animales	NE	NO	NO	NO	NO	NO	Falta de empleo o emigración	NA	NA	NA	NA	NA	NA	NA	NA	NA	NA	NA	NA	NA	NA	NA	NA	NA	NA	NA
12	Guerrero	003	Ajuchitlán del Progreso	0042	San Jerónimo el Grande	1003006	181243	0270	Pavimentada	Conexa a carretera	Micro, combi o camioneta	Tiempo de traslado NE	Frecuencia NE	De 20 a 24 pesos	Sin hablantes de lengua indígena	Sin hablantes de lengua indígena	Sin hablantes de lengua indígena	Sin hablantes de lengua indígena	Sin hablantes de lengua indígena	Sin hablantes de lengua indígena	Sin hablantes de lengua indígena	Agricultura	Cría y explotación de animales	NE	NO	NO	NO	NO	SI	Falta de empleo o emigración	NO	Red de agua no disponible	SI	Disponible con desalojo a un cuerpo de agua	NO	SI	Depositan la basura a cielo abierto	SI	SI	SI	NO	SI	NO	SI	NO	NO	NO	NO	SI
12	Guerrero	003	Ajuchitlán del Progreso	0043	San Jerónimo Santa Fe	1004030	180509	0480	Terracería	Conexa a carretera	Camión de redilas o troca	Tiempo de traslado NE	Frecuencia NE	Costo NE	Sin hablantes de lengua indígena	Sin hablantes de lengua indígena	Sin hablantes de lengua indígena	Sin hablantes de lengua indígena	Sin hablantes de lengua indígena	Sin hablantes de lengua indígena	Sin hablantes de lengua indígena	Agricultura	NE	NE	NO	NO	NO	NO	NO	Falta de carretera o transporte	NE	Disponibilidad de red de agua NE	NE	Disponibilidad NE	NE	NE	Recolección y limpieza NE	NE	NE	NE	NE	NE	NE	NE	NE	NE	NE	NE	NE
12	Guerrero	003	Ajuchitlán del Progreso	0045	San Lorenzo	1003643	181620	0250	Pavimentada	Conexa a carretera	Micro, combi o camioneta	De 30 a 60 min	Frecuencia NE	De 15 a 19 pesos	Sin hablantes de lengua indígena	Sin hablantes de lengua indígena	Sin hablantes de lengua indígena	Sin hablantes de lengua indígena	Sin hablantes de lengua indígena	Sin hablantes de lengua indígena	Sin hablantes de lengua indígena	Agricultura	Fabricación de productos a base de minerales no metálicos	NE	SI	NO	NO	SI	SI	Falta de drenaje y alcantarillado	NO	Red de agua no disponible	NO	Red de drenaje no disponible	NE	NE	Recolección y limpieza NE	SI	NO	NO	NO	SI	NO	NO	NO	NO	NO	NO	SI
12	Guerrero	003	Ajuchitlán del Progreso	0046	San Marcos	1002726	180932	0279	Pavimentada	Conexa a carretera	Micro, combi o camioneta	DE 15 A 19 MIN	De 11 a 20 salidas al día	De 3 a 6 pesos	Sin hablantes de lengua indígena	Sin hablantes de lengua indígena	Sin hablantes de lengua indígena	Sin hablantes de lengua indígena	Sin hablantes de lengua indígena	Sin hablantes de lengua indígena	Sin hablantes de lengua indígena	Agricultura	NE	NE	SI	NO	NO	NO	NO	Falta de infraestructura o servicio de agua	NO	Red de agua no disponible	NO	Red de drenaje no disponible	NE	NE	Recolección y limpieza NE	SI	NO	SI	NO	NO	NO	NO	NO	NO	NO	NO	SI
12	Guerrero	003	Ajuchitlán del Progreso	0047	San Mateo	1003055	181153	0270	Terracería	Conexa a carretera	Micro, combi o camioneta	De 20 a 24 min	De 11 a 20 salidas al día	De 10 a 14 pesos	Sin hablantes de lengua indígena	Sin hablantes de lengua indígena	Sin hablantes de lengua indígena	Sin hablantes de lengua indígena	Sin hablantes de lengua indígena	Sin hablantes de lengua indígena	Sin hablantes de lengua indígena	Agricultura	NE	NE	NO	NO	NO	NO	NO	Falta de drenaje y alcantarillado	SI	Disponible con cobro	NO	Red de drenaje no disponible	NO	NO	No hay recolección	NO	NO	SI	NO	NO	NO	NO	NO	NO	NO	NO	SI
12	Guerrero	003	Ajuchitlán del Progreso	0048	San Pablo Oriente	1002155	181027	0297	Terracería	Conexa a carretera	Camión de redilas o troca	Más de 1 y hasta 1.5 horas	De 1 a 5 salidas al día	De 25 a 29 pesos	Sin hablantes de lengua indígena	Sin hablantes de lengua indígena	Sin hablantes de lengua indígena	Sin hablantes de lengua indígena	Sin hablantes de lengua indígena	Sin hablantes de lengua indígena	Sin hablantes de lengua indígena	Cría y explotación de animales	Agricultura	NE	NO	NO	NO	NO	NO	Falta de drenaje y alcantarillado	NO	Red de agua no disponible	NO	Red de drenaje no disponible	NO	NO	No hay recolección	SI	NO	NO	NO	SI	SI	NO	NO	NO	NO	NO	SI
12	Guerrero	003	Ajuchitlán del Progreso	0049	San Pablo Sur	1002823	180136	0445	Terracería	Conexa a carretera	Micro, combi o camioneta	De 30 a 60 min	De 1 a 5 salidas al día	De 30 a 34 pesos	Sin hablantes de lengua indígena	Sin hablantes de lengua indígena	Sin hablantes de lengua indígena	Sin hablantes de lengua indígena	Sin hablantes de lengua indígena	Sin hablantes de lengua indígena	Sin hablantes de lengua indígena	Agricultura	Cría y explotación de animales	NE	NO	NO	NO	NO	SI	Falta de equipamiento o servicios de salud	NE	Disponibilidad de red de agua NE	NE	Disponibilidad NE	NE	NE	Recolección y limpieza NE	NE	NE	NE	NE	NE	NE	NE	NE	NE	NE	NE	NE
12	Guerrero	003	Ajuchitlán del Progreso	0050	San Pedro y las Garzas	1003114	180524	0317	Terracería	Conexa a carretera	Micro, combi o camioneta	De 25 a 29 min	De 11 a 20 salidas al día	De 15 a 19 pesos	Sin hablantes de lengua indígena	Sin hablantes de lengua indígena	Sin hablantes de lengua indígena	Sin hablantes de lengua indígena	Sin hablantes de lengua indígena	Sin hablantes de lengua indígena	Sin hablantes de lengua indígena	Agricultura	Pesca	NE	NO	NO	NO	NO	NO	Falta de empleo o emigración	SI	Disponible con cobro	SI	Disponible con desalojo a otro lugar	NO	NO	No hay recolección	SI	NO	NO	NO	NO	NO	NO	NO	NO	NO	NO	SI
12	Guerrero	003	Ajuchitlán del Progreso	0051	San Sebastián (Las Lomas)	1002823	180546	0324	Terracería	Conexa a carretera	Micro, combi o camioneta	De 30 a 60 min	De 1 a 5 salidas al día	De 15 a 19 pesos	Sin hablantes de lengua indígena	Sin hablantes de lengua indígena	Sin hablantes de lengua indígena	Sin hablantes de lengua indígena	Sin hablantes de lengua indígena	Sin hablantes de lengua indígena	Sin hablantes de lengua indígena	Agricultura	Cría y explotación de animales	NE	NO	NO	NO	NO	NO	Falta de carretera o transporte	NA	NA	NA	NA	NA	NA	NA	NA	NA	NA	NA	NA	NA	NA	NA	NA	NA	NA	NA
12	Guerrero	003	Ajuchitlán del Progreso	0052	Santa Ana del Águila	1002349	181227	0297	Pavimentada	Conexa a carretera	Micro, combi o camioneta	De 30 a 60 min	De 11 a 20 salidas al día	De 25 a 29 pesos	Sin hablantes de lengua indígena	Sin hablantes de lengua indígena	Sin hablantes de lengua indígena	Sin hablantes de lengua indígena	Sin hablantes de lengua indígena	Sin hablantes de lengua indígena	Sin hablantes de lengua indígena	Agricultura	Cría y explotación de animales	NE	NO	NO	NO	NO	NO	Pobreza o marginación	SI	Disponible con cobro	NO	Red de drenaje no disponible	NO	SI	Desalojan la basura a otro lugar	SI	NO	SI	NO	SI	SI	NO	NO	NO	NO	NO	SI
12	Guerrero	003	Ajuchitlán del Progreso	0053	Santa Rosa Primera (Santa Rosa Oriente)	1002330	181229	0297	Pavimentada	Conexa a carretera	Camión de redilas o troca	De 30 a 60 min	De 1 a 5 salidas al día	De 25 a 29 pesos	Sin hablantes de lengua indígena	Sin hablantes de lengua indígena	Sin hablantes de lengua indígena	Sin hablantes de lengua indígena	Sin hablantes de lengua indígena	Sin hablantes de lengua indígena	Sin hablantes de lengua indígena	Agricultura	Trabajos de albañilería de instalaciones hidrosanitarias y eléctricas y de trabajos en exteriores	NE	NO	NO	NO	NO	NO	Falta de infraestructura o servicio de agua	NO	Red de agua no disponible	NO	Red de drenaje no disponible	SI	SI	Queman la basura	SI	NO	SI	NO	SI	NO	NO	NO	NO	NO	NO	NO
12	Guerrero	003	Ajuchitlán del Progreso	0054	Santa Rosa de Lima	1003257	180950	0300	Terracería	Conexa a carretera	Micro, combi o camioneta	De 30 a 60 min	De 6 a 10 salidas al día	De 10 a 14 pesos	Sin hablantes de lengua indígena	Sin hablantes de lengua indígena	Sin hablantes de lengua indígena	Sin hablantes de lengua indígena	Sin hablantes de lengua indígena	Sin hablantes de lengua indígena	Sin hablantes de lengua indígena	Agricultura	NE	NE	NO	NO	NO	NO	NO	Falta de infraestructura o servicio de agua	NO	Red de agua no disponible	NO	Red de drenaje no disponible	NO	NO	No hay recolección	NO	NO	NO	NO	SI	NO	NO	NO	NO	NO	NO	SI
12	Guerrero	003	Ajuchitlán del Progreso	0055	El Tepehuaje	1003620	180335	0660	Terracería	Conexa a carretera	Micro, combi o camioneta	Más de 1.5 y hasta 2 horas	Sin salidas diarias	De 50 a 59 pesos	Sin hablantes de lengua indígena	Sin hablantes de lengua indígena	Sin hablantes de lengua indígena	Sin hablantes de lengua indígena	Sin hablantes de lengua indígena	Sin hablantes de lengua indígena	Sin hablantes de lengua indígena	Agricultura	NE	NE	NO	NO	NO	NO	NO	Pobreza o marginación	NA	NA	NA	NA	NA	NA	NA	NA	NA	NA	NA	NA	NA	NA	NA	NA	NA	NA	NA
12	Guerrero	003	Ajuchitlán del Progreso	0057	La Trinidad	1004623	174022	1893	Terracería	Conexa a carretera	No hay transporte	No hay transporte	No hay transporte	No hay transporte	Sin hablantes de lengua indígena	Sin hablantes de lengua indígena	Sin hablantes de lengua indígena	Sin hablantes de lengua indígena	Sin hablantes de lengua indígena	Sin hablantes de lengua indígena	Sin hablantes de lengua indígena	Agricultura	Industria de la madera	NE	SI	NO	NO	NO	NO	Irregularidad o disputa relacionada con la tenencia de la tierra	NA	NA	NA	NA	NA	NA	NA	NA	NA	NA	NA	NA	NA	NA	NA	NA	NA	NA	NA
12	Guerrero	003	Ajuchitlán del Progreso	0058	Villa Nicolás Bravo	1003258	181257	0270	Pavimentada	Conexa a carretera	Micro, combi o camioneta	De 10 a 14 min	Frecuencia NE	De 10 a 14 pesos	Con hablantes de lengua indígena	Náhuatl	SI	NE	NE	NE	NE	Agricultura	NE	NE	NO	NO	NO	NO	NO	Falta de drenaje y alcantarillado	SI	Disponible con cobro	SI	Disponible con desalojo a un cuerpo de agua	NO	SI	Desalojan la basura a otro lugar	SI	SI	NO	SI	SI	SI	SI	NO	NO	NO	SI	SI
12	Guerrero	003	Ajuchitlán del Progreso	0059	Zacahuaje	1003144	181157	0270	Terracería	Conexa a carretera	Micro, combi o camioneta	DE 15 A 19 MIN	De 6 a 10 salidas al día	De 10 a 14 pesos	Sin hablantes de lengua indígena	Sin hablantes de lengua indígena	Sin hablantes de lengua indígena	Sin hablantes de lengua indígena	Sin hablantes de lengua indígena	Sin hablantes de lengua indígena	Sin hablantes de lengua indígena	Agricultura	NE	NE	NO	NO	NO	NO	NO	Falta de otros servicios o equipamiento	NO	Red de agua no disponible	SI	Disponible con desalojo a un cuerpo de agua	NO	NO	No hay recolección	SI	NO	NO	NO	NO	NO	NO	NO	NO	NO	NO	SI
12	Guerrero	003	Ajuchitlán del Progreso	0061	Colonia Francisco Villa (Cuadrilla Seca)	1003852	180131	0612	Terracería	Conexa a carretera	No hay transporte	No hay transporte	No hay transporte	No hay transporte	Sin hablantes de lengua indígena	Sin hablantes de lengua indígena	Sin hablantes de lengua indígena	Sin hablantes de lengua indígena	Sin hablantes de lengua indígena	Sin hablantes de lengua indígena	Sin hablantes de lengua indígena	Agricultura	NE	NE	NO	NO	NO	NO	NO	Falta de empleo o emigración	NA	NA	NA	NA	NA	NA	NA	NA	NA	NA	NA	NA	NA	NA	NA	NA	NA	NA	NA
12	Guerrero	003	Ajuchitlán del Progreso	0062	El Tule	1003920	180205	0576	Terracería	Conexa a carretera	No hay transporte	No hay transporte	No hay transporte	No hay transporte	Sin hablantes de lengua indígena	Sin hablantes de lengua indígena	Sin hablantes de lengua indígena	Sin hablantes de lengua indígena	Sin hablantes de lengua indígena	Sin hablantes de lengua indígena	Sin hablantes de lengua indígena	Agricultura	Cría y explotación de animales	NE	NO	NO	NO	NO	NO	Pobreza o marginación	NA	NA	NA	NA	NA	NA	NA	NA	NA	NA	NA	NA	NA	NA	NA	NA	NA	NA	NA
12	Guerrero	003	Ajuchitlán del Progreso	0063	El Nanche	1004012	180030	0561	Terracería	Conexa a carretera	Camión de redilas o troca	Más de 3 y hasta 4 horas	Sin salidas diarias	De 200 a 249 pesos	Sin hablantes de lengua indígena	Sin hablantes de lengua indígena	Sin hablantes de lengua indígena	Sin hablantes de lengua indígena	Sin hablantes de lengua indígena	Sin hablantes de lengua indígena	Sin hablantes de lengua indígena	Agricultura	Cría y explotación de animales	NE	NO	NO	NO	NO	NO	Falta de empleo o emigración	NA	NA	NA	NA	NA	NA	NA	NA	NA	NA	NA	NA	NA	NA	NA	NA	NA	NA	NA
12	Guerrero	003	Ajuchitlán del Progreso	0064	Paso Real Santa Fe	1003952	180654	0483	Terracería	Conexa a carretera	No hay transporte	No hay transporte	No hay transporte	No hay transporte	Sin hablantes de lengua indígena	Sin hablantes de lengua indígena	Sin hablantes de lengua indígena	Sin hablantes de lengua indígena	Sin hablantes de lengua indígena	Sin hablantes de lengua indígena	Sin hablantes de lengua indígena	Agricultura	Cría y explotación de animales	NE	NO	NO	NO	NO	NO	Falta de empleo o emigración	NA	NA	NA	NA	NA	NA	NA	NA	NA	NA	NA	NA	NA	NA	NA	NA	NA	NA	NA
12	Guerrero	003	Ajuchitlán del Progreso	0065	La Caña Santa Fe	1003908	180437	0500	Terracería	Conexa a carretera	Disponibilidad de transporte NE	Disponibilidad de transporte NE	Disponibilidad de transporte NE	Disponibilidad de transporte NE	Sin hablantes de lengua indígena	Sin hablantes de lengua indígena	Sin hablantes de lengua indígena	Sin hablantes de lengua indígena	Sin hablantes de lengua indígena	Sin hablantes de lengua indígena	Sin hablantes de lengua indígena	Agricultura	NE	NE	NO	NO	NO	NO	NO	Pobreza o marginación	NA	NA	NA	NA	NA	NA	NA	NA	NA	NA	NA	NA	NA	NA	NA	NA	NA	NA	NA
12	Guerrero	003	Ajuchitlán del Progreso	0066	El Coyol	1003413	180341	0539	Terracería	Conexa a carretera	No hay transporte	No hay transporte	No hay transporte	No hay transporte	Sin hablantes de lengua indígena	Sin hablantes de lengua indígena	Sin hablantes de lengua indígena	Sin hablantes de lengua indígena	Sin hablantes de lengua indígena	Sin hablantes de lengua indígena	Sin hablantes de lengua indígena	Agricultura	NE	NE	NO	NO	NO	NO	NO	Falta de infraestructura o servicio de agua	NA	NA	NA	NA	NA	NA	NA	NA	NA	NA	NA	NA	NA	NA	NA	NA	NA	NA	NA
12	Guerrero	003	Ajuchitlán del Progreso	0067	Las Mesas	1003616	180209	0921	Terracería	Conexa a carretera	No hay transporte	No hay transporte	No hay transporte	No hay transporte	Sin hablantes de lengua indígena	Sin hablantes de lengua indígena	Sin hablantes de lengua indígena	Sin hablantes de lengua indígena	Sin hablantes de lengua indígena	Sin hablantes de lengua indígena	Sin hablantes de lengua indígena	Agricultura	NE	NE	NO	NO	NO	NO	NO	Falta de empleo o emigración	NA	NA	NA	NA	NA	NA	NA	NA	NA	NA	NA	NA	NA	NA	NA	NA	NA	NA	NA
12	Guerrero	003	Ajuchitlán del Progreso	0071	Las Piñas	1003206	180123	0464	Terracería	Conexa a carretera	Micro, combi o camioneta	Más de 1 y hasta 1.5 horas	Sin salidas diarias	De 30 a 34 pesos	Sin hablantes de lengua indígena	Sin hablantes de lengua indígena	Sin hablantes de lengua indígena	Sin hablantes de lengua indígena	Sin hablantes de lengua indígena	Sin hablantes de lengua indígena	Sin hablantes de lengua indígena	Agricultura	Cría y explotación de animales	NE	NO	NO	NO	NO	NO	Falta de empleo o emigración	NA	NA	NA	NA	NA	NA	NA	NA	NA	NA	NA	NA	NA	NA	NA	NA	NA	NA	NA
12	Guerrero	003	Ajuchitlán del Progreso	0072	Pinzán Morado	1003324	180300	0583	Terracería	Conexa a carretera	No hay transporte	No hay transporte	No hay transporte	No hay transporte	Sin hablantes de lengua indígena	Sin hablantes de lengua indígena	Sin hablantes de lengua indígena	Sin hablantes de lengua indígena	Sin hablantes de lengua indígena	Sin hablantes de lengua indígena	Sin hablantes de lengua indígena	Agricultura	Cría y explotación de animales	NE	NO	NO	NO	NO	NO	Falta de empleo o emigración	NA	NA	NA	NA	NA	NA	NA	NA	NA	NA	NA	NA	NA	NA	NA	NA	NA	NA	NA
12	Guerrero	003	Ajuchitlán del Progreso	0073	Puerto del Coco	1002747	180343	0360	Terracería	Conexa a carretera	Micro, combi o camioneta	De 30 a 60 min	De 1 a 5 salidas al día	De 25 a 29 pesos	Sin hablantes de lengua indígena	Sin hablantes de lengua indígena	Sin hablantes de lengua indígena	Sin hablantes de lengua indígena	Sin hablantes de lengua indígena	Sin hablantes de lengua indígena	Sin hablantes de lengua indígena	Agricultura	Cría y explotación de animales	NE	NO	SI	NO	NO	NO	Falta de infraestructura o servicio de agua	NO	Red de agua no disponible	NO	Red de drenaje no disponible	SI	SI	Destino NE	SI	SI	NO	NO	NO	NO	NO	NO	NO	NO	NO	SI
12	Guerrero	003	Ajuchitlán del Progreso	0074	El Gachupín	1003123	180401	0394	NE	Conexión a carretera NE	Disponibilidad de transporte NE	Disponibilidad de transporte NE	Disponibilidad de transporte NE	Disponibilidad de transporte NE	Sin hablantes de lengua indígena	Sin hablantes de lengua indígena	Sin hablantes de lengua indígena	Sin hablantes de lengua indígena	Sin hablantes de lengua indígena	Sin hablantes de lengua indígena	Sin hablantes de lengua indígena	Agricultura	NE	NE	NO	NO	NO	NO	NO	Pobreza o marginación	NA	NA	NA	NA	NA	NA	NA	NA	NA	NA	NA	NA	NA	NA	NA	NA	NA	NA	NA
12	Guerrero	003	Ajuchitlán del Progreso	0078	El Salto	1003704	175558	1049	Terracería	Conexa a carretera	No hay transporte	No hay transporte	No hay transporte	No hay transporte	Sin hablantes de lengua indígena	Sin hablantes de lengua indígena	Sin hablantes de lengua indígena	Sin hablantes de lengua indígena	Sin hablantes de lengua indígena	Sin hablantes de lengua indígena	Sin hablantes de lengua indígena	Agricultura	NE	NE	NO	NO	NO	NO	NO	Falta de equipamiento o servicios para la educación	NA	NA	NA	NA	NA	NA	NA	NA	NA	NA	NA	NA	NA	NA	NA	NA	NA	NA	NA
12	Guerrero	003	Ajuchitlán del Progreso	0080	El Naranjo	1003726	175717	1023	Terracería	Conexa a carretera	Disponibilidad de transporte NE	Disponibilidad de transporte NE	Disponibilidad de transporte NE	Disponibilidad de transporte NE	Sin hablantes de lengua indígena	Sin hablantes de lengua indígena	Sin hablantes de lengua indígena	Sin hablantes de lengua indígena	Sin hablantes de lengua indígena	Sin hablantes de lengua indígena	Sin hablantes de lengua indígena	Agricultura	NE	NE	NE	NE	NE	NE	NE	Pobreza o marginación	NA	NA	NA	NA	NA	NA	NA	NA	NA	NA	NA	NA	NA	NA	NA	NA	NA	NA	NA
12	Guerrero	003	Ajuchitlán del Progreso	0082	Las Mesas del Guayabo (Las Mesas)	1004353	175032	1351	Terracería	Conexa a carretera	No hay transporte	No hay transporte	No hay transporte	No hay transporte	Sin hablantes de lengua indígena	Sin hablantes de lengua indígena	Sin hablantes de lengua indígena	Sin hablantes de lengua indígena	Sin hablantes de lengua indígena	Sin hablantes de lengua indígena	Sin hablantes de lengua indígena	Agricultura	Cría y explotación de animales	NE	NO	NO	NO	NO	SI	Falta de carretera o transporte	NA	NA	NA	NA	NA	NA	NA	NA	NA	NA	NA	NA	NA	NA	NA	NA	NA	NA	NA
12	Guerrero	003	Ajuchitlán del Progreso	0084	La Flor del Sur	1003635	174058	1475	NE	Conexión a carretera NE	Disponibilidad de transporte NE	Disponibilidad de transporte NE	Disponibilidad de transporte NE	Disponibilidad de transporte NE	Sin hablantes de lengua indígena	Sin hablantes de lengua indígena	Sin hablantes de lengua indígena	Sin hablantes de lengua indígena	Sin hablantes de lengua indígena	Sin hablantes de lengua indígena	Sin hablantes de lengua indígena	Agricultura	Cría y explotación de animales	NE	NO	NO	NO	NO	NO	Pobreza o marginación	NA	NA	NA	NA	NA	NA	NA	NA	NA	NA	NA	NA	NA	NA	NA	NA	NA	NA	NA
12	Guerrero	003	Ajuchitlán del Progreso	0085	La Lajita	1003529	174620	1242	Terracería	Conexa a carretera	No hay transporte	No hay transporte	No hay transporte	No hay transporte	Sin hablantes de lengua indígena	Sin hablantes de lengua indígena	Sin hablantes de lengua indígena	Sin hablantes de lengua indígena	Sin hablantes de lengua indígena	Sin hablantes de lengua indígena	Sin hablantes de lengua indígena	Agricultura	Cría y explotación de animales	NE	NO	NO	NO	NO	NO	Pobreza o marginación	NA	NA	NA	NA	NA	NA	NA	NA	NA	NA	NA	NA	NA	NA	NA	NA	NA	NA	NA
12	Guerrero	003	Ajuchitlán del Progreso	0086	El Pericón	1003446	174752	1556	No conexa a carretera	Distancia NE	Disponibilidad de transporte NE	Disponibilidad de transporte NE	Disponibilidad de transporte NE	Disponibilidad de transporte NE	Sin hablantes de lengua indígena	Sin hablantes de lengua indígena	Sin hablantes de lengua indígena	Sin hablantes de lengua indígena	Sin hablantes de lengua indígena	Sin hablantes de lengua indígena	Sin hablantes de lengua indígena	Agricultura	NE	NE	NO	NO	NO	NO	NO	Pobreza o marginación	NA	NA	NA	NA	NA	NA	NA	NA	NA	NA	NA	NA	NA	NA	NA	NA	NA	NA	NA
12	Guerrero	003	Ajuchitlán del Progreso	0087	Piedra Parada	1003110	180629	0319	Pavimentada	Conexa a carretera	Disponibilidad de transporte NE	Disponibilidad de transporte NE	Disponibilidad de transporte NE	Disponibilidad de transporte NE	Sin hablantes de lengua indígena	Sin hablantes de lengua indígena	Sin hablantes de lengua indígena	Sin hablantes de lengua indígena	Sin hablantes de lengua indígena	Sin hablantes de lengua indígena	Sin hablantes de lengua indígena	Agricultura	Cría y explotación de animales	NE	SI	NO	NO	NO	NO	Pobreza o marginación	NA	NA	NA	NA	NA	NA	NA	NA	NA	NA	NA	NA	NA	NA	NA	NA	NA	NA	NA
12	Guerrero	003	Ajuchitlán del Progreso	0088	El Jondeón	1003127	180614	0319	Terracería	Conexa a carretera	Micro, combi o camioneta	De 25 a 29 min	De 1 a 5 salidas al día	De 10 a 14 pesos	Sin hablantes de lengua indígena	Sin hablantes de lengua indígena	Sin hablantes de lengua indígena	Sin hablantes de lengua indígena	Sin hablantes de lengua indígena	Sin hablantes de lengua indígena	Sin hablantes de lengua indígena	Agricultura	NE	NE	NO	NO	NO	NO	SI	Pobreza o marginación	NA	NA	NA	NA	NA	NA	NA	NA	NA	NA	NA	NA	NA	NA	NA	NA	NA	NA	NA
12	Guerrero	003	Ajuchitlán del Progreso	0089	Los Fabianes	1002906	180933	0279	Pavimentada	Conexa a carretera	Micro, combi o camioneta	De 10 a 14 min	De 11 a 20 salidas al día	De 3 a 6 pesos	Sin hablantes de lengua indígena	Sin hablantes de lengua indígena	Sin hablantes de lengua indígena	Sin hablantes de lengua indígena	Sin hablantes de lengua indígena	Sin hablantes de lengua indígena	Sin hablantes de lengua indígena	Agricultura	NE	NE	NO	NO	NO	NO	NO	Falta de empleo o emigración	NA	NA	NA	NA	NA	NA	NA	NA	NA	NA	NA	NA	NA	NA	NA	NA	NA	NA	NA
12	Guerrero	003	Ajuchitlán del Progreso	0090	Las Palmitas	1002857	180846	0298	Terracería	Conexa a carretera	Micro, combi o camioneta	De 10 a 14 min	De 11 a 20 salidas al día	De 3 a 6 pesos	Sin hablantes de lengua indígena	Sin hablantes de lengua indígena	Sin hablantes de lengua indígena	Sin hablantes de lengua indígena	Sin hablantes de lengua indígena	Sin hablantes de lengua indígena	Sin hablantes de lengua indígena	Agricultura	Fabricación de productos a base de minerales no metálicos	Insuficientemente especificado del sector construcción	NO	NO	NO	NO	NO	Falta de empleo o emigración	NA	NA	NA	NA	NA	NA	NA	NA	NA	NA	NA	NA	NA	NA	NA	NA	NA	NA	NA
12	Guerrero	003	Ajuchitlán del Progreso	0092	Las Cruces	1002331	181318	0297	Pavimentada	Conexa a carretera	Micro, combi o camioneta	Más de 1 y hasta 1.5 horas	De 1 a 5 salidas al día	De 30 a 34 pesos	Sin hablantes de lengua indígena	Sin hablantes de lengua indígena	Sin hablantes de lengua indígena	Sin hablantes de lengua indígena	Sin hablantes de lengua indígena	Sin hablantes de lengua indígena	Sin hablantes de lengua indígena	Agricultura	Cría y explotación de animales	NE	NO	NO	NO	NO	NO	Falta de empleo o emigración	NA	NA	NA	NA	NA	NA	NA	NA	NA	NA	NA	NA	NA	NA	NA	NA	NA	NA	NA
12	Guerrero	003	Ajuchitlán del Progreso	0094	Agua Escondida	1002830	180723	0309	Terracería	Conexa a carretera	Camión de redilas o troca	De 30 a 60 min	De 1 a 5 salidas al día	De 20 a 24 pesos	Sin hablantes de lengua indígena	Sin hablantes de lengua indígena	Sin hablantes de lengua indígena	Sin hablantes de lengua indígena	Sin hablantes de lengua indígena	Sin hablantes de lengua indígena	Sin hablantes de lengua indígena	Agricultura	Cría y explotación de animales	NE	NO	NO	NO	NO	NO	Falta de empleo o emigración	NA	NA	NA	NA	NA	NA	NA	NA	NA	NA	NA	NA	NA	NA	NA	NA	NA	NA	NA
12	Guerrero	003	Ajuchitlán del Progreso	0100	Caballos	1003618	175733	1150	Terracería	Conexa a carretera	Micro, combi o camioneta	Más de 2 y hasta 3 horas	Frecuencia NE	Costo NE	Sin hablantes de lengua indígena	Sin hablantes de lengua indígena	Sin hablantes de lengua indígena	Sin hablantes de lengua indígena	Sin hablantes de lengua indígena	Sin hablantes de lengua indígena	Sin hablantes de lengua indígena	Cría y explotación de animales	Agricultura	NE	NO	NO	NO	NO	NO	Pobreza o marginación	NA	NA	NA	NA	NA	NA	NA	NA	NA	NA	NA	NA	NA	NA	NA	NA	NA	NA	NA
12	Guerrero	003	Ajuchitlán del Progreso	0101	La Cañita	1003921	174738	1460	Terracería	Conexa a carretera	No hay transporte	No hay transporte	No hay transporte	No hay transporte	Sin hablantes de lengua indígena	Sin hablantes de lengua indígena	Sin hablantes de lengua indígena	Sin hablantes de lengua indígena	Sin hablantes de lengua indígena	Sin hablantes de lengua indígena	Sin hablantes de lengua indígena	Cría y explotación de animales	Agricultura	NE	NO	NO	NO	NO	SI	Falta de equipamiento o servicios para la educación	NA	NA	NA	NA	NA	NA	NA	NA	NA	NA	NA	NA	NA	NA	NA	NA	NA	NA	NA
12	Guerrero	003	Ajuchitlán del Progreso	0108	El Cuajilote	1003454	180408	0640	Terracería	Conexa a carretera	Camión de redilas o troca	Más de 2 y hasta 3 horas	Sin salidas diarias	250 pesos y más	Sin hablantes de lengua indígena	Sin hablantes de lengua indígena	Sin hablantes de lengua indígena	Sin hablantes de lengua indígena	Sin hablantes de lengua indígena	Sin hablantes de lengua indígena	Sin hablantes de lengua indígena	Agricultura	Cría y explotación de animales	NE	NO	NO	NO	NO	NO	Falta de empleo o emigración	NA	NA	NA	NA	NA	NA	NA	NA	NA	NA	NA	NA	NA	NA	NA	NA	NA	NA	NA
12	Guerrero	003	Ajuchitlán del Progreso	0109	Cuatro Cruces (Palo Marcado)	1003117	173854	2504	Terracería	Conexa a carretera	Camión de redilas o troca	Más de 4 horas	Sin salidas diarias	Costo NE	Sin hablantes de lengua indígena	Sin hablantes de lengua indígena	Sin hablantes de lengua indígena	Sin hablantes de lengua indígena	Sin hablantes de lengua indígena	Sin hablantes de lengua indígena	Sin hablantes de lengua indígena	Agricultura	Cría y explotación de animales	NE	NO	NO	NO	NO	NO	Falta de empleo o emigración	NA	NA	NA	NA	NA	NA	NA	NA	NA	NA	NA	NA	NA	NA	NA	NA	NA	NA	NA
12	Guerrero	003	Ajuchitlán del Progreso	0114	Gómez Farías (El Limón)	1002829	180111	0417	Terracería	Conexa a carretera	Micro, combi o camioneta	De 30 a 60 min	De 1 a 5 salidas al día	De 30 a 34 pesos	Sin hablantes de lengua indígena	Sin hablantes de lengua indígena	Sin hablantes de lengua indígena	Sin hablantes de lengua indígena	Sin hablantes de lengua indígena	Sin hablantes de lengua indígena	Sin hablantes de lengua indígena	Agricultura	Cría y explotación de animales	NE	NO	NO	NO	NO	NO	Falta de otros servicios o equipamiento	NA	NA	NA	NA	NA	NA	NA	NA	NA	NA	NA	NA	NA	NA	NA	NA	NA	NA	NA
12	Guerrero	003	Ajuchitlán del Progreso	0118	Mesa de Corrales	1004147	180305	0597	Terracería	Conexa a carretera	No hay transporte	No hay transporte	No hay transporte	No hay transporte	Sin hablantes de lengua indígena	Sin hablantes de lengua indígena	Sin hablantes de lengua indígena	Sin hablantes de lengua indígena	Sin hablantes de lengua indígena	Sin hablantes de lengua indígena	Sin hablantes de lengua indígena	Agricultura	NE	NE	NO	NO	NO	NO	NO	Falta de carretera o transporte	NA	NA	NA	NA	NA	NA	NA	NA	NA	NA	NA	NA	NA	NA	NA	NA	NA	NA	NA
12	Guerrero	003	Ajuchitlán del Progreso	0121	Mesas de las Pilas	1003813	175255	1211	No conexa a carretera	Distancia NE	Disponibilidad de transporte NE	Disponibilidad de transporte NE	Disponibilidad de transporte NE	Disponibilidad de transporte NE	Sin hablantes de lengua indígena	Sin hablantes de lengua indígena	Sin hablantes de lengua indígena	Sin hablantes de lengua indígena	Sin hablantes de lengua indígena	Sin hablantes de lengua indígena	Sin hablantes de lengua indígena	NE	NE	NE	NE	NE	NE	NE	NE	No especificado	NA	NA	NA	NA	NA	NA	NA	NA	NA	NA	NA	NA	NA	NA	NA	NA	NA	NA	NA
12	Guerrero	003	Ajuchitlán del Progreso	0124	El Monte	1004144	180018	0940	Terracería	Conexa a carretera	Disponibilidad de transporte NE	Disponibilidad de transporte NE	Disponibilidad de transporte NE	Disponibilidad de transporte NE	Sin hablantes de lengua indígena	Sin hablantes de lengua indígena	Sin hablantes de lengua indígena	Sin hablantes de lengua indígena	Sin hablantes de lengua indígena	Sin hablantes de lengua indígena	Sin hablantes de lengua indígena	Agricultura	NE	NE	NE	NE	NE	NE	NE	Falta de carretera o transporte	NA	NA	NA	NA	NA	NA	NA	NA	NA	NA	NA	NA	NA	NA	NA	NA	NA	NA	NA
12	Guerrero	003	Ajuchitlán del Progreso	0128	Palos Grandes	1003450	181221	0304	Terracería	Conexa a carretera	No hay transporte	No hay transporte	No hay transporte	No hay transporte	Sin hablantes de lengua indígena	Sin hablantes de lengua indígena	Sin hablantes de lengua indígena	Sin hablantes de lengua indígena	Sin hablantes de lengua indígena	Sin hablantes de lengua indígena	Sin hablantes de lengua indígena	Agricultura	NE	NE	NO	NO	NO	NO	NO	Falta de infraestructura o servicio de agua	NA	NA	NA	NA	NA	NA	NA	NA	NA	NA	NA	NA	NA	NA	NA	NA	NA	NA	NA
12	Guerrero	003	Ajuchitlán del Progreso	0132	Paso Ancho	1003953	180204	0548	Terracería	Conexa a carretera	Camión de redilas o troca	Más de 4 horas	Sin salidas diarias	250 pesos y más	Sin hablantes de lengua indígena	Sin hablantes de lengua indígena	Sin hablantes de lengua indígena	Sin hablantes de lengua indígena	Sin hablantes de lengua indígena	Sin hablantes de lengua indígena	Sin hablantes de lengua indígena	Agricultura	Cría y explotación de animales	NE	NO	NO	NO	NO	NO	Falta de empleo o emigración	NA	NA	NA	NA	NA	NA	NA	NA	NA	NA	NA	NA	NA	NA	NA	NA	NA	NA	NA
12	Guerrero	003	Ajuchitlán del Progreso	0134	Pocitos del Balcón	1003159	174159	2599	Terracería	Conexa a carretera	Otro medio de transporte	Tiempo de traslado NE	Sin salidas diarias	Costo NE	Sin hablantes de lengua indígena	Sin hablantes de lengua indígena	Sin hablantes de lengua indígena	Sin hablantes de lengua indígena	Sin hablantes de lengua indígena	Sin hablantes de lengua indígena	Sin hablantes de lengua indígena	Agricultura	Industria de la madera	NE	NO	NO	NO	NO	NO	Falta de energía eléctrica	NO	Red de agua no disponible	NO	Red de drenaje no disponible	SI	NE	Queman la basura	NO	NO	NO	SI	SI	SI	NO	NO	NO	NO	SI	SI
12	Guerrero	003	Ajuchitlán del Progreso	0135	El Polvorín	1003132	180413	0347	Terracería	Conexa a carretera	No hay transporte	No hay transporte	No hay transporte	No hay transporte	Sin hablantes de lengua indígena	Sin hablantes de lengua indígena	Sin hablantes de lengua indígena	Sin hablantes de lengua indígena	Sin hablantes de lengua indígena	Sin hablantes de lengua indígena	Sin hablantes de lengua indígena	Agricultura	NE	NE	NO	NO	NO	NO	NO	Pobreza o marginación	NA	NA	NA	NA	NA	NA	NA	NA	NA	NA	NA	NA	NA	NA	NA	NA	NA	NA	NA
12	Guerrero	003	Ajuchitlán del Progreso	0145	El Timbre	1003547	181621	0250	Pavimentada	Conexa a carretera	Micro, combi o camioneta	De 25 a 29 min	De 31 a 60 salidas al día	De 15 a 19 pesos	Sin hablantes de lengua indígena	Sin hablantes de lengua indígena	Sin hablantes de lengua indígena	Sin hablantes de lengua indígena	Sin hablantes de lengua indígena	Sin hablantes de lengua indígena	Sin hablantes de lengua indígena	Agricultura	Fabricación de productos a base de minerales no metálicos	NE	NO	NO	NO	NO	NO	Sin problema	NA	NA	NA	NA	NA	NA	NA	NA	NA	NA	NA	NA	NA	NA	NA	NA	NA	NA	NA
12	Guerrero	003	Ajuchitlán del Progreso	0146	Las Tinajas	1002918	174104	1429	NE	Conexión a carretera NE	Disponibilidad de transporte NE	Disponibilidad de transporte NE	Disponibilidad de transporte NE	Disponibilidad de transporte NE	NE	Hablantes de lengua indígena NE	Hablantes de lengua indígena NE	Hablantes de lengua indígena NE	Hablantes de lengua indígena NE	Hablantes de lengua indígena NE	Hablantes de lengua indígena NE	NE	NE	NE	NE	NE	NE	NE	NE	No especificado	NA	NA	NA	NA	NA	NA	NA	NA	NA	NA	NA	NA	NA	NA	NA	NA	NA	NA	NA
12	Guerrero	003	Ajuchitlán del Progreso	0147	El Uge	1003909	175827	0636	Terracería	Conexa a carretera	Disponibilidad de transporte NE	Disponibilidad de transporte NE	Disponibilidad de transporte NE	Disponibilidad de transporte NE	Sin hablantes de lengua indígena	Sin hablantes de lengua indígena	Sin hablantes de lengua indígena	Sin hablantes de lengua indígena	Sin hablantes de lengua indígena	Sin hablantes de lengua indígena	Sin hablantes de lengua indígena	Agricultura	Cría y explotación de animales	NE	NO	NO	NO	NO	NO	Pobreza o marginación	NA	NA	NA	NA	NA	NA	NA	NA	NA	NA	NA	NA	NA	NA	NA	NA	NA	NA	NA
12	Guerrero	003	Ajuchitlán del Progreso	0151	Zapotitlán	1003809	180708	0542	Terracería	Conexa a carretera	No hay transporte	No hay transporte	No hay transporte	No hay transporte	Sin hablantes de lengua indígena	Sin hablantes de lengua indígena	Sin hablantes de lengua indígena	Sin hablantes de lengua indígena	Sin hablantes de lengua indígena	Sin hablantes de lengua indígena	Sin hablantes de lengua indígena	Agricultura	Cría y explotación de animales	NE	NO	NO	NO	NO	SI	Falta de infraestructura o servicio de agua	NA	NA	NA	NA	NA	NA	NA	NA	NA	NA	NA	NA	NA	NA	NA	NA	NA	NA	NA
12	Guerrero	003	Ajuchitlán del Progreso	0160	El Zapotal	1003105	175013	0857	Terracería	Conexa a carretera	Camión de redilas o troca	Más de 4 horas	Sin salidas diarias	Costo NE	Sin hablantes de lengua indígena	Sin hablantes de lengua indígena	Sin hablantes de lengua indígena	Sin hablantes de lengua indígena	Sin hablantes de lengua indígena	Sin hablantes de lengua indígena	Sin hablantes de lengua indígena	Agricultura	Cría y explotación de animales	NE	NO	NO	NO	NO	NO	Falta de empleo o emigración	NA	NA	NA	NA	NA	NA	NA	NA	NA	NA	NA	NA	NA	NA	NA	NA	NA	NA	NA
12	Guerrero	003	Ajuchitlán del Progreso	0161	Pueblito Nuevo	1003112	180852	0295	Pavimentada	Conexa a carretera	No hay transporte	No hay transporte	No hay transporte	No hay transporte	Sin hablantes de lengua indígena	Sin hablantes de lengua indígena	Sin hablantes de lengua indígena	Sin hablantes de lengua indígena	Sin hablantes de lengua indígena	Sin hablantes de lengua indígena	Sin hablantes de lengua indígena	Agricultura	NE	NE	NO	NO	NO	NO	NO	Pobreza o marginación	NA	NA	NA	NA	NA	NA	NA	NA	NA	NA	NA	NA	NA	NA	NA	NA	NA	NA	NA
12	Guerrero	003	Ajuchitlán del Progreso	0162	Corre Pescado	1003130	180756	0320	Pavimentada	Conexa a carretera	No hay transporte	No hay transporte	No hay transporte	No hay transporte	Sin hablantes de lengua indígena	Sin hablantes de lengua indígena	Sin hablantes de lengua indígena	Sin hablantes de lengua indígena	Sin hablantes de lengua indígena	Sin hablantes de lengua indígena	Sin hablantes de lengua indígena	Agricultura	NE	NE	NO	NO	NO	NO	NO	Falta de infraestructura o servicio de agua	NA	NA	NA	NA	NA	NA	NA	NA	NA	NA	NA	NA	NA	NA	NA	NA	NA	NA	NA
12	Guerrero	003	Ajuchitlán del Progreso	0164	El Arroyo	1004138	180443	0520	NE	Conexión a carretera NE	Disponibilidad de transporte NE	Disponibilidad de transporte NE	Disponibilidad de transporte NE	Disponibilidad de transporte NE	NE	Hablantes de lengua indígena NE	Hablantes de lengua indígena NE	Hablantes de lengua indígena NE	Hablantes de lengua indígena NE	Hablantes de lengua indígena NE	Hablantes de lengua indígena NE	NE	NE	NE	NE	NE	NE	NE	NE	No especificado	NA	NA	NA	NA	NA	NA	NA	NA	NA	NA	NA	NA	NA	NA	NA	NA	NA	NA	NA
12	Guerrero	003	Ajuchitlán del Progreso	0167	Charco Azul	1002846	180359	0381	Terracería	Conexa a carretera	Micro, combi o camioneta	De 30 a 60 min	De 1 a 5 salidas al día	De 25 a 29 pesos	Sin hablantes de lengua indígena	Sin hablantes de lengua indígena	Sin hablantes de lengua indígena	Sin hablantes de lengua indígena	Sin hablantes de lengua indígena	Sin hablantes de lengua indígena	Sin hablantes de lengua indígena	Agricultura	Cría y explotación de animales	NE	NO	NO	NO	NO	NO	Falta de infraestructura o servicio de agua	NA	NA	NA	NA	NA	NA	NA	NA	NA	NA	NA	NA	NA	NA	NA	NA	NA	NA	NA
12	Guerrero	003	Ajuchitlán del Progreso	0168	Charco de la Vaca	1003412	180220	0757	Terracería	Conexa a carretera	Camión de redilas o troca	Más de 1.5 y hasta 2 horas	Sin salidas diarias	De 200 a 249 pesos	Sin hablantes de lengua indígena	Sin hablantes de lengua indígena	Sin hablantes de lengua indígena	Sin hablantes de lengua indígena	Sin hablantes de lengua indígena	Sin hablantes de lengua indígena	Sin hablantes de lengua indígena	Agricultura	NE	NE	NO	NO	NO	NO	NO	Falta de empleo o emigración	NA	NA	NA	NA	NA	NA	NA	NA	NA	NA	NA	NA	NA	NA	NA	NA	NA	NA	NA
12	Guerrero	003	Ajuchitlán del Progreso	0169	Los Pinzanes	1003306	180236	0487	Terracería	Conexa a carretera	No hay transporte	No hay transporte	No hay transporte	No hay transporte	Sin hablantes de lengua indígena	Sin hablantes de lengua indígena	Sin hablantes de lengua indígena	Sin hablantes de lengua indígena	Sin hablantes de lengua indígena	Sin hablantes de lengua indígena	Sin hablantes de lengua indígena	Agricultura	NE	NE	NO	NO	NO	NO	NO	Falta de empleo o emigración	NA	NA	NA	NA	NA	NA	NA	NA	NA	NA	NA	NA	NA	NA	NA	NA	NA	NA	NA
12	Guerrero	003	Ajuchitlán del Progreso	0173	Mesa Verde	1003141	174355	1590	NE	Conexión a carretera NE	Disponibilidad de transporte NE	Disponibilidad de transporte NE	Disponibilidad de transporte NE	Disponibilidad de transporte NE	Sin hablantes de lengua indígena	Sin hablantes de lengua indígena	Sin hablantes de lengua indígena	Sin hablantes de lengua indígena	Sin hablantes de lengua indígena	Sin hablantes de lengua indígena	Sin hablantes de lengua indígena	Agricultura	NE	NE	NO	NO	NO	NO	NO	Pobreza o marginación	NA	NA	NA	NA	NA	NA	NA	NA	NA	NA	NA	NA	NA	NA	NA	NA	NA	NA	NA
12	Guerrero	003	Ajuchitlán del Progreso	0175	El Rinconcito	1003005	174035	1955	Terracería	Conexa a carretera	Disponibilidad de transporte NE	Disponibilidad de transporte NE	Disponibilidad de transporte NE	Disponibilidad de transporte NE	Sin hablantes de lengua indígena	Sin hablantes de lengua indígena	Sin hablantes de lengua indígena	Sin hablantes de lengua indígena	Sin hablantes de lengua indígena	Sin hablantes de lengua indígena	Sin hablantes de lengua indígena	Agricultura	NE	NE	NO	NO	NO	NO	NO	Pobreza o marginación	NA	NA	NA	NA	NA	NA	NA	NA	NA	NA	NA	NA	NA	NA	NA	NA	NA	NA	NA
12	Guerrero	003	Ajuchitlán del Progreso	0176	La Hacienda Santa Fe	1003937	180418	0497	Terracería	Conexa a carretera	No hay transporte	No hay transporte	No hay transporte	No hay transporte	Sin hablantes de lengua indígena	Sin hablantes de lengua indígena	Sin hablantes de lengua indígena	Sin hablantes de lengua indígena	Sin hablantes de lengua indígena	Sin hablantes de lengua indígena	Sin hablantes de lengua indígena	Agricultura	Cría y explotación de animales	NE	NO	NO	NO	NO	NO	Falta de empleo o emigración	NA	NA	NA	NA	NA	NA	NA	NA	NA	NA	NA	NA	NA	NA	NA	NA	NA	NA	NA
12	Guerrero	003	Ajuchitlán del Progreso	0178	El Rincón	1003012	173930	1982	NE	Conexión a carretera NE	Disponibilidad de transporte NE	Disponibilidad de transporte NE	Disponibilidad de transporte NE	Disponibilidad de transporte NE	NE	Hablantes de lengua indígena NE	Hablantes de lengua indígena NE	Hablantes de lengua indígena NE	Hablantes de lengua indígena NE	Hablantes de lengua indígena NE	Hablantes de lengua indígena NE	NE	NE	NE	NE	NE	NE	NE	NE	No especificado	NA	NA	NA	NA	NA	NA	NA	NA	NA	NA	NA	NA	NA	NA	NA	NA	NA	NA	NA
12	Guerrero	003	Ajuchitlán del Progreso	0184	El Cirián	1003813	175645	0684	NE	Conexión a carretera NE	Disponibilidad de transporte NE	Disponibilidad de transporte NE	Disponibilidad de transporte NE	Disponibilidad de transporte NE	Sin hablantes de lengua indígena	Sin hablantes de lengua indígena	Sin hablantes de lengua indígena	Sin hablantes de lengua indígena	Sin hablantes de lengua indígena	Sin hablantes de lengua indígena	Sin hablantes de lengua indígena	Agricultura	NE	NE	NO	NO	NO	NO	NO	Pobreza o marginación	NA	NA	NA	NA	NA	NA	NA	NA	NA	NA	NA	NA	NA	NA	NA	NA	NA	NA	NA
12	Guerrero	003	Ajuchitlán del Progreso	0185	Colonia Villa Hermosa	1003246	181213	0285	Pavimentada	Conexa a carretera	Micro, combi o camioneta	DE 15 A 19 MIN	De 31 a 60 salidas al día	De 10 a 14 pesos	Sin hablantes de lengua indígena	Sin hablantes de lengua indígena	Sin hablantes de lengua indígena	Sin hablantes de lengua indígena	Sin hablantes de lengua indígena	Sin hablantes de lengua indígena	Sin hablantes de lengua indígena	Agricultura	NE	NE	NO	NO	NO	NO	SI	Falta de empleo o emigración	NE	Disponibilidad de red de agua NE	NE	Disponibilidad NE	NE	NE	Recolección y limpieza NE	NE	NE	NE	NE	NE	NE	NE	NE	NE	NE	NE	NE
12	Guerrero	003	Ajuchitlán del Progreso	0186	Chilacayote	1003718	174256	1560	Terracería	Conexa a carretera	Disponibilidad de transporte NE	Disponibilidad de transporte NE	Disponibilidad de transporte NE	Disponibilidad de transporte NE	Sin hablantes de lengua indígena	Sin hablantes de lengua indígena	Sin hablantes de lengua indígena	Sin hablantes de lengua indígena	Sin hablantes de lengua indígena	Sin hablantes de lengua indígena	Sin hablantes de lengua indígena	Cría y explotación de animales	Agricultura	NE	NO	NO	NO	NO	NO	Pobreza o marginación	NA	NA	NA	NA	NA	NA	NA	NA	NA	NA	NA	NA	NA	NA	NA	NA	NA	NA	NA
12	Guerrero	003	Ajuchitlán del Progreso	0187	La Desdicha	1003508	174306	1785	Terracería	Conexa a carretera	No hay transporte	No hay transporte	No hay transporte	No hay transporte	Sin hablantes de lengua indígena	Sin hablantes de lengua indígena	Sin hablantes de lengua indígena	Sin hablantes de lengua indígena	Sin hablantes de lengua indígena	Sin hablantes de lengua indígena	Sin hablantes de lengua indígena	Cría y explotación de animales	Agricultura	NE	SI	NO	NO	NO	NO	Falta de carretera o transporte	NA	NA	NA	NA	NA	NA	NA	NA	NA	NA	NA	NA	NA	NA	NA	NA	NA	NA	NA
12	Guerrero	003	Ajuchitlán del Progreso	0188	Fresnitos	1003913	174039	1745	Terracería	Conexa a carretera	Camión de redilas o troca	Más de 4 horas	Sin salidas diarias	Costo NE	Sin hablantes de lengua indígena	Sin hablantes de lengua indígena	Sin hablantes de lengua indígena	Sin hablantes de lengua indígena	Sin hablantes de lengua indígena	Sin hablantes de lengua indígena	Sin hablantes de lengua indígena	Agricultura	Cría y explotación de animales	NE	NO	NO	NO	NO	NO	Falta de empleo o emigración	NA	NA	NA	NA	NA	NA	NA	NA	NA	NA	NA	NA	NA	NA	NA	NA	NA	NA	NA
12	Guerrero	003	Ajuchitlán del Progreso	0189	El Jabalí	1003254	175351	1320	Terracería	Conexa a carretera	Disponibilidad de transporte NE	Disponibilidad de transporte NE	Disponibilidad de transporte NE	Disponibilidad de transporte NE	Sin hablantes de lengua indígena	Sin hablantes de lengua indígena	Sin hablantes de lengua indígena	Sin hablantes de lengua indígena	Sin hablantes de lengua indígena	Sin hablantes de lengua indígena	Sin hablantes de lengua indígena	Agricultura	Cría y explotación de animales	NE	NO	NO	NO	NO	NO	Pobreza o marginación	NA	NA	NA	NA	NA	NA	NA	NA	NA	NA	NA	NA	NA	NA	NA	NA	NA	NA	NA
12	Guerrero	003	Ajuchitlán del Progreso	0195	Pinzanal	1003026	175124	0775	Terracería	Conexa a carretera	Disponibilidad de transporte NE	Disponibilidad de transporte NE	Disponibilidad de transporte NE	Disponibilidad de transporte NE	Sin hablantes de lengua indígena	Sin hablantes de lengua indígena	Sin hablantes de lengua indígena	Sin hablantes de lengua indígena	Sin hablantes de lengua indígena	Sin hablantes de lengua indígena	Sin hablantes de lengua indígena	Agricultura	NE	NE	NO	NO	NO	NO	NO	Pobreza o marginación	NA	NA	NA	NA	NA	NA	NA	NA	NA	NA	NA	NA	NA	NA	NA	NA	NA	NA	NA
12	Guerrero	003	Ajuchitlán del Progreso	0198	San Marcos Oriente	1002605	181014	0289	Terracería	Conexa a carretera	No hay transporte	No hay transporte	No hay transporte	No hay transporte	Sin hablantes de lengua indígena	Sin hablantes de lengua indígena	Sin hablantes de lengua indígena	Sin hablantes de lengua indígena	Sin hablantes de lengua indígena	Sin hablantes de lengua indígena	Sin hablantes de lengua indígena	Agricultura	NE	NE	NO	NO	NO	NO	NO	Falta de infraestructura o servicio de agua	NA	NA	NA	NA	NA	NA	NA	NA	NA	NA	NA	NA	NA	NA	NA	NA	NA	NA	NA
12	Guerrero	003	Ajuchitlán del Progreso	0200	Plan de Azaleas	1002638	175926	0463	Terracería	Conexa a carretera	Disponibilidad de transporte NE	Disponibilidad de transporte NE	Disponibilidad de transporte NE	Disponibilidad de transporte NE	Sin hablantes de lengua indígena	Sin hablantes de lengua indígena	Sin hablantes de lengua indígena	Sin hablantes de lengua indígena	Sin hablantes de lengua indígena	Sin hablantes de lengua indígena	Sin hablantes de lengua indígena	Agricultura	NE	NE	NO	NO	NO	NO	NO	Pobreza o marginación	NA	NA	NA	NA	NA	NA	NA	NA	NA	NA	NA	NA	NA	NA	NA	NA	NA	NA	NA
12	Guerrero	003	Ajuchitlán del Progreso	0201	Arroyo del Guayabo	1004126	175301	0772	No conexa a carretera	De 1 a 3 km	No hay transporte	No hay transporte	No hay transporte	No hay transporte	Sin hablantes de lengua indígena	Sin hablantes de lengua indígena	Sin hablantes de lengua indígena	Sin hablantes de lengua indígena	Sin hablantes de lengua indígena	Sin hablantes de lengua indígena	Sin hablantes de lengua indígena	Agricultura	Cría y explotación de animales	NE	NO	NO	NO	NO	NO	Falta de carretera o transporte	NA	NA	NA	NA	NA	NA	NA	NA	NA	NA	NA	NA	NA	NA	NA	NA	NA	NA	NA
12	Guerrero	003	Ajuchitlán del Progreso	0206	El Horcón	1003446	175922	1463	Terracería	Conexa a carretera	Micro, combi o camioneta	Más de 1 y hasta 1.5 horas	Frecuencia NE	Costo NE	Sin hablantes de lengua indígena	Sin hablantes de lengua indígena	Sin hablantes de lengua indígena	Sin hablantes de lengua indígena	Sin hablantes de lengua indígena	Sin hablantes de lengua indígena	Sin hablantes de lengua indígena	Cría y explotación de animales	Agricultura	NE	NO	NO	NO	NO	NO	Pobreza o marginación	NA	NA	NA	NA	NA	NA	NA	NA	NA	NA	NA	NA	NA	NA	NA	NA	NA	NA	NA
12	Guerrero	003	Ajuchitlán del Progreso	0209	Lomas del Cuero	1003319	180412	0566	Terracería	Conexa a carretera	Camión de redilas o troca	Más de 1.5 y hasta 2 horas	Sin salidas diarias	De 200 a 249 pesos	Sin hablantes de lengua indígena	Sin hablantes de lengua indígena	Sin hablantes de lengua indígena	Sin hablantes de lengua indígena	Sin hablantes de lengua indígena	Sin hablantes de lengua indígena	Sin hablantes de lengua indígena	Agricultura	NE	NE	NO	NO	NO	NO	NO	Falta de empleo o emigración	NA	NA	NA	NA	NA	NA	NA	NA	NA	NA	NA	NA	NA	NA	NA	NA	NA	NA	NA
12	Guerrero	003	Ajuchitlán del Progreso	0211	El Mango	1003438	180421	0539	Terracería	Conexa a carretera	No hay transporte	No hay transporte	No hay transporte	No hay transporte	Sin hablantes de lengua indígena	Sin hablantes de lengua indígena	Sin hablantes de lengua indígena	Sin hablantes de lengua indígena	Sin hablantes de lengua indígena	Sin hablantes de lengua indígena	Sin hablantes de lengua indígena	Agricultura	NE	NE	NO	NO	NO	NO	NO	Pobreza o marginación	NA	NA	NA	NA	NA	NA	NA	NA	NA	NA	NA	NA	NA	NA	NA	NA	NA	NA	NA
12	Guerrero	003	Ajuchitlán del Progreso	0220	El Tejocote	1004608	174011	1900	Terracería	Conexa a carretera	Disponibilidad de transporte NE	Disponibilidad de transporte NE	Disponibilidad de transporte NE	Disponibilidad de transporte NE	Sin hablantes de lengua indígena	Sin hablantes de lengua indígena	Sin hablantes de lengua indígena	Sin hablantes de lengua indígena	Sin hablantes de lengua indígena	Sin hablantes de lengua indígena	Sin hablantes de lengua indígena	Agricultura	Industria de la madera	NE	SI	NO	NO	NO	NO	Irregularidad o disputa relacionada con la tenencia de la tierra	NA	NA	NA	NA	NA	NA	NA	NA	NA	NA	NA	NA	NA	NA	NA	NA	NA	NA	NA
12	Guerrero	003	Ajuchitlán del Progreso	0224	Las Chicas	1003913	175910	0600	Terracería	Conexa a carretera	Disponibilidad de transporte NE	Disponibilidad de transporte NE	Disponibilidad de transporte NE	Disponibilidad de transporte NE	Sin hablantes de lengua indígena	Sin hablantes de lengua indígena	Sin hablantes de lengua indígena	Sin hablantes de lengua indígena	Sin hablantes de lengua indígena	Sin hablantes de lengua indígena	Sin hablantes de lengua indígena	Agricultura	NE	NE	NO	NO	NO	NO	NO	Pobreza o marginación	NA	NA	NA	NA	NA	NA	NA	NA	NA	NA	NA	NA	NA	NA	NA	NA	NA	NA	NA
12	Guerrero	003	Ajuchitlán del Progreso	0227	Plan de la Gallina	1003328	180657	0458	Terracería	Conexa a carretera	Camión de redilas o troca	Más de 1.5 y hasta 2 horas	Sin salidas diarias	De 200 a 249 pesos	Sin hablantes de lengua indígena	Sin hablantes de lengua indígena	Sin hablantes de lengua indígena	Sin hablantes de lengua indígena	Sin hablantes de lengua indígena	Sin hablantes de lengua indígena	Sin hablantes de lengua indígena	Agricultura	NE	NE	NO	NO	NO	NO	NO	Falta de empleo o emigración	NA	NA	NA	NA	NA	NA	NA	NA	NA	NA	NA	NA	NA	NA	NA	NA	NA	NA	NA
12	Guerrero	003	Ajuchitlán del Progreso	0229	Santa María Santa Fe	1004018	180644	0477	Terracería	Conexa a carretera	No hay transporte	No hay transporte	No hay transporte	No hay transporte	Sin hablantes de lengua indígena	Sin hablantes de lengua indígena	Sin hablantes de lengua indígena	Sin hablantes de lengua indígena	Sin hablantes de lengua indígena	Sin hablantes de lengua indígena	Sin hablantes de lengua indígena	Agricultura	NE	NE	NO	NO	NO	NO	NO	Pobreza o marginación	NA	NA	NA	NA	NA	NA	NA	NA	NA	NA	NA	NA	NA	NA	NA	NA	NA	NA	NA
12	Guerrero	003	Ajuchitlán del Progreso	0231	Agua Zarca	1003329	175050	1959	Terracería	Conexa a carretera	Disponibilidad de transporte NE	Disponibilidad de transporte NE	Disponibilidad de transporte NE	Disponibilidad de transporte NE	Sin hablantes de lengua indígena	Sin hablantes de lengua indígena	Sin hablantes de lengua indígena	Sin hablantes de lengua indígena	Sin hablantes de lengua indígena	Sin hablantes de lengua indígena	Sin hablantes de lengua indígena	Cría y explotación de animales	Agricultura	NE	NO	NO	NO	NO	NO	Pobreza o marginación	NA	NA	NA	NA	NA	NA	NA	NA	NA	NA	NA	NA	NA	NA	NA	NA	NA	NA	NA
12	Guerrero	003	Ajuchitlán del Progreso	0236	El Cuajilotito	1003727	180728	0745	No conexa a carretera	Distancia NE	No hay transporte	No hay transporte	No hay transporte	No hay transporte	Sin hablantes de lengua indígena	Sin hablantes de lengua indígena	Sin hablantes de lengua indígena	Sin hablantes de lengua indígena	Sin hablantes de lengua indígena	Sin hablantes de lengua indígena	Sin hablantes de lengua indígena	Agricultura	NE	NE	NO	NO	NO	NO	NO	Pobreza o marginación	NA	NA	NA	NA	NA	NA	NA	NA	NA	NA	NA	NA	NA	NA	NA	NA	NA	NA	NA
12	Guerrero	003	Ajuchitlán del Progreso	0238	Los Horcones	1003929	174607	2073	Terracería	Conexa a carretera	Camión de redilas o troca	Más de 4 horas	Sin salidas diarias	250 pesos y más	Sin hablantes de lengua indígena	Sin hablantes de lengua indígena	Sin hablantes de lengua indígena	Sin hablantes de lengua indígena	Sin hablantes de lengua indígena	Sin hablantes de lengua indígena	Sin hablantes de lengua indígena	Agricultura	Cría y explotación de animales	NE	NO	NO	NO	NO	NO	Falta de empleo o emigración	NA	NA	NA	NA	NA	NA	NA	NA	NA	NA	NA	NA	NA	NA	NA	NA	NA	NA	NA
12	Guerrero	003	Ajuchitlán del Progreso	0239	La Llave	1003447	173805	2087	Terracería	Conexa a carretera	No hay transporte	No hay transporte	No hay transporte	No hay transporte	Sin hablantes de lengua indígena	Sin hablantes de lengua indígena	Sin hablantes de lengua indígena	Sin hablantes de lengua indígena	Sin hablantes de lengua indígena	Sin hablantes de lengua indígena	Sin hablantes de lengua indígena	Agricultura	Cría y explotación de animales	NE	NO	NO	NO	NO	NO	Pobreza o marginación	NA	NA	NA	NA	NA	NA	NA	NA	NA	NA	NA	NA	NA	NA	NA	NA	NA	NA	NA
12	Guerrero	003	Ajuchitlán del Progreso	0243	Puerto de la Sangrinaria	1002933	173433	2441	Terracería	Conexa a carretera	Disponibilidad de transporte NE	Disponibilidad de transporte NE	Disponibilidad de transporte NE	Disponibilidad de transporte NE	Sin hablantes de lengua indígena	Sin hablantes de lengua indígena	Sin hablantes de lengua indígena	Sin hablantes de lengua indígena	Sin hablantes de lengua indígena	Sin hablantes de lengua indígena	Sin hablantes de lengua indígena	Agricultura	NE	NE	NO	NO	NO	NO	NO	Pobreza o marginación	NA	NA	NA	NA	NA	NA	NA	NA	NA	NA	NA	NA	NA	NA	NA	NA	NA	NA	NA
12	Guerrero	003	Ajuchitlán del Progreso	0244	Palo Barrenado	1003312	174716	1965	Terracería	Conexa a carretera	Camión de redilas o troca	Más de 4 horas	Sin salidas diarias	250 pesos y más	Sin hablantes de lengua indígena	Sin hablantes de lengua indígena	Sin hablantes de lengua indígena	Sin hablantes de lengua indígena	Sin hablantes de lengua indígena	Sin hablantes de lengua indígena	Sin hablantes de lengua indígena	Agricultura	Cría y explotación de animales	NE	NO	NO	NO	NO	NO	Falta de empleo o emigración	NA	NA	NA	NA	NA	NA	NA	NA	NA	NA	NA	NA	NA	NA	NA	NA	NA	NA	NA
12	Guerrero	003	Ajuchitlán del Progreso	0245	La Perla	1003322	181506	0260	Terracería	Conexa a carretera	Micro, combi o camioneta	DE 15 A 19 MIN	Más de 60 salidas	De 20 a 24 pesos	Sin hablantes de lengua indígena	Sin hablantes de lengua indígena	Sin hablantes de lengua indígena	Sin hablantes de lengua indígena	Sin hablantes de lengua indígena	Sin hablantes de lengua indígena	Sin hablantes de lengua indígena	Agricultura	NE	NE	NO	NO	NO	NO	SI	Falta de empleo o emigración	NA	NA	NA	NA	NA	NA	NA	NA	NA	NA	NA	NA	NA	NA	NA	NA	NA	NA	NA
12	Guerrero	003	Ajuchitlán del Progreso	0247	El Paraje de la Laguna	1003459	181544	0260	Terracería	Conexa a carretera	Micro, combi o camioneta	De 30 a 60 min	De 31 a 60 salidas al día	De 15 a 19 pesos	Sin hablantes de lengua indígena	Sin hablantes de lengua indígena	Sin hablantes de lengua indígena	Sin hablantes de lengua indígena	Sin hablantes de lengua indígena	Sin hablantes de lengua indígena	Sin hablantes de lengua indígena	Agricultura	NE	NE	NO	NO	NO	NO	NO	Falta de infraestructura o servicio de agua	NA	NA	NA	NA	NA	NA	NA	NA	NA	NA	NA	NA	NA	NA	NA	NA	NA	NA	NA
12	Guerrero	003	Ajuchitlán del Progreso	0250	La Sidra	1003322	174724	1776	Terracería	Conexa a carretera	Disponibilidad de transporte NE	Disponibilidad de transporte NE	Disponibilidad de transporte NE	Disponibilidad de transporte NE	Sin hablantes de lengua indígena	Sin hablantes de lengua indígena	Sin hablantes de lengua indígena	Sin hablantes de lengua indígena	Sin hablantes de lengua indígena	Sin hablantes de lengua indígena	Sin hablantes de lengua indígena	Agricultura	NE	NE	NO	NO	NO	NO	NO	Pobreza o marginación	NA	NA	NA	NA	NA	NA	NA	NA	NA	NA	NA	NA	NA	NA	NA	NA	NA	NA	NA
12	Guerrero	003	Ajuchitlán del Progreso	0251	Los Tepetates	1002810	181029	0278	Terracería	Conexa a carretera	No hay transporte	No hay transporte	No hay transporte	No hay transporte	Sin hablantes de lengua indígena	Sin hablantes de lengua indígena	Sin hablantes de lengua indígena	Sin hablantes de lengua indígena	Sin hablantes de lengua indígena	Sin hablantes de lengua indígena	Sin hablantes de lengua indígena	Agricultura	NE	NE	NO	NO	NO	NO	NO	Falta de empleo o emigración	NA	NA	NA	NA	NA	NA	NA	NA	NA	NA	NA	NA	NA	NA	NA	NA	NA	NA	NA
12	Guerrero	003	Ajuchitlán del Progreso	0252	El Tigre	1004325	175217	1892	NE	Conexión a carretera NE	Disponibilidad de transporte NE	Disponibilidad de transporte NE	Disponibilidad de transporte NE	Disponibilidad de transporte NE	Sin hablantes de lengua indígena	Sin hablantes de lengua indígena	Sin hablantes de lengua indígena	Sin hablantes de lengua indígena	Sin hablantes de lengua indígena	Sin hablantes de lengua indígena	Sin hablantes de lengua indígena	Agricultura	NE	NE	NO	NO	NO	NO	NO	Pobreza o marginación	NA	NA	NA	NA	NA	NA	NA	NA	NA	NA	NA	NA	NA	NA	NA	NA	NA	NA	NA
12	Guerrero	003	Ajuchitlán del Progreso	0255	La Sanguinaria	1003032	173554	2695	NE	Conexión a carretera NE	Disponibilidad de transporte NE	Disponibilidad de transporte NE	Disponibilidad de transporte NE	Disponibilidad de transporte NE	Sin hablantes de lengua indígena	Sin hablantes de lengua indígena	Sin hablantes de lengua indígena	Sin hablantes de lengua indígena	Sin hablantes de lengua indígena	Sin hablantes de lengua indígena	Sin hablantes de lengua indígena	Agricultura	NE	NE	NO	NO	NO	NO	NO	Pobreza o marginación	NA	NA	NA	NA	NA	NA	NA	NA	NA	NA	NA	NA	NA	NA	NA	NA	NA	NA	NA
12	Guerrero	003	Ajuchitlán del Progreso	0256	Arroyo Zarco	1003305	175521	1114	Terracería	Conexa a carretera	Disponibilidad de transporte NE	Disponibilidad de transporte NE	Disponibilidad de transporte NE	Disponibilidad de transporte NE	Sin hablantes de lengua indígena	Sin hablantes de lengua indígena	Sin hablantes de lengua indígena	Sin hablantes de lengua indígena	Sin hablantes de lengua indígena	Sin hablantes de lengua indígena	Sin hablantes de lengua indígena	Agricultura	NE	NE	NO	NO	NO	NO	NO	Pobreza o marginación	NA	NA	NA	NA	NA	NA	NA	NA	NA	NA	NA	NA	NA	NA	NA	NA	NA	NA	NA
12	Guerrero	003	Ajuchitlán del Progreso	0263	El Comedor del Crucero	1003317	173450	2254	Terracería	Conexa a carretera	Disponibilidad de transporte NE	Disponibilidad de transporte NE	Disponibilidad de transporte NE	Disponibilidad de transporte NE	Sin hablantes de lengua indígena	Sin hablantes de lengua indígena	Sin hablantes de lengua indígena	Sin hablantes de lengua indígena	Sin hablantes de lengua indígena	Sin hablantes de lengua indígena	Sin hablantes de lengua indígena	Agricultura	NE	NE	NO	NO	NO	NO	NO	Pobreza o marginación	NA	NA	NA	NA	NA	NA	NA	NA	NA	NA	NA	NA	NA	NA	NA	NA	NA	NA	NA
12	Guerrero	003	Ajuchitlán del Progreso	0264	Los Horcones	1003837	174316	2380	Terracería	Conexa a carretera	No hay transporte	No hay transporte	No hay transporte	No hay transporte	Sin hablantes de lengua indígena	Sin hablantes de lengua indígena	Sin hablantes de lengua indígena	Sin hablantes de lengua indígena	Sin hablantes de lengua indígena	Sin hablantes de lengua indígena	Sin hablantes de lengua indígena	Cría y explotación de animales	Agricultura	NE	NO	NO	NO	NO	SI	Falta de equipamiento o servicios para la educación	NA	NA	NA	NA	NA	NA	NA	NA	NA	NA	NA	NA	NA	NA	NA	NA	NA	NA	NA
12	Guerrero	003	Ajuchitlán del Progreso	0266	Entrada de Puerto Rico	1003825	174018	1904	Terracería	Conexa a carretera	No hay transporte	No hay transporte	No hay transporte	No hay transporte	Con hablantes de lengua indígena	Náhuatl	SI	NE	NE	NE	NE	Agricultura	NE	NE	SI	NO	SI	NO	SI	Alcoholismo o drogadicción	NA	NA	NA	NA	NA	NA	NA	NA	NA	NA	NA	NA	NA	NA	NA	NA	NA	NA	NA
12	Guerrero	003	Ajuchitlán del Progreso	0270	Mesas Altas	1003730	174615	1662	Terracería	Conexa a carretera	Disponibilidad de transporte NE	Disponibilidad de transporte NE	Disponibilidad de transporte NE	Disponibilidad de transporte NE	Sin hablantes de lengua indígena	Sin hablantes de lengua indígena	Sin hablantes de lengua indígena	Sin hablantes de lengua indígena	Sin hablantes de lengua indígena	Sin hablantes de lengua indígena	Sin hablantes de lengua indígena	Agricultura	NE	NE	NO	NO	NO	NO	NO	Pobreza o marginación	NA	NA	NA	NA	NA	NA	NA	NA	NA	NA	NA	NA	NA	NA	NA	NA	NA	NA	NA
12	Guerrero	004	Alcozauca de Guerrero	0001	Alcozauca de Guerrero	0982303	172740	1337	Terracería	Conexa a carretera	Es cabecera	Es cabecera	Es cabecera	Es cabecera	Con hablantes de lengua indígena	Mixteco	SI	SI	NO	SI	SI	Agricultura	Trabajos de albañilería de instalaciones hidrosanitarias y eléctricas y de trabajos en exteriores	NE	SI	SI	SI	SI	SI	Falta de infraestructura o servicio de agua	SI	Disponible con cobro	SI	Disponible con desalojo a planta de tratamiento	SI	SI	Entierran la basura	SI	SI	NO	SI	SI	SI	SI	SI	SI	SI	SI	SI
12	Guerrero	004	Alcozauca de Guerrero	0002	Acametla de Bravo	0982140	172302	1899	Terracería	Conexa a carretera	Micro, combi o camioneta	De 30 a 60 min	De 1 a 5 salidas al día	De 30 a 34 pesos	Con hablantes de lengua indígena	Mixteco	SI	SI	SI	SI	SI	Agricultura	Cría y explotación de animales	NE	NO	NO	NO	NO	SI	Falta de carretera o transporte	NO	Red de agua no disponible	SI	Disponible con desalojo a otro lugar	NO	NO	No hay recolección	SI	SI	SI	NO	SI	NO	NO	SI	NO	NO	NO	SI
12	Guerrero	004	Alcozauca de Guerrero	0003	Ahuejutla	0982700	172926	1657	Terracería	Conexa a carretera	Micro, combi o camioneta	De 30 a 60 min	De 1 a 5 salidas al día	De 30 a 34 pesos	Con hablantes de lengua indígena	Mixteco	SI	SI	NO	SI	SI	Agricultura	Cría y explotación de animales	Agricultura	NO	NO	NO	NO	NO	Falta de empleo o emigración	NE	Disponibilidad de red de agua NE	NE	Disponibilidad NE	NE	NE	Recolección y limpieza NE	NE	NE	NE	NE	NE	NE	NE	NE	NE	NE	NE	NE
12	Guerrero	004	Alcozauca de Guerrero	0004	Almolonga de Ocampo (Almolonga)	0982117	172513	1453	Terracería	Conexa a carretera	Micro, combi o camioneta	De 10 a 14 min	De 1 a 5 salidas al día	De 10 a 14 pesos	Con hablantes de lengua indígena	Mixteco	SI	SI	SI	SI	SI	Agricultura	NE	NE	SI	NO	SI	SI	SI	No especificado	SI	Disponible sin cobro	NE	Disponibilidad NE	NO	NO	No hay recolección	SI	SI	NO	NO	SI	NO	NO	SI	SI	NO	NO	SI
12	Guerrero	004	Alcozauca de Guerrero	0005	Altamira	0982117	172146	1972	Terracería	Conexa a carretera	Micro, combi o camioneta	Más de 1 y hasta 1.5 horas	De 1 a 5 salidas al día	De 40 a 49 pesos	Con hablantes de lengua indígena	Mixteco	SI	SI	NO	SI	SI	Agricultura	Cría y explotación de animales	NE	NO	NO	NO	NO	SI	Falta de carretera o transporte	NA	NA	NA	NA	NA	NA	NA	NA	NA	NA	NA	NA	NA	NA	NA	NA	NA	NA	NA
12	Guerrero	004	Alcozauca de Guerrero	0006	Amapilca	0982300	172957	1264	Terracería	Conexa a carretera	Micro, combi o camioneta	DE 15 A 19 MIN	De 1 a 5 salidas al día	De 3 a 6 pesos	Con hablantes de lengua indígena	Mixteco	SI	SI	SI	SI	SI	Agricultura	Cría y explotación de animales	Agricultura	NO	NO	NO	NO	NO	Falta de empleo o emigración	NE	Disponibilidad de red de agua NE	NE	Disponibilidad NE	NE	NE	Recolección y limpieza NE	NE	NE	NE	NE	NE	NE	NE	NE	NE	NE	NE	NE
12	Guerrero	004	Alcozauca de Guerrero	0007	Buena Vista	0981846	172008	2220	Terracería	Conexa a carretera	No hay transporte	No hay transporte	No hay transporte	No hay transporte	Con hablantes de lengua indígena	Mixteco	SI	SI	SI	SI	SI	Agricultura	Cría y explotación de animales	NE	SI	NO	NO	NO	SI	Falta de carretera o transporte	NE	Disponibilidad de red de agua NE	NE	Disponibilidad NE	NE	NE	Recolección y limpieza NE	NE	NE	NE	NE	NE	NE	NE	NE	NE	NE	NE	NE
12	Guerrero	004	Alcozauca de Guerrero	0008	Cerro Azul	0982256	172556	1695	Terracería	Conexa a carretera	No hay transporte	No hay transporte	No hay transporte	No hay transporte	Con hablantes de lengua indígena	Mixteco	SI	SI	NO	SI	SI	Agricultura	Cría y explotación de animales	NE	NO	NO	NO	NO	NO	Falta de empleo o emigración	NA	NA	NA	NA	NA	NA	NA	NA	NA	NA	NA	NA	NA	NA	NA	NA	NA	NA	NA
12	Guerrero	004	Alcozauca de Guerrero	0009	Cuyuxtlahuac	0982037	172856	1691	Terracería	Conexa a carretera	Micro, combi o camioneta	De 30 a 60 min	De 1 a 5 salidas al día	De 25 a 29 pesos	Con hablantes de lengua indígena	Mixteco	SI	SI	SI	SI	SI	Agricultura	Cría y explotación de animales	Fabricación de prendas de vestir	NO	SI	NO	NO	NO	Falta de empleo o emigración	NO	Red de agua no disponible	SI	Disponible con desalojo a planta de tratamiento	NO	NO	No hay recolección	SI	SI	NO	NO	SI	SI	NO	SI	SI	NO	NO	SI
12	Guerrero	004	Alcozauca de Guerrero	0010	Chimaltepec	0982229	172356	1900	Terracería	Conexa a carretera	Micro, combi o camioneta	De 30 a 60 min	De 1 a 5 salidas al día	De 25 a 29 pesos	Con hablantes de lengua indígena	Mixteco	SI	SI	SI	SI	SI	Agricultura	Fabricación de prendas de vestir	Cría y explotación de animales	NO	NO	NO	NO	NO	Falta de infraestructura o servicio de agua	NO	Red de agua no disponible	NO	Red de drenaje no disponible	NO	NE	No hay recolección	SI	NE	NE	NE	NE	SI	NO	NO	SI	NO	NO	SI
12	Guerrero	004	Alcozauca de Guerrero	0011	Ixcuinatoyac	0982033	172210	1602	Terracería	Conexa a carretera	Micro, combi o camioneta	Tiempo de traslado NE	De 1 a 5 salidas al día	De 25 a 29 pesos	Con hablantes de lengua indígena	Mixteco	SI	SI	NO	SI	SI	Agricultura	NE	NE	SI	NO	SI	NO	SI	Irregularidad o disputa relacionada con la tenencia de la tierra	NO	Red de agua no disponible	SI	Disponible con desalojo a planta de tratamiento	NO	NO	No hay recolección	NO	SI	NO	NO	SI	SI	NO	SI	SI	NO	NO	SI
12	Guerrero	004	Alcozauca de Guerrero	0012	Lomazóyatl (Lomazoya)	0982738	172115	1644	Pavimentada	Conexa a carretera	No hay transporte	No hay transporte	No hay transporte	No hay transporte	Con hablantes de lengua indígena	Mixteco	SI	SI	SI	SI	SI	Agricultura	NE	NE	SI	NO	NO	NO	SI	Falta de empleo o emigración	SI	Disponible sin cobro	SI	Disponible con desalojo a planta de tratamiento	NO	NO	No hay recolección	SI	NO	NO	SI	SI	SI	NO	NO	SI	NO	SI	SI
12	Guerrero	004	Alcozauca de Guerrero	0013	Melchor Ocampo	0982650	172133	1584	Terracería	Conexa a carretera	No hay transporte	No hay transporte	No hay transporte	No hay transporte	Con hablantes de lengua indígena	Mixteco	SI	SI	SI	SI	SI	Agricultura	NE	NE	SI	NO	NO	NO	SI	Falta de empleo o emigración	NO	Red de agua no disponible	SI	Disponible con desalojo a planta de tratamiento	NO	NO	No hay recolección	SI	NO	SI	NO	SI	NO	NO	NO	SI	NO	NO	SI
12	Guerrero	004	Alcozauca de Guerrero	0014	Petlacalancingo	0982930	172226	1374	Terracería	Conexa a carretera	No hay transporte	No hay transporte	No hay transporte	No hay transporte	Con hablantes de lengua indígena	Mixteco	SI	SI	NO	SI	SI	Agricultura	NE	NE	SI	NO	SI	NO	SI	Falta de empleo o emigración	SI	Disponible con cobro	SI	Disponible con desalojo a planta de tratamiento	NO	NO	No hay recolección	SI	NO	NO	NO	SI	NO	NO	NO	SI	NO	NO	SI
12	Guerrero	004	Alcozauca de Guerrero	0015	San José Lagunas (Capulín)	0982719	172614	1785	Terracería	Conexa a carretera	Camión de redilas o troca	De 30 a 60 min	De 1 a 5 salidas al día	De 25 a 29 pesos	Con hablantes de lengua indígena	Mixteco	SI	NO	NO	SI	SI	Agricultura	NE	NE	NO	SI	SI	NO	NO	Falta de empleo o emigración	NO	Red de agua no disponible	SI	Disponible con desalojo a grieta o barranca	SI	NE	Queman la basura	SI	SI	SI	SI	SI	SI	NO	NO	SI	NO	SI	SI
12	Guerrero	004	Alcozauca de Guerrero	0016	San Miguel el Grande	0981413	171437	1718	Terracería	Conexa a carretera	Camión de redilas o troca	Más de 3 y hasta 4 horas	De 1 a 5 salidas al día	De 100 a 119 pesos	Con hablantes de lengua indígena	Mixteco	SI	SI	SI	SI	SI	Agricultura	NE	NE	NO	NO	NO	NO	NO	Pobreza o marginación	NO	Red de agua no disponible	NO	Red de drenaje no disponible	NE	NO	No hay recolección	SI	NO	SI	NO	SI	SI	NO	NO	SI	NO	NO	SI
12	Guerrero	004	Alcozauca de Guerrero	0017	Tlahuapa	0982015	172230	1608	Terracería	Conexa a carretera	Micro, combi o camioneta	De 30 a 60 min	De 1 a 5 salidas al día	De 20 a 24 pesos	Con hablantes de lengua indígena	Mixteco	SI	SI	SI	SI	SI	Agricultura	NE	NE	SI	NO	NO	NO	SI	Falta de empleo o emigración	SI	Disponible sin cobro	SI	Disponible con desalojo a planta de tratamiento	NO	NO	No hay recolección	NO	SI	NO	NO	SI	SI	NO	NO	SI	NO	NO	SI
12	Guerrero	004	Alcozauca de Guerrero	0018	Xochapa	0982703	172257	1428	Pavimentada	Conexa a carretera	No hay transporte	No hay transporte	No hay transporte	No hay transporte	Con hablantes de lengua indígena	Mixteco	SI	SI	SI	SI	SI	Agricultura	Cría y explotación de animales	NE	SI	SI	SI	NO	SI	Pobreza o marginación	NO	Red de agua no disponible	SI	Disponible con desalojo a planta de tratamiento	NO	NE	No hay recolección	SI	NO	SI	NO	SI	NO	SI	NO	SI	NO	NO	SI
12	Guerrero	004	Alcozauca de Guerrero	0019	Xonacatlán	0982445	173008	1687	Terracería	Conexa a carretera	Camión de redilas o troca	De 30 a 60 min	De 1 a 5 salidas al día	De 25 a 29 pesos	Con hablantes de lengua indígena	Mixteco	SI	NO	NO	SI	SI	Agricultura	NE	NE	NO	NO	SI	NO	NO	Falta de empleo o emigración	SI	Disponible con cobro	SI	Disponible con desalojo a otro lugar	SI	NE	Queman la basura	SI	SI	SI	NO	SI	SI	NO	NO	SI	NO	NO	SI
12	Guerrero	004	Alcozauca de Guerrero	0020	San Vicente Zoyatlán	0982151	171921	2039	Terracería	Conexa a carretera	Micro, combi o camioneta	Más de 1.5 y hasta 2 horas	Frecuencia NE	Costo NE	Con hablantes de lengua indígena	Mixteco	SI	SI	SI	SI	SI	Agricultura	NE	NE	NO	NO	SI	NO	NO	No especificado	NO	Red de agua no disponible	NO	Red de drenaje no disponible	NE	NO	No hay recolección	SI	NO	SI	NO	SI	SI	SI	NO	SI	NO	NO	SI
12	Guerrero	004	Alcozauca de Guerrero	0021	Zaragoza	0982250	171819	2433	Terracería	Conexa a carretera	No hay transporte	No hay transporte	No hay transporte	No hay transporte	Con hablantes de lengua indígena	Mixteco	SI	SI	SI	SI	SI	Agricultura	NE	NE	NO	NO	NO	NO	NO	Pobreza o marginación	NA	NA	NA	NA	NA	NA	NA	NA	NA	NA	NA	NA	NA	NA	NA	NA	NA	NA	NA
12	Guerrero	004	Alcozauca de Guerrero	0022	San Martín	0982016	171853	2108	Terracería	Conexa a carretera	Disponibilidad de transporte NE	Disponibilidad de transporte NE	Disponibilidad de transporte NE	Disponibilidad de transporte NE	Con hablantes de lengua indígena	Mixteco	SI	SI	SI	SI	SI	Agricultura	NE	NE	SI	NO	NO	NO	NO	Pobreza o marginación	NA	NA	NA	NA	NA	NA	NA	NA	NA	NA	NA	NA	NA	NA	NA	NA	NA	NA	NA
12	Guerrero	004	Alcozauca de Guerrero	0023	El Gitano	0982624	171940	1956	Pavimentada	Conexa a carretera	No hay transporte	No hay transporte	No hay transporte	No hay transporte	Con hablantes de lengua indígena	Mixteco	SI	SI	SI	SI	SI	Agricultura	NE	NE	NO	NO	NO	NO	SI	Falta de empleo o emigración	NA	NA	NA	NA	NA	NA	NA	NA	NA	NA	NA	NA	NA	NA	NA	NA	NA	NA	NA
12	Guerrero	004	Alcozauca de Guerrero	0024	Cruz Verde	0982216	172016	2144	Terracería	Conexa a carretera	Micro, combi o camioneta	De 30 a 60 min	De 1 a 5 salidas al día	De 60 a 74 pesos	Con hablantes de lengua indígena	Mixteco	SI	SI	SI	SI	SI	Agricultura	NE	NE	NO	NO	NO	NO	NO	Pobreza o marginación	NA	NA	NA	NA	NA	NA	NA	NA	NA	NA	NA	NA	NA	NA	NA	NA	NA	NA	NA
12	Guerrero	004	Alcozauca de Guerrero	0025	Pueblo de Dios	0982009	172749	1945	Terracería	Conexa a carretera	Disponibilidad de transporte NE	Disponibilidad de transporte NE	Disponibilidad de transporte NE	Disponibilidad de transporte NE	Con hablantes de lengua indígena	Mixteco	SI	SI	SI	SI	SI	Agricultura	Fabricación de prendas de vestir	Fabricación de productos a base de minerales no metálicos	SI	SI	NO	NO	NO	No especificado	NE	Disponibilidad de red de agua NE	NE	Disponibilidad NE	NE	NE	Recolección y limpieza NE	NE	NE	NE	NE	NE	NE	NE	NE	NE	NE	NE	NE
12	Guerrero	004	Alcozauca de Guerrero	0026	Rancho el Zapote	0982111	172433	1456	Terracería	Conexa a carretera	Micro, combi o camioneta	De 30 a 60 min	Sin salidas diarias	De 10 a 14 pesos	Con hablantes de lengua indígena	Mixteco	SI	NE	NE	NE	NE	Agricultura	NE	NE	SI	NO	NO	NO	NO	Falta de empleo o emigración	NA	NA	NA	NA	NA	NA	NA	NA	NA	NA	NA	NA	NA	NA	NA	NA	NA	NA	NA
12	Guerrero	004	Alcozauca de Guerrero	0029	Colonia Loma Bonita San Miguel el Grande	0981316	171344	1648	Terracería	Conexa a carretera	Micro, combi o camioneta	Más de 4 horas	De 1 a 5 salidas al día	De 100 a 119 pesos	Con hablantes de lengua indígena	Mixteco	SI	SI	SI	SI	SI	Agricultura	NE	NE	NO	NO	NO	NO	NO	Pobreza o marginación	NA	NA	NA	NA	NA	NA	NA	NA	NA	NA	NA	NA	NA	NA	NA	NA	NA	NA	NA
12	Guerrero	004	Alcozauca de Guerrero	0033	Benito Abraham Villanueva	0982319	172828	1298	Terracería	Conexa a carretera	No hay transporte	No hay transporte	No hay transporte	No hay transporte	Con hablantes de lengua indígena	Mixteco	SI	NO	NO	SI	NO	Agricultura	Agricultura	NE	NO	NO	NO	NO	NO	Falta de infraestructura o servicio de agua	NA	NA	NA	NA	NA	NA	NA	NA	NA	NA	NA	NA	NA	NA	NA	NA	NA	NA	NA
12	Guerrero	004	Alcozauca de Guerrero	0036	Ninguno	0982646	172104	1573	Terracería	Conexa a carretera	No hay transporte	No hay transporte	No hay transporte	No hay transporte	Con hablantes de lengua indígena	Mixteco	SI	NO	NO	NO	NO	Agricultura	NE	NE	NO	NO	NO	NO	SI	Falta de empleo o emigración	NA	NA	NA	NA	NA	NA	NA	NA	NA	NA	NA	NA	NA	NA	NA	NA	NA	NA	NA
12	Guerrero	004	Alcozauca de Guerrero	0038	Colonia el Arenal	0982057	171917	2050	Terracería	Conexa a carretera	Micro, combi o camioneta	Más de 2 y hasta 3 horas	De 1 a 5 salidas al día	De 100 a 119 pesos	Con hablantes de lengua indígena	Mixteco	SI	SI	SI	SI	SI	Agricultura	NE	NE	NO	NO	NO	NO	NO	Pobreza o marginación	NA	NA	NA	NA	NA	NA	NA	NA	NA	NA	NA	NA	NA	NA	NA	NA	NA	NA	NA
12	Guerrero	004	Alcozauca de Guerrero	0039	Nuevo Zaragoza	0982325	171803	2597	NDAI	NDAI	NDAI	NDAI	NDAI	NDAI	NDAI	NDAI	NDAI	NDAI	NDAI	NDAI	NDAI	NDAI	NDAI	NDAI	NDAI	NDAI	NDAI	NDAI	NDAI	No especificado	NA	NA	NA	NA	NA	NA	NA	NA	NA	NA	NA	NA	NA	NA	NA	NA	NA	NA	NA
12	Guerrero	005	Alpoyeca	0001	Alpoyeca	0983037	174017	0965	Pavimentada	Conexa a carretera	Es cabecera	Es cabecera	Es cabecera	Es cabecera	Con hablantes de lengua indígena	Mixteco	SI	NO	NO	NO	NO	Agricultura	Cría y explotación de animales	NE	NO	SI	SI	SI	SI	Delincuencia o inseguridad	SI	Disponible con cobro	NO	Red de drenaje no disponible	SI	SI	Depositan la basura a cielo abierto	SI	SI	NO	SI	SI	SI	SI	SI	SI	SI	SI	SI
12	Guerrero	005	Alpoyeca	0002	Ixcateopan	0983057	173707	0992	Pavimentada	Conexa a carretera	Micro, combi o camioneta	De 10 a 14 min	Más de 60 salidas	De 7 a 9 pesos	Sin hablantes de lengua indígena	Sin hablantes de lengua indígena	Sin hablantes de lengua indígena	Sin hablantes de lengua indígena	Sin hablantes de lengua indígena	Sin hablantes de lengua indígena	Sin hablantes de lengua indígena	Agricultura	NE	NE	NO	NO	NO	NO	NO	Falta de apoyo o deficiencia gubernamental	SI	Disponible con cobro	NO	Red de drenaje no disponible	NE	SI	Queman la basura	SI	SI	NO	SI	SI	SI	SI	NO	SI	NO	NO	SI
12	Guerrero	005	Alpoyeca	0003	San José Buenavista	0983133	174024	0939	Pavimentada	Conexa a carretera	No hay transporte	No hay transporte	No hay transporte	No hay transporte	Con hablantes de lengua indígena	Náhuatl	SI	NO	NO	NO	SI	Agricultura	NE	NE	NO	NO	SI	NO	NO	Falta de drenaje y alcantarillado	SI	Disponible con cobro NE	NO	Red de drenaje no disponible	NO	SI	Queman la basura	SI	SI	SI	SI	SI	SI	NO	NO	SI	SI	SI	SI
12	Guerrero	005	Alpoyeca	0004	Tecoyo	0982911	173533	1019	Pavimentada	Conexa a carretera	Micro, combi o camioneta	De 20 a 24 min	De 1 a 5 salidas al día	De 25 a 29 pesos	Sin hablantes de lengua indígena	Sin hablantes de lengua indígena	Sin hablantes de lengua indígena	Sin hablantes de lengua indígena	Sin hablantes de lengua indígena	Sin hablantes de lengua indígena	Sin hablantes de lengua indígena	Agricultura	NE	NE	NO	SI	NO	NO	NO	Falta de empleo o emigración	SI	Disponible con cobro	NO	Red de drenaje no disponible	SI	NO	Destino NE	SI	SI	SI	NO	SI	SI	NO	NO	SI	NO	NO	SI
12	Guerrero	006	Apaxtla	0003	Los Amates	0995907	175917	0915	Pavimentada	Conexa a carretera	Micro, combi o camioneta	De 30 a 60 min	De 1 a 5 salidas al día	De 75 a 99 pesos	Sin hablantes de lengua indígena	Sin hablantes de lengua indígena	Sin hablantes de lengua indígena	Sin hablantes de lengua indígena	Sin hablantes de lengua indígena	Sin hablantes de lengua indígena	Sin hablantes de lengua indígena	Agricultura	Cría y explotación de animales	NE	NO	NO	NO	NO	NO	Falta de infraestructura o servicio de agua	NA	NA	NA	NA	NA	NA	NA	NA	NA	NA	NA	NA	NA	NA	NA	NA	NA	NA	NA
12	Guerrero	006	Apaxtla	0005	Cacalotepec	1000032	180250	1439	Terracería	Conexa a carretera	Micro, combi o camioneta	De 30 a 60 min	De 1 a 5 salidas al día	De 15 a 19 pesos	Sin hablantes de lengua indígena	Sin hablantes de lengua indígena	Sin hablantes de lengua indígena	Sin hablantes de lengua indígena	Sin hablantes de lengua indígena	Sin hablantes de lengua indígena	Sin hablantes de lengua indígena	Agricultura	NE	NE	NO	NO	NO	NO	NO	Falta de infraestructura o servicio de agua	NO	Red de agua no disponible	SI	Disponible con desalojo a grieta o barranca	NO	NO	No hay recolección	SI	SI	NO	NO	SI	SI	NO	SI	SI	NO	NO	SI
12	Guerrero	006	Apaxtla	0009	Colonia Emiliano Zapata II (Cuadrilla Nueva)	0995508	181256	1060	Pavimentada	Conexa a carretera	Micro, combi o camioneta	DE 15 A 19 MIN	De 11 a 20 salidas al día	De 10 a 14 pesos	Sin hablantes de lengua indígena	Sin hablantes de lengua indígena	Sin hablantes de lengua indígena	Sin hablantes de lengua indígena	Sin hablantes de lengua indígena	Sin hablantes de lengua indígena	Sin hablantes de lengua indígena	Agricultura	Cría y explotación de animales	NE	NO	NO	NO	NO	NO	Falta de otros servicios o equipamiento	NA	NA	NA	NA	NA	NA	NA	NA	NA	NA	NA	NA	NA	NA	NA	NA	NA	NA	NA
12	Guerrero	006	Apaxtla	0010	Iglesia Vieja	0995325	180645	1454	Terracería	Conexa a carretera	Micro, combi o camioneta	De 30 a 60 min	De 1 a 5 salidas al día	De 40 a 49 pesos	Sin hablantes de lengua indígena	Sin hablantes de lengua indígena	Sin hablantes de lengua indígena	Sin hablantes de lengua indígena	Sin hablantes de lengua indígena	Sin hablantes de lengua indígena	Sin hablantes de lengua indígena	Agricultura	NE	NE	NO	NO	NO	NO	NO	Falta de infraestructura o servicio de agua	NA	NA	NA	NA	NA	NA	NA	NA	NA	NA	NA	NA	NA	NA	NA	NA	NA	NA	NA
12	Guerrero	006	Apaxtla	0012	Las Juntas	1000416	175919	0366	Terracería	Conexa a carretera	No hay transporte	No hay transporte	No hay transporte	No hay transporte	Sin hablantes de lengua indígena	Sin hablantes de lengua indígena	Sin hablantes de lengua indígena	Sin hablantes de lengua indígena	Sin hablantes de lengua indígena	Sin hablantes de lengua indígena	Sin hablantes de lengua indígena	Agricultura	Cría y explotación de animales	NE	NO	NO	NO	NO	NO	Falta de empleo o emigración	NA	NA	NA	NA	NA	NA	NA	NA	NA	NA	NA	NA	NA	NA	NA	NA	NA	NA	NA
12	Guerrero	006	Apaxtla	0014	Liberaltepec	1000157	181126	1581	Terracería	Conexa a carretera	Micro, combi o camioneta	Más de 1 y hasta 1.5 horas	De 1 a 5 salidas al día	De 25 a 29 pesos	Con hablantes de lengua indígena	Náhuatl	SI	NE	NE	NE	NE	Agricultura	NE	NE	NO	NO	NO	NO	NO	Falta de empleo o emigración	SI	Disponible con cobro	SI	Disponible con desalojo a grieta o barranca	NO	NE	No hay recolección	SI	SI	SI	NO	SI	SI	NO	SI	NO	NO	NO	SI
12	Guerrero	006	Apaxtla	0016	Nejapa	0995415	181059	1456	Terracería	Conexa a carretera	Camión de redilas o troca	De 30 a 60 min	De 1 a 5 salidas al día	De 30 a 34 pesos	Sin hablantes de lengua indígena	Sin hablantes de lengua indígena	Sin hablantes de lengua indígena	Sin hablantes de lengua indígena	Sin hablantes de lengua indígena	Sin hablantes de lengua indígena	Sin hablantes de lengua indígena	Agricultura	Cría y explotación de animales	Pesca	NO	NO	NO	NO	NO	Falta de apoyo o deficiencia gubernamental	NA	NA	NA	NA	NA	NA	NA	NA	NA	NA	NA	NA	NA	NA	NA	NA	NA	NA	NA
12	Guerrero	006	Apaxtla	0017	Petlacala	0995303	181111	1507	Terracería	Conexa a carretera	Micro, combi o camioneta	De 30 a 60 min	De 1 a 5 salidas al día	De 20 a 24 pesos	Sin hablantes de lengua indígena	Sin hablantes de lengua indígena	Sin hablantes de lengua indígena	Sin hablantes de lengua indígena	Sin hablantes de lengua indígena	Sin hablantes de lengua indígena	Sin hablantes de lengua indígena	Agricultura	Cría y explotación de animales	NE	NO	NO	NO	NO	NO	Falta de infraestructura o servicio de agua	SI	Disponible con cobro	NO	Red de drenaje no disponible	NO	NO	No hay recolección	SI	SI	NO	SI	SI	SI	NO	NO	NO	NO	NO	SI
12	Guerrero	006	Apaxtla	0020	San Felipe del Ocote (San Felipe)	1000356	181028	1541	Terracería	Conexa a carretera	Camión de redilas o troca	Más de 1.5 y hasta 2 horas	Sin salidas diarias	De 40 a 49 pesos	Sin hablantes de lengua indígena	Sin hablantes de lengua indígena	Sin hablantes de lengua indígena	Sin hablantes de lengua indígena	Sin hablantes de lengua indígena	Sin hablantes de lengua indígena	Sin hablantes de lengua indígena	Agricultura	Cría y explotación de animales	NE	NO	NO	NO	NO	NO	Falta de infraestructura o servicio de agua	NO	Red de agua no disponible	NO	Red de drenaje no disponible	NO	NO	No hay recolección	SI	SI	SI	NO	NO	SI	NO	SI	SI	NO	NO	SI
12	Guerrero	006	Apaxtla	0021	San Marcos	1000123	175836	0450	Pavimentada	Conexa a carretera	Micro, combi o camioneta	De 30 a 60 min	De 1 a 5 salidas al día	De 120 a 149 pesos	Sin hablantes de lengua indígena	Sin hablantes de lengua indígena	Sin hablantes de lengua indígena	Sin hablantes de lengua indígena	Sin hablantes de lengua indígena	Sin hablantes de lengua indígena	Sin hablantes de lengua indígena	Agricultura	Pesca	Cría y explotación de animales	NO	NO	NO	NO	NO	Falta de empleo o emigración	NA	NA	NA	NA	NA	NA	NA	NA	NA	NA	NA	NA	NA	NA	NA	NA	NA	NA	NA
12	Guerrero	006	Apaxtla	0022	San Pedro	1000426	181238	1386	Terracería	Conexa a carretera	No hay transporte	No hay transporte	No hay transporte	No hay transporte	Sin hablantes de lengua indígena	Sin hablantes de lengua indígena	Sin hablantes de lengua indígena	Sin hablantes de lengua indígena	Sin hablantes de lengua indígena	Sin hablantes de lengua indígena	Sin hablantes de lengua indígena	Agricultura	Cría y explotación de animales	NE	NO	NO	NO	NO	NO	Falta de infraestructura o servicio de agua	NA	NA	NA	NA	NA	NA	NA	NA	NA	NA	NA	NA	NA	NA	NA	NA	NA	NA	NA
12	Guerrero	006	Apaxtla	0025	Tepoxtepec (Tepoztepec)	0995322	180857	1326	Terracería	Conexa a carretera	Micro, combi o camioneta	De 30 a 60 min	De 1 a 5 salidas al día	De 20 a 24 pesos	Sin hablantes de lengua indígena	Sin hablantes de lengua indígena	Sin hablantes de lengua indígena	Sin hablantes de lengua indígena	Sin hablantes de lengua indígena	Sin hablantes de lengua indígena	Sin hablantes de lengua indígena	Agricultura	Cría y explotación de animales	NE	NO	NO	NO	NO	NO	Falta de equipamiento o servicios para la educación	SI	Disponible sin cobro	SI	Disponible con desalojo a grieta o barranca	NO	NE	No hay recolección	SI	SI	SI	NO	SI	SI	NO	SI	SI	NO	NO	SI
12	Guerrero	006	Apaxtla	0026	Texocotla	0995511	180119	0900	Terracería	Conexa a carretera	No hay transporte	No hay transporte	No hay transporte	No hay transporte	Sin hablantes de lengua indígena	Sin hablantes de lengua indígena	Sin hablantes de lengua indígena	Sin hablantes de lengua indígena	Sin hablantes de lengua indígena	Sin hablantes de lengua indígena	Sin hablantes de lengua indígena	Agricultura	Cría y explotación de animales	NE	NO	NO	NO	NO	NO	Falta de equipamiento o servicios de salud	NA	NA	NA	NA	NA	NA	NA	NA	NA	NA	NA	NA	NA	NA	NA	NA	NA	NA	NA
12	Guerrero	006	Apaxtla	0027	Tlatzala	0995345	180340	1204	Pavimentada	Conexa a carretera	Micro, combi o camioneta	De 30 a 60 min	De 1 a 5 salidas al día	De 10 a 14 pesos	Con hablantes de lengua indígena	Tlapaneco	SI	NO	NO	NO	NO	Agricultura	Cría y explotación de animales	NE	NO	NO	NO	NO	SI	Falta de infraestructura o servicio de agua	NO	Red de agua no disponible	SI	Disponible con desalojo a otro lugar	NE	NO	No hay recolección	SI	SI	NO	SI	SI	SI	NO	SI	SI	NO	NO	SI
12	Guerrero	006	Apaxtla	0028	Trapichal	1000358	180045	0383	Terracería	Conexa a carretera	Camión de redilas o troca	Más de 1 y hasta 1.5 horas	Frecuencia NE	De 150 a 199 pesos	Sin hablantes de lengua indígena	Sin hablantes de lengua indígena	Sin hablantes de lengua indígena	Sin hablantes de lengua indígena	Sin hablantes de lengua indígena	Sin hablantes de lengua indígena	Sin hablantes de lengua indígena	Agricultura	Pesca	Cría y explotación de animales	NO	NO	NO	NO	NO	Falta de empleo o emigración	NA	NA	NA	NA	NA	NA	NA	NA	NA	NA	NA	NA	NA	NA	NA	NA	NA	NA	NA
12	Guerrero	006	Apaxtla	0029	Xochipala	0995922	181336	1581	Terracería	Conexa a carretera	Micro, combi o camioneta	De 30 a 60 min	Sin salidas diarias	De 40 a 49 pesos	Sin hablantes de lengua indígena	Sin hablantes de lengua indígena	Sin hablantes de lengua indígena	Sin hablantes de lengua indígena	Sin hablantes de lengua indígena	Sin hablantes de lengua indígena	Sin hablantes de lengua indígena	Agricultura	Fabricación de productos a base de minerales no metálicos	Cría y explotación de animales	NO	NO	NO	NO	NO	Falta de infraestructura o servicio de agua	NE	Disponibilidad de red de agua NE	NE	Disponibilidad NE	NE	NE	Recolección y limpieza NE	NE	NE	NE	NE	NE	NE	NE	NE	NE	NE	NE	NE
12	Guerrero	006	Apaxtla	0030	Xochitepec	1000529	180553	1129	Terracería	Conexa a carretera	Camión de redilas o troca	Más de 2 y hasta 3 horas	De 1 a 5 salidas al día	De 35 a 39 pesos	Con hablantes de lengua indígena	Náhuatl	SI	NE	NE	NE	NE	Agricultura	Cría y explotación de animales	Otras industrias manufactureras	NO	NO	NO	NO	NO	No especificado	NO	Red de agua no disponible	NO	Red de drenaje no disponible	SI	SI	Queman la basura	SI	SI	SI	NO	SI	SI	SI	SI	SI	NO	NO	SI
12	Guerrero	006	Apaxtla	0031	Zacapostepec	0995734	180109	1248	Terracería	Conexa a carretera	Micro, combi o camioneta	De 30 a 60 min	De 1 a 5 salidas al día	De 120 a 149 pesos	Sin hablantes de lengua indígena	Sin hablantes de lengua indígena	Sin hablantes de lengua indígena	Sin hablantes de lengua indígena	Sin hablantes de lengua indígena	Sin hablantes de lengua indígena	Sin hablantes de lengua indígena	Agricultura	Cría y explotación de animales	NE	NO	NO	NO	NO	NO	Falta de empleo o emigración	SI	Disponible con cobro	SI	Disponible con desalojo a un cuerpo de agua	NO	SI	Depositan la basura a cielo abierto	SI	SI	SI	SI	SI	NO	SI	NO	SI	NO	NO	SI
12	Guerrero	006	Apaxtla	0035	El Muñeco	0995522	180728	1299	Terracería	Conexa a carretera	Taxi	De 20 a 24 min	Sin salidas diarias	De 20 a 24 pesos	Sin hablantes de lengua indígena	Sin hablantes de lengua indígena	Sin hablantes de lengua indígena	Sin hablantes de lengua indígena	Sin hablantes de lengua indígena	Sin hablantes de lengua indígena	Sin hablantes de lengua indígena	Agricultura	NE	NE	NO	NO	NO	NO	NO	Falta de empleo o emigración	NA	NA	NA	NA	NA	NA	NA	NA	NA	NA	NA	NA	NA	NA	NA	NA	NA	NA	NA
12	Guerrero	006	Apaxtla	0037	El Remolino	1000252	175806	0403	Terracería	Conexa a carretera	Camión de redilas o troca	Más de 1.5 y hasta 2 horas	De 1 a 5 salidas al día	De 120 a 149 pesos	Sin hablantes de lengua indígena	Sin hablantes de lengua indígena	Sin hablantes de lengua indígena	Sin hablantes de lengua indígena	Sin hablantes de lengua indígena	Sin hablantes de lengua indígena	Sin hablantes de lengua indígena	Agricultura	Pesca	Cría y explotación de animales	NO	NO	NO	NO	NO	No especificado	NA	NA	NA	NA	NA	NA	NA	NA	NA	NA	NA	NA	NA	NA	NA	NA	NA	NA	NA
12	Guerrero	006	Apaxtla	0040	San Gaspar	1000345	180315	0598	Terracería	Conexa a carretera	Camión de redilas o troca	Más de 1.5 y hasta 2 horas	De 1 a 5 salidas al día	De 35 a 39 pesos	Sin hablantes de lengua indígena	Sin hablantes de lengua indígena	Sin hablantes de lengua indígena	Sin hablantes de lengua indígena	Sin hablantes de lengua indígena	Sin hablantes de lengua indígena	Sin hablantes de lengua indígena	Agricultura	Cría y explotación de animales	NE	NO	NO	NO	NO	NO	Falta de energía eléctrica	NA	NA	NA	NA	NA	NA	NA	NA	NA	NA	NA	NA	NA	NA	NA	NA	NA	NA	NA
12	Guerrero	006	Apaxtla	0043	El Querengue	0995414	175934	0894	Terracería	Conexa a carretera	Micro, combi o camioneta	Más de 1 y hasta 1.5 horas	De 1 a 5 salidas al día	De 75 a 99 pesos	Sin hablantes de lengua indígena	Sin hablantes de lengua indígena	Sin hablantes de lengua indígena	Sin hablantes de lengua indígena	Sin hablantes de lengua indígena	Sin hablantes de lengua indígena	Sin hablantes de lengua indígena	Agricultura	Pesca	Cría y explotación de animales	NO	NO	NO	NO	NO	Falta de energía eléctrica	NA	NA	NA	NA	NA	NA	NA	NA	NA	NA	NA	NA	NA	NA	NA	NA	NA	NA	NA
12	Guerrero	006	Apaxtla	0044	Corral Grande	0995412	175802	0487	NE	Conexión a carretera NE	Disponibilidad de transporte NE	Disponibilidad de transporte NE	Disponibilidad de transporte NE	Disponibilidad de transporte NE	NE	Hablantes de lengua indígena NE	Hablantes de lengua indígena NE	Hablantes de lengua indígena NE	Hablantes de lengua indígena NE	Hablantes de lengua indígena NE	Hablantes de lengua indígena NE	NE	NE	NE	NE	NE	NE	NE	NE	No especificado	NA	NA	NA	NA	NA	NA	NA	NA	NA	NA	NA	NA	NA	NA	NA	NA	NA	NA	NA
12	Guerrero	006	Apaxtla	0045	La Papaya	1000122	180000	0591	No conexa a carretera	De 4 a 10 km	No hay transporte	No hay transporte	No hay transporte	No hay transporte	Sin hablantes de lengua indígena	Sin hablantes de lengua indígena	Sin hablantes de lengua indígena	Sin hablantes de lengua indígena	Sin hablantes de lengua indígena	Sin hablantes de lengua indígena	Sin hablantes de lengua indígena	Agricultura	NE	NE	NO	NO	NO	NO	NO	Falta de empleo o emigración	NA	NA	NA	NA	NA	NA	NA	NA	NA	NA	NA	NA	NA	NA	NA	NA	NA	NA	NA
12	Guerrero	006	Apaxtla	0054	El Aguacate	1000151	180211	1095	NE	Conexión a carretera NE	Disponibilidad de transporte NE	Disponibilidad de transporte NE	Disponibilidad de transporte NE	Disponibilidad de transporte NE	NE	Hablantes de lengua indígena NE	Hablantes de lengua indígena NE	Hablantes de lengua indígena NE	Hablantes de lengua indígena NE	Hablantes de lengua indígena NE	Hablantes de lengua indígena NE	NE	NE	NE	NE	NE	NE	NE	NE	No especificado	NA	NA	NA	NA	NA	NA	NA	NA	NA	NA	NA	NA	NA	NA	NA	NA	NA	NA	NA
12	Guerrero	006	Apaxtla	0059	Laguna del Tigre	0995459	180955	1417	Terracería	Conexa a carretera	Micro, combi o camioneta	De 20 a 24 min	De 1 a 5 salidas al día	De 10 a 14 pesos	Sin hablantes de lengua indígena	Sin hablantes de lengua indígena	Sin hablantes de lengua indígena	Sin hablantes de lengua indígena	Sin hablantes de lengua indígena	Sin hablantes de lengua indígena	Sin hablantes de lengua indígena	Agricultura	Cría y explotación de animales	NE	NO	NO	NO	NO	NO	Otra clase de problema	NA	NA	NA	NA	NA	NA	NA	NA	NA	NA	NA	NA	NA	NA	NA	NA	NA	NA	NA
12	Guerrero	006	Apaxtla	0062	El Naranjo	1000108	175733	0400	Pavimentada	Conexa a carretera	Micro, combi o camioneta	De 30 a 60 min	De 1 a 5 salidas al día	De 40 a 49 pesos	Sin hablantes de lengua indígena	Sin hablantes de lengua indígena	Sin hablantes de lengua indígena	Sin hablantes de lengua indígena	Sin hablantes de lengua indígena	Sin hablantes de lengua indígena	Sin hablantes de lengua indígena	Agricultura	Cría y explotación de animales	Pesca	NO	NO	NO	NO	NO	Falta de empleo o emigración	NA	NA	NA	NA	NA	NA	NA	NA	NA	NA	NA	NA	NA	NA	NA	NA	NA	NA	NA
12	Guerrero	006	Apaxtla	0063	La Lagunita	0995453	175808	0614	Terracería	Conexa a carretera	Micro, combi o camioneta	Más de 1.5 y hasta 2 horas	De 1 a 5 salidas al día	De 75 a 99 pesos	Sin hablantes de lengua indígena	Sin hablantes de lengua indígena	Sin hablantes de lengua indígena	Sin hablantes de lengua indígena	Sin hablantes de lengua indígena	Sin hablantes de lengua indígena	Sin hablantes de lengua indígena	Agricultura	Pesca	NE	NO	NO	NO	NO	NO	Falta de energía eléctrica	NA	NA	NA	NA	NA	NA	NA	NA	NA	NA	NA	NA	NA	NA	NA	NA	NA	NA	NA
12	Guerrero	006	Apaxtla	0066	El Rincón	1000117	180103	0876	NE	Conexión a carretera NE	Disponibilidad de transporte NE	Disponibilidad de transporte NE	Disponibilidad de transporte NE	Disponibilidad de transporte NE	NE	Hablantes de lengua indígena NE	Hablantes de lengua indígena NE	Hablantes de lengua indígena NE	Hablantes de lengua indígena NE	Hablantes de lengua indígena NE	Hablantes de lengua indígena NE	NE	NE	NE	NE	NE	NE	NE	NE	No especificado	NA	NA	NA	NA	NA	NA	NA	NA	NA	NA	NA	NA	NA	NA	NA	NA	NA	NA	NA
12	Guerrero	006	Apaxtla	0068	Trincheras (Rancho las Trincheras)	1000248	181215	1528	Terracería	Conexa a carretera	Camión de redilas o troca	Más de 2 y hasta 3 horas	Sin salidas diarias	De 50 a 59 pesos	Sin hablantes de lengua indígena	Sin hablantes de lengua indígena	Sin hablantes de lengua indígena	Sin hablantes de lengua indígena	Sin hablantes de lengua indígena	Sin hablantes de lengua indígena	Sin hablantes de lengua indígena	Cría y explotación de animales	Agricultura	NE	NO	NO	NO	NO	NO	Sin problema	NA	NA	NA	NA	NA	NA	NA	NA	NA	NA	NA	NA	NA	NA	NA	NA	NA	NA	NA
12	Guerrero	006	Apaxtla	0070	Pueblo Nuevo Santa María	0995220	175902	0578	Terracería	Conexa a carretera	Micro, combi o camioneta	Más de 1 y hasta 1.5 horas	De 1 a 5 salidas al día	De 100 a 119 pesos	Sin hablantes de lengua indígena	Sin hablantes de lengua indígena	Sin hablantes de lengua indígena	Sin hablantes de lengua indígena	Sin hablantes de lengua indígena	Sin hablantes de lengua indígena	Sin hablantes de lengua indígena	Agricultura	Pesca	NE	NO	NO	NO	NO	NO	Falta de drenaje y alcantarillado	NE	Disponibilidad de red de agua NE	NE	Disponibilidad NE	NE	NE	Recolección y limpieza NE	NE	NE	NE	NE	NE	NE	NE	NE	NE	NE	NE	NE
12	Guerrero	006	Apaxtla	0075	Los Limones	1000531	181150	1079	Terracería	Conexa a carretera	Camión de redilas o troca	Más de 2 y hasta 3 horas	Sin salidas diarias	De 50 a 59 pesos	Sin hablantes de lengua indígena	Sin hablantes de lengua indígena	Sin hablantes de lengua indígena	Sin hablantes de lengua indígena	Sin hablantes de lengua indígena	Sin hablantes de lengua indígena	Sin hablantes de lengua indígena	Agricultura	Cría y explotación de animales	NE	NO	NO	NO	NO	NO	Falta de energía eléctrica	NA	NA	NA	NA	NA	NA	NA	NA	NA	NA	NA	NA	NA	NA	NA	NA	NA	NA	NA
12	Guerrero	006	Apaxtla	0079	El Pochote	0995619	180725	1160	Terracería	Conexa a carretera	Taxi	DE 15 A 19 MIN	Sin salidas diarias	De 20 a 24 pesos	Sin hablantes de lengua indígena	Sin hablantes de lengua indígena	Sin hablantes de lengua indígena	Sin hablantes de lengua indígena	Sin hablantes de lengua indígena	Sin hablantes de lengua indígena	Sin hablantes de lengua indígena	Agricultura	NE	NE	NO	NO	NO	NO	NO	Falta de empleo o emigración	NA	NA	NA	NA	NA	NA	NA	NA	NA	NA	NA	NA	NA	NA	NA	NA	NA	NA	NA
12	Guerrero	006	Apaxtla	0080	Colonia Puesta del Sol	0995632	180809	1121	Terracería	Conexa a carretera	Otro medio de transporte	De 10 a 14 min	Sin salidas diarias	Costo NE	Sin hablantes de lengua indígena	Sin hablantes de lengua indígena	Sin hablantes de lengua indígena	Sin hablantes de lengua indígena	Sin hablantes de lengua indígena	Sin hablantes de lengua indígena	Sin hablantes de lengua indígena	Hogares con empleados domésticos	Agricultura	NE	NO	NO	NO	NO	NO	Falta de infraestructura o servicio de agua	NA	NA	NA	NA	NA	NA	NA	NA	NA	NA	NA	NA	NA	NA	NA	NA	NA	NA	NA
12	Guerrero	006	Apaxtla	0082	Las Garzas	1000343	175818	0366	Terracería	Conexa a carretera	Camión de redilas o troca	Más de 1.5 y hasta 2 horas	De 1 a 5 salidas al día	De 120 a 149 pesos	Sin hablantes de lengua indígena	Sin hablantes de lengua indígena	Sin hablantes de lengua indígena	Sin hablantes de lengua indígena	Sin hablantes de lengua indígena	Sin hablantes de lengua indígena	Sin hablantes de lengua indígena	Agricultura	Pesca	NE	NO	NO	NO	NO	NO	Falta de empleo o emigración	NA	NA	NA	NA	NA	NA	NA	NA	NA	NA	NA	NA	NA	NA	NA	NA	NA	NA	NA
12	Guerrero	006	Apaxtla	0085	Pata de Burro	1000424	181300	1133	No conexa a carretera	De 4 a 10 km	No hay transporte	No hay transporte	No hay transporte	No hay transporte	Sin hablantes de lengua indígena	Sin hablantes de lengua indígena	Sin hablantes de lengua indígena	Sin hablantes de lengua indígena	Sin hablantes de lengua indígena	Sin hablantes de lengua indígena	Sin hablantes de lengua indígena	Agricultura	Cría y explotación de animales	NE	NO	NO	NO	NO	NO	Falta de energía eléctrica	NA	NA	NA	NA	NA	NA	NA	NA	NA	NA	NA	NA	NA	NA	NA	NA	NA	NA	NA
12	Guerrero	006	Apaxtla	0091	Tecuantlatzala	1000306	181224	1412	No conexa a carretera	De 4 a 10 km	Otro medio de transporte	Más de 2 y hasta 3 horas	Sin salidas diarias	De 50 a 59 pesos	Sin hablantes de lengua indígena	Sin hablantes de lengua indígena	Sin hablantes de lengua indígena	Sin hablantes de lengua indígena	Sin hablantes de lengua indígena	Sin hablantes de lengua indígena	Sin hablantes de lengua indígena	Agricultura	Cría y explotación de animales	NE	NO	NO	NO	NO	NO	Falta de carretera o transporte	NA	NA	NA	NA	NA	NA	NA	NA	NA	NA	NA	NA	NA	NA	NA	NA	NA	NA	NA
12	Guerrero	006	Apaxtla	0092	Los Torres	1000138	181223	1684	No conexa a carretera	De 4 a 10 km	No hay transporte	No hay transporte	No hay transporte	No hay transporte	Sin hablantes de lengua indígena	Sin hablantes de lengua indígena	Sin hablantes de lengua indígena	Sin hablantes de lengua indígena	Sin hablantes de lengua indígena	Sin hablantes de lengua indígena	Sin hablantes de lengua indígena	Agricultura	Cría y explotación de animales	NE	SI	NO	NO	SI	SI	Falta de carretera o transporte	NA	NA	NA	NA	NA	NA	NA	NA	NA	NA	NA	NA	NA	NA	NA	NA	NA	NA	NA
12	Guerrero	007	Arcelia	0002	Achotla	1000951	180820	0948	Terracería	Conexa a carretera	Micro, combi o camioneta	Más de 2 y hasta 3 horas	De 1 a 5 salidas al día	De 60 a 74 pesos	Sin hablantes de lengua indígena	Sin hablantes de lengua indígena	Sin hablantes de lengua indígena	Sin hablantes de lengua indígena	Sin hablantes de lengua indígena	Sin hablantes de lengua indígena	Sin hablantes de lengua indígena	Agricultura	Agricultura	Cría y explotación de animales	NO	NO	NO	NO	NO	Falta de empleo o emigración	NE	Disponibilidad de red de agua NE	NE	Disponibilidad NE	NE	NE	Recolección y limpieza NE	NE	NE	NE	NE	NE	NE	NE	NE	NE	NE	NE	NE
12	Guerrero	007	Arcelia	0003	El Aguacate	1001649	181509	0438	Terracería	Conexa a carretera	Camión de redilas o troca	De 30 a 60 min	De 1 a 5 salidas al día	De 15 a 19 pesos	Sin hablantes de lengua indígena	Sin hablantes de lengua indígena	Sin hablantes de lengua indígena	Sin hablantes de lengua indígena	Sin hablantes de lengua indígena	Sin hablantes de lengua indígena	Sin hablantes de lengua indígena	Agricultura	Agricultura	NE	NO	NO	NO	NO	NO	Pobreza o marginación	NA	NA	NA	NA	NA	NA	NA	NA	NA	NA	NA	NA	NA	NA	NA	NA	NA	NA	NA
12	Guerrero	007	Arcelia	0004	Ahuatepec (Potrero)	1001130	181853	0607	Terracería	Conexa a carretera	No hay transporte	No hay transporte	No hay transporte	No hay transporte	Sin hablantes de lengua indígena	Sin hablantes de lengua indígena	Sin hablantes de lengua indígena	Sin hablantes de lengua indígena	Sin hablantes de lengua indígena	Sin hablantes de lengua indígena	Sin hablantes de lengua indígena	Agricultura	NE	NE	NO	NO	NO	NO	NO	Falta de infraestructura o servicio de agua	NA	NA	NA	NA	NA	NA	NA	NA	NA	NA	NA	NA	NA	NA	NA	NA	NA	NA	NA
12	Guerrero	007	Arcelia	0005	El Amacuáhuitl	1001519	181352	0480	Terracería	Conexa a carretera	Micro, combi o camioneta	De 30 a 60 min	De 1 a 5 salidas al día	De 20 a 24 pesos	Sin hablantes de lengua indígena	Sin hablantes de lengua indígena	Sin hablantes de lengua indígena	Sin hablantes de lengua indígena	Sin hablantes de lengua indígena	Sin hablantes de lengua indígena	Sin hablantes de lengua indígena	Agricultura	Agricultura	Cría y explotación de animales	NO	NO	NO	NO	NO	Falta de empleo o emigración	SI	Disponible con cobro	NO	Red de drenaje no disponible	NO	NO	No hay recolección	SI	NO	SI	SI	SI	NO	NO	NO	NO	NO	NO	SI
12	Guerrero	007	Arcelia	0006	El Aviluz	1001727	181413	0451	Terracería	Conexa a carretera	Micro, combi o camioneta	De 30 a 60 min	De 1 a 5 salidas al día	De 20 a 24 pesos	Sin hablantes de lengua indígena	Sin hablantes de lengua indígena	Sin hablantes de lengua indígena	Sin hablantes de lengua indígena	Sin hablantes de lengua indígena	Sin hablantes de lengua indígena	Sin hablantes de lengua indígena	Agricultura	Agricultura	Cría y explotación de animales	NO	NO	NO	NO	NO	Falta de apoyo o deficiencia gubernamental	NA	NA	NA	NA	NA	NA	NA	NA	NA	NA	NA	NA	NA	NA	NA	NA	NA	NA	NA
12	Guerrero	007	Arcelia	0007	Azizintla	1000822	181522	1234	Terracería	Conexa a carretera	No hay transporte	No hay transporte	No hay transporte	No hay transporte	Con hablantes de lengua indígena	Náhuatl	SI	NO	SI	SI	NO	Agricultura	Agricultura	NE	NO	NO	NO	NO	NO	Falta de energía eléctrica	NA	NA	NA	NA	NA	NA	NA	NA	NA	NA	NA	NA	NA	NA	NA	NA	NA	NA	NA
12	Guerrero	007	Arcelia	0009	Los Bices	1000901	181240	1068	No conexa a carretera	De 1 a 3 km	No hay transporte	No hay transporte	No hay transporte	No hay transporte	Sin hablantes de lengua indígena	Sin hablantes de lengua indígena	Sin hablantes de lengua indígena	Sin hablantes de lengua indígena	Sin hablantes de lengua indígena	Sin hablantes de lengua indígena	Sin hablantes de lengua indígena	Agricultura	NE	NE	NO	NO	NO	NO	NO	Falta de energía eléctrica	NA	NA	NA	NA	NA	NA	NA	NA	NA	NA	NA	NA	NA	NA	NA	NA	NA	NA	NA
12	Guerrero	007	Arcelia	0010	Los Brasiles	1001209	182305	0459	Pavimentada	Conexa a carretera	Micro, combi o camioneta	De 20 a 24 min	De 11 a 20 salidas al día	De 10 a 14 pesos	Sin hablantes de lengua indígena	Sin hablantes de lengua indígena	Sin hablantes de lengua indígena	Sin hablantes de lengua indígena	Sin hablantes de lengua indígena	Sin hablantes de lengua indígena	Sin hablantes de lengua indígena	Agricultura	NE	NE	NO	NO	NO	NO	NO	Falta de empleo o emigración	NE	Disponibilidad de red de agua NE	NE	Disponibilidad NE	NE	NE	Recolección y limpieza NE	NE	NE	NE	NE	NE	NE	NE	NE	NE	NE	NE	NE
12	Guerrero	007	Arcelia	0011	Cacahuananche	1000737	181718	1059	Terracería	Conexa a carretera	Micro, combi o camioneta	Más de 2 y hasta 3 horas	De 1 a 5 salidas al día	De 50 a 59 pesos	Con hablantes de lengua indígena	Náhuatl	SI	SI	NO	SI	SI	Agricultura	NE	NE	SI	NO	NO	NO	NO	Falta de infraestructura o servicio de agua	NA	NA	NA	NA	NA	NA	NA	NA	NA	NA	NA	NA	NA	NA	NA	NA	NA	NA	NA
12	Guerrero	007	Arcelia	0012	Colonia Filiberto Gómez (La Ceiba)	1001415	182310	0420	Pavimentada	Conexa a carretera	Micro, combi o camioneta	De 20 a 24 min	De 1 a 5 salidas al día	De 10 a 14 pesos	Sin hablantes de lengua indígena	Sin hablantes de lengua indígena	Sin hablantes de lengua indígena	Sin hablantes de lengua indígena	Sin hablantes de lengua indígena	Sin hablantes de lengua indígena	Sin hablantes de lengua indígena	Pesca	Insuficientemente especificado del sector comercio al por menor	Insuficientemente especificado del sector comercio al por menor	NO	NO	NO	NO	NO	Falta de recursos económicos	NE	Disponibilidad de red de agua NE	NE	Disponibilidad NE	NE	NE	Recolección y limpieza NE	NE	NE	NE	NE	NE	NE	NE	NE	NE	NE	NE	NE
12	Guerrero	007	Arcelia	0013	Campo Morado	1000743	181228	1368	Terracería	Conexa a carretera	No hay transporte	No hay transporte	No hay transporte	No hay transporte	Sin hablantes de lengua indígena	Sin hablantes de lengua indígena	Sin hablantes de lengua indígena	Sin hablantes de lengua indígena	Sin hablantes de lengua indígena	Sin hablantes de lengua indígena	Sin hablantes de lengua indígena	Agricultura	Agricultura	Descripciones insuficientemente especificadas de minerales metálicos y no metálicos	NO	NO	NO	NO	NO	Falta de infraestructura o servicio de agua	NA	NA	NA	NA	NA	NA	NA	NA	NA	NA	NA	NA	NA	NA	NA	NA	NA	NA	NA
12	Guerrero	007	Arcelia	0016	El Cazahuate	1001441	181730	0459	Terracería	Conexa a carretera	Micro, combi o camioneta	De 20 a 24 min	De 1 a 5 salidas al día	De 10 a 14 pesos	Sin hablantes de lengua indígena	Sin hablantes de lengua indígena	Sin hablantes de lengua indígena	Sin hablantes de lengua indígena	Sin hablantes de lengua indígena	Sin hablantes de lengua indígena	Sin hablantes de lengua indígena	Agricultura	Agricultura	NE	NO	NO	NO	NO	NO	Falta de otros servicios o equipamiento	NA	NA	NA	NA	NA	NA	NA	NA	NA	NA	NA	NA	NA	NA	NA	NA	NA	NA	NA
12	Guerrero	007	Arcelia	0017	Cerro Gordo	1000343	182135	1578	Terracería	Conexa a carretera	Micro, combi o camioneta	De 30 a 60 min	De 1 a 5 salidas al día	De 60 a 74 pesos	Sin hablantes de lengua indígena	Sin hablantes de lengua indígena	Sin hablantes de lengua indígena	Sin hablantes de lengua indígena	Sin hablantes de lengua indígena	Sin hablantes de lengua indígena	Sin hablantes de lengua indígena	Agricultura	NE	NE	NO	NO	NO	NO	NO	Falta de energía eléctrica	NA	NA	NA	NA	NA	NA	NA	NA	NA	NA	NA	NA	NA	NA	NA	NA	NA	NA	NA
12	Guerrero	007	Arcelia	0018	Cerro Verde	1000728	181944	1022	Terracería	Conexa a carretera	Camión de redilas o troca	Más de 1 y hasta 1.5 horas	De 1 a 5 salidas al día	De 30 a 34 pesos	Sin hablantes de lengua indígena	Sin hablantes de lengua indígena	Sin hablantes de lengua indígena	Sin hablantes de lengua indígena	Sin hablantes de lengua indígena	Sin hablantes de lengua indígena	Sin hablantes de lengua indígena	Agricultura	Cría y explotación de animales	NE	NO	NO	NO	NO	NO	Pobreza o marginación	NO	Red de agua no disponible	NO	Red de drenaje no disponible	NO	NO	No hay recolección	SI	NO	NO	NO	SI	NO	NO	NO	NO	NO	NO	SI
12	Guerrero	007	Arcelia	0019	Caloxtitlán	1000547	181856	1053	Terracería	Conexa a carretera	No hay transporte	No hay transporte	No hay transporte	No hay transporte	Sin hablantes de lengua indígena	Sin hablantes de lengua indígena	Sin hablantes de lengua indígena	Sin hablantes de lengua indígena	Sin hablantes de lengua indígena	Sin hablantes de lengua indígena	Sin hablantes de lengua indígena	Agricultura	Agricultura	NE	NO	NO	NO	NO	NO	Falta de infraestructura o servicio de agua	NA	NA	NA	NA	NA	NA	NA	NA	NA	NA	NA	NA	NA	NA	NA	NA	NA	NA	NA
12	Guerrero	007	Arcelia	0022	Colonia Vicente Guerrero (Comol)	1001239	181301	0634	Terracería	Conexa a carretera	Micro, combi o camioneta	De 30 a 60 min	De 1 a 5 salidas al día	De 35 a 39 pesos	Sin hablantes de lengua indígena	Sin hablantes de lengua indígena	Sin hablantes de lengua indígena	Sin hablantes de lengua indígena	Sin hablantes de lengua indígena	Sin hablantes de lengua indígena	Sin hablantes de lengua indígena	Agricultura	Agricultura	NE	NO	NO	NO	NO	NO	Falta de infraestructura o servicio de agua	NA	NA	NA	NA	NA	NA	NA	NA	NA	NA	NA	NA	NA	NA	NA	NA	NA	NA	NA
12	Guerrero	007	Arcelia	0023	Xochitla	1000840	181623	0874	Terracería	Conexa a carretera	Micro, combi o camioneta	Más de 2 y hasta 3 horas	De 1 a 5 salidas al día	De 50 a 59 pesos	Con hablantes de lengua indígena	Náhuatl	SI	NO	NO	SI	SI	Agricultura	Agricultura	NE	NO	NO	NO	NO	NO	Falta de infraestructura o servicio de agua	NA	NA	NA	NA	NA	NA	NA	NA	NA	NA	NA	NA	NA	NA	NA	NA	NA	NA	NA
12	Guerrero	007	Arcelia	0024	Copaltepec	1000631	181608	1230	Terracería	Conexa a carretera	No hay transporte	No hay transporte	No hay transporte	No hay transporte	Con hablantes de lengua indígena	Náhuatl	NO	NO	SI	SI	NO	Agricultura	NE	NE	NO	NO	NO	NO	NO	Falta de infraestructura o servicio de agua	NA	NA	NA	NA	NA	NA	NA	NA	NA	NA	NA	NA	NA	NA	NA	NA	NA	NA	NA
12	Guerrero	007	Arcelia	0025	El Corindón (El Reparo)	1000628	182044	0956	Terracería	Conexa a carretera	Camión de redilas o troca	De 30 a 60 min	De 1 a 5 salidas al día	De 35 a 39 pesos	Sin hablantes de lengua indígena	Sin hablantes de lengua indígena	Sin hablantes de lengua indígena	Sin hablantes de lengua indígena	Sin hablantes de lengua indígena	Sin hablantes de lengua indígena	Sin hablantes de lengua indígena	Agricultura	NE	NE	NO	NO	NO	NO	NO	Falta de infraestructura o servicio de agua	NA	NA	NA	NA	NA	NA	NA	NA	NA	NA	NA	NA	NA	NA	NA	NA	NA	NA	NA
12	Guerrero	007	Arcelia	0028	El Escondido (Valle el Escondido)	1001839	181311	0360	Pavimentada	Conexa a carretera	Micro, combi o camioneta	De 30 a 60 min	De 1 a 5 salidas al día	De 15 a 19 pesos	Sin hablantes de lengua indígena	Sin hablantes de lengua indígena	Sin hablantes de lengua indígena	Sin hablantes de lengua indígena	Sin hablantes de lengua indígena	Sin hablantes de lengua indígena	Sin hablantes de lengua indígena	Agricultura	Agricultura	Cría y explotación de animales	NO	NO	NO	NO	SI	Falta de empleo o emigración	SI	Disponible con cobro	NO	Red de drenaje no disponible	SI	SI	Queman la basura	SI	NO	SI	NO	SI	SI	NO	NO	NO	NO	NO	SI
12	Guerrero	007	Arcelia	0030	Ixcatepec	1000516	181701	1429	Terracería	Conexa a carretera	Micro, combi o camioneta	Más de 1.5 y hasta 2 horas	De 1 a 5 salidas al día	De 50 a 59 pesos	Con hablantes de lengua indígena	Náhuatl	SI	NO	NO	NO	NO	Agricultura	NE	NE	NO	NO	NO	NO	NO	Pobreza o marginación	SI	Disponible con cobro	SI	Disponible con desalojo a grieta o barranca	NO	SI	Queman la basura	SI	SI	SI	NO	SI	SI	SI	NO	NO	NO	NO	SI
12	Guerrero	007	Arcelia	0031	Las Juntas	1000928	181905	0718	Terracería	Conexa a carretera	No hay transporte	No hay transporte	No hay transporte	No hay transporte	Sin hablantes de lengua indígena	Sin hablantes de lengua indígena	Sin hablantes de lengua indígena	Sin hablantes de lengua indígena	Sin hablantes de lengua indígena	Sin hablantes de lengua indígena	Sin hablantes de lengua indígena	Agricultura	NE	NE	NO	NO	NO	NO	NO	Pobreza o marginación	NA	NA	NA	NA	NA	NA	NA	NA	NA	NA	NA	NA	NA	NA	NA	NA	NA	NA	NA
12	Guerrero	007	Arcelia	0033	Los Limos	1000856	181941	0748	Terracería	Conexa a carretera	No hay transporte	No hay transporte	No hay transporte	No hay transporte	Sin hablantes de lengua indígena	Sin hablantes de lengua indígena	Sin hablantes de lengua indígena	Sin hablantes de lengua indígena	Sin hablantes de lengua indígena	Sin hablantes de lengua indígena	Sin hablantes de lengua indígena	Agricultura	NE	NE	NO	NO	NO	NO	NO	Falta de infraestructura o servicio de agua	NA	NA	NA	NA	NA	NA	NA	NA	NA	NA	NA	NA	NA	NA	NA	NA	NA	NA	NA
12	Guerrero	007	Arcelia	0036	Mumuxtitlán	1000606	181419	1296	Terracería	Conexa a carretera	No hay transporte	No hay transporte	No hay transporte	No hay transporte	Con hablantes de lengua indígena	Náhuatl	SI	NO	SI	SI	NO	Agricultura	Agricultura	NE	NO	NO	NO	SI	NO	Delincuencia o inseguridad	NA	NA	NA	NA	NA	NA	NA	NA	NA	NA	NA	NA	NA	NA	NA	NA	NA	NA	NA
12	Guerrero	007	Arcelia	0037	El Naranjo	1001118	182242	0500	Pavimentada	Conexa a carretera	Micro, combi o camioneta	De 30 a 60 min	De 11 a 20 salidas al día	De 10 a 14 pesos	Sin hablantes de lengua indígena	Sin hablantes de lengua indígena	Sin hablantes de lengua indígena	Sin hablantes de lengua indígena	Sin hablantes de lengua indígena	Sin hablantes de lengua indígena	Sin hablantes de lengua indígena	Agricultura	Agricultura	NE	NO	NO	NO	NO	NO	Contaminación ambiental	NE	Disponibilidad de red de agua NE	NE	Disponibilidad NE	NE	NE	Recolección y limpieza NE	NE	NE	NE	NE	NE	NE	NE	NE	NE	NE	NE	NE
12	Guerrero	007	Arcelia	0038	Nicolás Bravo	1000934	181500	0897	Terracería	Conexa a carretera	Micro, combi o camioneta	Más de 1.5 y hasta 2 horas	De 1 a 5 salidas al día	De 50 a 59 pesos	Con hablantes de lengua indígena	Náhuatl	SI	NO	NO	SI	NO	Agricultura	Agricultura	NE	NO	NO	NO	NO	NO	Falta de energía eléctrica	NA	NA	NA	NA	NA	NA	NA	NA	NA	NA	NA	NA	NA	NA	NA	NA	NA	NA	NA
12	Guerrero	007	Arcelia	0039	Ojo de Agua	1000939	182145	0619	NE	Conexión a carretera NE	Micro, combi o camioneta	De 30 a 60 min	De 1 a 5 salidas al día	De 15 a 19 pesos	Sin hablantes de lengua indígena	Sin hablantes de lengua indígena	Sin hablantes de lengua indígena	Sin hablantes de lengua indígena	Sin hablantes de lengua indígena	Sin hablantes de lengua indígena	Sin hablantes de lengua indígena	Agricultura	NE	NE	NO	NO	NO	NO	NO	Falta de energía eléctrica	SI	Disponible con cobro	NO	Red de drenaje no disponible	NO	NO	No hay recolección	SI	SI	SI	NO	NO	NO	NO	NO	NO	NO	NO	SI
12	Guerrero	007	Arcelia	0040	Palapa	1000759	182208	0877	Terracería	Conexa a carretera	No hay transporte	No hay transporte	No hay transporte	No hay transporte	Sin hablantes de lengua indígena	Sin hablantes de lengua indígena	Sin hablantes de lengua indígena	Sin hablantes de lengua indígena	Sin hablantes de lengua indígena	Sin hablantes de lengua indígena	Sin hablantes de lengua indígena	Agricultura	NE	NE	NO	NO	NO	NO	NO	Pobreza o marginación	NA	NA	NA	NA	NA	NA	NA	NA	NA	NA	NA	NA	NA	NA	NA	NA	NA	NA	NA
12	Guerrero	007	Arcelia	0041	Palos Altos	1001629	182214	0360	Pavimentada	Conexa a carretera	Micro, combi o camioneta	DE 15 A 19 MIN	De 21 a 30 salidas al día	De 7 a 9 pesos	Sin hablantes de lengua indígena	Sin hablantes de lengua indígena	Sin hablantes de lengua indígena	Sin hablantes de lengua indígena	Sin hablantes de lengua indígena	Sin hablantes de lengua indígena	Sin hablantes de lengua indígena	Insuficientemente especificado del sector construcción	Agricultura	NE	SI	NO	NO	NO	NO	Falta de empleo o emigración	NO	Red de agua no disponible	SI	Disponible con desalojo a un cuerpo de agua	NO	NO	No hay recolección	SI	SI	SI	SI	SI	NO	NO	NO	NO	NO	NO	SI
12	Guerrero	007	Arcelia	0044	Las Parotas	1001357	181634	0685	Terracería	Conexa a carretera	No hay transporte	No hay transporte	No hay transporte	No hay transporte	Sin hablantes de lengua indígena	Sin hablantes de lengua indígena	Sin hablantes de lengua indígena	Sin hablantes de lengua indígena	Sin hablantes de lengua indígena	Sin hablantes de lengua indígena	Sin hablantes de lengua indígena	Agricultura	Agricultura	Agricultura	NO	NO	NO	NO	NO	Falta de energía eléctrica	NA	NA	NA	NA	NA	NA	NA	NA	NA	NA	NA	NA	NA	NA	NA	NA	NA	NA	NA
12	Guerrero	007	Arcelia	0045	El Potrerillo	1001006	181939	0677	Terracería	Conexa a carretera	No hay transporte	No hay transporte	No hay transporte	No hay transporte	Sin hablantes de lengua indígena	Sin hablantes de lengua indígena	Sin hablantes de lengua indígena	Sin hablantes de lengua indígena	Sin hablantes de lengua indígena	Sin hablantes de lengua indígena	Sin hablantes de lengua indígena	Agricultura	NE	NE	NO	NO	SI	NO	NO	Falta de infraestructura o servicio de agua	NA	NA	NA	NA	NA	NA	NA	NA	NA	NA	NA	NA	NA	NA	NA	NA	NA	NA	NA
12	Guerrero	007	Arcelia	0046	Pozo Zarco	1000924	181323	0836	Terracería	Conexa a carretera	No hay transporte	No hay transporte	No hay transporte	No hay transporte	Sin hablantes de lengua indígena	Sin hablantes de lengua indígena	Sin hablantes de lengua indígena	Sin hablantes de lengua indígena	Sin hablantes de lengua indígena	Sin hablantes de lengua indígena	Sin hablantes de lengua indígena	Agricultura	Descripciones insuficientemente especificadas de minerales metálicos y no metálicos	NE	NO	NO	NO	NO	NO	Falta de infraestructura o servicio de agua	NA	NA	NA	NA	NA	NA	NA	NA	NA	NA	NA	NA	NA	NA	NA	NA	NA	NA	NA
12	Guerrero	007	Arcelia	0047	La Providencia	1000531	181547	1277	Terracería	Conexa a carretera	No hay transporte	No hay transporte	No hay transporte	No hay transporte	Con hablantes de lengua indígena	Náhuatl	SI	NO	SI	NO	NO	Agricultura	Cría y explotación de animales	NE	NO	NO	NO	NO	NO	Falta de infraestructura o servicio de agua	NA	NA	NA	NA	NA	NA	NA	NA	NA	NA	NA	NA	NA	NA	NA	NA	NA	NA	NA
12	Guerrero	007	Arcelia	0049	El Salitre	1001404	181500	0503	Terracería	Conexa a carretera	Micro, combi o camioneta	De 30 a 60 min	De 1 a 5 salidas al día	De 20 a 24 pesos	Sin hablantes de lengua indígena	Sin hablantes de lengua indígena	Sin hablantes de lengua indígena	Sin hablantes de lengua indígena	Sin hablantes de lengua indígena	Sin hablantes de lengua indígena	Sin hablantes de lengua indígena	Agricultura	NE	NE	NO	NO	NO	NO	NO	Contaminación ambiental	NA	NA	NA	NA	NA	NA	NA	NA	NA	NA	NA	NA	NA	NA	NA	NA	NA	NA	NA
12	Guerrero	007	Arcelia	0050	San Bartolo	1000526	181401	1124	No conexa a carretera	De 1 a 3 km	No hay transporte	No hay transporte	No hay transporte	No hay transporte	Sin hablantes de lengua indígena	Sin hablantes de lengua indígena	Sin hablantes de lengua indígena	Sin hablantes de lengua indígena	Sin hablantes de lengua indígena	Sin hablantes de lengua indígena	Sin hablantes de lengua indígena	Agricultura	Comercio al por mayor de materias primas agropecuarias y forestales, para la industria, y materiales de desecho	NE	NO	NO	NO	NO	NO	Falta de energía eléctrica	NA	NA	NA	NA	NA	NA	NA	NA	NA	NA	NA	NA	NA	NA	NA	NA	NA	NA	NA
12	Guerrero	007	Arcelia	0051	San Francisco	1000530	181326	1175	No conexa a carretera	De 1 a 3 km	No hay transporte	No hay transporte	No hay transporte	No hay transporte	Con hablantes de lengua indígena	Náhuatl	NO	NO	SI	SI	NO	Agricultura	Comercio al por menor de abarrotes, alimentos, bebidas, hielo y tabaco	NE	NO	NO	NO	NO	NO	Falta de energía eléctrica	NA	NA	NA	NA	NA	NA	NA	NA	NA	NA	NA	NA	NA	NA	NA	NA	NA	NA	NA
12	Guerrero	007	Arcelia	0052	San Miguelito	1001232	181346	0580	Terracería	Conexa a carretera	Micro, combi o camioneta	De 30 a 60 min	De 1 a 5 salidas al día	De 35 a 39 pesos	Sin hablantes de lengua indígena	Sin hablantes de lengua indígena	Sin hablantes de lengua indígena	Sin hablantes de lengua indígena	Sin hablantes de lengua indígena	Sin hablantes de lengua indígena	Sin hablantes de lengua indígena	Agricultura	Agricultura	NE	NO	NO	NO	NO	NO	Falta de infraestructura o servicio de agua	NA	NA	NA	NA	NA	NA	NA	NA	NA	NA	NA	NA	NA	NA	NA	NA	NA	NA	NA
12	Guerrero	007	Arcelia	0053	San Miguel Lindavista	1000643	181428	1272	Terracería	Conexa a carretera	No hay transporte	No hay transporte	No hay transporte	No hay transporte	Con hablantes de lengua indígena	Náhuatl	SI	NO	SI	SI	NO	Agricultura	NE	NE	NO	NO	NO	NO	NO	Falta de infraestructura o servicio de agua	NA	NA	NA	NA	NA	NA	NA	NA	NA	NA	NA	NA	NA	NA	NA	NA	NA	NA	NA
12	Guerrero	007	Arcelia	0055	Santo Tomás	1001424	180549	0331	Terracería	Conexa a carretera	Micro, combi o camioneta	Más de 1 y hasta 1.5 horas	De 1 a 5 salidas al día	De 40 a 49 pesos	Sin hablantes de lengua indígena	Sin hablantes de lengua indígena	Sin hablantes de lengua indígena	Sin hablantes de lengua indígena	Sin hablantes de lengua indígena	Sin hablantes de lengua indígena	Sin hablantes de lengua indígena	Agricultura	Agricultura	Cría y explotación de animales	NO	NO	NO	NO	NO	Falta de empleo o emigración	SI	Disponible con cobro	NO	Red de drenaje no disponible	NO	NO	No hay recolección	SI	NO	SI	SI	SI	NO	SI	NO	NO	NO	NO	SI
12	Guerrero	007	Arcelia	0056	La Soledad	1001059	181411	0687	Terracería	Conexa a carretera	Camión de redilas o troca	De 30 a 60 min	De 1 a 5 salidas al día	De 40 a 49 pesos	Con hablantes de lengua indígena	Náhuatl	SI	NO	SI	NO	NO	Agricultura	Agricultura	Cría y explotación de animales	NO	NO	NO	NO	NO	Falta de otros servicios o equipamiento	NA	NA	NA	NA	NA	NA	NA	NA	NA	NA	NA	NA	NA	NA	NA	NA	NA	NA	NA
12	Guerrero	007	Arcelia	0057	Los Tamarindos	1001459	181227	0440	NE	Conexión a carretera NE	Disponibilidad de transporte NE	Disponibilidad de transporte NE	Disponibilidad de transporte NE	Disponibilidad de transporte NE	NE	Hablantes de lengua indígena NE	Hablantes de lengua indígena NE	Hablantes de lengua indígena NE	Hablantes de lengua indígena NE	Hablantes de lengua indígena NE	Hablantes de lengua indígena NE	NE	NE	NE	NE	NE	NE	NE	NE	No especificado	NA	NA	NA	NA	NA	NA	NA	NA	NA	NA	NA	NA	NA	NA	NA	NA	NA	NA	NA
12	Guerrero	007	Arcelia	0058	Temixco	1001247	180828	0439	Terracería	Conexa a carretera	Micro, combi o camioneta	Más de 2 y hasta 3 horas	De 1 a 5 salidas al día	De 40 a 49 pesos	Sin hablantes de lengua indígena	Sin hablantes de lengua indígena	Sin hablantes de lengua indígena	Sin hablantes de lengua indígena	Sin hablantes de lengua indígena	Sin hablantes de lengua indígena	Sin hablantes de lengua indígena	Agricultura	Agricultura	Cría y explotación de animales	NO	NO	NO	NO	NO	Falta de empleo o emigración	NO	Red de agua no disponible	NO	Red de drenaje no disponible	NO	NO	No hay recolección	SI	SI	SI	NO	SI	NO	SI	NO	NO	NO	NO	SI
12	Guerrero	007	Arcelia	0059	El Terrerito	1001624	181401	0461	Terracería	Conexa a carretera	Micro, combi o camioneta	De 30 a 60 min	De 1 a 5 salidas al día	De 20 a 24 pesos	Sin hablantes de lengua indígena	Sin hablantes de lengua indígena	Sin hablantes de lengua indígena	Sin hablantes de lengua indígena	Sin hablantes de lengua indígena	Sin hablantes de lengua indígena	Sin hablantes de lengua indígena	Agricultura	Agricultura	Cría y explotación de animales	NO	NO	NO	NO	NO	Falta de empleo o emigración	NA	NA	NA	NA	NA	NA	NA	NA	NA	NA	NA	NA	NA	NA	NA	NA	NA	NA	NA
12	Guerrero	007	Arcelia	0061	Texcaltitlán (El Capire)	1000620	181807	1322	Terracería	Conexa a carretera	No hay transporte	No hay transporte	No hay transporte	No hay transporte	Sin hablantes de lengua indígena	Sin hablantes de lengua indígena	Sin hablantes de lengua indígena	Sin hablantes de lengua indígena	Sin hablantes de lengua indígena	Sin hablantes de lengua indígena	Sin hablantes de lengua indígena	Agricultura	Agricultura	NE	NO	NO	NO	NO	NO	Falta de infraestructura o servicio de agua	NA	NA	NA	NA	NA	NA	NA	NA	NA	NA	NA	NA	NA	NA	NA	NA	NA	NA	NA
12	Guerrero	007	Arcelia	0062	Tlalchichilpa	1001659	182053	0391	Pavimentada	Conexa a carretera	Micro, combi o camioneta	De 3 a 9 min	De 1 a 5 salidas al día	De 7 a 9 pesos	Sin hablantes de lengua indígena	Sin hablantes de lengua indígena	Sin hablantes de lengua indígena	Sin hablantes de lengua indígena	Sin hablantes de lengua indígena	Sin hablantes de lengua indígena	Sin hablantes de lengua indígena	Agricultura	NE	NE	SI	NO	NO	NO	NO	Falta de empleo o emigración	NO	Red de agua no disponible	NO	Red de drenaje no disponible	NO	NO	No hay recolección	SI	NO	NO	NO	SI	SI	NO	NO	NO	NO	NO	SI
12	Guerrero	007	Arcelia	0065	Las Trincheras	1000357	182118	1504	Terracería	Conexa a carretera	No hay transporte	No hay transporte	No hay transporte	No hay transporte	Sin hablantes de lengua indígena	Sin hablantes de lengua indígena	Sin hablantes de lengua indígena	Sin hablantes de lengua indígena	Sin hablantes de lengua indígena	Sin hablantes de lengua indígena	Sin hablantes de lengua indígena	Agricultura	Industria alimentaria	Cría y explotación de animales	NO	NO	NO	NO	NO	Falta de infraestructura o servicio de agua	NA	NA	NA	NA	NA	NA	NA	NA	NA	NA	NA	NA	NA	NA	NA	NA	NA	NA	NA
12	Guerrero	007	Arcelia	0066	La Trinidad (Ejido Colonia Xochitla)	1001040	181620	0924	Terracería	Conexa a carretera	Micro, combi o camioneta	Más de 1.5 y hasta 2 horas	De 1 a 5 salidas al día	De 40 a 49 pesos	Sin hablantes de lengua indígena	Sin hablantes de lengua indígena	Sin hablantes de lengua indígena	Sin hablantes de lengua indígena	Sin hablantes de lengua indígena	Sin hablantes de lengua indígena	Sin hablantes de lengua indígena	Agricultura	Agricultura	NE	NO	NO	NO	NO	NO	Falta de energía eléctrica	NA	NA	NA	NA	NA	NA	NA	NA	NA	NA	NA	NA	NA	NA	NA	NA	NA	NA	NA
12	Guerrero	007	Arcelia	0067	Tulatengo	1001805	181559	0399	Terracería	Conexa a carretera	Micro, combi o camioneta	De 20 a 24 min	De 1 a 5 salidas al día	De 10 a 14 pesos	Sin hablantes de lengua indígena	Sin hablantes de lengua indígena	Sin hablantes de lengua indígena	Sin hablantes de lengua indígena	Sin hablantes de lengua indígena	Sin hablantes de lengua indígena	Sin hablantes de lengua indígena	Agricultura	Agricultura	Cría y explotación de animales	NO	NO	NO	NO	NO	Falta de empleo o emigración	NE	Disponibilidad de red de agua NE	NE	Disponibilidad NE	NE	NE	Recolección y limpieza NE	NE	NE	NE	NE	NE	NE	NE	NE	NE	NE	NE	NE
12	Guerrero	007	Arcelia	0068	El Ushe	1001509	182056	0457	NE	Conexión a carretera NE	Micro, combi o camioneta	De 30 a 60 min	De 1 a 5 salidas al día	De 20 a 24 pesos	Sin hablantes de lengua indígena	Sin hablantes de lengua indígena	Sin hablantes de lengua indígena	Sin hablantes de lengua indígena	Sin hablantes de lengua indígena	Sin hablantes de lengua indígena	Sin hablantes de lengua indígena	Agricultura	Cría y explotación de animales	NE	NO	NO	NO	NO	NO	Falta de infraestructura o servicio de agua	NA	NA	NA	NA	NA	NA	NA	NA	NA	NA	NA	NA	NA	NA	NA	NA	NA	NA	NA
12	Guerrero	007	Arcelia	0069	Valle Galeana (El Tamarindo)	1001419	180748	0370	Terracería	Conexa a carretera	Micro, combi o camioneta	Más de 1 y hasta 1.5 horas	De 1 a 5 salidas al día	De 40 a 49 pesos	Sin hablantes de lengua indígena	Sin hablantes de lengua indígena	Sin hablantes de lengua indígena	Sin hablantes de lengua indígena	Sin hablantes de lengua indígena	Sin hablantes de lengua indígena	Sin hablantes de lengua indígena	Agricultura	Agricultura	Agricultura	NO	NO	NO	NO	NO	Falta de empleo o emigración	SI	Disponible con cobro	NO	Red de drenaje no disponible	NO	NO	No hay recolección	SI	SI	SI	SI	SI	NO	NO	NO	NO	NO	NO	SI
12	Guerrero	007	Arcelia	0071	El Veladero	1001204	182058	0833	Terracería	Conexa a carretera	Micro, combi o camioneta	Más de 1 y hasta 1.5 horas	De 1 a 5 salidas al día	De 40 a 49 pesos	Sin hablantes de lengua indígena	Sin hablantes de lengua indígena	Sin hablantes de lengua indígena	Sin hablantes de lengua indígena	Sin hablantes de lengua indígena	Sin hablantes de lengua indígena	Sin hablantes de lengua indígena	Agricultura	NE	NE	NO	NO	NO	NO	NO	Contaminación ambiental	NA	NA	NA	NA	NA	NA	NA	NA	NA	NA	NA	NA	NA	NA	NA	NA	NA	NA	NA
12	Guerrero	007	Arcelia	0072	Xochicalco	1000745	181031	1174	Terracería	Conexa a carretera	No hay transporte	No hay transporte	No hay transporte	No hay transporte	Sin hablantes de lengua indígena	Sin hablantes de lengua indígena	Sin hablantes de lengua indígena	Sin hablantes de lengua indígena	Sin hablantes de lengua indígena	Sin hablantes de lengua indígena	Sin hablantes de lengua indígena	Agricultura	Agricultura	Cría y explotación de animales	NO	NO	NO	NO	NO	Falta de recursos económicos	NE	Disponibilidad de red de agua NE	NE	Disponibilidad NE	NE	NE	Recolección y limpieza NE	NE	NE	NE	NE	NE	NE	NE	NE	NE	NE	NE	NE
12	Guerrero	007	Arcelia	0074	Almoloya (Almoloya el Grande)	1001034	182205	0540	Pavimentada	Conexa a carretera	Micro, combi o camioneta	De 30 a 60 min	De 21 a 30 salidas al día	De 15 a 19 pesos	Sin hablantes de lengua indígena	Sin hablantes de lengua indígena	Sin hablantes de lengua indígena	Sin hablantes de lengua indígena	Sin hablantes de lengua indígena	Sin hablantes de lengua indígena	Sin hablantes de lengua indígena	Agricultura	NE	NE	NO	NO	SI	NO	SI	Falta de otros servicios o equipamiento	SI	Disponible con cobro	SI	Disponible con desalojo a un cuerpo de agua	NO	SI	Desalojan la basura a otro lugar	SI	SI	NO	SI	SI	SI	SI	NO	NO	NO	SI	SI
12	Guerrero	007	Arcelia	0076	El Mirador	1001453	182311	0419	Pavimentada	Conexa a carretera	Micro, combi o camioneta	DE 15 A 19 MIN	De 11 a 20 salidas al día	De 10 a 14 pesos	Sin hablantes de lengua indígena	Sin hablantes de lengua indígena	Sin hablantes de lengua indígena	Sin hablantes de lengua indígena	Sin hablantes de lengua indígena	Sin hablantes de lengua indígena	Sin hablantes de lengua indígena	Pesca	Agricultura	NE	NO	NO	NO	NO	NO	No especificado	NA	NA	NA	NA	NA	NA	NA	NA	NA	NA	NA	NA	NA	NA	NA	NA	NA	NA	NA
12	Guerrero	007	Arcelia	0079	San Martín	1001142	182311	0492	Pavimentada	Conexa a carretera	Micro, combi o camioneta	DE 15 A 19 MIN	Frecuencia NE	De 15 a 19 pesos	Sin hablantes de lengua indígena	Sin hablantes de lengua indígena	Sin hablantes de lengua indígena	Sin hablantes de lengua indígena	Sin hablantes de lengua indígena	Sin hablantes de lengua indígena	Sin hablantes de lengua indígena	Agricultura	NE	NE	NO	NO	NO	NO	NO	Contaminación ambiental	NA	NA	NA	NA	NA	NA	NA	NA	NA	NA	NA	NA	NA	NA	NA	NA	NA	NA	NA
12	Guerrero	007	Arcelia	0086	Los Cajones	1001034	181542	1028	Terracería	Conexa a carretera	No hay transporte	No hay transporte	No hay transporte	No hay transporte	Con hablantes de lengua indígena	Náhuatl	SI	NO	NO	NO	NO	Agricultura	Agricultura	Agricultura	NO	NO	NO	NO	NO	Falta de energía eléctrica	NA	NA	NA	NA	NA	NA	NA	NA	NA	NA	NA	NA	NA	NA	NA	NA	NA	NA	NA
12	Guerrero	007	Arcelia	0087	Nuevo León	1001049	181712	0997	Terracería	Conexa a carretera	Micro, combi o camioneta	Más de 1 y hasta 1.5 horas	De 1 a 5 salidas al día	De 30 a 34 pesos	Con hablantes de lengua indígena	Náhuatl	SI	NO	NO	NO	NO	Agricultura	NE	NE	NO	NO	NO	NO	NO	Falta de otros servicios o equipamiento	NA	NA	NA	NA	NA	NA	NA	NA	NA	NA	NA	NA	NA	NA	NA	NA	NA	NA	NA
12	Guerrero	007	Arcelia	0088	Las Piñas	1001155	181442	0665	Terracería	Conexa a carretera	No hay transporte	No hay transporte	No hay transporte	No hay transporte	Sin hablantes de lengua indígena	Sin hablantes de lengua indígena	Sin hablantes de lengua indígena	Sin hablantes de lengua indígena	Sin hablantes de lengua indígena	Sin hablantes de lengua indígena	Sin hablantes de lengua indígena	Agricultura	Agricultura	NE	NO	NO	NO	NO	NO	Falta de energía eléctrica	NA	NA	NA	NA	NA	NA	NA	NA	NA	NA	NA	NA	NA	NA	NA	NA	NA	NA	NA
12	Guerrero	007	Arcelia	0093	La Cofradía	1001544	181824	0410	Terracería	Conexa a carretera	Micro, combi o camioneta	De 10 a 14 min	De 1 a 5 salidas al día	De 3 a 6 pesos	Sin hablantes de lengua indígena	Sin hablantes de lengua indígena	Sin hablantes de lengua indígena	Sin hablantes de lengua indígena	Sin hablantes de lengua indígena	Sin hablantes de lengua indígena	Sin hablantes de lengua indígena	Agricultura	Agricultura	NE	NO	NO	NO	NO	NO	Falta de infraestructura o servicio de agua	NA	NA	NA	NA	NA	NA	NA	NA	NA	NA	NA	NA	NA	NA	NA	NA	NA	NA	NA
12	Guerrero	007	Arcelia	0098	La Parota del Ocote	1000608	181133	1238	No conexa a carretera	De 1 a 3 km	No hay transporte	No hay transporte	No hay transporte	No hay transporte	Sin hablantes de lengua indígena	Sin hablantes de lengua indígena	Sin hablantes de lengua indígena	Sin hablantes de lengua indígena	Sin hablantes de lengua indígena	Sin hablantes de lengua indígena	Sin hablantes de lengua indígena	Agricultura	NE	NE	NO	NO	NO	NO	NO	Falta de energía eléctrica	NA	NA	NA	NA	NA	NA	NA	NA	NA	NA	NA	NA	NA	NA	NA	NA	NA	NA	NA
12	Guerrero	007	Arcelia	0099	Zitlaltengo	1000727	181908	0849	Terracería	Conexa a carretera	Camión de redilas o troca	Más de 1 y hasta 1.5 horas	De 1 a 5 salidas al día	De 40 a 49 pesos	Sin hablantes de lengua indígena	Sin hablantes de lengua indígena	Sin hablantes de lengua indígena	Sin hablantes de lengua indígena	Sin hablantes de lengua indígena	Sin hablantes de lengua indígena	Sin hablantes de lengua indígena	Agricultura	NE	NE	NO	NO	NO	NO	NO	Falta de empleo o emigración	NA	NA	NA	NA	NA	NA	NA	NA	NA	NA	NA	NA	NA	NA	NA	NA	NA	NA	NA
12	Guerrero	007	Arcelia	0104	El Varal (El Brinco)	1001553	181616	0441	Terracería	Conexa a carretera	Micro, combi o camioneta	De 20 a 24 min	De 1 a 5 salidas al día	De 10 a 14 pesos	Sin hablantes de lengua indígena	Sin hablantes de lengua indígena	Sin hablantes de lengua indígena	Sin hablantes de lengua indígena	Sin hablantes de lengua indígena	Sin hablantes de lengua indígena	Sin hablantes de lengua indígena	Agricultura	Agricultura	Agricultura	NO	NO	NO	NO	NO	Falta de infraestructura o servicio de agua	NE	Disponibilidad de red de agua NE	NE	Disponibilidad NE	NE	NE	Recolección y limpieza NE	NE	NE	NE	NE	NE	NE	NE	NE	NE	NE	NE	NE
12	Guerrero	007	Arcelia	0109	El Ocotito	1000541	181623	1431	Terracería	Conexa a carretera	Micro, combi o camioneta	Más de 1.5 y hasta 2 horas	De 1 a 5 salidas al día	De 50 a 59 pesos	Sin hablantes de lengua indígena	Sin hablantes de lengua indígena	Sin hablantes de lengua indígena	Sin hablantes de lengua indígena	Sin hablantes de lengua indígena	Sin hablantes de lengua indígena	Sin hablantes de lengua indígena	Agricultura	NE	NE	NO	NO	NO	NO	NO	Falta de infraestructura o servicio de agua	NA	NA	NA	NA	NA	NA	NA	NA	NA	NA	NA	NA	NA	NA	NA	NA	NA	NA	NA
12	Guerrero	007	Arcelia	0111	La Concordia	1000523	181710	1458	Terracería	Conexa a carretera	Micro, combi o camioneta	Más de 1.5 y hasta 2 horas	De 1 a 5 salidas al día	De 50 a 59 pesos	Con hablantes de lengua indígena	Náhuatl	SI	NO	NO	NO	NO	Agricultura	Cría y explotación de animales	NE	NO	NO	NO	NO	NO	Falta de infraestructura o servicio de agua	SI	Disponible sin cobro	NO	Red de drenaje no disponible	NO	NO	No hay recolección	SI	SI	SI	SI	SI	SI	SI	NO	SI	NO	NO	SI
12	Guerrero	007	Arcelia	0112	Huayatengo	1000423	181636	1110	No conexa a carretera	Distancia NE	Disponibilidad de transporte NE	Disponibilidad de transporte NE	Disponibilidad de transporte NE	Disponibilidad de transporte NE	Con hablantes de lengua indígena	Náhuatl	NE	NO	NO	NO	NO	Agricultura	NE	NE	NO	NO	NO	NO	NO	Falta de energía eléctrica	NA	NA	NA	NA	NA	NA	NA	NA	NA	NA	NA	NA	NA	NA	NA	NA	NA	NA	NA
12	Guerrero	007	Arcelia	0113	San Andrés	1000717	181613	1129	Terracería	Conexa a carretera	Micro, combi o camioneta	Más de 1.5 y hasta 2 horas	De 1 a 5 salidas al día	De 60 a 74 pesos	Sin hablantes de lengua indígena	Sin hablantes de lengua indígena	Sin hablantes de lengua indígena	Sin hablantes de lengua indígena	Sin hablantes de lengua indígena	Sin hablantes de lengua indígena	Sin hablantes de lengua indígena	Agricultura	NE	NE	NO	NO	NO	NO	NO	Falta de infraestructura o servicio de agua	NA	NA	NA	NA	NA	NA	NA	NA	NA	NA	NA	NA	NA	NA	NA	NA	NA	NA	NA
12	Guerrero	007	Arcelia	0115	Zopilotepec	1001004	181322	0916	Terracería	Conexa a carretera	No hay transporte	No hay transporte	No hay transporte	No hay transporte	Sin hablantes de lengua indígena	Sin hablantes de lengua indígena	Sin hablantes de lengua indígena	Sin hablantes de lengua indígena	Sin hablantes de lengua indígena	Sin hablantes de lengua indígena	Sin hablantes de lengua indígena	Agricultura	Descripciones insuficientemente especificadas de minerales metálicos y no metálicos	NE	NO	NO	NO	NO	NO	Falta de infraestructura o servicio de agua	NA	NA	NA	NA	NA	NA	NA	NA	NA	NA	NA	NA	NA	NA	NA	NA	NA	NA	NA
12	Guerrero	007	Arcelia	0118	El Sueño	1001025	181324	0901	Terracería	Conexa a carretera	No hay transporte	No hay transporte	No hay transporte	No hay transporte	Sin hablantes de lengua indígena	Sin hablantes de lengua indígena	Sin hablantes de lengua indígena	Sin hablantes de lengua indígena	Sin hablantes de lengua indígena	Sin hablantes de lengua indígena	Sin hablantes de lengua indígena	Agricultura	Agricultura	NE	NO	NO	NO	NO	NO	Falta de infraestructura o servicio de agua	NA	NA	NA	NA	NA	NA	NA	NA	NA	NA	NA	NA	NA	NA	NA	NA	NA	NA	NA
12	Guerrero	007	Arcelia	0119	Rincón del Cerro	1000747	181526	1112	Terracería	Conexa a carretera	No hay transporte	No hay transporte	No hay transporte	No hay transporte	Sin hablantes de lengua indígena	Sin hablantes de lengua indígena	Sin hablantes de lengua indígena	Sin hablantes de lengua indígena	Sin hablantes de lengua indígena	Sin hablantes de lengua indígena	Sin hablantes de lengua indígena	Agricultura	NE	NE	NO	NO	NO	NO	NO	Falta de energía eléctrica	NA	NA	NA	NA	NA	NA	NA	NA	NA	NA	NA	NA	NA	NA	NA	NA	NA	NA	NA
12	Guerrero	007	Arcelia	0121	El Mango	1000946	181016	1118	No conexa a carretera	De 1 a 3 km	No hay transporte	No hay transporte	No hay transporte	No hay transporte	Sin hablantes de lengua indígena	Sin hablantes de lengua indígena	Sin hablantes de lengua indígena	Sin hablantes de lengua indígena	Sin hablantes de lengua indígena	Sin hablantes de lengua indígena	Sin hablantes de lengua indígena	Agricultura	NE	NE	NO	NO	NO	NO	NO	Falta de energía eléctrica	NA	NA	NA	NA	NA	NA	NA	NA	NA	NA	NA	NA	NA	NA	NA	NA	NA	NA	NA
12	Guerrero	007	Arcelia	0125	La Parotita	1000742	181246	1495	Terracería	Conexa a carretera	No hay transporte	No hay transporte	No hay transporte	No hay transporte	Sin hablantes de lengua indígena	Sin hablantes de lengua indígena	Sin hablantes de lengua indígena	Sin hablantes de lengua indígena	Sin hablantes de lengua indígena	Sin hablantes de lengua indígena	Sin hablantes de lengua indígena	Agricultura	Descripciones insuficientemente especificadas de minerales metálicos y no metálicos	NE	NO	NO	NO	NO	NO	Falta de energía eléctrica	NA	NA	NA	NA	NA	NA	NA	NA	NA	NA	NA	NA	NA	NA	NA	NA	NA	NA	NA
12	Guerrero	007	Arcelia	0128	Buenos Aires	1001001	181538	1061	No conexa a carretera	De 1 a 3 km	No hay transporte	No hay transporte	No hay transporte	No hay transporte	Con hablantes de lengua indígena	Náhuatl	SI	NO	NO	SI	NO	Agricultura	NE	NE	NO	NO	NO	NO	NO	Falta de carretera o transporte	NA	NA	NA	NA	NA	NA	NA	NA	NA	NA	NA	NA	NA	NA	NA	NA	NA	NA	NA
12	Guerrero	007	Arcelia	0131	El Cirián	1000645	181442	1189	Terracería	Conexa a carretera	No hay transporte	No hay transporte	No hay transporte	No hay transporte	Con hablantes de lengua indígena	Náhuatl	SI	NO	SI	SI	SI	Agricultura	Agricultura	NE	NO	NO	NO	SI	NO	Delincuencia o inseguridad	NA	NA	NA	NA	NA	NA	NA	NA	NA	NA	NA	NA	NA	NA	NA	NA	NA	NA	NA
12	Guerrero	007	Arcelia	0132	Zumpango	1000920	181535	0946	Terracería	Conexa a carretera	Micro, combi o camioneta	Más de 1.5 y hasta 2 horas	De 1 a 5 salidas al día	De 50 a 59 pesos	Con hablantes de lengua indígena	Náhuatl	SI	NO	SI	SI	NO	Agricultura	Agricultura	Agricultura	NO	NO	NO	NO	NO	Falta de energía eléctrica	NA	NA	NA	NA	NA	NA	NA	NA	NA	NA	NA	NA	NA	NA	NA	NA	NA	NA	NA
12	Guerrero	007	Arcelia	0133	El Guayabo	1001639	180932	0340	Terracería	Conexa a carretera	Camión de redilas o troca	De 30 a 60 min	De 1 a 5 salidas al día	De 35 a 39 pesos	Sin hablantes de lengua indígena	Sin hablantes de lengua indígena	Sin hablantes de lengua indígena	Sin hablantes de lengua indígena	Sin hablantes de lengua indígena	Sin hablantes de lengua indígena	Sin hablantes de lengua indígena	Agricultura	Agricultura	Cría y explotación de animales	NO	NO	NO	NO	NO	Delincuencia o inseguridad	SI	Disponible con cobro	NO	Red de drenaje no disponible	NO	NO	No hay recolección	SI	SI	NO	SI	SI	SI	NO	NO	NO	NO	NO	SI
12	Guerrero	007	Arcelia	0134	El Amate	1000848	181453	1285	No conexa a carretera	De 4 a 10 km	No hay transporte	No hay transporte	No hay transporte	No hay transporte	Con hablantes de lengua indígena	Náhuatl	NE	NE	NE	NE	NE	Agricultura	Agricultura	Agricultura	NO	NO	NO	NO	NO	Falta de energía eléctrica	NA	NA	NA	NA	NA	NA	NA	NA	NA	NA	NA	NA	NA	NA	NA	NA	NA	NA	NA
12	Guerrero	007	Arcelia	0135	El Puerto del Tepehuaje	1001112	181140	1136	Terracería	Conexa a carretera	No hay transporte	No hay transporte	No hay transporte	No hay transporte	Sin hablantes de lengua indígena	Sin hablantes de lengua indígena	Sin hablantes de lengua indígena	Sin hablantes de lengua indígena	Sin hablantes de lengua indígena	Sin hablantes de lengua indígena	Sin hablantes de lengua indígena	Agricultura	NE	NE	NO	NO	NO	NO	NO	Falta de energía eléctrica	NA	NA	NA	NA	NA	NA	NA	NA	NA	NA	NA	NA	NA	NA	NA	NA	NA	NA	NA
12	Guerrero	007	Arcelia	0136	El Varillo	1001247	181227	0849	No conexa a carretera	De 1 a 3 km	No hay transporte	No hay transporte	No hay transporte	No hay transporte	Sin hablantes de lengua indígena	Sin hablantes de lengua indígena	Sin hablantes de lengua indígena	Sin hablantes de lengua indígena	Sin hablantes de lengua indígena	Sin hablantes de lengua indígena	Sin hablantes de lengua indígena	Agricultura	NE	NE	NO	NO	NO	NO	NO	Falta de energía eléctrica	NA	NA	NA	NA	NA	NA	NA	NA	NA	NA	NA	NA	NA	NA	NA	NA	NA	NA	NA
12	Guerrero	007	Arcelia	0139	La Solana (La Huerta)	1001132	181254	0634	Terracería	Conexa a carretera	Micro, combi o camioneta	Más de 1.5 y hasta 2 horas	De 1 a 5 salidas al día	De 40 a 49 pesos	Sin hablantes de lengua indígena	Sin hablantes de lengua indígena	Sin hablantes de lengua indígena	Sin hablantes de lengua indígena	Sin hablantes de lengua indígena	Sin hablantes de lengua indígena	Sin hablantes de lengua indígena	Agricultura	Agricultura	Agricultura	NO	NO	NO	NO	NO	Falta de infraestructura o servicio de agua	NA	NA	NA	NA	NA	NA	NA	NA	NA	NA	NA	NA	NA	NA	NA	NA	NA	NA	NA
12	Guerrero	007	Arcelia	0140	Piedra Grande	1001017	181003	0780	No conexa a carretera	De 4 a 10 km	No hay transporte	No hay transporte	No hay transporte	No hay transporte	Sin hablantes de lengua indígena	Sin hablantes de lengua indígena	Sin hablantes de lengua indígena	Sin hablantes de lengua indígena	Sin hablantes de lengua indígena	Sin hablantes de lengua indígena	Sin hablantes de lengua indígena	Agricultura	Agricultura	Cría y explotación de animales	NO	NO	NO	NO	NO	Falta de empleo o emigración	NA	NA	NA	NA	NA	NA	NA	NA	NA	NA	NA	NA	NA	NA	NA	NA	NA	NA	NA
12	Guerrero	007	Arcelia	0142	Guerrero (Guerrerito)	1000848	181021	1277	Terracería	Conexa a carretera	No hay transporte	No hay transporte	No hay transporte	No hay transporte	Sin hablantes de lengua indígena	Sin hablantes de lengua indígena	Sin hablantes de lengua indígena	Sin hablantes de lengua indígena	Sin hablantes de lengua indígena	Sin hablantes de lengua indígena	Sin hablantes de lengua indígena	Agricultura	NE	NE	NO	NO	NO	NO	NO	Falta de energía eléctrica	NA	NA	NA	NA	NA	NA	NA	NA	NA	NA	NA	NA	NA	NA	NA	NA	NA	NA	NA
12	Guerrero	007	Arcelia	0143	Paraje Suriano	1000914	180849	1173	Terracería	Conexa a carretera	Micro, combi o camioneta	Más de 3 y hasta 4 horas	De 1 a 5 salidas al día	De 75 a 99 pesos	Sin hablantes de lengua indígena	Sin hablantes de lengua indígena	Sin hablantes de lengua indígena	Sin hablantes de lengua indígena	Sin hablantes de lengua indígena	Sin hablantes de lengua indígena	Sin hablantes de lengua indígena	Agricultura	NE	NE	NO	NO	NO	NO	NO	Falta de empleo o emigración	NA	NA	NA	NA	NA	NA	NA	NA	NA	NA	NA	NA	NA	NA	NA	NA	NA	NA	NA
12	Guerrero	007	Arcelia	0144	El Progreso (Zapotitlán)	1001605	180730	0356	Terracería	Conexa a carretera	Micro, combi o camioneta	Más de 1 y hasta 1.5 horas	De 1 a 5 salidas al día	De 40 a 49 pesos	Sin hablantes de lengua indígena	Sin hablantes de lengua indígena	Sin hablantes de lengua indígena	Sin hablantes de lengua indígena	Sin hablantes de lengua indígena	Sin hablantes de lengua indígena	Sin hablantes de lengua indígena	Agricultura	Agricultura	Cría y explotación de animales	NO	NO	NO	NO	NO	Falta de recursos económicos	NE	Disponibilidad de red de agua NE	NE	Disponibilidad NE	NE	NE	Recolección y limpieza NE	NE	NE	NE	NE	NE	NE	NE	NE	NE	NE	NE	NE
12	Guerrero	007	Arcelia	0147	El Cajete	1001119	181224	0754	Terracería	Conexa a carretera	No hay transporte	No hay transporte	No hay transporte	No hay transporte	Sin hablantes de lengua indígena	Sin hablantes de lengua indígena	Sin hablantes de lengua indígena	Sin hablantes de lengua indígena	Sin hablantes de lengua indígena	Sin hablantes de lengua indígena	Sin hablantes de lengua indígena	Agricultura	NE	NE	NO	NO	NO	NO	NO	Falta de energía eléctrica	NA	NA	NA	NA	NA	NA	NA	NA	NA	NA	NA	NA	NA	NA	NA	NA	NA	NA	NA
12	Guerrero	007	Arcelia	0150	Ixtepec	1000623	181505	1251	No conexa a carretera	De 1 a 3 km	No hay transporte	No hay transporte	No hay transporte	No hay transporte	Sin hablantes de lengua indígena	Sin hablantes de lengua indígena	Sin hablantes de lengua indígena	Sin hablantes de lengua indígena	Sin hablantes de lengua indígena	Sin hablantes de lengua indígena	Sin hablantes de lengua indígena	Agricultura	NE	NE	NO	NO	NO	NO	NO	Falta de energía eléctrica	NA	NA	NA	NA	NA	NA	NA	NA	NA	NA	NA	NA	NA	NA	NA	NA	NA	NA	NA
12	Guerrero	007	Arcelia	0153	El Limón	1000936	181416	1163	No conexa a carretera	De 1 a 3 km	No hay transporte	No hay transporte	No hay transporte	No hay transporte	Sin hablantes de lengua indígena	Sin hablantes de lengua indígena	Sin hablantes de lengua indígena	Sin hablantes de lengua indígena	Sin hablantes de lengua indígena	Sin hablantes de lengua indígena	Sin hablantes de lengua indígena	Agricultura	NE	NE	NO	NO	NO	NO	NO	Falta de energía eléctrica	NA	NA	NA	NA	NA	NA	NA	NA	NA	NA	NA	NA	NA	NA	NA	NA	NA	NA	NA
12	Guerrero	007	Arcelia	0154	La Laguna	1001038	181215	1015	No conexa a carretera	Distancia NE	No hay transporte	No hay transporte	No hay transporte	No hay transporte	Sin hablantes de lengua indígena	Sin hablantes de lengua indígena	Sin hablantes de lengua indígena	Sin hablantes de lengua indígena	Sin hablantes de lengua indígena	Sin hablantes de lengua indígena	Sin hablantes de lengua indígena	Agricultura	NE	NE	NO	NO	NO	NO	NO	Falta de energía eléctrica	NA	NA	NA	NA	NA	NA	NA	NA	NA	NA	NA	NA	NA	NA	NA	NA	NA	NA	NA
12	Guerrero	007	Arcelia	0155	Paraje Nuevo	1000506	181907	1284	Terracería	Conexa a carretera	Micro, combi o camioneta	Más de 1 y hasta 1.5 horas	De 1 a 5 salidas al día	De 50 a 59 pesos	Con hablantes de lengua indígena	Náhuatl	SI	NO	NO	NO	NO	Agricultura	Cría y explotación de animales	Cría y explotación de animales	NO	NO	NO	NO	NO	Falta de empleo o emigración	NA	NA	NA	NA	NA	NA	NA	NA	NA	NA	NA	NA	NA	NA	NA	NA	NA	NA	NA
12	Guerrero	007	Arcelia	0156	La Parota Campo Morado	1000748	181140	1211	Terracería	Conexa a carretera	No hay transporte	No hay transporte	No hay transporte	No hay transporte	Sin hablantes de lengua indígena	Sin hablantes de lengua indígena	Sin hablantes de lengua indígena	Sin hablantes de lengua indígena	Sin hablantes de lengua indígena	Sin hablantes de lengua indígena	Sin hablantes de lengua indígena	Agricultura	Agricultura	NE	NO	NO	NO	NO	NO	Falta de infraestructura o servicio de agua	NA	NA	NA	NA	NA	NA	NA	NA	NA	NA	NA	NA	NA	NA	NA	NA	NA	NA	NA
12	Guerrero	007	Arcelia	0158	Villa Guadalupe Victoria (Parota Guadalupe)	1000923	181736	0965	Terracería	Conexa a carretera	Micro, combi o camioneta	De 30 a 60 min	De 1 a 5 salidas al día	De 50 a 59 pesos	Con hablantes de lengua indígena	Náhuatl	SI	NO	NO	SI	SI	Agricultura	Agricultura	NE	NO	NO	NO	NO	NO	Falta de infraestructura o servicio de agua	NA	NA	NA	NA	NA	NA	NA	NA	NA	NA	NA	NA	NA	NA	NA	NA	NA	NA	NA
12	Guerrero	007	Arcelia	0162	Colonia Terrero Blanco	1001108	182030	0953	Terracería	Conexa a carretera	No hay transporte	No hay transporte	No hay transporte	No hay transporte	Sin hablantes de lengua indígena	Sin hablantes de lengua indígena	Sin hablantes de lengua indígena	Sin hablantes de lengua indígena	Sin hablantes de lengua indígena	Sin hablantes de lengua indígena	Sin hablantes de lengua indígena	Agricultura	Agricultura	NE	NO	NO	NO	NO	NO	Falta de infraestructura o servicio de agua	NA	NA	NA	NA	NA	NA	NA	NA	NA	NA	NA	NA	NA	NA	NA	NA	NA	NA	NA
12	Guerrero	007	Arcelia	0163	Vista Hermosa	1000720	181525	1248	Terracería	Conexa a carretera	No hay transporte	No hay transporte	No hay transporte	No hay transporte	Con hablantes de lengua indígena	Náhuatl	SI	NO	SI	SI	NO	Agricultura	NE	NE	NO	NO	NO	NO	NO	Falta de infraestructura o servicio de agua	NA	NA	NA	NA	NA	NA	NA	NA	NA	NA	NA	NA	NA	NA	NA	NA	NA	NA	NA
12	Guerrero	007	Arcelia	0168	Colonia Emperador Cuauhtémoc	1001737	181740	0399	Terracería	Conexa a carretera	Micro, combi o camioneta	De 20 a 24 min	De 6 a 10 salidas al día	De 3 a 6 pesos	Sin hablantes de lengua indígena	Sin hablantes de lengua indígena	Sin hablantes de lengua indígena	Sin hablantes de lengua indígena	Sin hablantes de lengua indígena	Sin hablantes de lengua indígena	Sin hablantes de lengua indígena	Agricultura	Agricultura	Insuficientemente especificado del sector construcción	NO	NO	NO	SI	SI	Falta de empleo o emigración	SI	Disponible con cobro	NO	Red de drenaje no disponible	SI	SI	Depositan la basura a cielo abierto	SI	NO	SI	NO	NO	SI	NO	NO	NO	NO	NO	SI
12	Guerrero	007	Arcelia	0173	La Huerta	1001522	181814	0421	Terracería	Conexa a carretera	Micro, combi o camioneta	DE 15 A 19 MIN	De 1 a 5 salidas al día	De 10 a 14 pesos	Sin hablantes de lengua indígena	Sin hablantes de lengua indígena	Sin hablantes de lengua indígena	Sin hablantes de lengua indígena	Sin hablantes de lengua indígena	Sin hablantes de lengua indígena	Sin hablantes de lengua indígena	Agricultura	NE	NE	NO	NO	NO	NO	NO	Sin problema	NA	NA	NA	NA	NA	NA	NA	NA	NA	NA	NA	NA	NA	NA	NA	NA	NA	NA	NA
12	Guerrero	007	Arcelia	0179	Las Cañitas	1001110	181914	0630	Terracería	Conexa a carretera	No hay transporte	No hay transporte	No hay transporte	No hay transporte	Sin hablantes de lengua indígena	Sin hablantes de lengua indígena	Sin hablantes de lengua indígena	Sin hablantes de lengua indígena	Sin hablantes de lengua indígena	Sin hablantes de lengua indígena	Sin hablantes de lengua indígena	Agricultura	Agricultura	NE	NO	NO	NO	NO	NO	Falta de infraestructura o servicio de agua	NA	NA	NA	NA	NA	NA	NA	NA	NA	NA	NA	NA	NA	NA	NA	NA	NA	NA	NA
12	Guerrero	007	Arcelia	0182	Cuadrilla Ascencio	1000730	181314	1321	Terracería	Conexa a carretera	No hay transporte	No hay transporte	No hay transporte	No hay transporte	Sin hablantes de lengua indígena	Sin hablantes de lengua indígena	Sin hablantes de lengua indígena	Sin hablantes de lengua indígena	Sin hablantes de lengua indígena	Sin hablantes de lengua indígena	Sin hablantes de lengua indígena	Agricultura	Agricultura	Descripciones insuficientemente especificadas de minerales metálicos y no metálicos	NO	NO	NO	NO	NO	Falta de energía eléctrica	NA	NA	NA	NA	NA	NA	NA	NA	NA	NA	NA	NA	NA	NA	NA	NA	NA	NA	NA
12	Guerrero	007	Arcelia	0183	El Manguito	1001535	182025	0471	Terracería	Conexa a carretera	Micro, combi o camioneta	De 30 a 60 min	De 1 a 5 salidas al día	De 25 a 29 pesos	Sin hablantes de lengua indígena	Sin hablantes de lengua indígena	Sin hablantes de lengua indígena	Sin hablantes de lengua indígena	Sin hablantes de lengua indígena	Sin hablantes de lengua indígena	Sin hablantes de lengua indígena	Agricultura	NE	NE	NO	NO	NO	NO	NO	Falta de infraestructura o servicio de agua	NA	NA	NA	NA	NA	NA	NA	NA	NA	NA	NA	NA	NA	NA	NA	NA	NA	NA	NA
12	Guerrero	007	Arcelia	0188	La Reforma	1000802	181552	1084	Terracería	Conexa a carretera	No hay transporte	No hay transporte	No hay transporte	No hay transporte	Sin hablantes de lengua indígena	Sin hablantes de lengua indígena	Sin hablantes de lengua indígena	Sin hablantes de lengua indígena	Sin hablantes de lengua indígena	Sin hablantes de lengua indígena	Sin hablantes de lengua indígena	Agricultura	Agricultura	NE	NO	NO	NO	NO	NO	Falta de energía eléctrica	NA	NA	NA	NA	NA	NA	NA	NA	NA	NA	NA	NA	NA	NA	NA	NA	NA	NA	NA
12	Guerrero	007	Arcelia	0189	Ninguno [Centro de Bachillerato Técnico Agrícola]	1001803	181753	0398	NE	Conexión a carretera NE	Disponibilidad de transporte NE	Disponibilidad de transporte NE	Disponibilidad de transporte NE	Disponibilidad de transporte NE	NE	Hablantes de lengua indígena NE	Hablantes de lengua indígena NE	Hablantes de lengua indígena NE	Hablantes de lengua indígena NE	Hablantes de lengua indígena NE	Hablantes de lengua indígena NE	NE	NE	NE	NE	NE	NE	NE	NE	No especificado	NA	NA	NA	NA	NA	NA	NA	NA	NA	NA	NA	NA	NA	NA	NA	NA	NA	NA	NA
12	Guerrero	007	Arcelia	0190	Las Chivas	1000644	182032	1031	No conexa a carretera	Distancia NE	No hay transporte	No hay transporte	No hay transporte	No hay transporte	Sin hablantes de lengua indígena	Sin hablantes de lengua indígena	Sin hablantes de lengua indígena	Sin hablantes de lengua indígena	Sin hablantes de lengua indígena	Sin hablantes de lengua indígena	Sin hablantes de lengua indígena	Agricultura	Agricultura	NE	SI	NO	NO	NO	NO	Falta de infraestructura o servicio de agua	NA	NA	NA	NA	NA	NA	NA	NA	NA	NA	NA	NA	NA	NA	NA	NA	NA	NA	NA
12	Guerrero	007	Arcelia	0191	Huerta Piedras Negras	1001854	181406	0360	Terracería	Conexa a carretera	Micro, combi o camioneta	De 30 a 60 min	Sin salidas diarias	De 15 a 19 pesos	Sin hablantes de lengua indígena	Sin hablantes de lengua indígena	Sin hablantes de lengua indígena	Sin hablantes de lengua indígena	Sin hablantes de lengua indígena	Sin hablantes de lengua indígena	Sin hablantes de lengua indígena	Agricultura	Cría y explotación de animales	NE	NO	NO	NO	NO	NO	Falta de empleo o emigración	NA	NA	NA	NA	NA	NA	NA	NA	NA	NA	NA	NA	NA	NA	NA	NA	NA	NA	NA
12	Guerrero	007	Arcelia	0192	Las Juntas	1001137	181316	0646	Terracería	Conexa a carretera	Micro, combi o camioneta	Más de 1.5 y hasta 2 horas	De 1 a 5 salidas al día	De 35 a 39 pesos	Sin hablantes de lengua indígena	Sin hablantes de lengua indígena	Sin hablantes de lengua indígena	Sin hablantes de lengua indígena	Sin hablantes de lengua indígena	Sin hablantes de lengua indígena	Sin hablantes de lengua indígena	Agricultura	Agricultura	NE	NO	NO	NO	NO	NO	Falta de otros servicios o equipamiento	NA	NA	NA	NA	NA	NA	NA	NA	NA	NA	NA	NA	NA	NA	NA	NA	NA	NA	NA
12	Guerrero	007	Arcelia	0195	Los Martínez	1001123	181919	0673	NE	Conexión a carretera NE	Disponibilidad de transporte NE	Disponibilidad de transporte NE	Disponibilidad de transporte NE	Disponibilidad de transporte NE	NE	Hablantes de lengua indígena NE	Hablantes de lengua indígena NE	Hablantes de lengua indígena NE	Hablantes de lengua indígena NE	Hablantes de lengua indígena NE	Hablantes de lengua indígena NE	NE	NE	NE	NE	NE	NE	NE	NE	No especificado	NA	NA	NA	NA	NA	NA	NA	NA	NA	NA	NA	NA	NA	NA	NA	NA	NA	NA	NA
12	Guerrero	007	Arcelia	0197	Nueva Senda	1001107	181149	1042	Terracería	Conexa a carretera	No hay transporte	No hay transporte	No hay transporte	No hay transporte	Sin hablantes de lengua indígena	Sin hablantes de lengua indígena	Sin hablantes de lengua indígena	Sin hablantes de lengua indígena	Sin hablantes de lengua indígena	Sin hablantes de lengua indígena	Sin hablantes de lengua indígena	Agricultura	NE	NE	NO	NO	NO	NO	NO	Falta de energía eléctrica	NA	NA	NA	NA	NA	NA	NA	NA	NA	NA	NA	NA	NA	NA	NA	NA	NA	NA	NA
12	Guerrero	007	Arcelia	0198	Las Palmas (La Pinzanera)	1001157	181323	0607	Terracería	Conexa a carretera	Micro, combi o camioneta	Más de 1 y hasta 1.5 horas	De 1 a 5 salidas al día	De 35 a 39 pesos	Sin hablantes de lengua indígena	Sin hablantes de lengua indígena	Sin hablantes de lengua indígena	Sin hablantes de lengua indígena	Sin hablantes de lengua indígena	Sin hablantes de lengua indígena	Sin hablantes de lengua indígena	Agricultura	Agricultura	NE	NO	NO	NO	NO	NO	Falta de infraestructura o servicio de agua	NA	NA	NA	NA	NA	NA	NA	NA	NA	NA	NA	NA	NA	NA	NA	NA	NA	NA	NA
12	Guerrero	007	Arcelia	0200	Presa Palos Altos	1001546	182244	0417	No conexa a carretera	Distancia NE	Micro, combi o camioneta	De 20 a 24 min	De 11 a 20 salidas al día	De 7 a 9 pesos	Sin hablantes de lengua indígena	Sin hablantes de lengua indígena	Sin hablantes de lengua indígena	Sin hablantes de lengua indígena	Sin hablantes de lengua indígena	Sin hablantes de lengua indígena	Sin hablantes de lengua indígena	Pesca	Agricultura	NE	NO	NO	NO	NO	NO	Falta de empleo o emigración	NA	NA	NA	NA	NA	NA	NA	NA	NA	NA	NA	NA	NA	NA	NA	NA	NA	NA	NA
12	Guerrero	007	Arcelia	0204	El Rincón	1001134	181140	1138	No conexa a carretera	De 1 a 3 km	No hay transporte	No hay transporte	No hay transporte	No hay transporte	Sin hablantes de lengua indígena	Sin hablantes de lengua indígena	Sin hablantes de lengua indígena	Sin hablantes de lengua indígena	Sin hablantes de lengua indígena	Sin hablantes de lengua indígena	Sin hablantes de lengua indígena	Agricultura	NE	NE	NO	NO	NO	NO	NO	Falta de energía eléctrica	NA	NA	NA	NA	NA	NA	NA	NA	NA	NA	NA	NA	NA	NA	NA	NA	NA	NA	NA
12	Guerrero	007	Arcelia	0205	Reforma de Lázaro Cárdenas (El Aterrizaje)	1001709	181736	0400	Terracería	Conexa a carretera	Micro, combi o camioneta	DE 15 A 19 MIN	De 21 a 30 salidas al día	De 3 a 6 pesos	Sin hablantes de lengua indígena	Sin hablantes de lengua indígena	Sin hablantes de lengua indígena	Sin hablantes de lengua indígena	Sin hablantes de lengua indígena	Sin hablantes de lengua indígena	Sin hablantes de lengua indígena	Agricultura	Trabajos de albañilería de instalaciones hidrosanitarias y eléctricas y de trabajos en exteriores	NE	SI	NO	NO	NO	SI	Falta de energía eléctrica	SI	Disponible con cobro	NO	Red de drenaje no disponible	NO	NO	No hay recolección	SI	NO	NO	NO	NO	NO	NO	NO	NO	NO	NO	SI
12	Guerrero	007	Arcelia	0206	Tlanilpa el Nuevo	1000919	182023	0632	Terracería	Conexa a carretera	No hay transporte	No hay transporte	No hay transporte	No hay transporte	Sin hablantes de lengua indígena	Sin hablantes de lengua indígena	Sin hablantes de lengua indígena	Sin hablantes de lengua indígena	Sin hablantes de lengua indígena	Sin hablantes de lengua indígena	Sin hablantes de lengua indígena	Agricultura	NE	NE	NO	NO	NO	NO	NO	Falta de energía eléctrica	NA	NA	NA	NA	NA	NA	NA	NA	NA	NA	NA	NA	NA	NA	NA	NA	NA	NA	NA
12	Guerrero	007	Arcelia	0207	Colonia Progreso	1001708	181808	0400	Terracería	Conexa a carretera	No hay transporte	No hay transporte	No hay transporte	No hay transporte	Sin hablantes de lengua indígena	Sin hablantes de lengua indígena	Sin hablantes de lengua indígena	Sin hablantes de lengua indígena	Sin hablantes de lengua indígena	Sin hablantes de lengua indígena	Sin hablantes de lengua indígena	Agricultura	Agricultura	NE	NO	NO	NO	NO	NO	Falta de energía eléctrica	NA	NA	NA	NA	NA	NA	NA	NA	NA	NA	NA	NA	NA	NA	NA	NA	NA	NA	NA
12	Guerrero	007	Arcelia	0209	Colonia la Minita	1001604	181905	0402	Terracería	Conexa a carretera	Micro, combi o camioneta	DE 15 A 19 MIN	De 6 a 10 salidas al día	De 3 a 6 pesos	Sin hablantes de lengua indígena	Sin hablantes de lengua indígena	Sin hablantes de lengua indígena	Sin hablantes de lengua indígena	Sin hablantes de lengua indígena	Sin hablantes de lengua indígena	Sin hablantes de lengua indígena	Agricultura	Insuficientemente especificado del sector comercio al por menor	NE	NO	NO	NO	NO	NE	Falta de otros servicios o equipamiento	NA	NA	NA	NA	NA	NA	NA	NA	NA	NA	NA	NA	NA	NA	NA	NA	NA	NA	NA
12	Guerrero	007	Arcelia	0213	Crucero Hacienda Nueva	1001753	181856	0380	Pavimentada	Conexa a carretera	Micro, combi o camioneta	DE 15 A 19 MIN	Más de 60 salidas	De 3 a 6 pesos	Sin hablantes de lengua indígena	Sin hablantes de lengua indígena	Sin hablantes de lengua indígena	Sin hablantes de lengua indígena	Sin hablantes de lengua indígena	Sin hablantes de lengua indígena	Sin hablantes de lengua indígena	Insuficientemente especificado del sector comercio al por menor	Artistas, escritores y técnicos independientes	NE	NO	NO	NO	SI	NO	Falta de infraestructura o servicio de agua	NA	NA	NA	NA	NA	NA	NA	NA	NA	NA	NA	NA	NA	NA	NA	NA	NA	NA	NA
12	Guerrero	007	Arcelia	0215	Tercer Milenio [Restaurante]	1001757	181834	0380	NE	Conexión a carretera NE	Disponibilidad de transporte NE	Disponibilidad de transporte NE	Disponibilidad de transporte NE	Disponibilidad de transporte NE	NE	Hablantes de lengua indígena NE	Hablantes de lengua indígena NE	Hablantes de lengua indígena NE	Hablantes de lengua indígena NE	Hablantes de lengua indígena NE	Hablantes de lengua indígena NE	NE	NE	NE	NE	NE	NE	NE	NE	No especificado	NA	NA	NA	NA	NA	NA	NA	NA	NA	NA	NA	NA	NA	NA	NA	NA	NA	NA	NA
12	Guerrero	007	Arcelia	0217	La Laguna	1001009	181851	0932	Terracería	Conexa a carretera	No hay transporte	No hay transporte	No hay transporte	No hay transporte	Sin hablantes de lengua indígena	Sin hablantes de lengua indígena	Sin hablantes de lengua indígena	Sin hablantes de lengua indígena	Sin hablantes de lengua indígena	Sin hablantes de lengua indígena	Sin hablantes de lengua indígena	Agricultura	Agricultura	NE	NO	NO	NO	NO	NO	Falta de infraestructura o servicio de agua	NA	NA	NA	NA	NA	NA	NA	NA	NA	NA	NA	NA	NA	NA	NA	NA	NA	NA	NA
12	Guerrero	007	Arcelia	0219	Rancho los Gemelos	1001823	181833	0380	Terracería	Conexa a carretera	No hay transporte	No hay transporte	No hay transporte	No hay transporte	Sin hablantes de lengua indígena	Sin hablantes de lengua indígena	Sin hablantes de lengua indígena	Sin hablantes de lengua indígena	Sin hablantes de lengua indígena	Sin hablantes de lengua indígena	Sin hablantes de lengua indígena	Cría y explotación de animales	Agricultura	Agricultura	NO	NO	NO	NO	NO	Falta de apoyo o deficiencia gubernamental	NA	NA	NA	NA	NA	NA	NA	NA	NA	NA	NA	NA	NA	NA	NA	NA	NA	NA	NA
12	Guerrero	007	Arcelia	0222	Ojo de Agua	1000915	180958	1074	No conexa a carretera	De 1 a 3 km	No hay transporte	No hay transporte	No hay transporte	No hay transporte	Sin hablantes de lengua indígena	Sin hablantes de lengua indígena	Sin hablantes de lengua indígena	Sin hablantes de lengua indígena	Sin hablantes de lengua indígena	Sin hablantes de lengua indígena	Sin hablantes de lengua indígena	Agricultura	NE	NE	NO	NO	NO	NO	NO	Falta de energía eléctrica	NA	NA	NA	NA	NA	NA	NA	NA	NA	NA	NA	NA	NA	NA	NA	NA	NA	NA	NA
12	Guerrero	007	Arcelia	0223	Las Palmas	1001041	181256	0742	Terracería	Conexa a carretera	No hay transporte	No hay transporte	No hay transporte	No hay transporte	Sin hablantes de lengua indígena	Sin hablantes de lengua indígena	Sin hablantes de lengua indígena	Sin hablantes de lengua indígena	Sin hablantes de lengua indígena	Sin hablantes de lengua indígena	Sin hablantes de lengua indígena	Agricultura	Agricultura	Agricultura	NO	NO	NO	NO	NO	Falta de otros servicios o equipamiento	NA	NA	NA	NA	NA	NA	NA	NA	NA	NA	NA	NA	NA	NA	NA	NA	NA	NA	NA
12	Guerrero	007	Arcelia	0227	Fraccionamiento Flores Magón	1001729	181804	0400	Pavimentada	Conexa a carretera	Micro, combi o camioneta	DE 15 A 19 MIN	De 31 a 60 salidas al día	De 3 a 6 pesos	Sin hablantes de lengua indígena	Sin hablantes de lengua indígena	Sin hablantes de lengua indígena	Sin hablantes de lengua indígena	Sin hablantes de lengua indígena	Sin hablantes de lengua indígena	Sin hablantes de lengua indígena	Insuficientemente especificado del sector comercio al por menor	Agricultura	NE	NO	NO	NO	NO	NO	Falta de otros servicios o equipamiento	NA	NA	NA	NA	NA	NA	NA	NA	NA	NA	NA	NA	NA	NA	NA	NA	NA	NA	NA
12	Guerrero	007	Arcelia	0228	Fraccionamiento un Nuevo Horizonte para Guerrero	1001729	181814	0400	Terracería	Conexa a carretera	Micro, combi o camioneta	De 20 a 24 min	De 31 a 60 salidas al día	De 3 a 6 pesos	Sin hablantes de lengua indígena	Sin hablantes de lengua indígena	Sin hablantes de lengua indígena	Sin hablantes de lengua indígena	Sin hablantes de lengua indígena	Sin hablantes de lengua indígena	Sin hablantes de lengua indígena	Insuficientemente especificado del sector servicios educativos	Comercio al por menor de abarrotes, alimentos, bebidas, hielo y tabaco	Comercio al por menor de abarrotes, alimentos, bebidas, hielo y tabaco	NO	NO	NO	NO	NO	Falta de otros servicios o equipamiento	NE	Disponibilidad de red de agua NE	NE	Disponibilidad NE	NE	NE	Recolección y limpieza NE	NE	NE	NE	NE	NE	NE	NE	NE	NE	NE	NE	NE
12	Guerrero	007	Arcelia	0229	Las Granjas	1001835	181859	0379	Pavimentada	Conexa a carretera	Micro, combi o camioneta	DE 15 A 19 MIN	De 6 a 10 salidas al día	De 7 a 9 pesos	Sin hablantes de lengua indígena	Sin hablantes de lengua indígena	Sin hablantes de lengua indígena	Sin hablantes de lengua indígena	Sin hablantes de lengua indígena	Sin hablantes de lengua indígena	Sin hablantes de lengua indígena	Cría y explotación de animales	Deportistas y equipos deportivos profesionales y semiprofesionales	NE	NO	NO	NO	NO	NO	Falta de infraestructura o servicio de agua	NA	NA	NA	NA	NA	NA	NA	NA	NA	NA	NA	NA	NA	NA	NA	NA	NA	NA	NA
12	Guerrero	007	Arcelia	0230	El Mal Paso	1001122	181245	0720	Terracería	Conexa a carretera	No hay transporte	No hay transporte	No hay transporte	No hay transporte	Sin hablantes de lengua indígena	Sin hablantes de lengua indígena	Sin hablantes de lengua indígena	Sin hablantes de lengua indígena	Sin hablantes de lengua indígena	Sin hablantes de lengua indígena	Sin hablantes de lengua indígena	Agricultura	Agricultura	NE	NO	NO	NO	NO	NO	Contaminación ambiental	NA	NA	NA	NA	NA	NA	NA	NA	NA	NA	NA	NA	NA	NA	NA	NA	NA	NA	NA
12	Guerrero	007	Arcelia	0232	Tierra Blanca	1001153	181550	0784	No conexa a carretera	De 4 a 10 km	No hay transporte	No hay transporte	No hay transporte	No hay transporte	Sin hablantes de lengua indígena	Sin hablantes de lengua indígena	Sin hablantes de lengua indígena	Sin hablantes de lengua indígena	Sin hablantes de lengua indígena	Sin hablantes de lengua indígena	Sin hablantes de lengua indígena	Agricultura	NE	NE	NO	NO	NO	NO	NO	Falta de empleo o emigración	NA	NA	NA	NA	NA	NA	NA	NA	NA	NA	NA	NA	NA	NA	NA	NA	NA	NA	NA
12	Guerrero	007	Arcelia	0233	El Trapichal	1000816	180943	1007	No conexa a carretera	De 1 a 3 km	No hay transporte	No hay transporte	No hay transporte	No hay transporte	Sin hablantes de lengua indígena	Sin hablantes de lengua indígena	Sin hablantes de lengua indígena	Sin hablantes de lengua indígena	Sin hablantes de lengua indígena	Sin hablantes de lengua indígena	Sin hablantes de lengua indígena	Agricultura	Agricultura	NE	NO	NO	NO	NO	NO	Falta de energía eléctrica	NA	NA	NA	NA	NA	NA	NA	NA	NA	NA	NA	NA	NA	NA	NA	NA	NA	NA	NA
12	Guerrero	007	Arcelia	0234	Los Tréboles	1001730	181826	0378	NE	Conexión a carretera NE	Disponibilidad de transporte NE	Disponibilidad de transporte NE	Disponibilidad de transporte NE	Disponibilidad de transporte NE	NE	Hablantes de lengua indígena NE	Hablantes de lengua indígena NE	Hablantes de lengua indígena NE	Hablantes de lengua indígena NE	Hablantes de lengua indígena NE	Hablantes de lengua indígena NE	NE	NE	NE	NE	NE	NE	NE	NE	No especificado	NA	NA	NA	NA	NA	NA	NA	NA	NA	NA	NA	NA	NA	NA	NA	NA	NA	NA	NA
12	Guerrero	007	Arcelia	0235	Colonia Guadalupe Victoria (Tierra Blanca)	1000559	180844	1304	Terracería	Conexa a carretera	No hay transporte	No hay transporte	No hay transporte	No hay transporte	Sin hablantes de lengua indígena	Sin hablantes de lengua indígena	Sin hablantes de lengua indígena	Sin hablantes de lengua indígena	Sin hablantes de lengua indígena	Sin hablantes de lengua indígena	Sin hablantes de lengua indígena	Agricultura	NE	NE	NO	NO	NO	NO	NO	Falta de energía eléctrica	NA	NA	NA	NA	NA	NA	NA	NA	NA	NA	NA	NA	NA	NA	NA	NA	NA	NA	NA
12	Guerrero	007	Arcelia	0236	Rancho el Limón	1001818	181745	0380	Pavimentada	Conexa a carretera	Micro, combi o camioneta	DE 15 A 19 MIN	Más de 60 salidas	De 7 a 9 pesos	Sin hablantes de lengua indígena	Sin hablantes de lengua indígena	Sin hablantes de lengua indígena	Sin hablantes de lengua indígena	Sin hablantes de lengua indígena	Sin hablantes de lengua indígena	Sin hablantes de lengua indígena	Agricultura	Servicios de preparación de alimentos y bebidas	Cría y explotación de animales	NO	NO	NO	NO	SI	Falta de infraestructura o servicio de agua	NA	NA	NA	NA	NA	NA	NA	NA	NA	NA	NA	NA	NA	NA	NA	NA	NA	NA	NA
12	Guerrero	007	Arcelia	0237	Fraccionamiento Arcelia I	1001609	181835	0400	Terracería	Conexa a carretera	No hay transporte	No hay transporte	No hay transporte	No hay transporte	Sin hablantes de lengua indígena	Sin hablantes de lengua indígena	Sin hablantes de lengua indígena	Sin hablantes de lengua indígena	Sin hablantes de lengua indígena	Sin hablantes de lengua indígena	Sin hablantes de lengua indígena	Agricultura	NE	NE	NO	NO	NO	NO	NO	Falta de infraestructura o servicio de agua	NA	NA	NA	NA	NA	NA	NA	NA	NA	NA	NA	NA	NA	NA	NA	NA	NA	NA	NA
12	Guerrero	007	Arcelia	0238	Fraccionamiento Lomas Taurinas	1001551	181851	0432	NE	Conexión a carretera NE	Disponibilidad de transporte NE	Disponibilidad de transporte NE	Disponibilidad de transporte NE	Disponibilidad de transporte NE	NE	Hablantes de lengua indígena NE	Hablantes de lengua indígena NE	Hablantes de lengua indígena NE	Hablantes de lengua indígena NE	Hablantes de lengua indígena NE	Hablantes de lengua indígena NE	NE	NE	NE	NE	NE	NE	NE	NE	No especificado	NE	Disponibilidad de red de agua NE	NE	Disponibilidad NE	NE	NE	Recolección y limpieza NE	NE	NE	NE	NE	NE	NE	NE	NE	NE	NE	NE	NE
12	Guerrero	008	Atenango del Río	0001	Atenango del Río	0990627	180622	0637	NDAI	NDAI	Es cabecera	Es cabecera	Es cabecera	Es cabecera	NDAI	NDAI	NDAI	NDAI	NDAI	NDAI	NDAI	NDAI	NDAI	NDAI	NDAI	NDAI	NDAI	NDAI	NDAI	No especificado	NDAI	NDAI	NDAI	NDAI	NDAI	NDAI	NDAI	NDAI	NDAI	NDAI	NDAI	NDAI	NDAI	NDAI	NDAI	NDAI	NDAI	NDAI	NDAI
12	Guerrero	008	Atenango del Río	0002	Apanguito	0990835	180930	0767	Pavimentada	Conexa a carretera	Autobús	De 10 a 14 min	De 21 a 30 salidas al día	De 7 a 9 pesos	Sin hablantes de lengua indígena	Sin hablantes de lengua indígena	Sin hablantes de lengua indígena	Sin hablantes de lengua indígena	Sin hablantes de lengua indígena	Sin hablantes de lengua indígena	Sin hablantes de lengua indígena	Cría y explotación de animales	Agricultura	Insuficientemente especificado del sector comercio al por menor	NO	NO	NO	NO	NO	No especificado	SI	Disponible con cobro	NO	Red de drenaje no disponible	NO	NO	No hay recolección	SI	SI	SI	SI	SI	SI	NO	SI	SI	NO	NO	SI
12	Guerrero	008	Atenango del Río	0003	Atlapa del Río	0990319	181409	0662	Terracería	Conexa a carretera	Autobús	Más de 1.5 y hasta 2 horas	De 1 a 5 salidas al día	De 20 a 24 pesos	Sin hablantes de lengua indígena	Sin hablantes de lengua indígena	Sin hablantes de lengua indígena	Sin hablantes de lengua indígena	Sin hablantes de lengua indígena	Sin hablantes de lengua indígena	Sin hablantes de lengua indígena	Agricultura	NE	NE	NO	NO	NO	NO	NO	Falta de empleo o emigración	NA	NA	NA	NA	NA	NA	NA	NA	NA	NA	NA	NA	NA	NA	NA	NA	NA	NA	NA
12	Guerrero	008	Atenango del Río	0004	La Carbonera	0990008	181411	1055	Terracería	Conexa a carretera	No hay transporte	No hay transporte	No hay transporte	No hay transporte	Sin hablantes de lengua indígena	Sin hablantes de lengua indígena	Sin hablantes de lengua indígena	Sin hablantes de lengua indígena	Sin hablantes de lengua indígena	Sin hablantes de lengua indígena	Sin hablantes de lengua indígena	Agricultura	NE	NE	NO	NO	NO	NO	NO	Falta de infraestructura o servicio de agua	NA	NA	NA	NA	NA	NA	NA	NA	NA	NA	NA	NA	NA	NA	NA	NA	NA	NA	NA
12	Guerrero	008	Atenango del Río	0005	Coacán (Cocán)	0991112	180825	0960	Terracería	Conexa a carretera	No hay transporte	No hay transporte	No hay transporte	No hay transporte	Sin hablantes de lengua indígena	Sin hablantes de lengua indígena	Sin hablantes de lengua indígena	Sin hablantes de lengua indígena	Sin hablantes de lengua indígena	Sin hablantes de lengua indígena	Sin hablantes de lengua indígena	Industria de las bebidas y del tabaco	Agricultura	Cría y explotación de animales	NO	NO	NO	NO	SI	Falta de carretera o transporte	NA	NA	NA	NA	NA	NA	NA	NA	NA	NA	NA	NA	NA	NA	NA	NA	NA	NA	NA
12	Guerrero	008	Atenango del Río	0006	Comala de Gómez	0990408	180919	0658	Terracería	Conexa a carretera	Micro, combi o camioneta	De 30 a 60 min	De 1 a 5 salidas al día	De 10 a 14 pesos	Con hablantes de lengua indígena	Náhuatl	SI	NO	NO	NO	NO	Agricultura	Pesca	Cría y explotación de animales	NO	NO	NO	NO	NO	Falta de carretera o transporte	NO	Red de agua no disponible	NO	Red de drenaje no disponible	NO	NO	No hay recolección	SI	NO	NO	NO	SI	SI	NO	NO	SI	NO	NO	SI
12	Guerrero	008	Atenango del Río	0009	Santa Cruz	0990721	181112	0918	Terracería	Conexa a carretera	No hay transporte	No hay transporte	No hay transporte	No hay transporte	Sin hablantes de lengua indígena	Sin hablantes de lengua indígena	Sin hablantes de lengua indígena	Sin hablantes de lengua indígena	Sin hablantes de lengua indígena	Sin hablantes de lengua indígena	Sin hablantes de lengua indígena	Industria de las bebidas y del tabaco	Agricultura	NE	NO	NO	NO	NO	SI	Falta de empleo o emigración	NA	NA	NA	NA	NA	NA	NA	NA	NA	NA	NA	NA	NA	NA	NA	NA	NA	NA	NA
12	Guerrero	008	Atenango del Río	0010	Temalac	0985708	180702	0952	Pavimentada	Conexa a carretera	Autobús	Más de 1 y hasta 1.5 horas	De 1 a 5 salidas al día	De 20 a 24 pesos	Con hablantes de lengua indígena	Náhuatl	SI	NO	NO	SI	SI	Agricultura	Cría y explotación de animales	Comercio al por menor de abarrotes, alimentos, bebidas, hielo y tabaco	SI	NO	NO	SI	SI	Falta de empleo o emigración	SI	Disponible con cobro	NO	Red de drenaje no disponible	NO	NO	No hay recolección	SI	SI	SI	SI	SI	SI	NO	SI	SI	NO	SI	SI
12	Guerrero	008	Atenango del Río	0012	Tepetlapa	0991036	180321	0883	Terracería	Conexa a carretera	Micro, combi o camioneta	Más de 1 y hasta 1.5 horas	De 1 a 5 salidas al día	De 50 a 59 pesos	Sin hablantes de lengua indígena	Sin hablantes de lengua indígena	Sin hablantes de lengua indígena	Sin hablantes de lengua indígena	Sin hablantes de lengua indígena	Sin hablantes de lengua indígena	Sin hablantes de lengua indígena	Agricultura	Cría y explotación de animales	Insuficientemente especificado del sector comercio al por menor	NO	NO	NO	SI	SI	Falta de empleo o emigración	SI	Disponible con cobro NE	NO	Red de drenaje no disponible	NO	NO	No hay recolección	SI	SI	SI	NO	SI	SI	NO	SI	SI	NO	NO	SI
12	Guerrero	008	Atenango del Río	0013	Tequicuilco	0991151	180613	0737	Pavimentada	Conexa a carretera	Camión de redilas o troca	De 30 a 60 min	Sin salidas diarias	De 25 a 29 pesos	Sin hablantes de lengua indígena	Sin hablantes de lengua indígena	Sin hablantes de lengua indígena	Sin hablantes de lengua indígena	Sin hablantes de lengua indígena	Sin hablantes de lengua indígena	Sin hablantes de lengua indígena	Agricultura	Cría y explotación de animales	NE	SI	NO	NO	NO	SI	Falta de empleo o emigración	SI	Disponible sin cobro	NO	Red de drenaje no disponible	NO	NO	No hay recolección	SI	SI	SI	NO	SI	SI	NO	SI	SI	NO	NO	SI
12	Guerrero	008	Atenango del Río	0014	Tuzantlán	0991058	181213	0941	Pavimentada	Conexa a carretera	Autobús	De 20 a 24 min	De 11 a 20 salidas al día	De 10 a 14 pesos	Sin hablantes de lengua indígena	Sin hablantes de lengua indígena	Sin hablantes de lengua indígena	Sin hablantes de lengua indígena	Sin hablantes de lengua indígena	Sin hablantes de lengua indígena	Sin hablantes de lengua indígena	Agricultura	Cría y explotación de animales	NE	NO	NO	NO	NO	NO	Falta de infraestructura o servicio de agua	SI	Disponible sin cobro	NO	Red de drenaje no disponible	NO	NO	No hay recolección	SI	SI	SI	SI	SI	SI	NO	NO	SI	NO	NO	SI
12	Guerrero	008	Atenango del Río	0015	Santiago Zacango	0990330	181242	0662	Terracería	Conexa a carretera	Autobús	Más de 1 y hasta 1.5 horas	De 1 a 5 salidas al día	De 15 a 19 pesos	Sin hablantes de lengua indígena	Sin hablantes de lengua indígena	Sin hablantes de lengua indígena	Sin hablantes de lengua indígena	Sin hablantes de lengua indígena	Sin hablantes de lengua indígena	Sin hablantes de lengua indígena	Agricultura	Cría y explotación de animales	Pesca	NO	NO	NO	NO	NO	Falta de empleo o emigración	NO	Red de agua no disponible	NO	Red de drenaje no disponible	NO	NO	No hay recolección	SI	SI	SI	NO	SI	SI	NO	NO	SI	NO	NO	SI
12	Guerrero	008	Atenango del Río	0020	Filadelfia	0990255	181453	0678	Terracería	Conexa a carretera	Camión de redilas o troca	Más de 1 y hasta 1.5 horas	Sin salidas diarias	250 pesos y más	Sin hablantes de lengua indígena	Sin hablantes de lengua indígena	Sin hablantes de lengua indígena	Sin hablantes de lengua indígena	Sin hablantes de lengua indígena	Sin hablantes de lengua indígena	Sin hablantes de lengua indígena	Agricultura	Cría y explotación de animales	NE	SI	NO	NO	NO	NO	Falta de apoyo o deficiencia gubernamental	NA	NA	NA	NA	NA	NA	NA	NA	NA	NA	NA	NA	NA	NA	NA	NA	NA	NA	NA
12	Guerrero	008	Atenango del Río	0023	Los Mangos	0990532	180714	0643	Terracería	Conexa a carretera	Autobús	De 25 a 29 min	De 1 a 5 salidas al día	De 10 a 14 pesos	Con hablantes de lengua indígena	Náhuatl	NE	NE	NE	NE	NE	Agricultura	Cría y explotación de animales	NE	NO	NO	NO	NO	NO	Falta de empleo o emigración	NA	NA	NA	NA	NA	NA	NA	NA	NA	NA	NA	NA	NA	NA	NA	NA	NA	NA	NA
12	Guerrero	008	Atenango del Río	0027	Tlachiltepec	0990432	180819	0637	Terracería	Conexa a carretera	No hay transporte	No hay transporte	No hay transporte	No hay transporte	Con hablantes de lengua indígena	Náhuatl	NE	NE	NE	NE	NE	Agricultura	NE	NE	NO	NO	NO	NO	NO	Falta de empleo o emigración	NA	NA	NA	NA	NA	NA	NA	NA	NA	NA	NA	NA	NA	NA	NA	NA	NA	NA	NA
12	Guerrero	008	Atenango del Río	0028	Tlayahualco	0990428	180839	0685	Terracería	Conexa a carretera	No hay transporte	No hay transporte	No hay transporte	No hay transporte	Con hablantes de lengua indígena	Náhuatl	SI	NO	NO	NO	NO	Agricultura	NE	NE	NO	NO	NO	NO	NO	Falta de energía eléctrica	NA	NA	NA	NA	NA	NA	NA	NA	NA	NA	NA	NA	NA	NA	NA	NA	NA	NA	NA
12	Guerrero	008	Atenango del Río	0039	Agua Salada	0990906	182759	0777	Terracería	Conexa a carretera	No hay transporte	No hay transporte	No hay transporte	No hay transporte	Sin hablantes de lengua indígena	Sin hablantes de lengua indígena	Sin hablantes de lengua indígena	Sin hablantes de lengua indígena	Sin hablantes de lengua indígena	Sin hablantes de lengua indígena	Sin hablantes de lengua indígena	Agricultura	NE	NE	NO	NO	NO	NO	NO	Falta de empleo o emigración	NA	NA	NA	NA	NA	NA	NA	NA	NA	NA	NA	NA	NA	NA	NA	NA	NA	NA	NA
12	Guerrero	008	Atenango del Río	0040	Las Joyas	0990832	182826	0758	No conexa a carretera	Distancia NE	Disponibilidad de transporte NE	Disponibilidad de transporte NE	Disponibilidad de transporte NE	Disponibilidad de transporte NE	Sin hablantes de lengua indígena	Sin hablantes de lengua indígena	Sin hablantes de lengua indígena	Sin hablantes de lengua indígena	Sin hablantes de lengua indígena	Sin hablantes de lengua indígena	Sin hablantes de lengua indígena	Agricultura	NE	NE	NO	NO	NO	NO	NO	Falta de empleo o emigración	NA	NA	NA	NA	NA	NA	NA	NA	NA	NA	NA	NA	NA	NA	NA	NA	NA	NA	NA
12	Guerrero	008	Atenango del Río	0041	San Juan Teocalcingo	0990733	182320	1031	Terracería	Conexa a carretera	Autobús	Más de 1.5 y hasta 2 horas	De 1 a 5 salidas al día	De 25 a 29 pesos	Sin hablantes de lengua indígena	Sin hablantes de lengua indígena	Sin hablantes de lengua indígena	Sin hablantes de lengua indígena	Sin hablantes de lengua indígena	Sin hablantes de lengua indígena	Sin hablantes de lengua indígena	Minería de minerales no metálicos	Agricultura	NE	NO	NO	NO	NO	NO	Falta de empleo o emigración	SI	Disponible con cobro	NO	Red de drenaje no disponible	NO	NO	No hay recolección	SI	SI	SI	NO	SI	SI	NO	NO	SI	NO	NO	SI
12	Guerrero	008	Atenango del Río	0049	Tlalalmulco	0990639	180545	0658	Terracería	Conexa a carretera	No hay transporte	No hay transporte	No hay transporte	No hay transporte	Con hablantes de lengua indígena	Náhuatl	SI	NO	NO	NO	NO	Agricultura	NE	NE	NO	NO	NO	NO	NO	Falta de energía eléctrica	NA	NA	NA	NA	NA	NA	NA	NA	NA	NA	NA	NA	NA	NA	NA	NA	NA	NA	NA
12	Guerrero	008	Atenango del Río	0050	El Tecorral	0990649	180704	0654	Pavimentada	Conexa a carretera	Disponibilidad de transporte NE	Disponibilidad de transporte NE	Disponibilidad de transporte NE	Disponibilidad de transporte NE	Sin hablantes de lengua indígena	Sin hablantes de lengua indígena	Sin hablantes de lengua indígena	Sin hablantes de lengua indígena	Sin hablantes de lengua indígena	Sin hablantes de lengua indígena	Sin hablantes de lengua indígena	Agricultura	NE	NE	NO	NO	NO	NO	NO	Falta de infraestructura o servicio de agua	NA	NA	NA	NA	NA	NA	NA	NA	NA	NA	NA	NA	NA	NA	NA	NA	NA	NA	NA
12	Guerrero	008	Atenango del Río	0051	Rancho los Laureles	0990710	180755	0765	Pavimentada	Conexa a carretera	Autobús	DE 15 A 19 MIN	De 11 a 20 salidas al día	De 3 a 6 pesos	Sin hablantes de lengua indígena	Sin hablantes de lengua indígena	Sin hablantes de lengua indígena	Sin hablantes de lengua indígena	Sin hablantes de lengua indígena	Sin hablantes de lengua indígena	Sin hablantes de lengua indígena	Agricultura	Cría y explotación de animales	NE	NO	NO	NO	NO	NO	Falta de infraestructura o servicio de agua	NA	NA	NA	NA	NA	NA	NA	NA	NA	NA	NA	NA	NA	NA	NA	NA	NA	NA	NA
12	Guerrero	009	Atlamajalcingo del Monte	0001	Atlamajalcingo del Monte	0983614	171841	1739	Pavimentada	Conexa a carretera	Es cabecera	Es cabecera	Es cabecera	Es cabecera	Con hablantes de lengua indígena	Mixteco	SI	SI	SI	SI	SI	Agricultura	Cría y explotación de animales	NE	SI	NO	SI	NO	NO	Pobreza o marginación	SI	Disponible con cobro	NO	Red de drenaje no disponible	SI	SI	Queman la basura	SI	NO	NO	SI	SI	SI	SI	SI	SI	SI	NO	SI
12	Guerrero	009	Atlamajalcingo del Monte	0002	Álvaro Obregón	0983517	171420	1981	Terracería	Conexa a carretera	No hay transporte	No hay transporte	No hay transporte	No hay transporte	Con hablantes de lengua indígena	Tlapaneco	SI	NO	NO	SI	SI	Agricultura	NE	NE	NO	NO	NO	NO	NO	Pobreza o marginación	NA	NA	NA	NA	NA	NA	NA	NA	NA	NA	NA	NA	NA	NA	NA	NA	NA	NA	NA
12	Guerrero	009	Atlamajalcingo del Monte	0003	Benito Juárez	0983210	171947	2137	Terracería	Conexa a carretera	Camión de redilas o troca	Más de 1 y hasta 1.5 horas	De 1 a 5 salidas al día	De 35 a 39 pesos	Con hablantes de lengua indígena	Tlapaneco	SI	SI	SI	SI	SI	Agricultura	Cría y explotación de animales	NE	NO	NO	NO	NO	NO	Falta de empleo o emigración	NE	Disponibilidad de red de agua NE	NE	Disponibilidad NE	NE	NE	Recolección y limpieza NE	NE	NE	NE	NE	NE	NE	NE	NE	NE	NE	NE	NE
12	Guerrero	009	Atlamajalcingo del Monte	0004	Cuautipan	0982945	172354	1353	Pavimentada	Conexa a carretera	No hay transporte	No hay transporte	No hay transporte	No hay transporte	Con hablantes de lengua indígena	Mixteco	SI	SI	SI	SI	SI	Agricultura	Cría y explotación de animales	NE	NO	NO	NO	NO	NO	No especificado	SI	Disponible sin cobro	SI	Disponible con desalojo a grieta o barranca	SI	SI	Queman la basura	SI	NO	NO	NO	SI	SI	NO	NO	SI	NO	NO	NO
12	Guerrero	009	Atlamajalcingo del Monte	0005	Chinameca	0983525	171344	1987	Terracería	Conexa a carretera	No hay transporte	No hay transporte	No hay transporte	No hay transporte	Con hablantes de lengua indígena	Mixteco	SI	SI	NO	SI	SI	Agricultura	NE	NE	NO	NO	NO	NO	NO	Falta de empleo o emigración	NA	NA	NA	NA	NA	NA	NA	NA	NA	NA	NA	NA	NA	NA	NA	NA	NA	NA	NA
12	Guerrero	009	Atlamajalcingo del Monte	0006	Huehuetepec	0983529	171604	2329	Terracería	Conexa a carretera	No hay transporte	No hay transporte	No hay transporte	No hay transporte	Con hablantes de lengua indígena	Tlapaneco	SI	SI	SI	SI	SI	Agricultura	NE	NE	NO	NO	NO	NO	NO	Falta de empleo o emigración	SI	Disponible sin cobro	NO	Red de drenaje no disponible	SI	SI	Destino NE	SI	NO	NO	NO	SI	SI	NO	SI	SI	NO	NO	SI
12	Guerrero	009	Atlamajalcingo del Monte	0007	Plan de Guadalupe	0983434	171710	2050	Terracería	Conexa a carretera	Camión de redilas o troca	De 30 a 60 min	De 1 a 5 salidas al día	De 10 a 14 pesos	Con hablantes de lengua indígena	Mixteco	SI	SI	NO	SI	SI	Agricultura	Cría y explotación de animales	NE	NO	NO	NO	NO	SI	Alcoholismo o drogadicción	NE	Disponibilidad de red de agua NE	NE	Disponibilidad NE	NE	NE	Recolección y limpieza NE	NE	NE	NE	NE	NE	NE	NE	NE	NE	NE	NE	NE
12	Guerrero	009	Atlamajalcingo del Monte	0008	El Rosario	0983111	171946	1690	Terracería	Conexa a carretera	No hay transporte	No hay transporte	No hay transporte	No hay transporte	Con hablantes de lengua indígena	Tlapaneco	SI	SI	SI	SI	SI	Agricultura	NE	NE	NO	NO	NO	NO	NO	Sin problema	SI	Disponible sin cobro	NO	Red de drenaje no disponible	SI	SI	Queman la basura	SI	NO	NO	NO	SI	SI	NO	NO	SI	NO	NO	SI
12	Guerrero	009	Atlamajalcingo del Monte	0009	San Isidro Labrador	0983354	171930	1853	Terracería	Conexa a carretera	Camión de redilas o troca	De 30 a 60 min	De 1 a 5 salidas al día	De 20 a 24 pesos	Con hablantes de lengua indígena	Mixteco	SI	SI	SI	SI	SI	Agricultura	Cría y explotación de animales	NE	NO	NO	NO	NO	NO	Falta de empleo o emigración	SI	Disponible sin cobro	NO	Red de drenaje no disponible	SI	SI	Queman la basura	SI	NO	NO	NO	SI	SI	NO	NO	SI	NO	NO	NO
12	Guerrero	009	Atlamajalcingo del Monte	0010	Santa Cruz	0983218	171904	2147	Terracería	Conexa a carretera	Camión de redilas o troca	De 30 a 60 min	De 1 a 5 salidas al día	De 30 a 34 pesos	Con hablantes de lengua indígena	Tlapaneco	SI	SI	SI	SI	SI	Agricultura	Cría y explotación de animales	NE	NO	NO	SI	NO	NO	Pobreza o marginación	SI	Disponible sin cobro	NO	Red de drenaje no disponible	SI	SI	Queman la basura	SI	NO	NO	NO	SI	SI	NO	NO	SI	NO	NO	SI
12	Guerrero	009	Atlamajalcingo del Monte	0011	Tepecocatlán	0983703	171924	2067	Pavimentada	Conexa a carretera	Camión de redilas o troca	DE 15 A 19 MIN	De 1 a 5 salidas al día	De 10 a 14 pesos	Con hablantes de lengua indígena	Mixteco	SI	SI	SI	SI	SI	Agricultura	Cría y explotación de animales	NE	NO	NO	NO	NO	NO	Pobreza o marginación	NO	Red de agua no disponible	NO	Red de drenaje no disponible	SI	SI	Queman la basura	SI	NO	NO	NO	SI	SI	NO	NO	SI	NO	NO	SI
12	Guerrero	009	Atlamajalcingo del Monte	0012	Zilacayotitlán	0983255	171739	2220	Terracería	Conexa a carretera	Camión de redilas o troca	De 30 a 60 min	De 1 a 5 salidas al día	De 20 a 24 pesos	Con hablantes de lengua indígena	Tlapaneco	SI	SI	NO	SI	SI	Agricultura	Insuficientemente especificado del sector comercio al por menor	NE	NO	NO	NO	NO	NO	Pobreza o marginación	SI	Disponible sin cobro	NO	Red de drenaje no disponible	SI	SI	Entierran la basura	SI	SI	SI	SI	SI	SI	SI	SI	SI	NO	NO	SI
12	Guerrero	009	Atlamajalcingo del Monte	0013	Piedra Blanca	0983225	171820	2121	Terracería	Conexa a carretera	Camión de redilas o troca	Más de 1.5 y hasta 2 horas	De 1 a 5 salidas al día	De 30 a 34 pesos	Con hablantes de lengua indígena	Tlapaneco	SI	SI	SI	SI	SI	Agricultura	Cría y explotación de animales	NE	NO	NO	NO	NO	NO	Pobreza o marginación	NA	NA	NA	NA	NA	NA	NA	NA	NA	NA	NA	NA	NA	NA	NA	NA	NA	NA	NA
12	Guerrero	009	Atlamajalcingo del Monte	0022	Cerro Chapulín	0983520	171802	2124	Terracería	Conexa a carretera	Camión de redilas o troca	De 20 a 24 min	De 1 a 5 salidas al día	De 15 a 19 pesos	Con hablantes de lengua indígena	Mixteco	SI	SI	SI	SI	SI	Agricultura	Cría y explotación de animales	NE	NO	NO	NO	NO	NO	Falta de empleo o emigración	NA	NA	NA	NA	NA	NA	NA	NA	NA	NA	NA	NA	NA	NA	NA	NA	NA	NA	NA
12	Guerrero	009	Atlamajalcingo del Monte	0023	Colonia Santa Rosa	0983549	171816	1961	Terracería	Conexa a carretera	Camión de redilas o troca	De 10 a 14 min	De 1 a 5 salidas al día	De 10 a 14 pesos	Con hablantes de lengua indígena	Mixteco	SI	SI	SI	SI	SI	Agricultura	Cría y explotación de animales	NE	NO	NO	NO	NO	NO	Pobreza o marginación	NA	NA	NA	NA	NA	NA	NA	NA	NA	NA	NA	NA	NA	NA	NA	NA	NA	NA	NA
12	Guerrero	009	Atlamajalcingo del Monte	0024	Colonia Vicente Guerrero	0983543	171843	1943	Terracería	Conexa a carretera	Camión de redilas o troca	De 3 a 9 min	De 1 a 5 salidas al día	De 3 a 6 pesos	Con hablantes de lengua indígena	Mixteco	SI	SI	SI	SI	SI	Agricultura	Cría y explotación de animales	NE	SI	NO	SI	NO	NO	Pobreza o marginación	NA	NA	NA	NA	NA	NA	NA	NA	NA	NA	NA	NA	NA	NA	NA	NA	NA	NA	NA
12	Guerrero	009	Atlamajalcingo del Monte	0025	Mi Patria es Primero	0983354	171907	1913	Terracería	Conexa a carretera	Camión de redilas o troca	De 30 a 60 min	De 1 a 5 salidas al día	De 20 a 24 pesos	Con hablantes de lengua indígena	Mixteco	SI	SI	SI	SI	SI	Agricultura	Cría y explotación de animales	NE	NO	NO	NO	NO	NO	Falta de empleo o emigración	NA	NA	NA	NA	NA	NA	NA	NA	NA	NA	NA	NA	NA	NA	NA	NA	NA	NA	NA
12	Guerrero	009	Atlamajalcingo del Monte	0026	Juquila	0983509	171540	2207	Terracería	Conexa a carretera	No hay transporte	No hay transporte	No hay transporte	No hay transporte	Con hablantes de lengua indígena	Tlapaneco	SI	SI	NO	SI	SI	Agricultura	NE	NE	NO	NO	NO	NO	NO	Pobreza o marginación	NA	NA	NA	NA	NA	NA	NA	NA	NA	NA	NA	NA	NA	NA	NA	NA	NA	NA	NA
12	Guerrero	010	Atlixtac	0001	Atlixtac	0985613	173350	1672	Pavimentada	Conexa a carretera	Es cabecera	Es cabecera	Es cabecera	Es cabecera	Con hablantes de lengua indígena	Náhuatl	NO	SI	NO	NO	NO	Insuficientemente especificado del sector industria manufacturera	NE	NE	NO	NO	NO	NO	NO	Falta de infraestructura o servicio de agua	SI	Disponible con cobro	SI	Disponible con desalojo a planta de tratamiento	NO	NO	No hay recolección	SI	NO	SI	SI	SI	SI	SI	NO	NO	SI	NO	SI
12	Guerrero	010	Atlixtac	0002	Acatempa	0985021	172741	2182	No conexa a carretera	De 41 a 50 km	No hay transporte	No hay transporte	No hay transporte	No hay transporte	Con hablantes de lengua indígena	Náhuatl	SI	SI	SI	SI	SI	Agricultura	NE	NE	SI	NO	NO	NO	NO	Irregularidad o disputa relacionada con la tenencia de la tierra	NA	NA	NA	NA	NA	NA	NA	NA	NA	NA	NA	NA	NA	NA	NA	NA	NA	NA	NA
12	Guerrero	010	Atlixtac	0003	Ahuexotitlán	0985221	172624	2339	Terracería	Conexa a carretera	No hay transporte	No hay transporte	No hay transporte	No hay transporte	Con hablantes de lengua indígena	Náhuatl	SI	SI	SI	SI	SI	Agricultura	Trabajos de albañilería de instalaciones hidrosanitarias y eléctricas y de trabajos en exteriores	NE	NO	NO	NO	NO	NO	Delincuencia o inseguridad	NE	Disponibilidad de red de agua NE	NE	Disponibilidad NE	NE	NE	Recolección y limpieza NE	NE	NE	NE	NE	NE	NE	NE	NE	NE	NE	NE	NE
12	Guerrero	010	Atlixtac	0004	Ahuixtla	0985751	173544	1443	Terracería	Conexa a carretera	Micro, combi o camioneta	DE 15 A 19 MIN	De 1 a 5 salidas al día	De 15 a 19 pesos	Sin hablantes de lengua indígena	Sin hablantes de lengua indígena	Sin hablantes de lengua indígena	Sin hablantes de lengua indígena	Sin hablantes de lengua indígena	Sin hablantes de lengua indígena	Sin hablantes de lengua indígena	Agricultura	NE	NE	SI	SI	NO	NO	SI	Falta de otros servicios o equipamiento	NE	Disponibilidad de red de agua NE	NE	Disponibilidad NE	NE	NE	Recolección y limpieza NE	NE	NE	NE	NE	NE	NE	NE	NE	NE	NE	NE	NE
12	Guerrero	010	Atlixtac	0005	Alpoyeca (Alpuyeca)	0985509	173114	1920	Terracería	Conexa a carretera	Micro, combi o camioneta	De 30 a 60 min	De 1 a 5 salidas al día	De 30 a 34 pesos	Sin hablantes de lengua indígena	Sin hablantes de lengua indígena	Sin hablantes de lengua indígena	Sin hablantes de lengua indígena	Sin hablantes de lengua indígena	Sin hablantes de lengua indígena	Sin hablantes de lengua indígena	Agricultura	Agricultura	NE	NO	NO	NO	NO	NO	No especificado	NA	NA	NA	NA	NA	NA	NA	NA	NA	NA	NA	NA	NA	NA	NA	NA	NA	NA	NA
12	Guerrero	010	Atlixtac	0006	Analco Grande	0985422	173310	1889	Pavimentada	Conexa a carretera	Micro, combi o camioneta	DE 15 A 19 MIN	De 6 a 10 salidas al día	De 15 a 19 pesos	Sin hablantes de lengua indígena	Sin hablantes de lengua indígena	Sin hablantes de lengua indígena	Sin hablantes de lengua indígena	Sin hablantes de lengua indígena	Sin hablantes de lengua indígena	Sin hablantes de lengua indígena	Agricultura	NE	NE	NO	NO	NO	NO	NO	Falta de empleo o emigración	NA	NA	NA	NA	NA	NA	NA	NA	NA	NA	NA	NA	NA	NA	NA	NA	NA	NA	NA
12	Guerrero	010	Atlixtac	0007	Atempa	0985553	173437	1457	No conexa a carretera	De 1 a 3 km	No hay transporte	No hay transporte	No hay transporte	No hay transporte	Con hablantes de lengua indígena	Náhuatl	SI	NO	NO	NO	NO	Agricultura	NE	NE	NO	NO	NO	NO	NO	Falta de carretera o transporte	NA	NA	NA	NA	NA	NA	NA	NA	NA	NA	NA	NA	NA	NA	NA	NA	NA	NA	NA
12	Guerrero	010	Atlixtac	0008	Cacalotepec	0985310	172307	1823	Terracería	Conexa a carretera	Micro, combi o camioneta	Más de 3 y hasta 4 horas	De 1 a 5 salidas al día	De 75 a 99 pesos	Con hablantes de lengua indígena	Tlapaneco	SI	SI	SI	SI	SI	Agricultura	NE	NE	SI	NO	SI	NO	NO	Sin problema	SI	Disponible sin cobro	NO	Red de drenaje no disponible	SI	SI	Destino NE	SI	NO	NO	SI	SI	SI	NO	NO	SI	NO	NO	NO
12	Guerrero	010	Atlixtac	0009	Caxitepec	0985803	171740	1804	Terracería	Conexa a carretera	No hay transporte	No hay transporte	No hay transporte	No hay transporte	Con hablantes de lengua indígena	Tlapaneco	SI	SI	SI	SI	SI	Agricultura	NE	NE	NO	NO	NO	NO	NO	Pobreza o marginación	SI	Disponible sin cobro	SI	Disponible con desalojo a planta de tratamiento	NO	NO	No hay recolección	SI	NO	NO	NO	NO	SI	NO	NO	SI	NO	NO	SI
12	Guerrero	010	Atlixtac	0010	Coatlamoloya (Cuatlamoloya)	0985501	173647	1398	No conexa a carretera	De 41 a 50 km	No hay transporte	No hay transporte	No hay transporte	No hay transporte	Sin hablantes de lengua indígena	Sin hablantes de lengua indígena	Sin hablantes de lengua indígena	Sin hablantes de lengua indígena	Sin hablantes de lengua indígena	Sin hablantes de lengua indígena	Sin hablantes de lengua indígena	Agricultura	NE	NE	SI	SI	NO	NO	SI	Falta de carretera o transporte	NA	NA	NA	NA	NA	NA	NA	NA	NA	NA	NA	NA	NA	NA	NA	NA	NA	NA	NA
12	Guerrero	010	Atlixtac	0011	Coxilitepec	0985120	172602	2301	Terracería	Conexa a carretera	No hay transporte	No hay transporte	No hay transporte	No hay transporte	Con hablantes de lengua indígena	Náhuatl	SI	SI	NO	SI	SI	Agricultura	Trabajos de albañilería de instalaciones hidrosanitarias y eléctricas y de trabajos en exteriores	NE	NO	NO	SI	SI	SI	Alcoholismo o drogadicción	NE	Disponibilidad de red de agua NE	NE	Disponibilidad NE	NE	NE	Recolección y limpieza NE	NE	NE	NE	NE	NE	NE	NE	NE	NE	NE	NE	NE
12	Guerrero	010	Atlixtac	0012	San Juan Bautista Coapala	0985022	172629	2076	Terracería	Conexa a carretera	Micro, combi o camioneta	Más de 2 y hasta 3 horas	De 1 a 5 salidas al día	De 100 a 119 pesos	Con hablantes de lengua indígena	Náhuatl	SI	SI	SI	SI	SI	Agricultura	NE	NE	SI	SI	SI	SI	SI	Falta de drenaje y alcantarillado	SI	Disponible con cobro	SI	Disponible con desalojo a grieta o barranca	NO	NO	No hay recolección	SI	NO	NO	NO	SI	SI	SI	NO	SI	NO	NO	SI
12	Guerrero	010	Atlixtac	0013	Cuapexco	0985521	173253	1690	Pavimentada	Conexa a carretera	Autobús	De 10 a 14 min	De 1 a 5 salidas al día	De 10 a 14 pesos	Con hablantes de lengua indígena	Náhuatl	SI	NO	NO	NO	NO	Agricultura	NE	NE	NO	NO	NO	NO	NO	Falta de otros servicios o equipamiento	NA	NA	NA	NA	NA	NA	NA	NA	NA	NA	NA	NA	NA	NA	NA	NA	NA	NA	NA
12	Guerrero	010	Atlixtac	0014	Chimixtla (Chilmixtla)	0985412	173243	1763	Pavimentada	Conexa a carretera	Micro, combi o camioneta	De 20 a 24 min	De 6 a 10 salidas al día	De 10 a 14 pesos	Sin hablantes de lengua indígena	Sin hablantes de lengua indígena	Sin hablantes de lengua indígena	Sin hablantes de lengua indígena	Sin hablantes de lengua indígena	Sin hablantes de lengua indígena	Sin hablantes de lengua indígena	Agricultura	Trabajos de albañilería de instalaciones hidrosanitarias y eléctricas y de trabajos en exteriores	Industria de la madera	NO	NO	NO	NO	NO	Falta de empleo o emigración	NE	Disponibilidad de red de agua NE	NE	Disponibilidad NE	NE	NE	Recolección y limpieza NE	NE	NE	NE	NE	NE	NE	NE	NE	NE	NE	NE	NE
12	Guerrero	010	Atlixtac	0016	El Duraznal	0985317	173002	2157	Terracería	Conexa a carretera	No hay transporte	No hay transporte	No hay transporte	No hay transporte	Sin hablantes de lengua indígena	Sin hablantes de lengua indígena	Sin hablantes de lengua indígena	Sin hablantes de lengua indígena	Sin hablantes de lengua indígena	Sin hablantes de lengua indígena	Sin hablantes de lengua indígena	Agricultura	Agricultura	NE	NO	NO	NO	NO	SI	Falta de equipamiento o servicios de salud	SI	Disponible sin cobro	SI	Disponible con desalojo a otro lugar	NO	NO	No hay recolección	SI	NO	NO	NO	SI	SI	NO	NO	SI	NO	NO	SI
12	Guerrero	010	Atlixtac	0018	Huixolotepec (Huitzolotepec)	0985428	172206	1753	Terracería	Conexa a carretera	No hay transporte	No hay transporte	No hay transporte	No hay transporte	Con hablantes de lengua indígena	Tlapaneco	SI	SI	SI	SI	SI	Agricultura	NE	NE	NO	NO	NO	NO	NO	Pobreza o marginación	SI	Disponible sin cobro	SI	Disponible con desalojo a planta de tratamiento	SI	NO	Destino NE	SI	NO	NO	NO	NO	SI	NO	NO	SI	NO	NO	SI
12	Guerrero	010	Atlixtac	0019	Huitzacotla	0985420	173334	1882	Terracería	Conexa a carretera	Micro, combi o camioneta	DE 15 A 19 MIN	De 6 a 10 salidas al día	De 15 a 19 pesos	Con hablantes de lengua indígena	Náhuatl	SI	NO	NO	NO	NO	Agricultura	Trabajos de albañilería de instalaciones hidrosanitarias y eléctricas y de trabajos en exteriores	NE	SI	SI	SI	NO	SI	Falta de energía eléctrica	SI	Disponible sin cobro	SI	Disponible con desalojo a otro lugar	NO	NO	No hay recolección	SI	NO	NO	NO	SI	SI	NO	NO	SI	NO	NO	NO
12	Guerrero	010	Atlixtac	0020	Ixmatla	0985808	173304	1740	Terracería	Conexa a carretera	No hay transporte	No hay transporte	No hay transporte	No hay transporte	Con hablantes de lengua indígena	Náhuatl	SI	NO	NO	NO	NO	Agricultura	NE	NE	SI	NO	NO	NO	NO	Falta de carretera o transporte	NA	NA	NA	NA	NA	NA	NA	NA	NA	NA	NA	NA	NA	NA	NA	NA	NA	NA	NA
12	Guerrero	010	Atlixtac	0021	Ixtlahua Roja (Ixtlahua)	0985625	172127	1946	Terracería	Conexa a carretera	No hay transporte	No hay transporte	No hay transporte	No hay transporte	Con hablantes de lengua indígena	Tlapaneco	SI	SI	SI	SI	SI	Agricultura	Trabajan en otra localidad	NE	SI	NO	NO	NO	NO	Falta de equipamiento o servicios para la educación	NO	Red de agua no disponible	NO	Red de drenaje no disponible	NO	NO	No hay recolección	SI	NO	NO	NO	NO	SI	NO	NO	SI	NO	NO	NO
12	Guerrero	010	Atlixtac	0024	Los Mesones	0985233	173300	1891	Pavimentada	Conexa a carretera	Micro, combi o camioneta	De 20 a 24 min	De 11 a 20 salidas al día	De 15 a 19 pesos	Sin hablantes de lengua indígena	Sin hablantes de lengua indígena	Sin hablantes de lengua indígena	Sin hablantes de lengua indígena	Sin hablantes de lengua indígena	Sin hablantes de lengua indígena	Sin hablantes de lengua indígena	Agricultura	Agricultura	NE	NO	NO	NO	NO	NO	Falta de empleo o emigración	SI	Disponible sin cobro	SI	Disponible con desalojo a grieta o barranca	NO	NO	No hay recolección	SI	SI	NO	NO	NO	SI	NO	NO	SI	NO	NO	SI
12	Guerrero	010	Atlixtac	0026	Naranjastitlán	0985400	173539	1429	No conexa a carretera	De 1 a 3 km	No hay transporte	No hay transporte	No hay transporte	No hay transporte	Sin hablantes de lengua indígena	Sin hablantes de lengua indígena	Sin hablantes de lengua indígena	Sin hablantes de lengua indígena	Sin hablantes de lengua indígena	Sin hablantes de lengua indígena	Sin hablantes de lengua indígena	Agricultura	NE	NE	NO	NO	NO	NO	NO	Falta de carretera o transporte	NA	NA	NA	NA	NA	NA	NA	NA	NA	NA	NA	NA	NA	NA	NA	NA	NA	NA	NA
12	Guerrero	010	Atlixtac	0027	Ocopexco	0985121	172519	2222	Pavimentada	Conexa a carretera	Micro, combi o camioneta	Más de 1 y hasta 1.5 horas	De 6 a 10 salidas al día	De 50 a 59 pesos	Con hablantes de lengua indígena	Tlapaneco	SI	SI	SI	SI	SI	Agricultura	Agricultura	NE	SI	SI	NO	SI	SI	Sin problema	SI	Disponible con cobro	NO	Red de drenaje no disponible	SI	SI	Entierran la basura	SI	NO	SI	NO	SI	SI	NO	NO	SI	NO	NO	SI
12	Guerrero	010	Atlixtac	0028	Petatlán	0985917	173449	1382	Pavimentada	Conexa a carretera	Taxi	DE 15 A 19 MIN	De 6 a 10 salidas al día	De 10 a 14 pesos	Sin hablantes de lengua indígena	Sin hablantes de lengua indígena	Sin hablantes de lengua indígena	Sin hablantes de lengua indígena	Sin hablantes de lengua indígena	Sin hablantes de lengua indígena	Sin hablantes de lengua indígena	Agricultura	NE	NE	NO	NO	NO	NO	NO	Sin problema	SI	Disponible sin cobro	NO	Red de drenaje no disponible	SI	NO	Destino NE	SI	SI	NO	SI	SI	SI	SI	NO	SI	NO	NO	SI
12	Guerrero	010	Atlixtac	0029	El Potrero	0985517	173525	1538	Terracería	Conexa a carretera	Micro, combi o camioneta	De 30 a 60 min	De 1 a 5 salidas al día	De 20 a 24 pesos	Sin hablantes de lengua indígena	Sin hablantes de lengua indígena	Sin hablantes de lengua indígena	Sin hablantes de lengua indígena	Sin hablantes de lengua indígena	Sin hablantes de lengua indígena	Sin hablantes de lengua indígena	Agricultura	NE	NE	SI	NO	NO	NO	SI	Falta de carretera o transporte	NA	NA	NA	NA	NA	NA	NA	NA	NA	NA	NA	NA	NA	NA	NA	NA	NA	NA	NA
12	Guerrero	010	Atlixtac	0030	Rancho Viejo	0985714	173348	1791	Terracería	Conexa a carretera	No hay transporte	No hay transporte	No hay transporte	No hay transporte	Con hablantes de lengua indígena	Náhuatl	SI	SI	NO	NO	NO	Agricultura	NE	NE	NO	NO	NO	NO	NO	Falta de empleo o emigración	NA	NA	NA	NA	NA	NA	NA	NA	NA	NA	NA	NA	NA	NA	NA	NA	NA	NA	NA
12	Guerrero	010	Atlixtac	0031	San Miguel Xochimilco	0984828	173658	1569	Terracería	Conexa a carretera	No hay transporte	No hay transporte	No hay transporte	No hay transporte	Sin hablantes de lengua indígena	Sin hablantes de lengua indígena	Sin hablantes de lengua indígena	Sin hablantes de lengua indígena	Sin hablantes de lengua indígena	Sin hablantes de lengua indígena	Sin hablantes de lengua indígena	Agricultura	NE	NE	NO	NO	NO	NO	NO	Falta de infraestructura o servicio de agua	NA	NA	NA	NA	NA	NA	NA	NA	NA	NA	NA	NA	NA	NA	NA	NA	NA	NA	NA
12	Guerrero	010	Atlixtac	0032	La Taberna	0985528	172228	1619	Terracería	Conexa a carretera	No hay transporte	No hay transporte	No hay transporte	No hay transporte	Con hablantes de lengua indígena	Tlapaneco	SI	SI	SI	SI	SI	Agricultura	NE	NE	NO	NO	NO	NO	NO	Falta de carretera o transporte	NE	Disponibilidad de red de agua NE	NE	Disponibilidad NE	NE	NE	Recolección y limpieza NE	NE	NE	NE	NE	NE	NE	NE	NE	NE	NE	NE	NE
12	Guerrero	010	Atlixtac	0033	Tecocomulapa	0985437	173441	1739	Terracería	Conexa a carretera	Micro, combi o camioneta	De 20 a 24 min	De 1 a 5 salidas al día	De 15 a 19 pesos	Sin hablantes de lengua indígena	Sin hablantes de lengua indígena	Sin hablantes de lengua indígena	Sin hablantes de lengua indígena	Sin hablantes de lengua indígena	Sin hablantes de lengua indígena	Sin hablantes de lengua indígena	Agricultura	NE	NE	SI	SI	SI	NO	NO	Falta de equipamiento o servicios de salud	NE	Disponibilidad de red de agua NE	NE	Disponibilidad NE	NE	NE	Recolección y limpieza NE	NE	NE	NE	NE	NE	NE	NE	NE	NE	NE	NE	NE
12	Guerrero	010	Atlixtac	0034	San Lucas Teocuitlapa (Teocuitlapa)	0985506	172026	1293	Terracería	Conexa a carretera	Micro, combi o camioneta	Más de 2 y hasta 3 horas	De 1 a 5 salidas al día	De 60 a 74 pesos	Con hablantes de lengua indígena	Tlapaneco	SI	SI	SI	SI	SI	Agricultura	NE	NE	NO	NO	NO	NO	NO	Pobreza o marginación	SI	Disponible con cobro	NO	Red de drenaje no disponible	NO	NO	No hay recolección	SI	NO	NO	NO	SI	SI	SI	NO	SI	NO	NO	SI
12	Guerrero	010	Atlixtac	0036	Texocotitlán	0985448	173202	1946	Terracería	Conexa a carretera	Micro, combi o camioneta	De 25 a 29 min	De 1 a 5 salidas al día	De 20 a 24 pesos	Sin hablantes de lengua indígena	Sin hablantes de lengua indígena	Sin hablantes de lengua indígena	Sin hablantes de lengua indígena	Sin hablantes de lengua indígena	Sin hablantes de lengua indígena	Sin hablantes de lengua indígena	Agricultura	Agricultura	NE	NO	NO	NO	NO	NO	Falta de drenaje y alcantarillado	NA	NA	NA	NA	NA	NA	NA	NA	NA	NA	NA	NA	NA	NA	NA	NA	NA	NA	NA
12	Guerrero	010	Atlixtac	0037	Tlacoxochapa	0985313	172148	1621	Terracería	Conexa a carretera	No hay transporte	No hay transporte	No hay transporte	No hay transporte	Con hablantes de lengua indígena	Tlapaneco	SI	SI	SI	SI	SI	Agricultura	NE	NE	NO	NO	NO	NO	NO	Pobreza o marginación	SI	Disponible sin cobro	NO	Red de drenaje no disponible	NO	NO	No hay recolección	SI	NO	NO	NO	SI	SI	NO	NO	SI	NO	NO	SI
12	Guerrero	010	Atlixtac	0038	Chichiltepec	0985611	172012	1497	Terracería	Conexa a carretera	Micro, combi o camioneta	Más de 3 y hasta 4 horas	Frecuencia NE	De 75 a 99 pesos	Con hablantes de lengua indígena	Tlapaneco	SI	SI	SI	SI	SI	Agricultura	NE	NE	NO	NO	NO	NO	NO	Pobreza o marginación	SI	Disponible con cobro	NO	Red de drenaje no disponible	NO	NO	No hay recolección	SI	NO	NO	NO	SI	SI	NO	NO	SI	NO	NO	SI
12	Guerrero	010	Atlixtac	0039	Tlatlauquitepec	0984930	173251	2068	Pavimentada	Conexa a carretera	Taxi	De 30 a 60 min	De 11 a 20 salidas al día	De 20 a 24 pesos	Con hablantes de lengua indígena	Náhuatl	SI	SI	SI	SI	NO	Agricultura	Insuficientemente especificado del sector transportes	Trabajos de albañilería de instalaciones hidrosanitarias y eléctricas y de trabajos en exteriores	NO	NO	NO	NO	SI	Falta de infraestructura o servicio de agua	SI	Disponible sin cobro	SI	Disponible con desalojo a otro lugar	NO	NO	No hay recolección	SI	NO	NO	NO	NO	NO	SI	NO	SI	NO	NO	SI
12	Guerrero	010	Atlixtac	0040	Tlacotepec	0985122	172654	2308	Terracería	Conexa a carretera	Micro, combi o camioneta	Más de 1 y hasta 1.5 horas	De 1 a 5 salidas al día	De 40 a 49 pesos	Con hablantes de lengua indígena	Náhuatl	SI	SI	SI	SI	SI	Agricultura	NE	NE	NO	NO	NO	NO	NO	Falta de empleo o emigración	NA	NA	NA	NA	NA	NA	NA	NA	NA	NA	NA	NA	NA	NA	NA	NA	NA	NA	NA
12	Guerrero	010	Atlixtac	0041	Tonalapa	0985705	171847	1520	Terracería	Conexa a carretera	Micro, combi o camioneta	Más de 4 horas	Frecuencia NE	De 150 a 199 pesos	Con hablantes de lengua indígena	Tlapaneco	SI	SI	SI	SI	SI	Agricultura	NE	NE	NO	NO	NO	NO	NO	Pobreza o marginación	SI	Disponible con cobro	NO	Red de drenaje no disponible	NO	NO	No hay recolección	SI	NO	NO	NO	SI	SI	NO	NO	SI	NO	NO	NO
12	Guerrero	010	Atlixtac	0042	Xalpitzáhuac	0985238	172532	2347	Pavimentada	Conexa a carretera	Micro, combi o camioneta	De 30 a 60 min	De 11 a 20 salidas al día	De 40 a 49 pesos	Con hablantes de lengua indígena	Náhuatl	SI	SI	SI	SI	SI	Agricultura	NE	NE	SI	NO	SI	SI	SI	Irregularidad o disputa relacionada con la tenencia de la tierra	NO	Red de agua no disponible	NO	Red de drenaje no disponible	NO	NO	No hay recolección	SI	NO	SI	NO	SI	SI	NO	NO	SI	NO	NO	SI
[truncated: 6,487 more rows]
[truncated: 173 more columns]

## Sheet: Variables description
Censo de Población y Vivienda 2010
Infraestructura y Características Socioeconómicas de las Localidades con menos de 5 mil habitantes
[truncated: 271 more rows]
