# Supplementary material for: Technology Roadmapping Architecture Based on Knowledge Management: Case Study for Improved Indigenous Coffee Production from Guerrero, Mexico
Source: Hindawi journal article supplement (doi:10.1155/2019/5860905), 2019-05-09
Supplement: f1 [file 5860905.f1.zip › Micro level and roadmapping structure.xlsx]

## Sheet: Hoja1
Paraje Montero and Tierra Colorada, Guerrero, Mexico.
Age	Gender	Memebers in your family	Time producing coffee (in years)	Additional crops	Cultivated area (in Ha)	Amount of your last production (in Kilograms)	Sale price (in mexican pesos)	Desired future	Current situation	Route
47	F	6	35	Banana, avocado	2.5	400	17	Effective actions against pest and disease	Presense of pest and diseases	Greenhouse
69	F	2	45	No	3	600	18	Renovated plants	Old plantations	Greenhouse
54	F	3	5	No	2	600	24	Monitoring coffee crops	Climate changes	Greenhouse
47	M	6	25	No	1.5	500	18	Access to infrastructure	Lack of infrastructure	Greenhouse
40	F	5	17	Banana, pineapple	2	580	22	Training	Less production	Network with experts
47	M	5	16	Banana, corn	4	1600	21	Access to infrastructure	Lack of commercialization channels	Technology networks
26	F	5	7	Banana, corn	2.5	800	21	Credits	Less production	Greenhouse
45	F	5	17	Corn, cocoa	3.5	1800	21	Better nutrition in plant	Less production	Greenhouse
26	M	5	8	Banana	2.5	750	21	Access to credits	Low sale cost	Infrastructure (greenhouse)
32	M	4	6	Banana	3	900	21	Effective actions against pest and disease	Presense of pest and diseases	Greenhouse
31	F	4	6	Corn	2.5	700	21	Access to credits	Lack of infrastructure	Infrastructure (greenhouse)
41	M	2	10	Corn	2	500	21	Effective actions against pest and disease	Presense of pest and diseases	Greenhouse
31	F	7	12	Banana	2	400	22	Effective actions against pest and disease	Presense of pest and diseases	Greenhouse
61	F	3	35	No	2	1000	20	Training in cultivation and pruning practices	Climate changes	Greenhouse, knowledge network
72	M	3	35	Banana	2	800	22	Better nutrition in plant	Old plantations	Greenhouse
41	F	4	8	Banana	1	219	21	Effective actions against pest and disease	Presense of pest and diseases	Greenhouse
42	F	5	23	Banana	3	700	20	Effective actions against pest and disease	Presense of pest and diseases	Greenhouse
51	F	1	30	Banana	1	400	20	Effective actions against pest and disease	Presense of pest and diseases	Greenhouse
28	M	3	3	Banana	1	360	24	Effective actions against pest and disease	Presense of pest and diseases	Greenhouse
20	F	2	3	No	0.5	0	0	Credits	Lack of commercialization channels	Technology networks
24	M	4	3	Corn	2.5	500	24	Monitoring coffee crops	Climate changes	Greenhouse
32	M	4	10	Banana	2.5	400	25	Renovated plants	Old plantations	Greenhouse
23	F	4	3	Banana	2	500	24	Access to infrastructure	Lack of commercialization channels	Technology networks
67	M	3	35	No	2.5	600	24	Training in cultivation and pruning practices	Old plantations	Network with experts
65	M	4	28	Banana	2	365	22.5	Better nutrition in plant	Old plantations	Network with experts, greenhouse
56	F	4	22	No	1	100	22.5	Renovated plants	Less production	Network with experts, greenhouse
43	M	6	15	Banana	2	800	22.5	Renovated plants	Less production, low sale cost	Network with experts, greenhouse
38	F	6	10	No	1.5	850	22.5	Renovated plants	Less production, low sale cost	Network with experts, greenhouse
57	F	8	20	Banana	3	1200	24	Monitoring coffee crops	Presense of pest and diseases	Greenhouse
28	F	3	3	Banana	1	200	24	Monitoring coffee crops	Climate changes	Greenhouse
27	M	1	4	Banana	1.5	150	24	Monitoring coffee crops	Climate changes	Greenhouse
67	M	3	30	Corn	1	200	24	Monitoring coffee crops	Climate changes	Greenhouse
75	M	2	35	Corn	2	500	20	Effective actions against pest and disease	Presense of pest and diseases	Greenhouse
70	F	2	35	Corn	2	500	18	Effective actions against pest and disease	Presense of pest and diseases	Greenhouse
24	F	5	6	Banana	2	400	24	Effective actions against pest and disease	Presense of pest and diseases	Greenhouse
57	F	4	20	Banana	2.5	1200	20	Training in cultivation and pruning practices	Lack of commercialization channels	Technology networks
85	F	2	25	Banana	2	600	20	Effective actions against pest and disease	Presense of pest and diseases	Greenhouse
28	F	3	8	No	1	0	0	Effective actions against pest and disease	Presense of pest and diseases	Greenhouse
28	M	5	6	Banana	2	200	18	Effective actions against pest and disease	Presense of pest and diseases	Greenhouse
61	M	5	37	Banana	3.5	1500	21	Monitoring coffee crops	Climate changes	Technology and management networks
54	F	5	35	Banana	2.5	1000	21	Monitoring coffee crops	Climate changes	Technology and management networks
70	M	2	25	Banana	2.5	300	18	Effective actions against pest and disease	Presense of pest and diseases	Greenhouse
57	F	3	25	Banana	2	200	18	Effective actions against pest and disease	Presense of pest and diseases	Greenhouse
45	M	5	20	Banana	3	1000	19	Access to infrastructure	Lack of infrastructure	Technology and management networks
42	F	5	19	Banana	3	900	19	Access to infrastructure	Lack of infrastructure	Technology and management networks
59	F	3	30	Banana	3	700	20	Credits	Less production	Networks with financial institutions and experts.
52	F	9	20	Orange	3	800	22	Access to infrastructure	Lack of infrastructure	Technology and management networks
40	M	5	20	Banana	2.5	600	18	Access to infrastructure	Lack of infrastructure	Technology and management networks
39	F	5	7	Banana	2	0	0	Effective actions against pest and disease	Presense of pest and diseases	Greenhouse
44	F	1	28	Banana	10	2000	24	Training in cultivation and pruning practices	Low sale cost	Technology and management networks
77	M	2	60	Banana	4	800	24	Access to infrastructure	Lack of infrastructure	Technology and management networks
69	F	2	50	Banana	4	1500	24	Access to infrastructure	Low sale cost	Technology and management networks
44	F	8	23	Banana	2.5	50	20	Effective actions against pest and disease	Presense of pest and diseases	Greenhouse
76	M	2	30	No	1.5	30	24	Effective actions against pest and disease	Presense of pest and diseases	Greenhouse
46	M	3	20	Banana	1.5	1800	23	Access to infrastructure	Low sale cost	Technology and management networks
23	F	1	7	Banana	1	735	23	Credits	Less production	Technology and management networks
65	M	1	5	No	2	0	0	Effective actions against pest and disease	Presense of pest and diseases	Greenhouse
40	M	2	20	Banana	2.5	1500	17	Access to infrastructure	Low sale cost	Technology and management networks
67	M	1	22	Banana	3.5	800	23	Monitoring coffee crops	Climate changes	Greenhouse
24	M	5	8	Banana	1.5	600	21	Effective actions against pest and disease	Presense of pest and diseases	Greenhouse
61	M	3	30	Banana	2	200	21	Effective actions against pest and disease	Presense of pest and diseases	Greenhouse
50	F	3	20	Banana	1.5	300	23	Effective actions against pest and disease	Presense of pest and diseases	Greenhouse
78	F	2	35	Banana	0.75	250	21	Effective actions against pest and disease	Presense of pest and diseases	Greenhouse
38	M	6	10	Banana	1	300	19	Effective actions against pest and disease	Presense of pest and diseases	Greenhouse
80	M	1	20	Banana	1.5	1300	19	Access to infrastructure	Lack of commercialization channels	Technology and management networks
65	M	5	20	Banana	2	200	19.5	Effective actions against pest and disease	Presense of pest and diseases	Greenhouse
35	M	4	6	Banana	1	250	20	Effective actions against pest and disease	Presense of pest and diseases	Greenhouse
56	F	3	10	Banana	1	400	20	Effective actions against pest and disease	Presense of pest and diseases	Greenhouse
48	F	1	10	Banana	1	0	0	Effective actions against pest and disease, credits	Presense of pest and diseases	Greenhouse
24	F	3	10	Banana	1	900	21	Credits	Less production	Greenhouse
64	M	4	45	Banana	6	2800	18	Access to infrastructure	Low sale cost	Technology and management networks
55	F	4	35	Banana	2	1800	18	Access to infrastructure	Low sale cost	Technology and management networks
21	M	1	2	Banana	3	2600	18	Access to infrastructure	Low sale cost	Technology and management networks
67	M	2	25	Banana	2	250	20	Effective actions against pest and disease	Presense of pest and diseases	Greenhouse
57	F	2	30	Banana	2	500	20	Effective actions against pest and disease	Presense of pest and diseases	Greenhouse
51	F	6	30	Banana, corn	1.5	400	20.5	Effective actions against pest and disease	Presense of pest and diseases	Greenhouse
26	F	3	4	Banana	1.5	300	20.5	Effective actions against pest and disease	Presense of pest and diseases	Greenhouse
56	M	6	30	No	1	200	20.5	Effective actions against pest and disease	Presense of pest and diseases	Greenhouse
62	F	1	45	Banana	2.5	280	17	Effective actions against pest and disease	Presense of pest and diseases	Greenhouse
49	M	3	20	No	3	1400	17	Credits	Lack of infrastructure	Technology and management networks
39	F	3	15	Banana	3	1200	17	Credits	Lack of infrastructure	Technology and management networks
23	M	3	4	Banana	2	500	16	Renovated plants	Old plantations	Greenhouse
40	F	3	15	Corn	0.5	180	20	Effective actions against pest and disease	Presense of pest and diseases	Greenhouse
48	F	6	27	No	1.5	300	16	Effective actions against pest and disease	Presense of pest and diseases	Greenhouse
36	F	4	15	Banana	1	200	18	Effective actions against pest and disease	Presense of pest and diseases	Greenhouse
36	M	4	10	Corn	1	150	18	Effective actions against pest and disease	Presense of pest and diseases	Greenhouse
28	F	4	5	No	1.5	320	17	Effective actions against pest and disease	Presense of pest and diseases	Greenhouse
33	F	5	15	Banana	1	500	17	Better nutrition in plant	Less production	Greenhouse
49	F	6	20	No	1.5	500	17	Better nutrition in plant	Less production	Greenhouse
48	F	8	16	Banana	1	150	20	Effective actions against pest and disease	Presense of pest and diseases	Greenhouse
43	F	4	10	Banana	1	600	23	Effective actions against pest and disease	Presense of pest and diseases	Greenhouse
34	F	6	18	Banana	1	500	20	Effective actions against pest and disease	Presense of pest and diseases	Greenhouse
25	F	4	2	Banana	1	0	0	Effective actions against pest and disease	Presense of pest and diseases	Greenhouse
44	F	5	22	Banana	1	50	17	Effective actions against pest and disease	Presense of pest and diseases	Greenhouse
40	M	5	18	Banana	2	1600	24	Access to infrastructure	Lack of commercialization channels	Technology and management networks
70	F	4	40	Banana	1	600	24	Monitoring coffee crops	Presense of pest and diseases	Greenhouse
60	F	2	25	Banana	1	900	21.8	Access to infrastructure	Low sale cost	Technology and management networks
61	M	2	35	Banana, orange	2	900	24	Access to infrastructure	Low sale cost	Technology and management networks
35	M	7	10	Banana, orange	1.5	300	17	Effective actions against pest and disease	Presense of pest and diseases	Greenhouse
34	F	7	8	Banana, orange	1.5	350	19	Effective actions against pest and disease	Presense of pest and diseases	Greenhouse
53	M	2	15	Banana, orange	1	600	20	Effective actions against pest and disease	Presense of pest and diseases	Greenhouse
50	F	2	16	Banana, orange	0.5	300	20	Effective actions against pest and disease	Presense of pest and diseases	Greenhouse
37	M	3	10	Banana, orange	1	250	19	Effective actions against pest and disease	Presense of pest and diseases	Greenhouse
77	F	3	20	Orange	2	600	19	Effective actions against pest and disease	Presense of pest and diseases	Greenhouse
61	M	3	40	Banana	4	2000	23	Access to infrastructure	Lack of infrastructure	Technology and management networks
56	F	3	40	Banana, corn	4	1500	24	Credits	Low sale cost	Networks with financial institutions and experts.
76	M	2	20	Banana	1	0	0	Effective actions against pest and disease	Presense of pest and diseases	Greenhouse
76	F	2	40	Banana	1	0	0	Effective actions against pest and disease	Presense of pest and diseases	Greenhouse
60	F	1	15	Banana, pineapple	2	800	18	Effective actions against pest and disease	Presense of pest and diseases, lack of infrastructure	Greenhouse
46	F	7	15	Banana	1.5	1100	21	Monitoring coffee crops	Climate changes	Technology and management networks
44	F	5	18	Banana	2.5	2300	21	Access to infrastructure	Lack of infrastructure	Technology and management networks
48	F	5	4	Banana	2	100	22	Effective actions against pest and disease	Presense of pest and diseases	Greenhouse
30	F	5	8	Banana	2	500	17	Effective actions against pest and disease	Presense of pest and diseases	Greenhouse
25	F	3	10	Banana	2.5	1500	20	Access to infrastructure	Low sale cost	Technology and management networks
51	F	8	25	Corn	3	3000	21	Access to infrastructure	Low sale cost	Technology and management networks
28	F	6	8	Banana	1	600	21	Effective actions against pest and disease	Presense of pest and diseases	Greenhouse
37	F	3	8	Banana	1	200	21	Effective actions against pest and disease	Presense of pest and diseases	Greenhouse
40	F	7	15	Banana	1.5	800	16	Access to infrastructure	Low sale cost	Technology and management networks
69	M	3	40	Banana, corn	3	1000	20	Access to infrastructure	Low sale cost	Technology and management networks
44	F	3	15	Banana	1	300	20	Effective actions against pest and disease	Presense of pest and diseases	Greenhouse
43	F	6	20	Banana, corn	2	1000	17	Access to infrastructure	Low sale cost	Technology and management networks
27	M	3	2	Corn	0.5	200	17	Effective actions against pest and disease	Presense of pest and diseases	Greenhouse
36	M	4	17	Banana	2	2500	23.5	Access to infrastructure	Low sale cost	Technology and management networks
38	F	1	20	Banana	4	4800	23.5	Access to infrastructure	Low sale cost	Technology and management networks
34	M	4	16	Banana	1	400	18	Effective actions against pest and disease	Presense of pest and diseases	Greenhouse
44	F	5	16	No	1.5	300	19	Effective actions against pest and disease	Presense of pest and diseases	Greenhouse
42	M	4	16	No	1.5	400	19	Effective actions against pest and disease	Presense of pest and diseases	Greenhouse
65	M	4	35	No	2	1800	22	Access to infrastructure	Low sale cost	Technology and management networks
45	M	8	25	Banana, corn	1.5	900	17	Access to infrastructure	Low sale cost, less production	Technology and management networks
51	M	5	30	Banana	1.5	1200	20	Access to infrastructure	Low sale cost	Technology and management networks
45	F	5	25	Banana	2	800	20	Access to infrastructure, effective actions against pest and disease	Low sale cost	Technology and management networks
69	M	2	40	Banana	1.5	900	20	Access to infrastructure	Low sale cost	Technology and management networks
65	F	3	50	Banana	1.5	900	20	Access to infrastructure	Low sale cost	Technology and management networks
40	F	5	15	Banana	1.5	850	23.5	Access to infrastructure	Less production	Technology and management networks
55	F	4	30	Banana	1	500	17	Access to infrastructure, effective actions against pest and disease	Low sale cost	Technology and management networks
43	F	7	15	Banana	2.5	1100	21	Access to infrastructure	Low sale cost	Technology and management networks
35	M	5	10	No	2	900	17	Access to infrastructure, effective actions against pest and disease	Low sale cost	Technology and management networks
32	F	7	10	No	1.5	700	17	Access to infrastructure, effective actions against pest and disease	Low sale cost	Technology and management networks
42	F	2	7	Banana	0.5	300	17	Effective actions against pest and disease	Presense of pest and diseases	Greenhouse
58	M	13	43	Banana	3	2000	24	Access to infrastructure	Low sale cost	Technology and management networks
74	F	2	30	No	1.5	500	20	Access to infrastructure, effective actions against pest and disease	Low sale cost, presense of pest and diseases	Greenhouse
55	F	4	30	Banana, corn	5	500	15	Access to infrastructure, effective actions against pest and disease	Low sale cost	Greenhouse
46	F	12	20	Banana, corn	2	600	15	Access to infrastructure, effective actions against pest and disease	Low sale cost	Greenhouse
60	F	12	30	Banana, corn	4	700	15	Access to infrastructure, effective actions against pest and disease	Low sale cost	Greenhouse, technology and management networks
27	M	1	5	Banana, corn	2	100	15	Effective actions against pest and disease	Presense of pest and diseases	Greenhouse
36	F	4	8	No	2	143	16	Effective actions against pest and disease	Presense of pest and diseases	Greenhouse
50	F	6	18	Banana, corn	3	1000	16	Effective actions against pest and disease	Presense of pest and diseases, low sale cost	Greenhouse, technology and management networks
70	F	2	30	Corn, bean	2	800	20	Effective actions against pest and disease	Presense of pest and diseases, low sale cost	Greenhouse, technology and management networks
57	F	4	19	Banana, corn	1.5	400	16	Effective actions against pest and disease	Presense of pest and diseases	Greenhouse
75	F	1	35	No	1	600	18	Access to infrastructure	Less production, low sale cost	Technology and management networks
47	F	6	20	Banana	2.5	700	17	Access to infrastructure	Less production, low sale cost	Technology and management networks
47	F	6	15	Banana	3.5	800	14	Access to infrastructure	Less production, low sale cost	Technology and management networks
76	F	2	35	Banana	4	45	17	Effective actions against pest and disease	Presense of pest and diseases	Greenhouse
54	F	2	7	No	2	860	24	Access to infrastructure	Less production	Technology and management networks
52	F	6	20	Banana	2	800	20	Access to infrastructure	Low sale cost	Technology and management networks
75	M	1	40	Banana	3	800	15	Access to infrastructure	Low sale cost	Technology and management networks
76	M	4	10	Banana	3	300	15	Effective actions against pest and disease	Presense of pest and diseases	Greenhouse
75	F	5	30	Banana, corn	2	100	21	Effective actions against pest and disease	Presense of pest and diseases	Greenhouse
40	M	1	20	Banana, corn	3	150	21	Effective actions against pest and disease	Presense of pest and diseases	Greenhouse
30	F	2	20	Banana, corn	1	50	21	Effective actions against pest and disease	Presense of pest and diseases	Greenhouse
33	F	2	5	Banana, corn	2	100	21	Effective actions against pest and disease	Presense of pest and diseases	Greenhouse
30	F	1	6	Banana, corn	1	60	21	Effective actions against pest and disease	Presense of pest and diseases	Greenhouse
43	M	7	20	Banana, corn	2	340	18	Effective actions against pest and disease	Presense of pest and diseases	Greenhouse
41	M	3	25	Banana, corn, orange	3	160	25	Effective actions against pest and disease	Presense of pest and diseases	Greenhouse
42	M	5	23	Banana, corn, orange	5	350	20	Effective actions against pest and disease	Presense of pest and diseases	Greenhouse
32	M	5	12	Banana, corn	3	600	22	Access to infrastructure	Low sale cost, lack of commercialization channels	Technology and management networks
46	F	7	25	Corn, pineapple	2	400	20	Effective actions against pest and disease	Presense of pest and diseases	Greenhouse
44	M	7	30	Corn, pineapple	3	250	21	Effective actions against pest and disease	Presense of pest and diseases	Greenhouse
52	F	5	30	Corn, pineapple	2	600	21	Access to infrastructure	Low sale cost, lack of commercialization channels	Technology and management networks
50	M	5	35	Banana	3.5	800	22	Access to infrastructure	Low sale cost, lack of commercialization channels	Technology and management networks
68	F	5	20	Corn, orange	1.5	200	22	Effective actions against pest and disease	Presense of pest and diseases	Greenhouse
